# Supplementary material
Source: publisher figshare collection journal article supplement (https://acs.figshare.com/ndownloader/files/3853432)
Supplement: Supplementary file 1 [file 3853432]

 
data_1a(lj116a)
 
_audit_creation_method            SHELXL-2013
_chemical_name_systematic
;
 ?
;
_chemical_name_common             ?
_chemical_melting_point           ?
_chemical_formula_moiety          ?
_chemical_formula_sum
 'C19 H32 N Y' 
_chemical_formula_weight          363.36

loop_
 _atom_type_symbol
 _atom_type_description
 _atom_type_scat_dispersion_real
 _atom_type_scat_dispersion_imag
 _atom_type_scat_source
 'C'  'C'   0.0033   0.0016
 'International Tables Vol C Tables 4.2.6.8 and 6.1.1.4'
 'H'  'H'   0.0000   0.0000
 'International Tables Vol C Tables 4.2.6.8 and 6.1.1.4'
 'N'  'N'   0.0061   0.0033
 'International Tables Vol C Tables 4.2.6.8 and 6.1.1.4'
 'Y'  'Y'  -2.7962   3.5667
 'International Tables Vol C Tables 4.2.6.8 and 6.1.1.4'
 
_space_group_crystal_system       monoclinic
_space_group_IT_number            4
_space_group_name_H-M_alt         'P 21'
_space_group_name_Hall            'P 2yb'
 
_shelx_space_group_comment
;
The symmetry employed for this shelxl refinement is uniquely defined
by the following loop, which should always be used as a source of
symmetry information in preference to the above space-group names.
They are only intended as comments.
;
 
loop_
 _space_group_symop_operation_xyz
 'x, y, z'
 '-x, y+1/2, -z'
 
_cell_length_a                    8.4644(4)
_cell_length_b                    13.9975(5)
_cell_length_c                    8.5546(4)
_cell_angle_alpha                 90
_cell_angle_beta                  114.260(3)
_cell_angle_gamma                 90
_cell_volume                      924.05(7)
_cell_formula_units_Z             2
_cell_measurement_temperature     173(2)
_cell_measurement_reflns_used     10618
_cell_measurement_theta_min       5.82
_cell_measurement_theta_max       59.35

_exptl_crystal_description        plate
_exptl_crystal_colour             colorless
_exptl_crystal_density_meas       ? 
_exptl_crystal_density_method     ?              
_exptl_crystal_density_diffrn     1.306          
_exptl_crystal_F_000              384
_exptl_transmission_factor_min    ?                                             
_exptl_transmission_factor_max    ?                                             
_exptl_crystal_size_max           0.500
_exptl_crystal_size_mid           0.400
_exptl_crystal_size_min           0.200
_exptl_absorpt_coefficient_mu     3.151
_shelx_estimated_absorpt_T_min    0.302
_shelx_estimated_absorpt_T_max    0.571
_exptl_absorpt_correction_type    numerical
_exptl_absorpt_correction_T_min   0.36619
_exptl_absorpt_correction_T_max   1.04300
_exptl_absorpt_process_details    MulAbs
 
_exptl_special_details
;
 ?
;
 
_diffrn_ambient_temperature       173(2)
_diffrn_radiation_wavelength      0.71073
_diffrn_radiation_type            MoK\a
_diffrn_radiation_source          'fine-focus sealed tube'
_diffrn_radiation_monochromator   graphite
_diffrn_measurement_device_type   'STOE IPDS 2T'
_diffrn_measurement_method        'omega scans'
_diffrn_detector_area_resol_mean  ? 
_diffrn_reflns_number             17571
_diffrn_reflns_av_unetI/netI      0.0434
_diffrn_reflns_av_R_equivalents   0.0718
_diffrn_reflns_limit_h_min        -11
_diffrn_reflns_limit_h_max        11
_diffrn_reflns_limit_k_min        -19
_diffrn_reflns_limit_k_max        17
_diffrn_reflns_limit_l_min        -11
_diffrn_reflns_limit_l_max        11
_diffrn_reflns_theta_min          2.910
_diffrn_reflns_theta_max          29.151
_diffrn_reflns_theta_full         25.242
_diffrn_measured_fraction_theta_max   0.997
_diffrn_measured_fraction_theta_full  0.998
_diffrn_reflns_Laue_measured_fraction_max    0.997
_diffrn_reflns_Laue_measured_fraction_full   0.998
_diffrn_reflns_point_group_measured_fraction_max   0.959
_diffrn_reflns_point_group_measured_fraction_full  0.971
_reflns_number_total              4788
_reflns_number_gt                 4646
_reflns_threshold_expression      'I > 2\s(I)'
_reflns_Friedel_coverage          0.851
_reflns_Friedel_fraction_max      0.917
_reflns_Friedel_fraction_full     0.941
 
_reflns_special_details
;
 Reflections were merged by SHELXL according to the crystal
 class for the calculation of statistics and refinement.
 
 _reflns_Friedel_fraction is defined as the number of unique
 Friedel pairs measured divided by the number that would be
 possible theoretically, ignoring centric projections and
 systematic absences.
;

_computing_data_collection        'X-Area Software Package'
_computing_cell_refinement        'X-Area Software Package'
_computing_data_reduction         'X-Area Software Pachage'
_computing_structure_solution     'SHELXS-97 (Sheldrick, 1990)' 
_computing_structure_refinement   'SHELXL-2013 (Sheldrick, 2013)'
_computing_molecular_graphics     ?
_computing_publication_material   ?
 
_refine_special_details
;
 ?
;
_refine_ls_structure_factor_coef  Fsqd
_refine_ls_matrix_type            full
_refine_ls_weighting_scheme       calc
_refine_ls_weighting_details
'w=1/[\s^2^(Fo^2^)+(0.0333P)^2^+0.8589P] where P=(Fo^2^+2Fc^2^)/3'
_atom_sites_solution_primary      ?
_atom_sites_solution_secondary    ?
_atom_sites_solution_hydrogens    geom
_refine_ls_hydrogen_treatment     constr
_refine_ls_extinction_method      SHELXL
_refine_ls_extinction_coef        0.018(3)
_refine_ls_extinction_expression
 'Fc^*^=kFc[1+0.001xFc^2^\l^3^/sin(2\q)]^-1/4^'
_refine_ls_abs_structure_details
;
 Flack x determined using 2018 quotients [(I+)-(I-)]/[(I+)+(I-)]
 (Parsons and Flack (2004), Acta Cryst. A60, s61).
;
_refine_ls_abs_structure_Flack    -0.022(6)
_chemical_absolute_configuration  ?
_refine_ls_number_reflns          4788
_refine_ls_number_parameters      197
_refine_ls_number_restraints      1
_refine_ls_R_factor_all           0.0416
_refine_ls_R_factor_gt            0.0395
_refine_ls_wR_factor_ref          0.0928
_refine_ls_wR_factor_gt           0.0918
_refine_ls_goodness_of_fit_ref    1.154
_refine_ls_restrained_S_all       1.154
_refine_ls_shift/su_max           0.003
_refine_ls_shift/su_mean          0.000
 
loop_
 _atom_site_label
 _atom_site_type_symbol
 _atom_site_fract_x
 _atom_site_fract_y
 _atom_site_fract_z
 _atom_site_U_iso_or_equiv
 _atom_site_adp_type
 _atom_site_occupancy
 _atom_site_site_symmetry_order  
 _atom_site_calc_flag
 _atom_site_refinement_flags_posn
 _atom_site_refinement_flags_adp
 _atom_site_refinement_flags_occupancy
 _atom_site_disorder_assembly
 _atom_site_disorder_group
C1 C 0.0240(7) 0.1801(4) 0.7634(7) 0.0200(10) Uani 1 1 d . . . . .
C2 C -0.0413(5) 0.2112(3) 0.5916(6) 0.0221(8) Uani 1 1 d . . . . .
C3 C 0.0878(6) 0.1943(3) 0.5293(6) 0.0237(9) Uani 1 1 d . . . . .
C4 C 0.2316(6) 0.1511(3) 0.6605(6) 0.0259(9) Uani 1 1 d . . . . .
C5 C 0.1916(9) 0.1427(4) 0.8063(9) 0.0257(12) Uani 1 1 d . . . . .
C6 C -0.0737(7) 0.1749(4) 0.8757(7) 0.0326(10) Uani 1 1 d . . . . .
H6A H -0.0358 0.2269 0.9598 0.049 Uiso 1 1 calc R U . . .
H6B H -0.0506 0.1134 0.9358 0.049 Uiso 1 1 calc R U . . .
H6C H -0.1982 0.1810 0.8048 0.049 Uiso 1 1 calc R U . . .
C7 C -0.2227(6) 0.2478(4) 0.4925(6) 0.0317(10) Uani 1 1 d . . . . .
H7A H -0.2446 0.2544 0.3713 0.048 Uiso 1 1 calc R U . . .
H7B H -0.2356 0.3101 0.5381 0.048 Uiso 1 1 calc R U . . .
H7C H -0.3059 0.2026 0.5037 0.048 Uiso 1 1 calc R U . . .
C8 C 0.0775(8) 0.2194(4) 0.3530(7) 0.0321(12) Uani 1 1 d . . . . .
H8A H -0.0414 0.2411 0.2796 0.039 Uiso 1 1 calc R U . . .
H8B H 0.1017 0.1616 0.2998 0.039 Uiso 1 1 calc R U . . .
C9 C 0.3862(7) 0.1076(4) 0.6447(9) 0.0410(13) Uani 1 1 d . . . . .
H9A H 0.4924 0.1340 0.7335 0.062 Uiso 1 1 calc R U . . .
H9B H 0.3829 0.1221 0.5313 0.062 Uiso 1 1 calc R U . . .
H9C H 0.3845 0.0382 0.6590 0.062 Uiso 1 1 calc R U . . .
C10 C 0.2991(7) 0.0904(4) 0.9697(8) 0.0405(13) Uani 1 1 d . . . . .
H10A H 0.4220 0.0953 0.9919 0.061 Uiso 1 1 calc R U . . .
H10B H 0.2648 0.0230 0.9582 0.061 Uiso 1 1 calc R U . . .
H10C H 0.2803 0.1189 1.0654 0.061 Uiso 1 1 calc R U . . .
C11 C 0.2059(8) 0.2975(4) 0.3611(7) 0.0353(11) Uani 1 1 d . . . . .
H11A H 0.3251 0.2720 0.4192 0.042 Uiso 1 1 calc R U . . .
H11B H 0.1874 0.3153 0.2428 0.042 Uiso 1 1 calc R U . . .
C12 C 0.0200(9) 0.4295(5) 0.3596(8) 0.0412(15) Uani 1 1 d . . . . .
H12A H -0.0708 0.3887 0.3670 0.062 Uiso 1 1 calc R U . . .
H12B H -0.0006 0.4379 0.2390 0.062 Uiso 1 1 calc R U . . .
H12C H 0.0182 0.4919 0.4108 0.062 Uiso 1 1 calc R U . . .
C13 C 0.3227(9) 0.4530(4) 0.4500(8) 0.0453(15) Uani 1 1 d . . . . .
H13A H 0.4382 0.4245 0.5067 0.068 Uiso 1 1 calc R U . . .
H13B H 0.3171 0.5115 0.5104 0.068 Uiso 1 1 calc R U . . .
H13C H 0.3001 0.4684 0.3309 0.068 Uiso 1 1 calc R U . . .
C14 C 0.4503(6) 0.3265(8) 1.0622(6) 0.0417(11) Uani 1 1 d . . . . .
H14A H 0.3918 0.3862 1.0412 0.050 Uiso 1 1 calc R U . . .
H14B H 0.4520 0.2869 1.1530 0.050 Uiso 1 1 calc R U . . .
C15 C 0.5330(6) 0.2972(4) 0.9604(7) 0.0377(12) Uani 1 1 d . . . . .
H15 H 0.5897 0.2370 0.9864 0.045 Uiso 1 1 calc R U . . .
C16 C 0.5409(6) 0.3471(4) 0.8249(7) 0.0362(14) Uani 1 1 d . . . . .
H16A H 0.4862 0.4077 0.7940 0.043 Uiso 1 1 calc R U . . .
H16B H 0.6010 0.3210 0.7624 0.043 Uiso 1 1 calc R U . . .
C17 C 0.0067(8) 0.4170(4) 0.8629(9) 0.0463(15) Uani 1 1 d . . . . .
H17A H 0.0968 0.3850 0.9542 0.056 Uiso 1 1 calc R U . . .
H17B H -0.1109 0.4009 0.8349 0.056 Uiso 1 1 calc R U . . .
C18 C 0.0456(11) 0.4853(6) 0.7729(13) 0.048(2) Uani 1 1 d . . . . .
H18 H -0.0517 0.5138 0.6839 0.057 Uiso 1 1 calc R U . . .
C19 C 0.2029(10) 0.5201(5) 0.7894(12) 0.0402(17) Uani 1 1 d . . . . .
H19A H 0.3067 0.4953 0.8755 0.048 Uiso 1 1 calc R U . . .
H19B H 0.2083 0.5690 0.7148 0.048 Uiso 1 1 calc R U . . .
N1 N 0.1903(6) 0.3841(3) 0.4528(6) 0.0321(9) Uani 1 1 d . . . . .
Y1 Y 0.21037(4) 0.33165(5) 0.74988(4) 0.02071(12) Uani 1 1 d . . . . .
 
loop_
 _atom_site_aniso_label
 _atom_site_aniso_U_11
 _atom_site_aniso_U_22
 _atom_site_aniso_U_33
 _atom_site_aniso_U_23
 _atom_site_aniso_U_13
 _atom_site_aniso_U_12
C1 0.016(2) 0.023(3) 0.017(2) -0.0001(18) 0.0021(16) -0.0021(18)
C2 0.0193(18) 0.021(2) 0.024(2) 0.0032(16) 0.0071(16) 0.0010(16)
C3 0.026(2) 0.020(2) 0.027(2) -0.0023(16) 0.0128(17) -0.0024(17)
C4 0.026(2) 0.022(2) 0.031(2) -0.0017(18) 0.0128(18) 0.0014(17)
C5 0.028(3) 0.021(3) 0.029(3) 0.006(2) 0.012(2) 0.006(2)
C6 0.034(2) 0.037(3) 0.031(2) 0.002(2) 0.018(2) -0.002(2)
C7 0.025(2) 0.037(3) 0.029(2) 0.007(2) 0.0066(19) 0.005(2)
C8 0.043(3) 0.035(3) 0.025(2) -0.005(2) 0.022(2) -0.007(2)
C9 0.033(3) 0.032(3) 0.065(4) -0.005(3) 0.027(3) 0.006(2)
C10 0.032(3) 0.038(3) 0.044(3) 0.017(2) 0.007(2) 0.008(2)
C11 0.047(3) 0.036(3) 0.033(2) -0.002(2) 0.027(2) -0.006(2)
C12 0.055(4) 0.036(3) 0.039(3) 0.015(2) 0.026(3) 0.011(3)
C13 0.066(4) 0.035(3) 0.049(3) 0.000(3) 0.037(3) -0.017(3)
C14 0.0264(18) 0.057(3) 0.0301(19) 0.003(4) -0.0001(15) 0.006(4)
C15 0.0166(19) 0.039(3) 0.047(3) -0.004(2) 0.002(2) 0.0008(18)
C16 0.0217(17) 0.038(4) 0.050(3) -0.007(2) 0.0149(18) -0.002(2)
C17 0.044(3) 0.034(3) 0.077(4) -0.015(3) 0.041(3) 0.002(2)
C18 0.051(4) 0.032(4) 0.069(5) -0.008(3) 0.034(4) 0.009(3)
C19 0.038(4) 0.026(3) 0.061(5) 0.002(3) 0.025(3) 0.006(3)
N1 0.043(2) 0.027(2) 0.033(2) 0.0025(17) 0.022(2) -0.0037(18)
Y1 0.01878(16) 0.02049(18) 0.02283(17) -0.0006(3) 0.00851(11) 0.0019(3)
 
_geom_special_details
;
 All esds (except the esd in the dihedral angle between two l.s. planes)
 are estimated using the full covariance matrix.  The cell esds are taken
 into account individually in the estimation of esds in distances, angles
 and torsion angles; correlations between esds in cell parameters are only
 used when they are defined by crystal symmetry.  An approximate (isotropic)
 treatment of cell esds is used for estimating esds involving l.s. planes.
;
 
loop_
 _geom_bond_atom_site_label_1
 _geom_bond_atom_site_label_2
 _geom_bond_distance
 _geom_bond_site_symmetry_2
 _geom_bond_publ_flag
C1 C2 1.410(7) . ?
C1 C5 1.412(9) . ?
C1 C6 1.505(7) . ?
C1 Y1 2.675(6) . ?
C2 C3 1.419(6) . ?
C2 C7 1.506(6) . ?
C2 Y1 2.616(5) . ?
C3 C4 1.408(7) . ?
C3 C8 1.516(7) . ?
C3 Y1 2.593(4) . ?
C4 C5 1.425(8) . ?
C4 C9 1.500(7) . ?
C4 Y1 2.667(5) . ?
C5 C10 1.508(8) . ?
C5 Y1 2.705(6) . ?
C8 C11 1.523(8) . ?
C11 N1 1.479(7) . ?
C12 N1 1.474(8) . ?
C13 N1 1.486(7) . ?
C14 C15 1.384(8) . ?
C14 Y1 2.609(4) . ?
C15 C16 1.378(8) . ?
C15 Y1 2.625(5) . ?
C16 Y1 2.610(5) . ?
C17 C18 1.350(11) . ?
C17 Y1 2.590(5) . ?
C18 C19 1.369(12) . ?
C18 Y1 2.614(7) . ?
C19 Y1 2.663(7) . ?
N1 Y1 2.583(4) . ?
 
loop_
 _geom_angle_atom_site_label_1
 _geom_angle_atom_site_label_2
 _geom_angle_atom_site_label_3
 _geom_angle
 _geom_angle_site_symmetry_1
 _geom_angle_site_symmetry_3
 _geom_angle_publ_flag
C2 C1 C5 107.9(5) . . ?
C2 C1 C6 126.7(5) . . ?
C5 C1 C6 125.0(5) . . ?
C2 C1 Y1 72.3(3) . . ?
C5 C1 Y1 76.0(3) . . ?
C6 C1 Y1 123.7(4) . . ?
C1 C2 C3 107.9(4) . . ?
C1 C2 C7 124.3(4) . . ?
C3 C2 C7 127.6(4) . . ?
C1 C2 Y1 76.9(3) . . ?
C3 C2 Y1 73.3(3) . . ?
C7 C2 Y1 119.8(3) . . ?
C4 C3 C2 108.6(4) . . ?
C4 C3 C8 124.8(4) . . ?
C2 C3 C8 126.6(4) . . ?
C4 C3 Y1 77.4(3) . . ?
C2 C3 Y1 75.1(3) . . ?
C8 C3 Y1 113.2(3) . . ?
C3 C4 C5 107.2(4) . . ?
C3 C4 C9 127.1(5) . . ?
C5 C4 C9 125.1(5) . . ?
C3 C4 Y1 71.6(3) . . ?
C5 C4 Y1 76.1(3) . . ?
C9 C4 Y1 125.1(4) . . ?
C1 C5 C4 108.4(5) . . ?
C1 C5 C10 125.5(6) . . ?
C4 C5 C10 125.6(5) . . ?
C1 C5 Y1 73.6(3) . . ?
C4 C5 Y1 73.2(3) . . ?
C10 C5 Y1 125.7(4) . . ?
C3 C8 C11 111.9(5) . . ?
N1 C11 C8 113.3(4) . . ?
C15 C14 Y1 75.3(3) . . ?
C16 C15 C14 126.2(6) . . ?
C16 C15 Y1 74.1(3) . . ?
C14 C15 Y1 74.0(3) . . ?
C15 C16 Y1 75.4(3) . . ?
C18 C17 Y1 76.0(4) . . ?
C17 C18 C19 130.4(9) . . ?
C17 C18 Y1 74.0(4) . . ?
C19 C18 Y1 76.9(4) . . ?
C18 C19 Y1 73.0(5) . . ?
C12 N1 C11 110.3(5) . . ?
C12 N1 C13 106.8(5) . . ?
C11 N1 C13 106.9(4) . . ?
C12 N1 Y1 108.0(3) . . ?
C11 N1 Y1 107.7(3) . . ?
C13 N1 Y1 117.1(4) . . ?
N1 Y1 C17 116.8(2) . . ?
N1 Y1 C3 69.50(14) . . ?
C17 Y1 C3 119.03(18) . . ?
N1 Y1 C14 136.39(17) . . ?
C17 Y1 C14 89.3(2) . . ?
C3 Y1 C14 129.4(3) . . ?
N1 Y1 C16 81.30(17) . . ?
C17 Y1 C16 132.9(2) . . ?
C3 Y1 C16 107.96(16) . . ?
C14 Y1 C16 56.34(17) . . ?
N1 Y1 C18 91.1(2) . . ?
C17 Y1 C18 30.1(2) . . ?
C3 Y1 C18 126.8(2) . . ?
C14 Y1 C18 99.2(3) . . ?
C16 Y1 C18 117.7(2) . . ?
N1 Y1 C2 87.91(14) . . ?
C17 Y1 C2 88.00(17) . . ?
C3 Y1 C2 31.61(14) . . ?
C14 Y1 C2 129.6(2) . . ?
C16 Y1 C2 138.03(16) . . ?
C18 Y1 C2 102.9(2) . . ?
N1 Y1 C15 110.88(17) . . ?
C17 Y1 C15 119.5(2) . . ?
C3 Y1 C15 110.82(16) . . ?
C14 Y1 C15 30.67(18) . . ?
C16 Y1 C15 30.53(18) . . ?
C18 Y1 C15 122.4(2) . . ?
C2 Y1 C15 129.28(16) . . ?
N1 Y1 C19 81.3(2) . . ?
C17 Y1 C19 56.0(2) . . ?
C3 Y1 C19 143.5(2) . . ?
C14 Y1 C19 86.9(3) . . ?
C16 Y1 C19 88.0(2) . . ?
C18 Y1 C19 30.1(3) . . ?
C2 Y1 C19 130.3(2) . . ?
C15 Y1 C19 99.6(2) . . ?
N1 Y1 C4 88.42(14) . . ?
C17 Y1 C4 132.66(17) . . ?
C3 Y1 C4 31.02(15) . . ?
C14 Y1 C4 98.7(3) . . ?
C16 Y1 C4 87.57(17) . . ?
C18 Y1 C4 154.4(2) . . ?
C2 Y1 C4 51.50(14) . . ?
C15 Y1 C4 81.33(16) . . ?
C19 Y1 C4 169.3(2) . . ?
N1 Y1 C1 117.81(16) . . ?
C17 Y1 C1 81.66(19) . . ?
C3 Y1 C1 51.44(15) . . ?
C14 Y1 C1 99.1(2) . . ?
C16 Y1 C1 130.32(18) . . ?
C18 Y1 C1 107.88(17) . . ?
C2 Y1 C1 30.89(15) . . ?
C15 Y1 C1 106.89(18) . . ?
C19 Y1 C1 137.3(2) . . ?
C4 Y1 C1 51.03(16) . . ?
N1 Y1 C5 117.95(17) . . ?
C17 Y1 C5 106.7(2) . . ?
C3 Y1 C5 50.93(18) . . ?
C14 Y1 C5 82.4(3) . . ?
C16 Y1 C5 99.96(19) . . ?
C18 Y1 C5 135.9(2) . . ?
C2 Y1 C5 50.75(17) . . ?
C15 Y1 C5 79.56(19) . . ?
C19 Y1 C5 159.97(17) . . ?
C4 Y1 C5 30.75(18) . . ?
C1 Y1 C5 30.43(19) . . ?
 
_refine_diff_density_max    0.509
_refine_diff_density_min   -0.769
_refine_diff_density_rms    0.077

_shelxl_version_number 2013-3

_shelx_res_file
;
TITL lj116a in P 21
CELL  0.71073   8.4644  13.9975   8.5546   90.000  114.260   90.000
ZERR     2.00   0.0004   0.0005   0.0004    0.000    0.003    0.000
LATT  -1
SYMM  - X, 1/2 + Y, - Z
SFAC  C    H    N    Y
UNIT  38   64   2    2
MERG   2
FMAP   2
SIZE 0.5 0.4 0.2
TEMP -100
PLAN   20
ACTA
BOND
L.S.  28

WGHT    0.033300    0.858900
EXTI    0.017654
FVAR       1.00348
C1    1    0.023983    0.180070    0.763374    11.00000    0.01557    0.02320 =
         0.01676   -0.00008    0.00205   -0.00210
C2    1   -0.041307    0.211215    0.591553    11.00000    0.01925    0.02117 =
         0.02411    0.00319    0.00708    0.00097
C3    1    0.087820    0.194324    0.529283    11.00000    0.02633    0.02006 =
         0.02667   -0.00235    0.01280   -0.00241
C4    1    0.231552    0.151143    0.660535    11.00000    0.02591    0.02239 =
         0.03053   -0.00170    0.01281    0.00136
C5    1    0.191628    0.142709    0.806307    11.00000    0.02782    0.02080 =
         0.02864    0.00559    0.01177    0.00620
C6    1   -0.073662    0.174899    0.875747    11.00000    0.03406    0.03718 =
         0.03111    0.00205    0.01798   -0.00167
AFIX 137
H6A   2   -0.035847    0.226915    0.959795    11.00000   -1.50000
H6B   2   -0.050567    0.113406    0.935786    11.00000   -1.50000
H6C   2   -0.198152    0.181011    0.804826    11.00000   -1.50000
AFIX   0
C7    1   -0.222713    0.247791    0.492540    11.00000    0.02467    0.03681 =
         0.02924    0.00674    0.00655    0.00542
AFIX 137
H7A   2   -0.244642    0.254415    0.371310    11.00000   -1.50000
H7B   2   -0.235605    0.310128    0.538138    11.00000   -1.50000
H7C   2   -0.305924    0.202629    0.503750    11.00000   -1.50000
AFIX   0
C8    1    0.077543    0.219411    0.352989    11.00000    0.04340    0.03540 =
         0.02537   -0.00548    0.02213   -0.00651
AFIX  23
H8A   2   -0.041378    0.241101    0.279638    11.00000   -1.20000
H8B   2    0.101698    0.161590    0.299825    11.00000   -1.20000
AFIX   0
C9    1    0.386226    0.107595    0.644736    11.00000    0.03320    0.03200 =
         0.06501   -0.00477    0.02736    0.00588
AFIX 137
H9A   2    0.492404    0.134002    0.733537    11.00000   -1.50000
H9B   2    0.382861    0.122137    0.531349    11.00000   -1.50000
H9C   2    0.384482    0.038189    0.658997    11.00000   -1.50000
AFIX   0
C10   1    0.299082    0.090373    0.969721    11.00000    0.03155    0.03831 =
         0.04351    0.01732    0.00721    0.00775
AFIX 137
H10A  2    0.421957    0.095251    0.991859    11.00000   -1.50000
H10B  2    0.264795    0.022976    0.958159    11.00000   -1.50000
H10C  2    0.280335    0.118875    1.065360    11.00000   -1.50000
AFIX   0
C11   1    0.205933    0.297504    0.361062    11.00000    0.04675    0.03595 =
         0.03312   -0.00174    0.02650   -0.00571
AFIX  23
H11A  2    0.325084    0.271962    0.419167    11.00000   -1.20000
H11B  2    0.187446    0.315329    0.242803    11.00000   -1.20000
AFIX   0
C12   1    0.020016    0.429457    0.359597    11.00000    0.05504    0.03624 =
         0.03915    0.01546    0.02622    0.01066
AFIX 137
H12A  2   -0.070801    0.388710    0.367025    11.00000   -1.50000
H12B  2   -0.000635    0.437943    0.239024    11.00000   -1.50000
H12C  2    0.018233    0.491864    0.410775    11.00000   -1.50000
AFIX   0
C13   1    0.322699    0.452973    0.449979    11.00000    0.06563    0.03452 =
         0.04913    0.00002    0.03704   -0.01691
AFIX 137
H13A  2    0.438179    0.424465    0.506727    11.00000   -1.50000
H13B  2    0.317124    0.511477    0.510437    11.00000   -1.50000
H13C  2    0.300128    0.468391    0.330927    11.00000   -1.50000
AFIX   0
C14   1    0.450296    0.326488    1.062176    11.00000    0.02637    0.05691 =
         0.03015    0.00335   -0.00014    0.00583
AFIX  93
H14A  2    0.391814    0.386187    1.041156    11.00000   -1.20000
H14B  2    0.452044    0.286876    1.153047    11.00000   -1.20000
AFIX   0
C15   1    0.532975    0.297216    0.960380    11.00000    0.01662    0.03895 =
         0.04684   -0.00439    0.00217    0.00083
AFIX  43
H15   2    0.589655    0.236995    0.986387    11.00000   -1.20000
AFIX   0
C16   1    0.540877    0.347139    0.824882    11.00000    0.02171    0.03759 =
         0.04966   -0.00725    0.01489   -0.00242
AFIX  93
H16A  2    0.486166    0.407705    0.793963    11.00000   -1.20000
H16B  2    0.601033    0.320978    0.762417    11.00000   -1.20000
AFIX   0
C17   1    0.006667    0.417012    0.862912    11.00000    0.04418    0.03412 =
         0.07690   -0.01509    0.04128    0.00165
AFIX  93
H17A  2    0.096812    0.385045    0.954185    11.00000   -1.20000
H17B  2   -0.110903    0.400945    0.834940    11.00000   -1.20000
AFIX   0
C18   1    0.045647    0.485281    0.772947    11.00000    0.05142    0.03250 =
         0.06905   -0.00779    0.03446    0.00923
AFIX  43
H18   2   -0.051700    0.513770    0.683893    11.00000   -1.20000
AFIX   0
C19   1    0.202934    0.520054    0.789433    11.00000    0.03797    0.02601 =
         0.06100    0.00196    0.02469    0.00594
AFIX  93
H19A  2    0.306685    0.495277    0.875538    11.00000   -1.20000
H19B  2    0.208307    0.568957    0.714765    11.00000   -1.20000
AFIX   0
N1    3    0.190309    0.384128    0.452777    11.00000    0.04254    0.02666 =
         0.03306    0.00249    0.02153   -0.00370
Y1    4    0.210366    0.331647    0.749878    11.00000    0.01878    0.02049 =
         0.02283   -0.00055    0.00851    0.00185
HKLF    4

REM  lj116a in P 21
REM R1 =  0.0395 for    4646 Fo > 4sig(Fo)  and  0.0416 for all    4788 data
REM    197 parameters refined using      1 restraints

END

WGHT      0.0341      0.8531

REM Highest difference peak  0.509,  deepest hole -0.769,  1-sigma level  0.077
Q1    1   0.1181  0.4778  0.8941  11.00000  0.05    0.51
Q2    1   0.0575  0.3325  0.7593  11.00000  0.05    0.49
Q3    1   0.1139  0.1838  0.8942  11.00000  0.05    0.42
Q4    1   0.3853  0.3336  1.0012  11.00000  0.05    0.36
Q5    1   0.2978  0.3244  0.7197  11.00000  0.05    0.36
Q6    1   0.3807  0.3006  0.7938  11.00000  0.05    0.35
Q7    1   0.1651  0.3349  0.6136  11.00000  0.05    0.35
Q8    1   0.3702  0.3634  0.7990  11.00000  0.05    0.34
Q9    1   0.2963  0.2736  0.8255  11.00000  0.05    0.34
Q10   1   0.4401  0.3298  0.7439  11.00000  0.05    0.31
Q11   1   0.3726  0.3463  0.6987  11.00000  0.05    0.30
Q12   1   0.2835  0.5605  0.8939  11.00000  0.05    0.29
Q13   1   0.5790  0.3300  0.9244  11.00000  0.05    0.29
Q14   1   0.2037  0.1345  0.8787  11.00000  0.05    0.29
Q15   1  -0.0153  0.2017  0.6760  11.00000  0.05    0.28
Q16   1  -0.0104  0.4670  0.6746  11.00000  0.05    0.28
Q17   1   0.2335  0.3308  0.4568  11.00000  0.05    0.28
Q18   1   0.4650  0.3825  1.1125  11.00000  0.05    0.27
Q19   1   0.2178  0.1229  0.7432  11.00000  0.05    0.27
Q20   1   0.0564  0.4290  1.0014  11.00000  0.05    0.27
;
_shelx_res_checksum   58184

_shelx_hkl_file
;
 -11   0   2   29.49    9.36
 -11   0   2   10.99    9.18
 -11   0   3  207.13    9.92
 -11   0   4   70.18   10.79
 -11   0   5  214.26   11.42
 -11   0   6   51.63   10.23
 -11   0   7  205.71    9.28
 -11   1   2  156.45   11.10
 -11   1   2  171.49   10.61
  11   1  -2  156.33   11.00
  11   1  -2  184.62   12.13
  11   1  -3   18.70   10.60
 -11   1   3   31.17    9.29
  11   1  -3   62.53   10.75
  11   1  -3   29.65    8.74
  11   1  -4  154.61    9.48
  11   1  -4  157.20   11.30
 -11   1   4  125.52    9.62
  11   1  -4  119.64    8.95
  11   1  -5   81.20    9.16
  11   1  -5   62.31    7.96
 -11   1   5   79.37    9.47
  11   1  -5   60.93    9.85
 -11   1   6  245.96    9.59
  11   1  -6  316.20   12.26
  11   1  -6  216.91    9.03
  11   1  -6  280.53   10.33
  11   1  -7   74.20   12.79
 -11   1   7   69.02    8.59
  11   1  -7   57.53    8.35
  11   1  -7   49.54    9.42
  11   2  -2   41.39    8.91
 -11   2   2   61.25   10.96
 -11   2   2   57.61   10.87
  11   2  -2   38.14    9.47
  11   2  -3  250.66   10.17
  11   2  -3  248.00   10.78
  11   2  -3  253.59    9.93
 -11   2   3  257.35   10.64
  11   2  -4   94.19   10.20
  11   2  -4   48.04    9.04
 -11   2   4   65.49   10.75
  11   2  -4   69.70    8.92
  11   2  -5  223.73   11.18
  11   2  -5  207.97    8.91
 -11   2   5  209.97   10.09
  11   2  -5  224.57    9.81
  11   2  -6  147.32   13.48
 -11   2   6  108.21    9.22
  11   2  -6  135.13   11.28
  11   2  -6   82.49    8.26
  11   2  -7   79.88   10.98
  11   2  -7  260.70   12.02
  11   2  -7  175.69    8.88
 -11   2   7  177.82    8.92
 -11   3   2  157.89   11.61
 -11   3   2  129.86    9.21
  11   3  -2  132.56    9.60
  11   3  -2  138.19   11.30
  11   3  -3   51.98   10.77
 -11   3   3   97.98   12.15
  11   3  -3   50.30    8.87
  11   3  -3   53.23    9.66
  11   3  -4  128.03   12.90
  11   3  -4  156.18   10.15
  11   3  -4  166.77   10.56
 -11   3   4  175.04    9.88
  11   3  -5  130.56    8.56
 -11   3   5  109.79    9.41
  11   3  -5  117.55   10.53
  11   3  -6   82.95    8.03
 -11   3   6   64.56   10.84
  11   3  -6   84.99   12.05
 -11   3   7   31.51   10.69
  11   3  -7   33.58    9.07
  11   3  -7   35.34   10.77
  11   3  -7   26.34    8.12
 -11   4   3  153.61   10.94
  11   4  -3  115.35    8.93
  11   4  -3  162.19   13.00
 -11   4   4   47.70    9.49
  11   4  -4   26.80   10.59
  11   4  -4   36.45   10.01
  11   4  -4   41.32   12.19
  11   4  -5   67.53    8.59
  11   4  -5  165.29   16.05
  11   4  -5  100.61    9.97
 -11   4   5  110.62    9.62
 -11   4   6   40.35    9.14
  11   4  -6   15.13    8.87
  11   4  -6   24.53    7.95
  11   4  -6   19.63   13.27
 -11   4   7  114.59    9.77
  11   4  -7  152.90   12.11
  11   4  -7  183.29   15.39
  11   5  -3   44.80    8.22
 -11   5   3   21.40   10.03
  11   5  -3   26.93   10.01
  11   5  -3   15.87   10.61
  11   5  -4  125.66   12.06
  11   5  -4  119.28   10.50
  11   5  -4  115.88   11.19
 -11   5   4   99.69   12.81
 -11   5   5   44.89    9.06
  11   5  -5   27.31    9.91
  11   5  -5   47.02    8.41
  11   5  -5   26.86   14.38
  11   5  -6   81.83   10.39
  11   5  -6  118.49    8.94
  11   5  -6   89.38   13.74
 -11   5   6  132.27   10.76
  10  -6   0   80.74    8.99
 -10  -6   0   78.43    9.33
  10  -6   0   68.98    9.21
 -10  -6   0   87.81   10.22
  10  -5   0  140.54    9.65
  10  -5   0  125.03   10.95
 -10  -5   0  152.11   10.92
 -10  -5   0  146.42   10.41
 -10  -4   0  151.73   10.27
  10  -4   0  109.49    9.75
 -10  -4   0  151.29   10.31
  10  -4   0  126.10    9.75
  10  -3   1   94.58   12.14
  10  -3   0   66.03    9.39
  10  -3   0   64.19    9.07
 -10  -3   0   64.33    9.72
 -10  -3   0  109.13    9.85
 -10  -2  -1   54.11   11.20
  10  -2   1   58.64   13.11
  10  -2   1   66.26    9.84
 -10  -2  -1   70.78   10.39
 -10  -2   0   72.95   10.00
 -10  -2   0   65.00    9.87
  10  -2   0   69.46    8.93
  10  -2   0   82.40    9.39
  10  -1   1   13.27    9.18
 -10  -1  -1   32.17   11.13
  10  -1   1   31.83   10.89
 -10  -1  -1   52.10   10.49
  10  -1   0  150.07   11.15
  10  -1   0  141.81    9.69
 -10  -1   0  130.42   12.01
 -10  -1   0  145.76   10.16
 -10   0  -1  118.45   11.26
 -10   0  -1   90.00   11.63
 -10   0   0  216.65   11.92
 -10   0   0  227.50   11.98
 -10   0   1  277.16   10.08
 -10   0   1  302.06   11.15
 -10   0   2  365.07   10.35
 -10   0   2  350.99   10.91
 -10   0   3  122.41    8.76
 -10   0   4  224.67    8.61
 -10   0   5  126.15    8.36
 -10   0   6  105.06   10.51
 -10   0   7  108.20    7.94
 -10   0   8  221.12    9.21
 -10   0   9   66.84    8.31
  10   1  -1  304.75   13.43
 -10   1   1  280.92   10.55
 -10   1   1  287.52   11.20
  10   1  -1  275.07    9.21
  10   1  -2  117.68    8.78
  10   1  -2  118.65    8.12
 -10   1   2  134.20   13.83
 -10   1   2  147.77    8.94
  10   1  -3  216.63    9.09
 -10   1   3  212.19    9.76
  10   1  -3  209.02    8.25
  10   1  -4  121.59    7.73
  10   1  -4  153.58   10.31
  10   1  -4  136.76    8.33
 -10   1   4  119.36    8.14
  10   1  -5  336.99    9.84
  10   1  -5  318.81   12.27
  10   1  -5  286.68    9.75
 -10   1   5  309.61   10.73
 -10   1   6  174.16    9.37
  10   1  -6  194.24    9.72
  10   1  -6  199.75   11.08
  10   1  -6  204.75    8.84
  10   1  -7  250.86    9.80
 -10   1   7  214.35    8.93
  10   1  -7  280.25   11.11
  10   1  -7  175.69    9.73
  10   1  -8  106.49    8.53
 -10   1   8  112.02    9.00
  10   1  -8  140.74    8.75
  10   1  -8  115.00   11.89
  10   1  -9  126.70   13.27
 -10   1   9  126.25    8.66
  10   1  -9  170.73    9.52
  10   1  -9  136.78    8.79
  10   2  -1  183.82   10.29
 -10   2   1  239.97   13.13
  10   2  -1  219.29   10.94
 -10   2   1  232.30    9.97
  10   2  -2  254.69   10.15
 -10   2   2  281.10   11.64
  10   2  -2  229.97    8.66
 -10   2   2  232.18   10.87
  10   2  -3   93.50    7.57
  10   2  -3  119.27   10.45
 -10   2   3  127.88   10.02
  10   2  -4  182.35   11.53
  10   2  -4  241.89    9.38
  10   2  -4  173.22    8.57
 -10   2   4  230.97    9.22
  10   2  -5  228.80    8.78
  10   2  -5  298.71   11.81
  10   2  -5  272.78   11.37
 -10   2   5  237.07    8.69
  10   2  -6  293.37   10.04
 -10   2   6  278.79    9.51
  10   2  -6  217.99    8.35
  10   2  -6  297.32   11.66
  10   2  -7  134.59    9.64
  10   2  -7   90.69   12.49
  10   2  -7   82.18    8.38
 -10   2   7  110.54    8.75
  10   2  -8  172.22    9.46
 -10   2   8  185.96   10.69
  10   2  -8  222.76    9.67
  10   2  -8  226.33   11.39
  10   2  -9   28.69   10.82
  10   2  -9   41.45    8.25
 -10   2   9   29.28    8.67
  10   2  -9   51.53    8.65
 -10   3   1  158.72    9.04
  10   3  -1  111.42    8.40
  10   3  -1  129.72   10.09
 -10   3   1  127.60   12.84
 -10   3   2   80.10    9.14
  10   3  -2  104.39    7.62
 -10   3   2   97.62    9.95
  10   3  -2   85.57    9.21
  10   3  -3   41.28    8.45
  10   3  -3  172.20    8.77
  10   3  -3  189.96   11.51
 -10   3   3  190.79   10.07
  10   3  -4  256.69   12.79
  10   3  -4  250.08   10.01
  10   3  -4  250.88   10.56
 -10   3   4  221.62   11.69
  10   3  -5  350.65   10.84
 -10   3   5  277.30   11.36
  10   3  -5  266.77    8.91
  10   3  -6   63.14    7.52
 -10   3   6   60.81    9.86
  10   3  -6  113.95   12.56
 -10   3   7  331.29   10.15
  10   3  -7  364.01   10.98
  10   3  -7  282.11    9.47
  10   3  -8  121.75   10.23
 -10   3   8   66.88    8.77
  10   3  -8  147.83   10.19
 -10   3   9   20.23    8.62
  10   3  -9   55.49    8.21
  10   3  -9   46.13    8.38
  10   4  -1  104.97    9.17
  10   4  -1   87.81   10.50
 -10   4   1  118.39   10.21
 -10   4   1   98.22   10.44
 -10   4   2  197.96   10.44
  10   4  -2  192.53   11.30
  10   4  -2  163.62    8.89
 -10   4   2  208.70    8.70
 -10   4   3  126.74    9.70
  10   4  -3  151.31   10.74
  10   4  -3  160.69    8.84
 -10   4   4  257.19   10.42
  10   4  -4  221.14   10.44
  10   4  -4  280.49   13.41
  10   4  -4  349.01   15.70
  10   4  -5   96.98    7.59
 -10   4   5  121.27    8.97
  10   4  -5  136.17   10.86
  10   4  -5  117.48    9.06
  10   4  -6  240.05   13.94
  10   4  -6  197.08    9.53
 -10   4   6  161.70    8.88
  10   4  -6  195.64    8.42
  10   4  -7   88.43    8.96
 -10   4   7   62.85    8.55
  10   4  -7   95.07   14.20
  10   4  -7   68.74    8.23
  10   4  -8  164.53   13.54
  10   4  -8   94.92    8.66
  10   4  -8  129.64    9.81
 -10   4   8  123.53    8.94
  10   4  -9   24.88    9.66
  10   4  -9   19.68   13.65
 -10   4   9   44.31    8.69
  10   4  -9   16.53    8.25
 -10   5   1  136.52    9.68
 -10   5   1  150.70   11.43
  10   5  -1  184.16   16.05
  10   5  -1  137.28    9.71
  10   5  -2   98.32    9.11
  10   5  -2   97.61   11.03
 -10   5   2  145.52    8.53
 -10   5   2  126.67   10.29
  10   5  -3  190.51   11.47
 -10   5   3  192.27   10.28
  10   5  -3  235.85   14.25
  10   5  -3  202.93    8.87
  10   5  -4  132.99   12.86
  10   5  -4  161.30   11.50
  10   5  -4  134.86    7.75
 -10   5   4  120.52    9.85
 -10   5   5  203.02   10.10
  10   5  -5  216.56   10.16
  10   5  -5  256.67   13.54
  10   5  -5  194.79   10.60
 -10   5   6   31.45    8.07
  10   5  -6   30.29   10.80
  10   5  -6   33.30    7.42
  10   5  -6   12.47   11.49
  10   5  -7  184.38    8.53
  10   5  -7  219.46   13.28
 -10   5   7  216.29    9.62
  10   5  -7  271.19   17.57
  10   5  -8  116.07   14.40
 -10   5   8   87.50    8.27
  10   5  -8   94.80    8.54
  10   5  -8   96.52   10.47
  10   6  -1  249.70    9.39
 -10   6   1  192.72   13.76
 -10   6   1  242.13    9.46
  10   6  -1  230.10   14.72
 -10   6   2  198.60   13.28
  10   6  -2  209.55    9.76
  10   6  -2  151.63   13.11
 -10   6   2  183.17    9.03
  10   6  -3  103.16   14.39
  10   6  -3  100.91   10.80
 -10   6   3   90.97    9.96
  10   6  -3  106.19    8.85
 -10   6   4  251.22   10.86
  10   6  -4  239.50    9.09
  10   6  -4  215.13   15.22
  10   6  -4  300.40   16.87
 -10   6   5   72.98    9.52
  10   6  -5   50.37   11.22
  10   6  -5   79.96   12.79
  10   6  -5   46.18    8.33
  10   6  -6  227.30    8.87
  10   6  -6  327.49   21.99
  10   6  -6  209.14   11.84
 -10   6   6  168.26   11.27
  10   6  -7  112.06    8.25
 -10   6   7   78.28    9.39
  10   6  -7  116.58   11.99
  10   6  -7  143.55   20.46
  10   6  -8  157.51   20.59
  10   6  -8  153.73   12.67
  10   6  -8  159.01    9.87
 -10   6   8  114.51    9.03
  10   7  -1   90.33   15.71
  10   7  -1   84.76    8.98
 -10   7   1  111.55   10.11
  10   7  -2  148.16   16.19
  10   7  -2  177.06    9.62
 -10   7   2  159.47   11.83
  10   7  -3  225.06   13.28
  10   7  -3  207.63   17.97
  10   7  -3  270.89   14.48
 -10   7   3  209.43   11.71
  10   7  -4  272.87   19.51
  10   7  -4  257.51    9.52
  10   7  -4  197.42   17.72
 -10   7   4  265.91   13.51
  10   7  -5  220.29    9.51
 -10   7   5  256.70   10.87
  10   7  -5  248.58   21.28
  10   7  -5  221.58   19.57
  10   7  -6  142.50   19.12
 -10   7   6  141.50    9.16
  10   7  -6  126.06   24.78
  10   7  -6  126.91    8.44
  10   7  -7  119.01    9.55
 -10   7   7  123.17    9.27
  10   7  -7  122.81   28.24
  10   8  -2  140.67    9.45
  10   8  -2   66.18   11.91
 -10   8   2  155.85   13.04
  10   8  -2  149.34   17.51
  10   8  -3  260.06   24.28
  10   8  -3  231.84    9.66
 -10   8   3  257.40   14.91
  10   8  -3  188.36   19.29
  10   8  -4  115.53   28.49
  10   8  -4  128.01   26.14
 -10   8   4  209.04   13.84
  10   8  -4  204.73   10.85
 -10   8   5  125.11   10.80
  10   8  -5  141.65    8.70
  10   8  -6  120.71   10.22
 -10   8   6  153.24    9.74
  10   8  -7   82.64    8.68
 -10   8   7   85.77   10.86
 -10   9   3  182.55   14.21
  10   9  -3  135.34    9.71
  10   9  -4  191.24    9.88
 -10   9   4  179.88   12.45
 -10   9   5  199.28   11.63
  10   9  -5  134.48    8.94
  10   9  -6   78.81    8.27
 -10   9   6   77.04   10.48
  -9 -10   0  128.44   10.47
  -9  -9   0  130.35   10.07
   9  -9   0  120.15    8.44
  -9  -9   0  119.28   10.37
   9  -9   0  103.98   11.36
  -9  -8  -1   37.57   11.55
   9  -8   1   36.06    9.99
   9  -8   1   31.35   10.45
  -9  -8  -1   36.08   11.39
  -9  -8   0  142.49   10.36
  -9  -8   0  129.59    9.96
   9  -8   0  152.86   10.10
   9  -8   0  140.83   11.52
   9  -7   1  112.23   10.58
   9  -7   1  115.97    8.67
  -9  -7  -1  116.35   10.09
  -9  -7  -1   90.61   10.32
   9  -7   0   78.37    8.18
  -9  -7   0   65.53    9.43
   9  -7   0   73.99   11.33
  -9  -7   0   61.99   10.26
   9  -6   2  137.83    9.44
  -9  -6  -2  123.08   11.13
  -9  -6  -2  148.85   10.82
   9  -6   2  105.19   12.82
  -9  -6  -1   92.84   10.29
  -9  -6  -1   91.49    9.28
   9  -6   1   48.95   10.47
   9  -6   1   67.10    8.54
   9  -6   0  256.33    9.23
  -9  -6   0  241.17   10.59
  -9  -6   0  279.92   11.11
   9  -6   0  224.46   10.32
   9  -5   2  147.71    9.10
   9  -5   2  137.88   11.50
  -9  -5  -2  112.84   10.15
  -9  -5  -2  125.76   10.38
  -9  -5  -1  299.72   10.51
   9  -5   1  283.84   10.23
   9  -5   1  302.50   12.16
  -9  -5  -1  297.85   11.41
  -9  -5   0  165.21    9.11
   9  -5   0  141.65    9.34
  -9  -5   0  179.76    9.63
   9  -5   0  128.66    8.63
  -9  -4  -2  265.06   12.06
   9  -4   2  225.39   12.52
   9  -4   2  194.96   11.47
  -9  -4  -2  197.63   11.18
   9  -4   1  116.55   11.98
  -9  -4  -1  125.59   10.12
   9  -4   1  141.84   11.77
  -9  -4  -1  142.08    9.85
   9  -4   0  248.26    8.52
  -9  -4   0  219.55    9.59
   9  -4   0  230.02   10.44
  -9  -4   0  252.89    9.75
  -9  -3  -2   95.52   10.08
   9  -3   2   99.46   10.13
   9  -3   2  139.12   10.07
  -9  -3  -2  136.03   10.50
   9  -3   1  256.23   12.26
  -9  -3  -1  253.75   11.06
  -9  -3  -1  260.09   10.49
   9  -3   1  244.22    9.50
   9  -3   0  158.63    8.08
  -9  -3   0  194.72    9.88
   9  -3   0  228.88    8.67
  -9  -3   0  209.88    9.46
  -9  -2  -2  148.22   10.21
  -9  -2  -2  119.30   11.06
   9  -2   2  111.54   10.43
   9  -2   2  106.50   13.17
   9  -2   1  107.22    8.86
   9  -2   1   82.47    8.71
  -9  -2  -1  128.18   11.77
  -9  -2  -1  104.67   10.71
  -9  -2   0  475.39   11.35
   9  -2   0  416.42   10.19
   9  -2   0  404.05    9.73
  -9  -2   0  427.42   11.53
  -9  -1  -2   46.57    9.63
  -9  -1  -2   41.79   11.57
   9  -1   2   55.99   10.61
   9  -1   2   49.73    9.60
  -9  -1  -1  131.75   10.86
  -9  -1  -1  162.31   10.39
   9  -1   1  137.35    8.91
   9  -1   1  163.86   10.21
  -9  -1   0  312.05   12.74
  -9  -1   0  357.35   10.24
   9  -1   0  295.76   12.02
   9  -1   0  333.97   10.59
  -9   0  -2  228.55   16.56
  -9   0  -2  158.98    9.86
  -9   0  -1  108.86   11.88
  -9   0  -1   82.77   10.17
  -9   0   0  454.19   11.88
  -9   0   0  456.41   10.60
  -9   0   1  169.33    9.82
  -9   0   1  173.35    8.62
  -9   0   2  156.70    8.84
  -9   0   2  158.00    7.89
  -9   0   3  234.85    9.30
  -9   0   4  322.20   11.87
  -9   0   5  149.71    7.89
  -9   0   6   42.18    8.16
  -9   0   7   57.55    7.88
  -9   0   8  348.90    9.51
  -9   0   9    4.10    9.92
  -9   0  10  213.20    9.33
   9   1  -1  340.92   11.72
  -9   1   1  388.50   10.24
   9   1  -1  346.14    8.99
  -9   1   1  380.08   14.48
  -9   1   2  202.84   12.66
   9   1  -2  201.33    8.05
   9   1  -2  202.26    8.46
  -9   1   2  200.05    8.76
   9   1  -3  368.07    9.54
  -9   1   3  353.82    9.78
   9   1  -3  349.43    8.91
   9   1  -4  246.32    8.92
   9   1  -4  311.97    9.22
  -9   1   4  234.46    8.88
   9   1  -4  239.48    8.03
   9   1  -5  149.47    8.42
   9   1  -5  158.94    8.74
   9   1  -5  119.48    7.39
  -9   1   5  168.61   10.69
  -9   1   6  101.58    7.22
   9   1  -6  123.15    7.71
   9   1  -6  111.40    8.70
   9   1  -6   86.22    7.93
   9   1  -7  190.30    8.27
   9   1  -7  166.38   10.41
   9   1  -7  211.53   10.39
  -9   1   7  206.60   10.32
   9   1  -8   41.49    9.67
  -9   1   8   26.83    7.84
   9   1  -8   46.95    7.59
   9   1  -8   43.03    8.21
   9   1  -9  165.13    9.94
  -9   1   9  192.97    8.51
   9   1  -9  186.37    9.40
   9   1  -9  169.50   11.00
   9   1 -10   93.89    8.88
  -9   1  10  103.15    8.83
   9   1 -10  113.55   14.46
   9   1 -10  136.86   11.91
   9   2  -1  220.60    9.58
  -9   2   1  272.11   10.45
  -9   2   1  285.75   12.08
   9   2  -1  227.39    8.23
  -9   2   2  217.65    9.85
  -9   2   2  223.79   10.17
   9   2  -2  184.68    8.97
   9   2  -2  222.69    8.12
  -9   2   3  217.94   10.69
   9   2  -3  246.49    8.94
   9   2  -3  232.24    7.91
   9   2  -4  163.37    8.87
  -9   2   4  315.65    9.69
   9   2  -4  356.06    9.91
   9   2  -4  303.04    8.32
  -9   2   5  160.75    8.18
   9   2  -5  176.99   10.24
   9   2  -5  175.03   10.33
   9   2  -5  185.79    9.20
   9   2  -6  170.50    8.11
   9   2  -6  215.95   10.02
   9   2  -6  225.72    9.19
  -9   2   6  194.19    9.68
   9   2  -7  195.21    8.64
   9   2  -7  280.95   10.58
  -9   2   7  232.76    9.51
   9   2  -7  282.21   10.31
   9   2  -8  293.27    9.89
   9   2  -8  249.54    9.51
   9   2  -8  301.83   13.96
  -9   2   8  285.56    9.05
  -9   2   9  105.42    8.65
   9   2  -9   92.89    8.91
   9   2  -9   86.72   14.24
   9   2  -9   89.61    8.94
   9   2 -10  122.25   10.09
   9   2 -10  118.51   11.98
  -9   2  10   91.29    8.98
   9   2 -10   42.38    8.93
   9   3  -1  180.32    8.08
  -9   3   1  219.37   13.98
  -9   3   1  187.18    8.22
   9   3  -1  162.02    9.12
  -9   3   2  271.46    9.87
  -9   3   2  298.58    9.03
   9   3  -2  273.75    9.59
   9   3  -2  254.32    8.03
   9   3  -3  331.55    9.68
  -9   3   3  348.97    9.99
   9   3  -3  342.48    8.20
  -9   3   4  340.45   12.12
   9   3  -4  336.90    8.55
   9   3  -4  341.49    9.68
   9   3  -5  362.75   12.45
   9   3  -5  291.50    8.65
  -9   3   5  305.43    9.10
   9   3  -6  161.08    9.04
  -9   3   6  118.88    8.02
   9   3  -6  125.48    7.56
  -9   3   7  331.86   10.00
   9   3  -7  302.87    9.40
   9   3  -7  381.52   10.09
   9   3  -8  127.02    8.57
   9   3  -8  185.76    9.72
  -9   3   8  128.49    8.40
   9   3  -9   97.41    9.01
  -9   3   9   99.13    8.46
   9   3  -9   78.65    8.66
   9   3  -9   89.38   14.17
   9   3 -10  152.40   13.48
   9   3 -10  142.73    9.86
   9   3 -10  183.22    9.92
  -9   3  10  140.73    8.98
   9   4  -1  304.20   10.77
   9   4  -1  318.33   13.00
  -9   4   1  336.35   10.76
  -9   4   1  386.21   10.54
   9   4  -2  169.28    8.26
  -9   4   2  159.90    9.60
  -9   4   2  163.09   12.24
   9   4  -2  187.76    9.02
   9   4  -3  230.95   11.18
  -9   4   3  257.18   11.60
   9   4  -3  273.29    8.69
   9   4  -4  233.11    8.52
   9   4  -4  316.78   11.45
   9   4  -4  300.82   11.09
  -9   4   4  282.95   10.81
   9   4  -5  289.82   11.94
  -9   4   5  238.41   10.41
   9   4  -5  237.65    8.02
   9   4  -5  289.65   10.27
   9   4  -6  251.73    8.65
  -9   4   6  248.54    8.36
   9   4  -6  293.62   11.72
   9   4  -6  294.93   10.26
   9   4  -7  130.41   11.39
   9   4  -7  112.14    8.70
   9   4  -7  118.49    9.15
  -9   4   7   96.21    8.23
  -9   4   8  166.19    8.55
   9   4  -8  133.41    8.71
   9   4  -8  153.56    8.86
   9   4  -8  172.82   12.17
   9   4  -9   96.13   11.44
   9   4  -9  109.38   10.22
  -9   4   9  114.26    8.84
   9   4  -9   99.48   14.94
  -9   4  10   93.88   12.29
   9   4 -10   84.89    9.70
   9   4 -10  120.33   10.78
  -9   5   1  311.83    8.59
  -9   5   1  261.17   10.82
   9   5  -1  271.02   12.07
   9   5  -1  317.25   12.06
  -9   5   2  183.82    9.75
   9   5  -2  178.89   10.41
   9   5  -2  163.84   10.93
  -9   5   2  182.37    7.95
   9   5  -3  149.26   10.32
   9   5  -3  187.31    8.70
   9   5  -3  234.75   10.98
  -9   5   3  189.42   11.21
   9   5  -4   90.13   11.43
   9   5  -4  298.16   13.03
  -9   5   4  289.90   11.53
   9   5  -4  275.93    8.42
   9   5  -5  168.73    9.44
   9   5  -5  184.57    9.81
   9   5  -5  232.17   13.94
  -9   5   5  182.48    8.74
  -9   5   6   86.37    7.93
   9   5  -6   65.15   11.16
   9   5  -6   95.84    9.68
   9   5  -6  114.07    9.49
   9   5  -7  114.30    8.04
   9   5  -7  141.18   13.96
   9   5  -7  140.69    9.39
  -9   5   7  108.57    9.67
   9   5  -8  114.58   14.69
  -9   5   8   98.24   11.57
   9   5  -8   86.28   10.26
   9   5  -8   79.70    8.43
   9   5  -9  141.54   16.29
  -9   5   9  170.56   10.47
   9   5  -9  128.77    9.51
   9   5  -9  145.37    9.57
   9   6  -1  149.43   11.32
  -9   6   1  164.84   11.36
   9   6  -1  158.07   12.34
  -9   6   1  149.51    9.01
  -9   6   2  276.71   10.48
   9   6  -2  287.11   15.76
  -9   6   2  288.47   10.43
   9   6  -2  333.89   11.48
   9   6  -3   40.01   10.27
   9   6  -3   59.33    7.95
  -9   6   3   67.53    8.97
   9   6  -3   65.27   13.10
  -9   6   4  137.86   10.93
   9   6  -4  134.59    7.76
   9   6  -4  124.14   10.69
   9   6  -4  143.96   13.84
   9   6  -5  155.85   12.25
   9   6  -5  179.86    8.44
  -9   6   5  180.03    9.44
   9   6  -5  207.33   13.84
   9   6  -6  224.51   12.05
   9   6  -6  156.97   14.03
  -9   6   6  189.38    9.03
   9   6  -6  187.67    8.70
  -9   6   7   99.21    7.69
   9   6  -7  108.58   11.11
   9   6  -7  121.95    8.13
   9   6  -7  154.45   21.76
  -9   6   8   64.49    8.10
   9   6  -8   90.08   12.33
   9   6  -8   98.15   17.45
   9   6  -8   84.62    8.56
   9   6  -9   41.47    8.28
   9   6  -9   83.26   21.01
  -9   6   9   39.61    8.23
   9   6  -9   67.77   10.85
  -9   7   1  313.51    9.16
   9   7  -1  326.55   16.88
   9   7  -1  341.01   13.03
   9   7  -2   56.14   15.55
   9   7  -2   55.92    8.38
  -9   7   2   38.81    8.72
  -9   7   2   68.82    9.97
   9   7  -3  307.67   18.86
   9   7  -3  309.24    9.32
   9   7  -3  333.22   15.80
  -9   7   3  300.31   10.90
   9   7  -4   94.64    8.17
   9   7  -4  104.55   15.36
   9   7  -4  116.04   14.38
  -9   7   4   71.39    9.28
   9   7  -5  203.65   20.58
   9   7  -5  184.59   17.70
   9   7  -5  217.73   10.16
  -9   7   5  206.74    9.78
   9   7  -6   69.07   13.94
   9   7  -6  107.74    9.88
   9   7  -6   99.44   25.15
  -9   7   6  105.99    8.92
   9   7  -7  166.12   15.75
   9   7  -7  167.91    8.25
  -9   7   7  141.08    8.46
   9   7  -7  132.28   24.89
  -9   7   8  120.20   11.57
   9   7  -8  118.41    8.63
   9   7  -8  109.66   23.34
   9   7  -8   88.85   11.44
   9   7  -9  176.77   25.19
  -9   7   9  149.49    8.70
   9   7  -9  175.46   10.19
   9   7  -9  136.68   12.42
   9   8  -1  161.62   18.39
  -9   8   1  147.03    8.20
   9   8  -1  166.81   11.20
   9   8  -2  269.81   20.56
   9   8  -2  239.74    9.52
  -9   8   2  233.33   13.33
   9   8  -2  124.05   12.33
   9   8  -3  147.67   21.71
   9   8  -3  170.79   10.33
  -9   8   3  153.89   10.85
   9   8  -3  145.97   18.61
  -9   8   4  300.26   11.00
   9   8  -4  316.33    9.28
   9   8  -5  144.95    8.57
  -9   8   5  145.41   11.61
  -9   8   6  329.98   10.86
   9   8  -6  338.18    9.76
   9   8  -7   65.07    8.21
  -9   8   7   72.82   10.39
  -9   8   8   98.43    9.00
   9   8  -8  122.33    9.53
  -9   9   1  189.07   19.10
   9   9  -1  144.16   11.30
   9   9  -1  148.85   20.14
  -9   9   1  150.54    8.88
   9   9  -2  127.48   18.28
   9   9  -2  210.86   25.73
   9   9  -2  270.33   10.31
   9   9  -3  285.68    9.98
  -9   9   3  324.41   17.71
  -9   9   4  118.43   13.33
   9   9  -4  146.76   11.84
  -9   9   5  134.43   12.61
   9   9  -5  110.29   10.25
   9   9  -6   66.85    8.40
  -9   9   6   71.38   10.02
  -9   9   7  161.73    9.75
   9   9  -7  181.74    9.69
  -9   9   8   92.31    9.12
   9   9  -8   89.93    9.16
   9  10  -1  248.66   29.73
   9  10  -1  198.47    9.66
  -9  10   1  307.98   19.05
  -9  10   1  216.35    9.01
  -9  10   2  168.78   16.30
   9  10  -2  150.99   10.23
  -9  10   3  202.11   14.26
   9  10  -3  220.88    9.91
  -9  10   4   83.77   11.83
   9  10  -4  100.19    9.42
  -9  10   5   64.11   11.32
   9  10  -5  110.08    8.36
  -9  10   6   76.64    9.95
   9  10  -6  107.35    9.26
   9  10  -7  128.79    9.63
  -9  10   7  102.58    9.48
  -9  11   1  163.74   19.89
  -9  11   2  190.07   18.64
   9  11  -2  196.16   11.76
  -9  11   3   47.86   14.80
   9  11  -3   65.64    9.72
  -9  11   4  132.08   16.00
   9  11  -4  128.17    9.13
   9  11  -5   59.42   12.54
  -9  11   5   58.08   11.90
  -9  11   6  128.94   12.12
   9  11  -6  157.25    9.96
  -9  12   4  146.17   15.70
   9  12  -4  119.67    9.86
  -8 -12   0   24.89    9.60
   8 -12   0   21.29    8.10
   8 -12   0   17.68   12.47
  -8 -12   0   15.37   15.01
   8 -11   1   30.43    9.88
  -8 -11  -1   33.96    9.43
  -8 -11  -1   20.94   10.91
   8 -11   0  173.49   12.37
  -8 -11   0  229.67   15.42
   8 -11   0  234.12    9.23
  -8 -11   0  249.61   10.20
  -8 -10  -2   54.53    9.92
   8 -10   2   33.06   10.11
  -8 -10  -2   44.85    9.82
  -8 -10  -1  290.59   11.43
  -8 -10  -1  307.61   13.37
   8 -10   1  285.15   10.90
   8 -10   0   31.64   11.67
  -8 -10   0   54.57   11.79
   8 -10   0   29.50    7.61
  -8 -10   0   81.95    9.67
  -8  -9  -2   95.00    9.81
  -8  -9  -2   94.62   11.19
   8  -9   2   99.13    8.31
  -8  -9  -1   68.17   11.99
  -8  -9  -1   68.34    9.73
   8  -9   1   67.64   13.72
   8  -9   1   44.11    9.70
   8  -9   0  323.47    9.35
  -8  -9   0  319.19   11.74
   8  -9   0  276.18   11.11
  -8  -9   0  315.09   10.30
   8  -8   2   30.30   13.10
  -8  -8  -2   58.07    9.26
   8  -8   2   18.03    7.87
  -8  -8  -2    9.49   11.64
  -8  -8  -1  170.48   10.24
  -8  -8  -1  197.66   11.00
   8  -8   1  187.43   13.83
   8  -8   1  176.01    8.27
  -8  -8   0   82.92    9.35
   8  -8   0   84.55    9.54
   8  -8   0   99.09   11.12
  -8  -8   0   86.18    9.65
  -8  -7  -3   37.31    9.75
   8  -7   3   42.47   10.26
  -8  -7  -3   70.22   12.19
  -8  -7  -2  134.89   12.12
   8  -7   2   86.66   13.95
  -8  -7  -2   73.62   11.99
   8  -7   2   88.95    8.53
   8  -7   1  157.17   12.32
  -8  -7  -1  156.43   10.54
  -8  -7  -1  132.31   12.00
   8  -7   1  120.24    7.77
   8  -7   0  360.91    9.32
   8  -7   0  311.51   10.47
  -8  -7   0  386.41   11.67
  -8  -7   0  377.68   11.34
   8  -6   3  264.95    9.88
  -8  -6  -3  228.80   10.93
  -8  -6  -3  274.75   11.95
  -8  -6  -2  125.86    9.97
   8  -6   2  100.61   11.46
   8  -6   2  102.01    8.15
  -8  -6  -2   85.65    9.16
   8  -6   1  337.68   12.27
  -8  -6  -1  386.39   11.18
  -8  -6  -1  311.07   10.31
   8  -6   1  254.63    9.15
  -8  -6   0  138.55    9.09
   8  -6   0  144.53    9.89
   8  -6   0  177.91    8.18
  -8  -6   0  180.38   10.17
   8  -5   3   82.77   10.63
  -8  -5  -3   80.44   11.71
  -8  -5  -3   81.95   12.61
   8  -5   2  434.40   12.12
  -8  -5  -2  505.81   12.12
   8  -5   2  508.38   13.55
  -8  -5  -2  459.87   13.11
  -8  -5  -1   57.98    8.93
  -8  -5  -1  111.03    8.96
   8  -5   1   79.96    8.03
   8  -5   1   80.20    9.13
   8  -5   0  329.84    8.15
  -8  -5   0  387.83    9.76
   8  -5   0  315.79   10.09
  -8  -5   0  370.94   11.46
  -8  -4  -4   38.90   10.90
   8  -4   4   42.25    9.97
  -8  -4  -4   67.78   10.52
  -8  -4  -3  385.04   12.34
   8  -4   3  313.69   11.17
   8  -4   3  377.97   15.24
  -8  -4  -3  383.42   11.60
  -8  -4  -2   50.70    9.37
   8  -4   2   52.49   11.62
  -8  -4  -2    9.17    9.99
   8  -4   2   51.05    9.08
  -8  -4  -1  493.75   13.05
  -8  -4  -1  382.33   13.24
   8  -4   1  466.45    9.76
   8  -4   1  370.66   10.13
   8  -4   0   96.53    8.87
   8  -4   0  103.00    7.25
  -8  -4   0  137.97    9.00
  -8  -4   0  107.20   11.14
  -8  -3  -4  161.74   10.18
   8  -3   4  151.48   10.05
  -8  -3  -4  124.09   13.30
   8  -3   3   73.36    9.39
  -8  -3  -3   94.80   10.43
   8  -3   3   64.64   10.24
  -8  -3  -3   78.05   10.35
  -8  -3  -2  302.98   11.53
  -8  -3  -2  325.74   10.82
   8  -3   2  276.68   10.88
   8  -3   2  284.49    9.38
  -8  -3  -1   50.99    8.80
   8  -3   1   23.89    7.20
  -8  -3  -1   34.45   10.82
   8  -3   1   24.23    7.39
   8  -3   0  334.26    9.78
  -8  -3   0  316.16    9.94
  -8  -3   0  384.08    9.73
   8  -3   0  376.76    9.08
  -8  -2  -4   53.00   13.00
  -8  -2  -4   25.21    9.81
   8  -2   4   26.62    9.54
   8  -2   3  237.61    9.96
  -8  -2  -3  197.87   11.04
   8  -2   3  192.07   11.03
  -8  -2  -3  205.38   10.64
  -8  -2  -2   86.53    9.84
  -8  -2  -2   90.16    9.84
   8  -2   2   99.68    8.99
   8  -2   2   80.21    8.46
  -8  -2  -1  252.22    9.53
   8  -2   1  175.61    8.66
  -8  -2  -1  214.72   11.93
   8  -2   1  207.71    9.07
   8  -2   0  125.97    7.07
   8  -2   0  151.45    8.13
  -8  -2   0  127.93    9.30
  -8  -2   0  152.47    8.21
  -8  -1  -4  122.76   12.17
   8  -1   4  141.12   11.21
  -8  -1  -4  166.82   10.67
  -8  -1  -3  102.05   13.00
   8  -1   3  111.48   10.12
  -8  -1  -3  125.53   10.18
   8  -1   3  108.21    9.62
  -8  -1  -2  407.44   15.41
   8  -1   2  341.79   10.21
   8  -1   2  385.93   10.16
  -8  -1  -2  394.18   11.50
  -8  -1  -1  162.22   10.10
  -8  -1  -1  209.88    9.85
   8  -1   1  159.45    9.00
   8  -1   1  173.46    8.33
   8  -1   0  357.83    9.85
   8  -1   0  386.41    9.79
  -8  -1   0  381.57   10.07
  -8  -1   0  421.67   11.40
  -8   0  -4   28.52    9.98
  -8   0  -4    7.00   11.88
  -8   0  -3  295.71   10.00
  -8   0  -3  305.29   12.19
  -8   0  -2  142.78   10.69
  -8   0  -2  123.40   11.40
  -8   0  -1  344.31   11.88
  -8   0  -1  341.39   13.29
  -8   0   0  396.31    9.19
  -8   0   0  366.83    9.87
  -8   0   1  304.12   11.53
  -8   0   1  260.99    7.91
  -8   0   2   11.27    6.55
  -8   0   2   -2.68    7.78
  -8   0   3  277.87    9.02
  -8   0   4  323.84    8.52
  -8   0   5  313.79    9.20
  -8   0   6   68.55    7.66
  -8   0   7  327.74    9.19
  -8   0   8   11.21    8.07
  -8   0   9  124.56    9.02
  -8   0  10   29.41    8.46
  -8   0  11  141.98    9.03
   8   1  -1   76.87    9.20
   8   1  -1   69.63    7.39
  -8   1   1   68.96    7.86
  -8   1   1   77.35    7.27
   8   1  -2  437.87    9.49
  -8   1   2  488.29    9.87
  -8   1   2  495.55    8.79
   8   1  -2  563.56   12.67
  -8   1   3  186.04    8.42
   8   1  -3  194.36    8.44
   8   1  -3  195.57   10.56
  -8   1   4  509.59   10.09
   8   1  -4  362.71    9.54
   8   1  -4  499.92    9.26
   8   1  -4  654.67   12.17
  -8   1   5   85.73    7.53
   8   1  -5  100.74    8.11
   8   1  -5   95.88    9.41
   8   1  -5  110.43    7.59
   8   1  -6  415.60   11.73
   8   1  -6  412.26    9.23
  -8   1   6  419.60    9.45
   8   1  -6  490.88   11.81
  -8   1   7  126.63   10.21
   8   1  -7  133.04    9.25
   8   1  -7  145.31    7.49
   8   1  -7  176.76    9.77
   8   1  -8  335.12    9.90
  -8   1   8  376.39    9.13
   8   1  -8  339.52    9.90
   8   1  -8  411.10   11.41
   8   1  -9   39.80    8.67
  -8   1   9   38.67    7.92
   8   1  -9   35.91    8.47
   8   1  -9   42.92    8.09
   8   1 -10  223.37   11.21
   8   1 -10  175.32    9.49
  -8   1  10  185.30    9.37
   8   1 -10  243.99   10.47
   8   1 -11   61.37   12.33
   8   1 -11   33.50    9.56
  -8   1  11   29.03    8.84
  -8   2   1  606.83   11.20
  -8   2   1  629.22   12.66
   8   2  -1  605.36   12.18
   8   2  -1  531.85   10.13
  -8   2   2   74.93    7.30
  -8   2   2   80.88    6.59
   8   2  -2   58.15    7.44
   8   2  -2   75.33    9.67
   8   2  -3  911.67   11.47
   8   2  -3 1098.31   13.46
  -8   2   3  977.20   12.68
   8   2  -4   66.87    7.72
  -8   2   4   79.27    7.74
   8   2  -4   66.34   10.99
   8   2  -4   52.18    7.50
  -8   2   5  665.04   12.49
   8   2  -5  741.04   14.50
   8   2  -5  699.18   10.16
   8   2  -5  783.50   12.00
   8   2  -6  152.49    9.37
   8   2  -6  143.12    7.95
   8   2  -6  142.17    8.35
  -8   2   6  170.50    7.85
  -8   2   7  456.75    9.65
   8   2  -7  482.11   11.52
   8   2  -7  467.89    9.56
   8   2  -7  565.52   12.01
   8   2  -8   41.22    9.35
   8   2  -8   64.84    7.43
  -8   2   8   58.77    9.48
   8   2  -8   58.47   10.67
  -8   2   9  280.05    8.95
   8   2  -9  337.42   11.95
   8   2  -9  231.85    9.10
   8   2  -9  299.02   12.98
   8   2 -10  116.12    9.69
  -8   2  10  145.95    9.10
   8   2 -10  202.04   12.41
   8   2 -10  177.57   11.27
  -8   3   1  110.92    7.43
  -8   3   1   81.08    8.31
   8   3  -1   59.88    8.17
   8   3  -1   71.43    7.82
   8   3  -2  929.42   13.35
  -8   3   2  965.63   12.99
  -8   3   2 1032.44   14.23
   8   3  -2  741.67   11.53
  -8   3   3  219.67    8.04
   8   3  -3  220.80    9.04
   8   3  -3  201.98    7.52
   8   3  -4  880.45   10.75
  -8   3   4  931.27   13.07
   8   3  -4 1098.61   13.85
   8   3  -5   39.79    8.92
   8   3  -5   66.93    7.85
  -8   3   5   38.36    7.76
   8   3  -6  686.63   10.55
   8   3  -6  859.51   13.17
  -8   3   6  726.28   11.44
   8   3  -7   79.19    9.93
   8   3  -7   62.69    8.95
  -8   3   7   77.86    7.55
   8   3  -8  510.23   10.56
   8   3  -8  481.71   14.46
  -8   3   8  508.24   10.10
   8   3  -8  569.70   11.51
   8   3  -9   94.53    7.99
  -8   3   9  103.50    8.18
   8   3  -9  103.56   13.29
   8   3  -9   89.93    9.65
   8   3 -10  177.89   10.21
   8   3 -10  289.73   10.57
  -8   3  10  218.23    9.39
   8   3 -10  252.03   12.91
  -8   4   1  252.82    9.23
   8   4  -1  258.20    8.76
   8   4  -1  232.97   10.85
  -8   4   1  242.28    8.34
   8   4  -2  175.23    8.25
  -8   4   2  175.51    7.88
  -8   4   2  163.57    8.50
   8   4  -2  203.76   11.26
   8   4  -3  841.71   13.99
   8   4  -3  922.55   12.54
  -8   4   3  945.36   14.03
   8   4  -3  969.99   13.68
   8   4  -4  168.61    8.56
   8   4  -4  137.27    7.49
  -8   4   4  154.69    8.02
   8   4  -4  190.07    9.62
   8   4  -5  460.99    9.15
   8   4  -5  564.10   12.38
   8   4  -5  539.07   12.70
  -8   4   5  451.96    9.65
   8   4  -6   71.19    7.63
  -8   4   6   39.93    7.58
   8   4  -6   74.58    8.57
   8   4  -6   63.99    7.01
   8   4  -7  599.74   16.52
   8   4  -7  527.21    9.69
  -8   4   7  502.33    9.60
   8   4  -7  604.12   11.83
   8   4  -8   95.41   11.46
   8   4  -8   81.17    8.63
   8   4  -8   90.76    9.52
  -8   4   8   62.94    8.45
   8   4  -9  385.73   11.62
  -8   4   9  261.16    9.24
   8   4  -9  286.05   11.44
  -8   4  10   86.19    8.96
   8   4 -10  121.86   12.13
   8   4 -10  119.82   14.50
   8   4 -10  107.47    9.71
   8   5  -1  115.93   10.41
  -8   5   1  124.37    9.38
  -8   5   1  116.84    9.08
   8   5  -1  131.57    7.92
   8   5  -2  298.77   12.56
   8   5  -2  279.97    8.71
  -8   5   2  251.21    8.46
  -8   5   2  310.54    9.45
   8   5  -3  172.25    8.16
   8   5  -3  180.50   12.09
  -8   5   3  181.98    8.21
   8   5  -3  165.26   11.71
   8   5  -4  397.46   13.42
   8   5  -4  318.21    8.60
  -8   5   4  311.74    8.97
   8   5  -4  365.22   13.03
   8   5  -5   53.07    9.56
   8   5  -5   40.44    8.56
  -8   5   5   45.95    7.58
   8   5  -5   46.74    7.01
   8   5  -6  370.30   15.63
  -8   5   6  357.76    9.25
   8   5  -6  393.34   10.87
   8   5  -6  418.84   12.31
   8   5  -7  139.56    8.86
  -8   5   7  120.72    9.18
   8   5  -7  141.49   13.14
   8   5  -7  138.63    7.66
   8   5  -8  408.75   17.50
   8   5  -8  369.98   12.25
   8   5  -8  283.61    9.08
  -8   5   8  280.03    9.52
   8   5  -9   39.70    8.84
   8   5  -9   35.24    8.41
   8   5  -9   71.18   17.63
  -8   5   9   58.77    7.86
  -8   5  10   87.37    8.67
   8   5 -10  164.01   20.21
   8   5 -10  166.58   10.89
   8   5 -10  135.72    9.70
   8   6  -1  283.49    8.72
  -8   6   1  307.23    8.02
  -8   6   1  354.63   11.26
   8   6  -1  321.98   15.55
   8   6  -2   74.65    7.79
  -8   6   2   74.71   10.29
  -8   6   2   90.84    7.28
   8   6  -2   74.17   12.32
   8   6  -3  181.70   11.14
  -8   6   3  223.82   10.64
   8   6  -3  204.06   10.53
   8   6  -3  192.04   12.90
  -8   6   4   15.75    7.54
   8   6  -4   29.54   10.86
   8   6  -4   25.37   10.66
   8   6  -4   29.83    7.28
   8   6  -5  442.55   13.51
  -8   6   5  392.61   10.37
   8   6  -5  509.75   17.26
   8   6  -5  397.27    8.65
   8   6  -6   48.46   13.41
   8   6  -6   32.95    6.66
  -8   6   6   29.44    7.45
   8   6  -6   48.94   10.22
   8   6  -7  146.50    8.01
   8   6  -7  179.19    9.37
   8   6  -7  254.93   19.55
  -8   6   7  150.62    8.16
   8   6  -8   74.90   10.25
  -8   6   8   81.63    8.28
   8   6  -8   72.53    8.28
   8   6  -8  119.29   16.14
   8   6  -9  180.78   10.05
   8   6  -9  223.91   11.66
  -8   6   9  180.77    8.97
   8   6  -9  277.29   19.08
   8   6 -10   33.22   16.46
  -8   6  10   23.31    8.03
   8   6 -10    9.83    9.39
   8   6 -10   23.99   10.43
  -8   7   1   48.06    7.67
   8   7  -1   43.12   14.59
   8   7  -1   21.15   11.46
   8   7  -2  174.84   15.55
  -8   7   2  182.43    7.41
  -8   7   2  180.94   12.08
   8   7  -2  144.56    8.32
   8   7  -3   31.97   11.54
   8   7  -3   30.40   10.91
   8   7  -3   30.70    7.84
  -8   7   3   18.77    8.23
  -8   7   4  297.12   11.91
   8   7  -4  307.66   18.57
   8   7  -4  270.41   16.56
   8   7  -4  315.44    8.43
   8   7  -5   29.96   16.51
   8   7  -5   38.56    6.50
   8   7  -5   28.52   13.75
  -8   7   5   12.87    8.04
  -8   7   6  418.44    9.91
   8   7  -6  420.04   27.49
   8   7  -6  383.93    8.82
   8   7  -6  389.98   16.50
  -8   7   7   87.21    7.75
   8   7  -7  101.52   20.26
   8   7  -7   73.98    7.46
   8   7  -7   88.52   10.76
   8   7  -8  302.89   10.19
  -8   7   8  257.51    9.37
   8   7  -8  318.51   13.15
   8   7  -8  388.30   26.42
   8   7  -9   23.99   10.96
   8   7  -9   79.09   24.47
  -8   7   9   46.72    8.11
   8   7  -9   32.27   10.18
  -8   7  10   78.09    9.99
   8   7 -10  112.02    9.92
  -8   8   1  218.38    8.71
   8   8  -1  252.83   15.75
   8   8  -1  249.58    9.26
   8   8  -2   11.80    8.23
  -8   8   2   69.19   11.49
   8   8  -2   32.40   19.60
   8   8  -3  396.95   28.50
   8   8  -3  397.60   23.08
   8   8  -3  362.75    9.80
  -8   8   3  316.73   11.51
   8   8  -4   62.09    7.61
  -8   8   4   75.25    9.12
   8   8  -5  461.76    9.44
  -8   8   5  497.66   13.38
   8   8  -6   27.27    7.28
  -8   8   6   14.82    8.21
   8   8  -7  430.79   10.14
  -8   8   7  334.56    9.43
   8   8  -8   23.16   18.25
   8   8  -8   62.75   10.80
  -8   8   8   31.54    7.93
   8   8  -9  172.20   11.99
   8   8  -9  132.71   12.78
   8   8  -9  199.17   23.78
  -8   8   9  143.56    9.08
   8   9  -1  146.71   20.44
  -8   9   1  170.91   15.01
  -8   9   1  132.71    7.62
   8   9  -1  100.65    8.77
   8   9  -2  244.88   26.89
  -8   9   2  397.87   16.45
   8   9  -2  213.41   19.00
   8   9  -2  337.34   10.29
   8   9  -3   95.24    9.18
  -8   9   3  101.28   12.53
  -8   9   4  401.14   14.23
   8   9  -4  334.42   10.73
  -8   9   5   83.00    9.66
   8   9  -5   85.91    7.96
  -8   9   6  496.27   12.57
   8   9  -6  526.99   11.81
  -8   9   7   63.63    9.65
   8   9  -7   32.96    8.78
  -8   9   8  227.47    9.80
   8   9  -8  299.44   12.12
   8   9  -9   43.45   10.74
  -8   9   9   38.44   10.92
   8  10  -1  361.61   10.16
  -8  10   1  322.58    9.13
   8  10  -1  485.77   27.42
  -8  10   1  472.44   19.85
   8  10  -2  123.64   11.67
   8  10  -3  398.38   11.00
  -8  10   3  396.94   14.66
  -8  10   4  120.21   10.73
   8  10  -4  115.89    8.28
  -8  10   5  211.11   11.03
   8  10  -5  203.52    8.40
  -8  10   6  155.82   10.42
   8  10  -6  145.87    8.73
   8  10  -7  246.05   11.52
  -8  10   7  197.67    9.56
  -8  10   8   45.57   10.18
   8  10  -8   44.91    9.02
  -8  11   1  249.98   18.20
   8  11  -1  153.32   10.16
  -8  11   2  595.30   19.72
   8  11  -2  457.99   11.28
  -8  11   3   45.91   12.81
   8  11  -3   48.72    9.19
   8  11  -4  262.77   10.54
  -8  11   4  265.78   15.62
   8  11  -5   96.58    8.66
  -8  11   5  126.13   11.14
  -8  11   6  227.45   11.54
   8  11  -6  253.40    9.91
   8  11  -7   68.37   12.24
  -8  11   7   46.75    9.05
  -8  11   8   46.59    9.39
  -8  12   1  108.11   20.37
   8  12  -1   90.84   11.47
   8  12  -2   24.76    9.86
  -8  12   2   32.62   19.06
   8  12  -3  241.86   10.42
   8  12  -4   33.19    8.78
  -8  12   4   34.01   12.71
  -8  12   5  165.17   12.82
   8  12  -5  221.28   12.19
  -8  12   6   52.81   11.47
   8  12  -6   65.47    9.66
   8  12  -7  108.18   12.94
  -8  12   7   96.05    9.97
   8  13  -1   68.72    9.58
  -8  13   1   49.44   16.40
  -8  13   2  144.29   17.44
   8  13  -2  151.01   11.63
   8  13  -3   32.17    9.88
   8  13  -4  288.76   11.07
  -8  13   4  284.43   20.83
  -8  13   5   49.37   15.14
   8  13  -5   25.64    9.57
  -8  13   6  248.66   13.91
   8  13  -6  297.41   13.31
  -7 -14   0  121.83   11.14
   7 -14   0  138.64    8.97
  -7 -13  -1  157.96   14.88
  -7 -13  -1  167.14   10.32
   7 -13   1  198.90    9.26
   7 -13   0   15.77   18.66
   7 -13   0   25.40    7.82
  -7 -13   0   62.36    9.02
   7 -12   2  173.24    8.76
  -7 -12  -2  154.37   13.57
  -7 -12  -2  163.37   11.72
   7 -12   1   65.41    7.82
  -7 -12  -1   63.35   11.04
  -7 -12  -1   25.85   11.28
   7 -12   0  142.70    8.37
  -7 -12   0  162.57    9.68
   7 -12   0  162.68   14.00
   7 -11   2    5.82    7.89
  -7 -11  -2   19.56    9.84
  -7 -11  -2   16.93    9.41
  -7 -11  -1  242.14   12.18
  -7 -11  -1  337.27   13.07
   7 -11   1  372.21    9.53
   7 -11   0   83.81    9.77
  -7 -11   0   44.57    8.92
  -7 -11   0   38.67   11.27
   7 -11   0   32.67    8.69
  -7 -10  -3   32.07   11.88
   7 -10   3   49.41    9.87
  -7 -10  -3   19.15   10.60
  -7 -10  -2  266.81   10.67
   7 -10   2  312.40    9.16
  -7 -10  -2  370.39   12.80
   7 -10   1    6.78   13.48
  -7 -10  -1   27.91   10.76
   7 -10   1   43.99    7.72
  -7 -10  -1   21.90   11.16
   7 -10   0  347.88   10.82
  -7 -10   0  366.40   12.39
   7 -10   0  295.01   12.45
  -7 -10   0  375.00   10.59
  -7  -9  -3  121.39   12.44
   7  -9   3  100.24    8.58
  -7  -9  -3  130.04   11.63
  -7  -9  -2   26.45   10.80
   7  -9   2   14.82    7.35
  -7  -9  -2   40.47    9.22
  -7  -9  -1  464.79   13.22
  -7  -9  -1  321.12   10.64
   7  -9   1  402.15    9.34
   7  -9   1  427.05   17.59
   7  -9   0    8.94    8.63
  -7  -9   0    8.25    8.25
  -7  -9   0   41.45    7.82
   7  -9   0    9.83    7.92
   7  -8   4   98.32    9.02
  -7  -8  -4   97.06   10.01
  -7  -8  -4   98.03   12.31
  -7  -8  -4   99.99    9.21
  -7  -8  -3   50.80   11.98
   7  -8   3   29.47    7.77
  -7  -8  -3   35.73    8.88
  -7  -8  -2  237.80   12.70
   7  -8   2  250.41   16.81
  -7  -8  -2  311.82   11.73
   7  -8   2  208.64    8.29
   7  -8   1   22.11    7.01
   7  -8   1    1.97    9.19
  -7  -8  -1   21.13    9.17
  -7  -8  -1   18.71    9.29
  -7  -8   0  249.90   11.69
   7  -8   0  228.35    7.72
   7  -8   0  220.20    8.61
  -7  -8   0  270.63    9.88
  -7  -7  -4   33.52    9.43
  -7  -7  -4   43.29   10.79
   7  -7   4   22.97   10.69
  -7  -7  -3  148.52   12.39
  -7  -7  -3  107.48    8.69
   7  -7   3  114.93    8.76
   7  -7   2   36.66    7.32
  -7  -7  -2   71.10    8.93
  -7  -7  -2   48.14    8.85
   7  -7   2   43.70   14.17
   7  -7   1  456.69   12.76
  -7  -7  -1  525.48   11.98
   7  -7   1  481.98   10.26
  -7  -7  -1  457.90   10.80
  -7  -7   0  -27.17    8.63
   7  -7   0    9.08    6.72
   7  -7   0   -9.50    7.27
  -7  -7   0   28.54    7.87
  -7  -6  -4  247.77   12.17
  -7  -6  -4  354.52   12.38
   7  -6   4  302.56    9.85
  -7  -6  -3   70.65    9.92
  -7  -6  -3   62.16    8.91
   7  -6   3   48.10    8.24
   7  -6   2  463.16   14.07
  -7  -6  -2  415.04   10.69
  -7  -6  -2  510.91   14.49
   7  -6   2  411.66   10.50
  -7  -6  -1    0.70    9.22
   7  -6   1   -0.08    7.58
  -7  -6  -1    0.83    8.36
   7  -6   1    6.20    6.90
   7  -6   0  766.23   10.55
   7  -6   0  650.17   10.84
  -7  -6   0  792.48   13.11
  -7  -6   0  777.94   14.02
  -7  -5  -5  195.54    9.93
  -7  -5  -5  156.87   10.62
   7  -5   5  225.48   14.13
  -7  -5  -5  250.73   11.35
  -7  -5  -4   29.39   10.26
   7  -5   4   44.11   10.98
  -7  -5  -4   22.69    9.52
  -7  -5  -3  423.96   11.42
   7  -5   3  382.05   11.71
  -7  -5  -3  348.24   10.84
   7  -5   2   16.83    9.01
  -7  -5  -2   20.97    8.42
  -7  -5  -2   26.84    8.88
   7  -5   2   14.38    8.00
   7  -5   1  751.76   13.03
   7  -5   1  581.28    9.57
  -7  -5  -1  848.73   12.73
  -7  -5  -1  865.82   13.25
  -7  -5   0   34.54    8.79
   7  -5   0   21.32    6.99
  -7  -5   0   30.87    7.73
   7  -5   0   17.41    6.49
  -7  -4  -5   19.29    9.64
  -7  -4  -5   16.41    8.84
   7  -4   5   19.74    9.74
  -7  -4  -5   23.46   10.21
  -7  -4  -4  353.01   11.82
   7  -4   4  313.38   10.47
  -7  -4  -4  238.17   11.14
  -7  -4  -3    1.63   11.46
  -7  -4  -3   31.93    9.48
   7  -4   3   27.50    8.56
   7  -4   3   11.99    9.87
  -7  -4  -2  374.47   12.77
   7  -4   2  475.85   13.36
  -7  -4  -2  423.34   10.60
   7  -4   2  378.46    9.09
  -7  -4  -1   45.06    8.65
  -7  -4  -1    3.36    8.34
   7  -4   1   -1.83    7.26
   7  -4   1   -9.68    8.17
   7  -4   0  411.83   10.24
   7  -4   0  516.64   11.48
  -7  -4   0  495.92   10.41
  -7  -4   0  517.52   10.46
  -7  -3  -5  160.74   11.50
  -7  -3  -5  160.39   10.64
  -7  -3  -5  157.11   10.35
   7  -3   5  178.35   10.92
  -7  -3  -4    1.33   11.78
  -7  -3  -4   36.38   11.81
   7  -3   4   20.72    9.22
   7  -3   3  251.90   10.40
  -7  -3  -3  243.23   10.71
  -7  -3  -3  247.07   10.51
   7  -3   3  233.97    9.65
   7  -3   2   -2.09    7.55
  -7  -3  -2   41.03   11.16
   7  -3   2    9.18    8.37
  -7  -3  -2    2.55    8.94
  -7  -3  -1  208.38    9.02
   7  -3   1  187.27    8.48
   7  -3   1  197.70    8.62
  -7  -3  -1  157.16    9.37
  -7  -3   0   33.23    7.85
   7  -3   0   23.66    6.32
  -7  -3   0   18.78    8.47
   7  -3   0   37.50    7.34
  -7  -2  -5   43.43   12.48
  -7  -2  -5    0.17   10.74
  -7  -2  -5   31.04    9.57
   7  -2   5   19.07   10.32
  -7  -2  -4  308.11   13.39
   7  -2   4  328.29   11.47
  -7  -2  -4  347.15   11.14
  -7  -2  -3   44.73    9.58
  -7  -2  -3   36.80    9.06
   7  -2   3   61.75    9.41
   7  -2   3   62.31    8.60
  -7  -2  -2  179.29   11.42
  -7  -2  -2  201.30    9.63
   7  -2   2  172.06    9.46
   7  -2   2  186.78    8.86
   7  -2   1   22.23    7.79
   7  -2   1   23.61    9.08
  -7  -2  -1   36.38    7.53
  -7  -2  -1   27.40    7.50
   7  -2   0  751.87   10.43
  -7  -2   0  823.75   13.10
   7  -2   0  847.47   11.22
  -7  -2   0  996.04   12.78
  -7  -1  -5  170.72   12.04
   7  -1   5  180.51   10.58
  -7  -1  -5  191.36   11.29
  -7  -1  -5  131.49   10.40
   7  -1   4   22.84    9.68
  -7  -1  -4   67.83    9.12
  -7  -1  -4   29.52   10.27
  -7  -1  -3  398.74   13.27
   7  -1   3  409.01   10.48
   7  -1   3  420.67   10.82
  -7  -1  -3  460.87   10.84
   7  -1   2    6.80    7.67
   7  -1   2   -4.85    8.39
  -7  -1  -2   29.35    8.55
  -7  -1  -2   -5.20    8.74
  -7  -1  -1  721.13   11.14
  -7  -1  -1  619.59   10.90
   7  -1   1  633.66   10.74
   7  -1   1  649.49   13.85
  -7  -1   0   86.73    8.11
  -7  -1   0   83.83    8.01
   7  -1   0   63.34    7.30
   7  -1   0   67.93    6.85
  -7   0  -5   13.30    9.38
  -7   0  -5   36.32   13.16
  -7   0  -5   30.01   10.35
  -7   0  -4  345.83   12.14
  -7   0  -4  377.33   13.32
  -7   0  -3  115.15    9.93
  -7   0  -3  111.92   10.57
  -7   0  -2  867.66   12.74
  -7   0  -2  821.44   15.43
  -7   0  -1  135.74    9.60
  -7   0  -1  106.71    8.79
  -7   0   0 1168.47   13.92
  -7   0   0 1456.81   15.83
  -7   0   1   94.86    7.86
  -7   0   1  113.20    7.44
  -7   0   2  458.88    8.52
  -7   0   2  464.05    9.42
  -7   0   3  744.22   12.01
  -7   0   4  778.99   11.31
  -7   0   5   21.91    6.70
  -7   0   6  314.89    8.03
  -7   0   7  394.89   10.85
  -7   0   8  636.30   11.74
  -7   0   9   43.56    9.64
  -7   0  10  174.41    9.88
  -7   0  10  152.79    9.75
  -7   0  11    9.91    8.49
  -7   0  11    8.51    9.60
  -7   1   1 1229.51   13.04
   7   1  -1 1035.02   11.90
  -7   1   1 1172.52   14.25
   7   1  -1 1211.00   14.70
   7   1  -2   83.80    6.96
   7   1  -2   87.97    6.84
  -7   1   2   88.81    6.81
  -7   1   2  102.11    7.84
  -7   1   3  981.11   13.48
   7   1  -3  940.36   11.46
   7   1  -3 1082.84   14.54
   7   1  -4   72.21    6.69
   7   1  -4   84.44    7.00
   7   1  -4   57.66    9.21
  -7   1   4   78.85    9.20
   7   1  -5 1211.14   12.74
   7   1  -5 1268.07   16.74
  -7   1   5 1232.11   13.20
   7   1  -5 1377.36   15.38
   7   1  -6  133.57    7.51
  -7   1   6  120.84    7.34
   7   1  -6  111.64    7.75
   7   1  -6  135.14    9.19
  -7   1   7  405.34    9.32
   7   1  -7  444.28    9.61
   7   1  -7  426.75   10.03
   7   1  -7  532.69   11.70
   7   1  -8   27.08    7.11
  -7   1   8   19.61    7.27
   7   1  -8   17.45    7.36
   7   1  -9  102.17   10.25
  -7   1   9  139.00    8.41
   7   1  -9  123.05    9.04
  -7   1  10   43.95   10.51
   7   1 -10   59.15    8.55
  -7   1  10   65.65    9.37
   7   1 -10   69.82    9.40
   7   1 -11  181.55   12.14
  -7   1  11  165.80    9.60
   7   1 -11  145.78   10.44
  -7   1  11  227.80   12.00
  -7   2   1   17.03    8.61
  -7   2   1   30.06    8.15
   7   2  -1   40.02    7.91
   7   2  -1   37.72    6.56
   7   2  -2 1025.38   11.88
  -7   2   2 1140.71   15.04
   7   2  -2 1111.97   12.98
  -7   2   2 1155.47   12.13
  -7   2   3   38.82    8.70
   7   2  -3   32.51    8.88
   7   2  -3   21.01    8.89
  -7   2   4 1738.33   17.57
   7   2  -4 1643.95   17.14
   7   2  -4 1600.20   14.45
   7   2  -4 1793.67   21.32
   7   2  -5   32.99    6.93
   7   2  -5   23.25    7.05
  -7   2   5   35.63    8.92
   7   2  -5   23.72    6.77
  -7   2   6 1014.68   13.92
   7   2  -6 1115.72   14.24
   7   2  -6  330.79    9.51
   7   2  -6 1008.26   12.08
   7   2  -7   46.54    7.21
  -7   2   7   74.37    7.52
   7   2  -7   73.57    7.44
   7   2  -7   74.82    7.92
   7   2  -8  455.46   11.28
   7   2  -8  432.08   10.18
  -7   2   8  453.99    9.62
  -7   2   9   40.23    8.09
   7   2  -9   23.46    8.61
   7   2  -9   18.80    7.38
   7   2 -10  254.88   11.62
  -7   2  10  240.50   11.24
   7   2 -10  260.99   11.56
  -7   2  10  265.98   10.13
   7   2 -11   20.63    9.25
  -7   2  11   23.70    8.39
  -7   2  11   22.70    8.83
   7   2 -11    3.13   10.86
   7   3  -1  948.60   13.50
  -7   3   1  900.29   10.82
  -7   3   1  946.87   13.26
   7   3  -1  896.05   12.43
   7   3  -2  138.99    7.46
  -7   3   2  142.48    6.72
   7   3  -2  162.96    9.96
  -7   3   2  143.26    8.48
  -7   3   3 1456.55   15.82
   7   3  -3 1667.91   16.82
   7   3  -3 1435.80   13.42
   7   3  -4   68.99    7.37
   7   3  -4   46.84    6.79
  -7   3   4   41.98    6.93
   7   3  -5 1377.11   13.80
   7   3  -5 1292.70   15.46
  -7   3   5 1491.83   16.93
  -7   3   6   71.67    7.40
   7   3  -6   95.01    7.41
   7   3  -6  107.46    7.52
   7   3  -7  725.36   11.70
   7   3  -7  715.04   14.02
   7   3  -7  840.45   14.15
  -7   3   7  700.25   10.76
   7   3  -8   31.11    8.76
   7   3  -8    2.08    9.78
   7   3  -8   20.74    7.90
  -7   3   8   10.77   10.36
   7   3  -9  221.40    8.89
  -7   3   9  266.53    9.34
   7   3  -9  248.12   11.39
   7   3 -10   34.70   10.67
   7   3 -10   17.87    9.12
  -7   3  10   24.22    9.83
  -7   3  10   13.97    8.92
   7   3 -11  282.49   16.12
   7   3 -11  228.49   10.83
  -7   3  11  245.40    9.54
  -7   3  11  280.91   10.48
   7   4  -1    8.35    7.38
  -7   4   1   -5.32    7.87
  -7   4   1   13.21    6.56
   7   4  -1    0.64    8.08
  -7   4   2 1047.68   14.62
   7   4  -2 1537.74   14.10
   7   4  -2 1738.29   20.19
  -7   4   2 1660.45   15.15
  -7   4   3   -6.81    7.31
   7   4  -3   -0.42    7.27
   7   4  -3   11.90    7.28
   7   4  -3   -1.26    6.40
   7   4  -4  623.91   12.86
  -7   4   4  534.04    9.75
   7   4  -4  510.45    8.74
   7   4  -4  536.77   13.81
   7   4  -5   91.82    7.70
   7   4  -5   97.23    7.55
   7   4  -5   91.01    7.11
  -7   4   5   76.07   10.38
   7   4  -6 1008.97   12.29
  -7   4   6  988.10   12.59
   7   4  -6  999.76   19.22
   7   4  -6  884.32   13.40
   7   4  -7   23.53   10.79
   7   4  -7    2.23    7.40
   7   4  -7   -2.84    8.94
  -7   4   7   15.00   10.31
   7   4  -8  546.06   11.90
   7   4  -8  442.29   10.76
  -7   4   8  423.90    9.29
   7   4  -9   17.49    8.64
   7   4  -9   50.65   11.51
  -7   4   9   10.71    7.74
  -7   4  10  237.80    9.12
   7   4 -10  228.19   10.70
   7   4 -10  318.28   14.88
   7   4 -11   43.12   15.69
  -7   4  11    0.38    9.40
  -7   4  11   31.71    8.04
   7   4 -11   26.63   11.77
   7   5  -1  873.08   17.06
   7   5  -1  878.61   11.29
  -7   5   1  935.94   10.97
  -7   5   1  930.16   14.60
   7   5  -2   81.10   10.93
  -7   5   2   46.05    7.06
   7   5  -2   41.34    6.93
  -7   5   2   79.59    9.33
   7   5  -3  643.90   10.70
  -7   5   3  687.39   11.84
   7   5  -3  677.76   13.44
   7   5  -3  749.91   15.12
   7   5  -4   65.42   10.75
   7   5  -4   69.60    9.62
   7   5  -4   94.07    8.90
  -7   5   4   64.58    7.37
   7   5  -5  261.44   10.73
   7   5  -5  478.13   11.25
  -7   5   5  391.46   11.97
   7   5  -5  427.48    8.68
   7   5  -6  125.49   10.52
   7   5  -6  137.37   10.16
  -7   5   6  109.67    7.84
   7   5  -6  123.63    7.89
   7   5  -7  450.18   14.82
   7   5  -7  366.13    9.20
   7   5  -7  434.13   10.53
  -7   5   7  382.91    9.00
   7   5  -8   40.83    8.58
  -7   5   8   14.79    7.72
   7   5  -8   37.02   12.65
   7   5  -8   32.56    7.94
   7   5  -9  363.17   11.65
  -7   5   9  266.53    9.00
  -7   5  10   14.25    8.43
   7   5 -10   26.04   13.24
   7   6  -1  126.82   12.77
  -7   6   1  144.06    7.44
   7   6  -1  112.58    7.64
  -7   6   1  130.94   10.95
  -7   6   2 1095.06   17.36
   7   6  -2 1008.41   18.54
   7   6  -2 1031.12   11.76
  -7   6   2 1021.05   11.60
  -7   6   3  119.45   10.09
   7   6  -3   98.30   11.71
   7   6  -3   59.45    7.20
   7   6  -3   47.90    8.27
   7   6  -4  465.89    8.87
   7   6  -4  363.89   12.82
   7   6  -4  518.67   15.27
  -7   6   4  494.20   11.22
   7   6  -5   70.11    6.93
   7   6  -5   75.50    8.98
  -7   6   5   58.27    7.74
   7   6  -5   85.97   11.93
  -7   6   6  291.86    9.01
   7   6  -6  444.73   19.09
   7   6  -6  365.59   10.53
   7   6  -6  384.52   11.86
   7   6  -7   34.56   18.96
   7   6  -7   44.08    9.63
  -7   6   7   22.23    7.17
   7   6  -7   22.74    7.71
   7   6  -8  312.44   20.93
   7   6  -8  294.73    9.92
  -7   6   8  248.05    9.31
   7   6  -8  334.26   11.28
   7   6  -9   99.05   15.55
  -7   6   9   72.97    7.58
   7   6  -9   77.64    9.83
   7   6 -10  200.04   13.13
  -7   6  10  142.89    8.26
   7   6 -10  268.07   21.77
  -7   7   1  458.59    8.87
   7   7  -1  472.17   15.28
   7   7  -1  458.35    9.89
   7   7  -2  133.89   13.70
  -7   7   2  124.80    6.90
   7   7  -2  121.52    8.19
  -7   7   2  140.27   12.72
   7   7  -3  534.25   19.99
  -7   7   3  725.86   13.15
   7   7  -3  673.96   10.08
   7   7  -3  696.71   21.09
  -7   7   4  129.63    7.90
   7   7  -4  132.26   17.89
   7   7  -4  150.79    7.84
   7   7  -4  172.65   18.40
   7   7  -5  664.16   24.48
  -7   7   5  664.80   11.84
   7   7  -5  679.61   30.98
   7   7  -5  686.59   12.71
   7   7  -6   -4.91    7.17
   7   7  -6   -2.48   16.85
   7   7  -6    9.72    9.40
  -7   7   6   15.88    7.49
  -7   7   7  291.03   10.79
   7   7  -7  309.75   10.58
   7   7  -7  314.97   12.35
   7   7  -7  397.58   22.21
   7   7  -8   54.41    8.67
  -7   7   8   25.58    7.98
   7   7  -8   47.37   17.37
   7   7  -8   29.58    7.98
   7   7  -9  368.52   20.56
   7   7  -9  277.22   11.72
  -7   7   9  212.45    8.45
   7   7  -9  267.11   11.54
   7   7 -10   33.37   10.90
  -7   7  10   49.74    8.06
   7   7 -10   40.16   19.32
   7   8  -1   12.04   14.67
   7   8  -1    2.27    8.58
  -7   8   1   14.50    7.36
   7   8  -2  669.46   10.99
  -7   8   2  599.42   14.08
   7   8  -2  496.58   16.95
   7   8  -2  731.56   25.42
   7   8  -3   69.57    7.83
  -7   8   3   31.65    8.79
   7   8  -4  753.89   11.31
  -7   8   4  756.43   14.69
   7   8  -5   -9.57    7.23
  -7   8   5   17.07    8.00
   7   8  -6  538.23   10.30
  -7   8   6  508.19   12.29
   7   8  -7   12.56   16.40
  -7   8   7  -11.48    7.34
   7   8  -7    5.91   10.47
   7   8  -7   10.89    9.45
  -7   8   8  308.97    9.97
   7   8  -8  303.08   13.40
   7   8  -8  365.93   11.20
   7   8  -8  490.37   24.60
   7   8  -9   39.02    8.84
   7   8  -9   19.06   15.91
   7   8  -9   47.61   10.47
  -7   8   9   29.00    7.86
   7   8 -10  172.02   21.59
  -7   8  10   78.09   10.29
   7   8 -10  173.23   14.26
   7   9  -1  373.76   18.48
   7   9  -1  372.51    9.79
  -7   9   1  465.09   19.40
  -7   9   1  345.21    8.48
   7   9  -2   18.01   10.32
  -7   9   2   27.16   11.26
  -7   9   3  689.93   14.46
   7   9  -3  663.66   10.91
   7   9  -4   53.06    9.49
  -7   9   4   36.12    8.38
  -7   9   5  716.29   13.76
   7   9  -5  757.58   11.86
  -7   9   6   35.02   11.46
   7   9  -6   17.17    7.58
  -7   9   7  346.66    9.39
   7   9  -7  346.21   10.06
   7   9  -8    6.28   13.07
   7   9  -8    6.89   15.82
   7   9  -8   29.49    9.15
  -7   9   8   24.25   10.87
  -7   9   9  146.78    8.74
   7   9  -9  182.92   14.40
   7   9  -9  199.53   12.22
   7   9  -9  205.48   20.28
   7  10  -1   -7.79   11.28
  -7  10   1   23.35   17.50
  -7  10   1    8.86    7.72
   7  10  -1    7.33   16.18
   7  10  -2  563.62   10.32
   7  10  -3   12.16    9.56
  -7  10   3   12.95    9.80
   7  10  -4  520.50   10.67
  -7  10   4  571.22   14.73
  -7  10   5   64.66    9.19
   7  10  -5   41.42    8.22
  -7  10   6  465.32   12.95
   7  10  -6  500.73   10.83
   7  10  -7   22.20    8.52
  -7  10   7   27.03    7.66
   7  10  -8  201.66   12.96
  -7  10   8  190.33    9.25
  -7  10   9   14.62   10.65
   7  10  -9    7.14   13.53
  -7  11   1  587.30   22.93
   7  11  -1  503.23   11.59
   7  11  -2    8.14   12.02
  -7  11   2   62.34   11.21
  -7  11   3  531.25   16.65
   7  11  -3  520.33   11.01
   7  11  -4   20.63    8.05
  -7  11   4   31.22    9.70
  -7  11   5  318.89   13.35
   7  11  -5  312.18   10.52
   7  11  -6   62.36    9.42
  -7  11   6   64.71   11.88
   7  11  -7  246.83   10.68
  -7  11   7  161.72   11.21
   7  11  -8   42.34   13.68
  -7  11   8   38.48    9.00
  -7  12   1   32.43   14.15
   7  12  -1   47.33    9.38
   7  12  -2  442.27   11.00
  -7  12   2  531.23   18.82
   7  12  -3   42.42    8.45
  -7  12   3   29.39   15.50
  -7  12   4  376.94   15.30
   7  12  -4  329.87   10.53
  -7  12   5   64.84   10.02
   7  12  -5   61.39    9.70
  -7  12   6  348.80   14.53
   7  12  -6  365.97   11.85
   7  12  -7    9.16   10.28
  -7  12   7   32.42    8.88
  -7  12   8  155.97   10.19
   7  12  -8  191.49   12.03
   7  13  -1  213.33   11.87
  -7  13   1  207.82   20.41
   7  13  -2   21.70   11.06
  -7  13   2   11.39   18.67
   7  13  -3  324.34   12.15
   7  13  -4   21.35   12.11
  -7  13   4   21.05   11.91
   7  13  -5  248.02   11.45
  -7  13   5  265.13   12.91
  -7  13   6   16.54   10.40
   7  13  -6   35.23   10.63
  -7  13   7  166.84   10.35
   7  13  -7  189.81   11.92
   7  14  -1    7.89    9.59
  -7  14   2  223.33   16.86
   7  14  -2  145.92   11.19
   7  14  -3   52.13   10.09
  -7  14   4  416.32   18.12
   7  14  -4  375.28   11.94
   7  14  -5    5.13   10.65
  -7  14   5   50.42   12.62
   7  14  -6  223.88   13.86
  -7  14   6  191.48   13.00
   7  15  -2  -10.32   12.65
   7  15  -3  190.95   10.92
  -7  15   4   48.27   14.62
   7  15  -4   18.58   10.69
   6 -15   1   24.26    8.89
  -6 -15  -1   17.19    8.88
  -6 -15   0  102.19    9.84
   6 -15   0   83.31   10.02
   6 -15   0  159.93    8.97
   6 -14   2   10.99    9.12
  -6 -14  -2   12.27   11.43
  -6 -14  -2   15.32    8.80
  -6 -14  -1  267.25    9.99
   6 -14   1  257.61   10.07
  -6 -14   0   14.76    8.69
   6 -14   0   39.07    9.18
  -6 -13  -3   -1.18    8.79
   6 -13   3   10.11    9.02
  -6 -13  -3    2.49    9.95
  -6 -13  -3  -31.08   10.45
   6 -13   2  271.52   10.53
  -6 -13  -2  233.35   10.29
  -6 -13  -2  255.91   12.25
  -6 -13  -1   23.25    8.47
   6 -13   1    2.00    7.78
  -6 -13  -1    5.29   12.12
  -6 -13   0  213.43    9.86
   6 -13   0  165.95   21.63
   6 -13   0  222.81    8.21
   6 -13   0  124.31   13.39
  -6 -12  -3  174.44    9.78
   6 -12   3  190.55    9.94
  -6 -12  -3  210.58   13.46
  -6 -12  -3  162.27    9.15
  -6 -12  -2   14.24   11.32
  -6 -12  -2   29.87    8.59
   6 -12   2   21.30    7.60
  -6 -12  -1  406.99   12.42
  -6 -12  -1  472.77   15.55
   6 -12   1  437.91   11.19
   6 -12   0    6.59    7.75
  -6 -12   0   10.70   12.37
   6 -12   0    9.37    7.23
  -6 -12   0   56.23    8.55
  -6 -11  -4  191.53    9.74
   6 -11   4  146.52   11.40
  -6 -11  -4  156.04    9.73
  -6 -11  -4  234.51   13.40
  -6 -11  -3   33.78   12.16
   6 -11   3   43.77    8.15
  -6 -11  -3   38.23    8.53
   6 -11   2  439.60    9.80
  -6 -11  -2  413.96   11.05
  -6 -11  -2  511.80   13.31
  -6 -11  -1   29.40    8.73
   6 -11   1   18.04    7.29
  -6 -11  -1   20.17   13.12
   6 -11   0  382.93    8.63
  -6 -11   0  467.81   16.56
  -6 -11   0  461.54   10.71
   6 -11   0  365.06   13.38
  -6 -10  -4   14.81    8.39
  -6 -10  -4   11.55    8.80
   6 -10   4   39.87    8.15
  -6 -10  -4   40.67   13.64
   6 -10   3  285.06   10.79
  -6 -10  -3  280.52   11.72
  -6 -10  -3  214.59    9.30
  -6 -10  -2   27.43    9.82
   6 -10   2   30.24    7.49
  -6 -10  -2   48.58    8.69
   6 -10   1  499.86   22.25
  -6 -10  -1  483.71   11.00
  -6 -10  -1  577.19   13.86
   6 -10   1  539.04    9.25
   6 -10   0   23.86    8.57
  -6 -10   0    6.03    7.72
   6 -10   0    5.21    7.23
  -6 -10   0    0.50    8.25
   6  -9   5   19.54    8.73
  -6  -9  -5   32.75    9.84
  -6  -9  -5   20.74    8.52
  -6  -9  -5   21.27    8.89
  -6  -9  -4  174.60   12.23
   6  -9   4  144.83    9.35
  -6  -9  -4  115.51   11.20
  -6  -9  -4  110.71    9.66
   6  -9   3   10.82    8.14
  -6  -9  -3   15.84   11.15
  -6  -9  -3   26.02    9.07
  -6  -9  -2  409.06   11.14
  -6  -9  -2  498.11   11.88
   6  -9   2  437.88    9.49
  -6  -9  -1   -2.44    9.01
   6  -9   1    9.11   12.14
  -6  -9  -1   12.46    8.29
   6  -9   1   11.87    6.84
   6  -9   0  243.37    9.06
  -6  -9   0  348.88   10.93
  -6  -9   0  345.67   10.18
   6  -9   0  364.20    9.83
  -6  -8  -5  192.29   10.54
  -6  -8  -5  268.99   13.86
  -6  -8  -5  203.84    9.99
   6  -8   5  191.09   10.35
  -6  -8  -4   20.81    8.59
  -6  -8  -4   11.06    7.88
  -6  -8  -4    3.79    9.71
   6  -8   4    8.29    8.08
  -6  -8  -3  249.54    9.69
  -6  -8  -3  265.86   12.51
   6  -8   3  271.69    9.11
   6  -8   2   16.49    7.17
   6  -8   2    5.07   13.41
  -6  -8  -2    4.85    7.81
  -6  -8  -2   17.36    9.12
  -6  -8  -1  398.10   13.83
   6  -8   1  390.39   13.84
  -6  -8  -1  495.33   11.91
   6  -8   1  320.70    8.12
  -6  -8   0   21.16    7.42
   6  -8   0   26.78    6.25
  -6  -8   0   43.13   10.66
   6  -8   0   19.62    7.85
   6  -7   5   -3.14    9.12
  -6  -7  -5   14.49   10.08
  -6  -7  -5    4.24   10.01
  -6  -7  -5    2.87    8.87
  -6  -7  -4  359.08   10.33
   6  -7   4  340.63    9.84
  -6  -7  -4  476.16   11.74
  -6  -7  -3   32.59    9.13
   6  -7   3   39.39    8.28
  -6  -7  -3   53.80    8.45
   6  -7   2  448.78    9.20
  -6  -7  -2  463.24   10.66
  -6  -7  -2  616.26   15.90
   6  -7   2  500.38   15.08
  -6  -7  -1   17.29    8.73
   6  -7   1   18.39    9.31
   6  -7   1   16.32    6.81
  -6  -7  -1   12.66    8.63
   6  -7   0  611.91   10.96
  -6  -7   0  746.21   11.19
  -6  -7   0  800.12   13.76
   6  -7   0  725.39    9.72
  -6  -6  -6   18.28    9.43
  -6  -6  -6   39.80    8.82
   6  -6   5  380.05   11.23
  -6  -6  -5  396.81   10.81
  -6  -6  -5  442.47   12.67
  -6  -6  -5  324.41   11.48
  -6  -6  -4   48.89   11.70
   6  -6   4    8.66    8.34
  -6  -6  -4   61.06   10.81
  -6  -6  -3  440.63   10.97
  -6  -6  -3  507.76   13.28
   6  -6   3  484.83    9.71
   6  -6   2    3.62    8.79
   6  -6   2   11.38    7.16
  -6  -6  -2    8.57   10.96
  -6  -6  -2   24.78    8.63
   6  -6   1 1055.14   12.57
  -6  -6  -1 1140.09   13.52
  -6  -6  -1 1332.26   17.62
   6  -6   1 1118.94   17.12
  -6  -6   0   68.05    7.99
   6  -6   0   58.70    6.43
   6  -6   0   50.46    6.33
  -6  -6   0   40.66    8.20
   6  -5   6  121.00   10.33
  -6  -5  -6  149.64   11.71
  -6  -5  -6  168.65   10.93
  -6  -5  -6  143.94   13.02
  -6  -5  -5   27.41    9.80
   6  -5   5   14.17    9.41
  -6  -5  -5   16.21    8.69
  -6  -5  -5   46.75   13.10
  -6  -5  -4  476.16   12.03
   6  -5   4  407.38   10.13
  -6  -5  -4  432.36   11.18
   6  -5   3   13.40    9.73
  -6  -5  -3   28.19    8.66
  -6  -5  -3   36.54    8.79
  -6  -5  -2  965.08   15.89
  -6  -5  -2  861.77   13.13
   6  -5   2  898.21   11.13
   6  -5   2  929.17   16.01
   6  -5   1   -0.31    8.92
   6  -5   1   -5.05    6.40
  -6  -5  -1  -29.28    8.84
  -6  -5  -1  -13.03    8.84
  -6  -5   0 1701.59   16.27
   6  -5   0 1290.80   13.72
  -6  -5   0 1864.86   18.91
   6  -5   0 1562.21   13.81
   6  -4   6   38.78   11.85
  -6  -4  -6   16.49   10.02
  -6  -4  -6   30.59   10.07
  -6  -4  -6   31.39   11.23
   6  -4   5  150.13    9.77
  -6  -4  -5  245.42   11.32
  -6  -4  -5  215.12   10.85
  -6  -4  -5  227.73   10.66
   6  -4   4   30.67    8.61
  -6  -4  -4   -5.98    9.44
  -6  -4  -4   19.50   12.82
   6  -4   3  305.15    9.30
   6  -4   3  292.19   10.72
  -6  -4  -3  279.37    9.81
  -6  -4  -3  325.75   10.01
  -6  -4  -2   46.53    8.33
  -6  -4  -2   37.58    8.28
   6  -4   2   40.66   11.38
   6  -4   2   39.71    7.08
  -6  -4  -1  460.38   10.35
  -6  -4  -1  956.45   13.33
   6  -4   1  791.21   11.97
   6  -4   1  804.51   10.40
  -6  -4   0   14.84    6.62
   6  -4   0   15.91    9.58
   6  -4   0    7.04    6.73
  -6  -4   0   20.67    7.83
  -6  -3  -6  125.08   10.93
   6  -3   6  143.00   10.44
  -6  -3  -6  147.82   10.98
  -6  -3  -6  129.37   12.98
  -6  -3  -5   29.25    9.58
   6  -3   5   21.27   11.31
  -6  -3  -5   18.23    9.11
  -6  -3  -5   25.03    8.39
   6  -3   4  231.74   13.21
  -6  -3  -4  224.21   10.25
  -6  -3  -4  259.68   10.22
  -6  -3  -3   47.87    7.95
  -6  -3  -3   62.47    8.14
   6  -3   3   39.98    8.80
   6  -3   3   57.49    8.14
  -6  -3  -2  212.18    8.65
   6  -3   2  357.69   10.18
   6  -3   2  313.45    8.56
  -6  -3  -2  383.54   10.33
  -6  -3  -1   48.63    9.82
   6  -3   1   49.09    8.94
   6  -3   1   35.79    7.26
  -6  -3  -1   62.44   10.08
   6  -3   0  790.28   11.23
   6  -3   0  898.70   10.88
  -6  -3   0  882.57   11.80
  -6  -3   0  930.59   11.96
  -6  -2  -6   21.98    9.24
  -6  -2  -6   36.13   14.80
  -6  -2  -6    6.11   12.31
   6  -2   6   22.27   10.21
  -6  -2  -5  414.07   11.24
  -6  -2  -5  434.90   11.32
  -6  -2  -5  303.21   13.20
   6  -2   5  390.32   11.75
   6  -2   4   41.91   11.43
  -6  -2  -4   11.21    9.03
  -6  -2  -4   -1.53    8.84
  -6  -2  -3  339.70   10.39
   6  -2   3  303.36   10.05
   6  -2   3  329.93    9.85
  -6  -2  -3  324.59    9.66
   6  -2   2  161.40    8.67
   6  -2   2  144.56    8.52
  -6  -2  -2  160.12    8.91
  -6  -2  -2  137.23    8.79
  -6  -2  -1  732.42   11.38
   6  -2   1  733.49   10.90
   6  -2   1  667.92   10.12
  -6  -2  -1  727.26   11.56
  -6  -2   0  218.05    7.92
   6  -2   0  152.95    6.60
  -6  -2   0  206.63   10.31
   6  -2   0  213.24   10.06
   6  -1   6  214.81   11.24
  -6  -1  -6  200.58   13.68
  -6  -1  -6  228.35   11.40
  -6  -1  -6  242.81   10.82
  -6  -1  -5   46.96   11.77
  -6  -1  -5   23.56    8.63
   6  -1   5  107.62   12.36
  -6  -1  -5   16.83    9.04
   6  -1   4  232.67    9.60
  -6  -1  -4  340.34   10.77
  -6  -1  -4  354.39   10.66
  -6  -1  -3   -9.34    9.12
   6  -1   3   15.13    7.65
  -6  -1  -3    8.49   10.33
   6  -1   3   14.39   10.94
   6  -1   2 1442.45   17.30
  -6  -1  -2 1440.50   16.11
   6  -1   2 1443.16   14.92
  -6  -1  -2 1547.68   16.24
  -6  -1  -1   13.81    7.83
   6  -1   1   27.15    6.47
  -6  -1  -1    1.36    7.83
   6  -1   1   25.75    7.13
  -6  -1   0 1894.28   16.78
   6  -1   0 1483.75   13.99
   6  -1   0 1730.15   15.70
  -6  -1   0 1733.35   15.66
  -6   0  -6   19.65   10.05
  -6   0  -6   41.18   10.01
  -6   0  -6   62.35   13.29
  -6   0  -5  637.93   12.59
  -6   0  -5  519.75   13.50
  -6   0  -5  613.21   13.75
  -6   0  -4    5.71    9.08
  -6   0  -4    9.35    8.34
  -6   0  -3  973.30   13.92
  -6   0  -3 1078.63   14.21
  -6   0  -2   48.56    8.41
  -6   0  -2   69.24    8.19
  -6   0  -1 1980.19   17.39
  -6   0  -1 1994.53   17.54
  -6   0   0    7.82    6.82
  -6   0   0   16.45    7.21
  -6   0   1 2078.41   17.58
  -6   0   1 2153.42   19.33
  -6   0   2  186.09    7.86
  -6   0   2  180.58    6.96
  -6   0   3 1807.64   16.14
  -6   0   4    7.91    6.53
  -6   0   5  675.81   10.45
  -6   0   6  100.52    7.42
  -6   0   7  668.09   10.67
  -6   0   7  741.01   11.98
  -6   0   8   37.28    7.12
  -6   0   8   12.77    7.90
  -6   0   9  307.49   10.45
  -6   0   9  319.50    9.08
  -6   0  10   33.77    9.37
  -6   0  10    3.31    7.71
  -6   0  11  247.08   12.66
  -6   0  11  275.17   11.43
  -6   1   1   -3.34    7.30
  -6   1   1    2.20    6.12
   6   1  -1    1.13    6.31
   6   1  -1   -3.02    8.55
  -6   1   2 1417.89   13.64
  -6   1   2 1546.87   15.60
   6   1  -2 1408.04   14.45
   6   1  -2 1300.98   14.03
   6   1  -3   -0.02    6.02
  -6   1   3   -2.84    6.38
   6   1  -3    7.71    5.94
   6   1  -3   14.41    5.95
   6   1  -4  281.06    8.43
   6   1  -4 1561.31   15.40
   6   1  -4 1636.57   16.97
  -6   1   4 1454.78   14.08
   6   1  -5   15.36    5.93
  -6   1   5   15.75    7.23
   6   1  -5    7.40    6.07
   6   1  -5   22.18    7.24
   6   1  -6  496.63    9.93
   6   1  -6  595.96   11.42
  -6   1   6  412.37    8.97
   6   1  -6  533.81    9.77
   6   1  -7   33.19    7.15
  -6   1   7   37.84    7.04
   6   1  -7   48.61    7.84
  -6   1   7   40.24    7.18
  -6   1   8  736.50   11.66
   6   1  -8  732.59   12.82
  -6   1   8  764.68   11.29
   6   1  -8  744.85   13.37
   6   1  -9    5.13   11.39
   6   1  -9   14.60    7.90
  -6   1   9   15.07   11.72
  -6   1   9    5.45    7.56
  -6   1  10  487.44   15.18
  -6   1  10  394.22    9.74
   6   1 -10  420.32   12.86
   6   1 -10  354.03   13.53
   6   1 -11   24.00    9.84
  -6   1  11   30.67    9.37
   6   1 -11   22.33    9.30
  -6   1  11    3.71   10.70
   6   2  -1 1282.80   13.84
  -6   2   1 1300.96   12.74
   6   2  -1 1050.31   11.56
  -6   2   1 1319.80   15.08
   6   2  -2  163.76    6.73
  -6   2   2  154.84    7.82
   6   2  -2  146.03    7.42
  -6   2   2  153.65    6.76
   6   2  -3 1083.10   13.55
  -6   2   3  924.91   11.85
   6   2  -3  943.73   10.80
   6   2  -3  970.14   13.79
   6   2  -4  202.96    7.73
   6   2  -4  204.94    7.34
   6   2  -4  224.14    9.58
  -6   2   4  195.90    7.04
   6   2  -5 1616.24   15.09
   6   2  -5 1875.09   19.50
  -6   2   5 1706.14   16.21
   6   2  -5 1659.78   21.48
   6   2  -6   76.64    6.86
   6   2  -6   87.40    6.72
  -6   2   6   69.31    7.16
   6   2  -6   77.23    7.46
  -6   2   7  675.20   10.28
   6   2  -7  775.84   14.07
   6   2  -7  644.00   12.46
   6   2  -8   75.78    8.32
  -6   2   8   95.75   10.96
   6   2  -8   89.02    8.60
  -6   2   8  109.40    7.91
  -6   2   9  222.58    8.42
   6   2  -9  230.20    9.72
  -6   2   9  265.57    9.12
   6   2  -9  210.32   11.12
   6   2 -10   30.34    9.63
  -6   2  10   41.24    7.67
  -6   2  10   59.48    8.87
   6   2 -10   40.80    9.71
   6   2 -11  152.90   10.19
  -6   2  11  169.26    9.67
   6   2 -11  209.35   11.79
  -6   2  11  187.51   12.51
   6   3  -1  183.92    8.11
  -6   3   1  208.76    7.05
  -6   3   1  251.96    8.16
   6   3  -1  230.64    7.88
   6   3  -2  596.47   10.68
   6   3  -2  523.32    8.80
  -6   3   2  576.52    8.92
  -6   3   2  339.35    8.70
   6   3  -3  187.17    6.92
  -6   3   3  202.02    7.53
   6   3  -3  208.18    7.81
   6   3  -4 1015.06   13.58
   6   3  -4  970.65   12.94
  -6   3   4  885.37   11.87
   6   3  -5   49.03    6.59
  -6   3   5   39.30    7.26
   6   3  -5   36.14    7.08
   6   3  -6 1186.48   15.35
   6   3  -6 1019.66   12.79
  -6   3   6  972.29   11.75
   6   3  -7  156.45   10.47
   6   3  -7  157.66    9.30
  -6   3   7  143.42    7.52
  -6   3   8  376.58    9.49
  -6   3   8  516.41   10.28
   6   3  -8  506.51   10.97
   6   3  -8  540.83   13.24
   6   3  -9   20.47    8.27
  -6   3   9   22.33    7.94
   6   3  -9   22.07    9.38
  -6   3   9   33.45   10.31
  -6   3  10  225.63    9.72
   6   3 -10  290.96   12.41
  -6   3  10  256.64   11.50
   6   3 -10  237.03   10.99
   6   3 -11   54.43   13.71
  -6   3  11   44.85    8.81
   6   3 -11   47.21    9.97
  -6   3  11   28.62    9.86
  -6   4   1 1553.27   19.23
   6   4  -1 1491.52   17.70
  -6   4   1 1544.77   13.77
   6   4  -1 1414.12   13.89
   6   4  -2   58.36    8.93
  -6   4   2   43.58    8.53
  -6   4   2   50.80    6.37
   6   4  -2   67.71    7.36
   6   4  -3  663.93   13.13
   6   4  -3  329.99    9.43
  -6   4   3  363.11    8.56
   6   4  -3  555.40    9.66
   6   4  -4   15.70    6.46
  -6   4   4    9.44    8.99
   6   4  -4   14.94    7.85
   6   4  -4   15.83    6.88
  -6   4   5  782.02   11.47
   6   4  -5  899.00   13.65
   6   4  -5  820.61   11.24
   6   4  -5  807.04   16.09
   6   4  -6   22.33    7.38
  -6   4   6   43.97    6.74
   6   4  -6   37.44    6.99
   6   4  -6   19.88   10.10
  -6   4   7  521.49   11.27
   6   4  -7  582.73   11.96
  -6   4   8   14.76    9.31
   6   4  -8   45.10   13.07
   6   4  -8    0.23    8.58
  -6   4   8   10.02    7.78
   6   4  -9  225.50   14.18
   6   4  -9  214.03   10.05
  -6   4   9  235.15    8.80
  -6   4   9  180.18   10.70
   6   4 -10   10.88   10.86
   6   4 -10   31.61    9.90
  -6   4  10   28.48    7.76
  -6   4  10   39.02    8.23
   6   4 -11  201.12   11.77
  -6   4  11  166.96    9.04
  -6   4  11  217.96   12.74
   6   4 -11  231.03   16.03
   6   5  -1  109.93    9.50
   6   5  -1  112.65    7.79
  -6   5   1  110.94    7.27
  -6   5   1   99.44    6.98
  -6   5   2 1121.61   14.86
  -6   5   2 1287.92   12.62
   6   5  -2 1193.32   14.01
   6   5  -2 1311.82   19.54
   6   5  -3  133.23    9.99
  -6   5   3  118.30    7.07
   6   5  -3   96.05    7.67
   6   5  -3  126.97    9.98
   6   5  -4  917.00   18.31
   6   5  -4  926.25   11.31
  -6   5   4  899.26   12.43
   6   5  -4 1057.15   15.28
   6   5  -5  220.29   10.81
  -6   5   5  209.23    9.38
   6   5  -5  206.05    7.74
   6   5  -5  212.42   10.30
   6   5  -6  561.22   11.70
   6   5  -6  572.80   17.41
   6   5  -6  527.01   11.06
  -6   5   6  480.06    9.87
  -6   5   7   14.83    7.21
   6   5  -7    6.31   12.71
   6   5  -7    0.14    9.19
   6   5  -8  401.67   11.27
  -6   5   8  368.15   10.83
  -6   5   8  417.67    9.03
   6   5  -9   51.53   11.40
  -6   5   9   27.98    7.62
  -6   5   9   12.22    7.85
   6   5  -9   24.57    9.28
  -6   5  10  237.07    9.33
   6   5 -10  268.63   11.81
   6   5 -10  290.29   19.58
  -6   5  10  247.77    9.65
  -6   5  11   11.70    7.83
   6   5 -11   39.71   13.52
  -6   5  11   26.10    9.18
   6   5 -11   25.87   16.02
   6   6  -1 1498.96   14.24
  -6   6   1 1490.56   19.38
  -6   6   1 1605.03   13.92
   6   6  -1 1627.03   23.49
   6   6  -2   48.61    7.41
  -6   6   2   56.36    6.48
   6   6  -2   43.12   11.45
  -6   6   2   46.56    7.12
   6   6  -3 1191.92   22.51
  -6   6   3 1438.66   17.28
   6   6  -3 1375.71   23.89
   6   6  -3 1397.78   13.82
   6   6  -4   48.15   11.81
   6   6  -4   41.54    9.23
   6   6  -4   33.96    7.18
  -6   6   4   54.18    8.96
   6   6  -5  798.04   11.08
   6   6  -5 1032.61   24.87
  -6   6   5  538.32   10.11
   6   6  -5  872.26   15.00
   6   6  -6   76.90    6.88
   6   6  -6   78.50    8.06
   6   6  -6   82.26   12.60
  -6   6   6   72.54    7.50
   6   6  -7  334.52   15.20
   6   6  -7  298.38    9.04
  -6   6   7  281.14    8.76
   6   6  -8    7.55   12.13
   6   6  -8    6.51    8.59
  -6   6   8    9.02    7.03
  -6   6   9  314.63    8.96
   6   6  -9  367.26   12.04
   6   6  -9  502.06   17.07
  -6   6   9  396.00   13.09
  -6   6  10   26.72   10.72
  -6   6  10   43.18    8.10
   6   6 -10   24.79   10.94
   6   6 -11  182.94   15.09
   6   7  -1    3.09   10.66
   6   7  -1    7.99    7.14
  -6   7   1   -1.47    5.97
  -6   7   2 1698.82   20.55
   6   7  -2 1627.50   31.46
   6   7  -2 1618.65   14.87
  -6   7   3   33.59    7.56
   6   7  -3   41.85    7.74
  -6   7   4 1586.87   18.64
   6   7  -4 1575.39   15.54
   6   7  -5   58.08   17.48
  -6   7   5   40.49    7.34
   6   7  -5   59.65    6.82
   6   7  -5   62.44   11.18
   6   7  -6  380.11   20.22
   6   7  -6  296.10    8.26
   6   7  -6  355.12   12.11
  -6   7   6  280.17    8.90
   6   7  -7   11.06   10.71
  -6   7   7    8.40   10.04
   6   7  -7   22.60    7.55
   6   7  -7   24.73   12.67
  -6   7   8  453.51   10.10
   6   7  -8  570.37   13.81
   6   7  -8  655.86   22.56
  -6   7   9   41.44    7.76
  -6   7   9   12.58    8.82
   6   7  -9   64.13   11.65
   6   7  -9   58.88   14.92
  -6   7  10  136.72    8.70
  -6   7  10  176.81    9.68
   6   7 -10  161.50   12.91
   6   7 -10  285.84   18.37
  -6   8   1  617.47    9.07
   6   8  -1  651.02   11.99
   6   8  -1  684.03   20.68
  -6   8   2   58.88    9.18
   6   8  -2   39.94   16.67
   6   8  -2   41.06   14.42
   6   8  -2   50.96   11.04
  -6   8   3  921.22   14.81
   6   8  -3  911.30   13.30
  -6   8   4   13.93    9.68
   6   8  -4   -1.01    7.44
  -6   8   5  645.05   11.19
   6   8  -5  651.30   10.33
   6   8  -6   38.40    6.78
  -6   8   6   50.69    9.58
   6   8  -7  497.04   11.22
  -6   8   7  468.04    9.55
   6   8  -7  543.48   15.13
   6   8  -7  592.11   21.09
   6   8  -8    8.21    9.02
   6   8  -8   -0.59   18.06
  -6   8   8   18.63    8.12
  -6   8   9  225.90    8.19
   6   8  -9  351.28   12.84
   6   8  -9  383.98   18.31
  -6   8  10   41.60    7.93
  -6   8  10   50.20    8.86
   6   8 -10   53.03   18.47
   6   8 -10   67.03   12.34
   6   9  -1   16.84    8.38
   6   9  -1    1.80   14.24
  -6   9   1   16.43    6.91
  -6   9   1    5.06    9.70
   6   9  -2  839.38   11.84
  -6   9   2  903.50   16.98
   6   9  -3   14.68    8.21
  -6   9   3   31.35    8.94
   6   9  -4  408.16    9.73
  -6   9   4  418.04   10.61
  -6   9   5   62.13    7.98
   6   9  -5   91.13    8.98
   6   9  -6  337.26    9.45
  -6   9   6  338.70   10.87
  -6   9   7   53.72    7.06
   6   9  -7   24.14   14.33
   6   9  -7   46.76    8.37
   6   9  -7   25.13   13.01
   6   9  -8  378.40   16.31
   6   9  -8  351.61   11.75
  -6   9   8  302.35    9.79
   6   9  -8  358.61   14.29
  -6   9   9   17.64    8.05
   6   9  -9   13.69   10.79
   6   9  -9   20.29   16.82
  -6   9  10  116.43   10.17
   6   9 -10  180.65   20.00
   6   9 -10  148.91   14.01
   6  10  -1  722.10   13.18
   6  10  -1  487.37   31.32
  -6  10   1  773.56   18.59
  -6  10   1  709.02   10.27
   6  10  -2   32.61    8.61
  -6  10   3  245.50   10.74
   6  10  -3  253.11    9.55
   6  10  -4   26.13    8.27
  -6  10   4   37.90   10.88
  -6  10   5  424.39   11.27
   6  10  -5  355.18    9.80
   6  10  -6   22.37    7.84
  -6  10   6   33.94    8.16
  -6  10   7  217.84   10.45
   6  10  -7  262.86   10.41
  -6  10   8   31.72    8.26
   6  10  -8   -0.85   12.68
   6  10  -8   11.36   12.78
   6  10  -8   30.69    9.64
   6  10  -9  187.48   17.74
   6  10  -9  226.07   13.06
  -6  10   9  167.14    8.96
   6  11  -1   30.54    8.11
  -6  11   1   25.58   10.83
   6  11  -2  631.56   13.41
  -6  11   3   28.00   12.27
   6  11  -3   16.81    8.85
  -6  11   4  191.30    9.80
   6  11  -4  189.76    9.57
   6  11  -5   32.95    8.79
  -6  11   5   42.99   11.33
   6  11  -6  501.99   11.89
  -6  11   6  447.52   11.54
   6  11  -7   84.04   11.14
  -6  11   7   38.00    8.19
   6  11  -8  159.11   11.32
  -6  11   8  145.80   10.36
  -6  11   9    9.36    7.77
   6  11  -9    8.48   11.62
   6  11  -9   23.25   12.46
   6  11  -9    4.68   11.77
   6  12  -1  540.36   11.29
  -6  12   1  647.13   19.92
  -6  12   2   26.99   10.48
   6  12  -2  -13.05    8.33
   6  12  -3  528.89   11.69
  -6  12   3  541.38   15.99
  -6  12   4   -2.93    9.54
   6  12  -4   15.06    9.27
  -6  12   5  321.39   13.22
   6  12  -5  327.52   11.28
   6  12  -6   30.73    9.04
  -6  12   6   19.88    9.21
   6  12  -7  310.97   11.81
  -6  12   7  263.07   10.04
   6  12  -8   20.14   11.11
  -6  12   8   15.32    8.95
   6  13  -1   23.38    8.56
   6  13  -2  458.97   11.58
  -6  13   2  634.13   20.69
  -6  13   3   19.08   11.05
   6  13  -3   32.42   11.96
  -6  13   4  260.12   11.63
   6  13  -4  352.32   11.40
   6  13  -5   35.89    9.67
  -6  13   5   21.57    9.77
   6  13  -6  544.45   14.80
  -6  13   6  498.91   13.62
  -6  13   7   17.41    9.30
   6  13  -7   35.39   11.01
   6  13  -8  262.30   14.36
  -6  13   8  180.38   11.83
   6  14  -1  309.57   10.70
   6  14  -2   37.25   10.39
   6  14  -3  344.54   12.49
  -6  14   3  396.78   16.54
   6  14  -4   72.57   11.80
  -6  14   4   51.71   11.40
  -6  14   5  269.32   12.89
   6  14  -5  309.58   12.28
   6  14  -6   21.96   10.83
  -6  14   6   16.94   10.01
   6  14  -7  235.97   15.90
  -6  14   7  187.15   12.21
   6  15  -1   30.85   11.89
   6  15  -2  290.41   11.28
   6  15  -3   47.87   10.38
   6  15  -4  299.05   15.23
   6  15  -5   26.35   11.34
   6  15  -6  142.95   12.93
   6  16  -1  197.50   11.12
   6  16  -2   25.87   10.04
   6  16  -3  153.87   12.31
   6  16  -4   18.19   13.55
  -5 -16  -1   17.57   10.20
   5 -16   1   74.20   10.95
   5 -16   1   31.82    8.32
  -5 -16  -1   62.57    9.47
  -5 -16   0  190.53    9.90
   5 -16   0   45.93    8.14
   5 -16   0  207.54    9.41
  -5 -15  -2   20.74    8.21
  -5 -15  -2   20.84   12.28
  -5 -15  -2   35.32    8.44
   5 -15   2   15.52   10.84
  -5 -15  -1  172.24   11.70
   5 -15   1  205.94    9.77
   5 -15   0   15.36   12.05
  -5 -15   0   40.99    8.03
   5 -15   0   18.69   10.25
   5 -15   0   49.47    7.82
   5 -14   3   41.63    9.01
  -5 -14  -3   29.56   10.92
  -5 -14  -3   39.86    9.02
  -5 -14  -3   38.48   10.14
  -5 -14  -2  203.72   10.58
   5 -14   2  268.83   10.09
  -5 -14  -2  212.72   12.13
  -5 -14  -2  181.91   11.67
  -5 -14  -1   82.86   13.39
  -5 -14  -1   71.75    8.35
   5 -14   1   75.30    8.91
   5 -14   0  217.20    8.57
  -5 -14   0  244.19    9.03
   5 -14   0  192.58   19.61
   5 -14   0  272.67    9.45
   5 -14   0  169.02   13.70
  -5 -13  -4   51.44   11.92
  -5 -13  -4   30.89    8.63
  -5 -13  -4   61.02   10.94
   5 -13   4   43.87    9.18
  -5 -13  -3  160.74   10.34
   5 -13   3  276.47   12.89
  -5 -13  -3  154.13    9.73
  -5 -13  -3  233.12   12.17
   5 -13   2   28.36    8.15
  -5 -13  -2   30.33    8.51
  -5 -13  -2   24.53   11.60
  -5 -13  -1  234.22   11.11
  -5 -13  -1  229.70   11.95
   5 -13   1  283.28    9.24
   5 -13   0   69.22   10.56
   5 -13   0   64.61   15.37
  -5 -13   0   36.85    9.95
   5 -13   0  133.42    9.25
  -5 -12  -4  258.54   11.56
  -5 -12  -4  217.40    9.88
   5 -12   4  223.74   10.04
  -5 -12  -4  178.08    9.27
   5 -12   3   72.01    9.95
  -5 -12  -3   67.94    8.69
  -5 -12  -3   79.85   10.36
  -5 -12  -3   49.76    8.26
  -5 -12  -2  325.43   10.48
   5 -12   2  379.90    9.20
  -5 -12  -2  373.96   13.07
  -5 -12  -1   66.67    8.07
   5 -12   1   72.25    7.53
  -5 -12  -1   73.42   12.24
   5 -12   0  423.87   12.55
   5 -12   0  513.62   19.35
   5 -12   0  552.12   10.57
  -5 -12   0  546.61   19.74
  -5 -12   0  489.95   10.63
   5 -11   5  192.07   10.95
  -5 -11  -5  184.36   11.23
  -5 -11  -5  135.83    9.55
  -5 -11  -5  188.32   11.40
  -5 -11  -4   22.29   10.20
   5 -11   4   23.74    8.32
  -5 -11  -4   45.02    8.23
  -5 -11  -4   45.03    8.74
   5 -11   3  409.35   10.98
  -5 -11  -3  357.58    9.55
  -5 -11  -3  435.12   12.42
  -5 -11  -2   98.40   10.46
   5 -11   2   85.21    7.65
  -5 -11  -2   87.01   10.28
   5 -11   1  563.87   10.06
  -5 -11  -1  507.73   10.40
  -5 -11  -1  574.19   14.08
  -5 -11   0  134.30   12.94
   5 -11   0  132.96    7.65
   5 -11   0  101.82    8.13
  -5 -11   0  110.19    8.70
  -5 -10  -5   13.35   10.35
  -5 -10  -5    9.70    8.67
  -5 -10  -5   15.92    8.57
   5 -10   5   30.46    9.64
  -5 -10  -4  314.45   12.14
  -5 -10  -4  230.48    9.54
  -5 -10  -4  288.92   11.19
   5 -10   4  283.66    9.23
  -5 -10  -3   63.28    8.73
  -5 -10  -3   52.61    8.44
   5 -10   3   70.70   10.23
  -5 -10  -2  307.06    9.55
  -5 -10  -2  349.54   11.68
   5 -10   2  317.92    8.59
  -5 -10  -1   42.00    8.49
  -5 -10  -1   44.20    9.00
   5 -10   1   68.70    7.34
   5 -10   1   40.82   13.55
   5 -10   0  790.53   11.01
  -5 -10   0 1043.16   20.44
  -5 -10   0  884.93   12.12
   5 -10   0  790.31   16.57
  -5  -9  -6   32.53    8.87
  -5  -9  -6   18.32   10.74
  -5  -9  -6   11.39    9.12
   5  -9   6   19.05    9.62
  -5  -9  -5  253.54   12.02
  -5  -9  -5  291.86   13.65
   5  -9   5  298.51   12.06
  -5  -9  -5  230.70   10.13
  -5  -9  -4   52.78    9.01
  -5  -9  -4   47.24   11.27
  -5  -9  -4   70.43    9.43
   5  -9   4   43.34    7.86
   5  -9   3  218.47    8.02
  -5  -9  -3  278.47   10.34
  -5  -9  -3  205.08    9.24
  -5  -9  -2    4.64    8.46
   5  -9   2   11.63    7.47
  -5  -9  -2   16.50    8.45
  -5  -9  -1  480.58   10.48
  -5  -9  -1  492.67   12.09
   5  -9   1  439.63   16.33
   5  -9   1  458.20    8.92
  -5  -9   0   49.89    7.96
  -5  -9   0   36.74   10.64
   5  -9   0   42.27    8.97
   5  -9   0   33.87    7.37
   5  -8   6  295.60   10.69
  -5  -8  -6  314.94   12.39
  -5  -8  -6  129.84   10.34
  -5  -8  -6  234.60   10.80
  -5  -8  -5   39.28    8.47
  -5  -8  -5   35.04    8.35
  -5  -8  -5   98.26   10.55
   5  -8   5   71.01    9.37
  -5  -8  -4  232.60   10.24
  -5  -8  -4  229.49    9.23
   5  -8   4  172.61    8.47
  -5  -8  -4  145.01    8.91
  -5  -8  -3   64.57    8.27
   5  -8   3   66.89    7.41
  -5  -8  -3   76.25   11.01
  -5  -8  -2  707.46   13.00
   5  -8   2  670.62   10.09
  -5  -8  -2  632.19   10.75
   5  -8   1   70.57    9.48
  -5  -8  -1   65.95    7.46
  -5  -8  -1   86.38    9.20
   5  -8   1   64.82    6.95
   5  -8   0  196.84    7.25
  -5  -8   0  250.54   12.04
  -5  -8   0  256.00    8.74
   5  -8   0  179.50    8.18
   5  -7   6   46.96   11.88
  -5  -7  -6   39.73    8.63
  -5  -7  -6   75.91   14.11
  -5  -7  -6   33.60    9.23
  -5  -7  -5  509.97   12.35
   5  -7   5  409.99   11.05
  -5  -7  -5  409.24   10.10
  -5  -7  -5  387.32   10.44
  -5  -7  -4  150.43    8.47
  -5  -7  -4  130.15    8.37
  -5  -7  -4  139.98    9.73
   5  -7   4  129.02    8.00
  -5  -7  -3  528.75   11.27
   5  -7   3  622.26   12.63
  -5  -7  -3  614.97   12.25
   5  -7   2   71.90   12.37
  -5  -7  -2   89.37    8.99
  -5  -7  -2   55.37    8.18
   5  -7   2   39.02    6.71
   5  -7   1  819.71   10.12
  -5  -7  -1  828.28   11.56
  -5  -7  -1  949.70   14.37
   5  -7   1  715.87   13.39
   5  -7   0  175.60    7.92
   5  -7   0  234.48    7.37
  -5  -7   0  247.97   10.10
  -5  -7   0  122.56    8.62
   5  -6   6  207.77   10.60
  -5  -6  -6  211.71   11.04
  -5  -6  -6  181.62    9.88
  -5  -6  -6  164.73   10.29
  -5  -6  -5  113.51    8.70
  -5  -6  -5   60.20    9.32
   5  -6   5  105.71   10.01
  -5  -6  -5  137.91   10.34
  -5  -6  -4  423.74   11.23
   5  -6   4  453.23    9.63
  -5  -6  -4  567.43   12.40
   5  -6   3  100.52    7.91
  -5  -6  -3   83.99    8.98
  -5  -6  -3  101.83   12.28
   5  -6   2 1618.26   14.36
   5  -6   2 1632.77   24.04
  -5  -6  -2 1061.62   13.33
  -5  -6  -2 1767.32   18.85
   5  -6   1  268.83    7.51
  -5  -6  -1  310.07   12.48
  -5  -6  -1  250.53   11.39
   5  -6   1  231.85    8.98
  -5  -6   0 1046.42   12.91
   5  -6   0  981.88   10.97
   5  -6   0  891.24   13.21
  -5  -6   0 1074.78   14.59
   5  -5   7  155.29   10.78
  -5  -5  -7  119.57   10.87
  -5  -5  -7   57.05   10.98
  -5  -5  -7  103.43   10.64
  -5  -5  -6   90.66    9.14
  -5  -5  -6   81.30   11.33
  -5  -5  -6   82.08   10.35
   5  -5   6  105.20   11.87
  -5  -5  -5  397.70   11.09
   5  -5   5  347.05   12.35
  -5  -5  -5  362.66   11.88
  -5  -5  -5  345.40   10.68
  -5  -5  -4   79.67    8.73
  -5  -5  -4   97.39   12.43
   5  -5   4  100.66    8.79
   5  -5   3  750.67   10.61
  -5  -5  -3  843.80   12.81
  -5  -5  -3  746.76   14.46
  -5  -5  -2   22.28    7.84
   5  -5   2   32.83    6.69
   5  -5   2   24.16    8.07
  -5  -5  -2   30.11    8.55
   5  -5   1 1396.81   14.78
  -5  -5  -1 1409.33   14.96
   5  -5   1 1343.35   17.53
  -5  -5  -1 1555.27   17.87
  -5  -5   0  165.44    7.90
   5  -5   0  137.07    6.53
  -5  -5   0  193.99    8.53
   5  -5   0  139.17    6.38
  -5  -4  -7   79.27   13.76
  -5  -4  -7   66.62    9.61
   5  -4   7   54.86   10.09
  -5  -4  -7   59.02   12.06
  -5  -4  -6  285.02   10.56
  -5  -4  -6  231.47   10.31
   5  -4   6  249.64   10.22
  -5  -4  -6  222.17   11.13
  -5  -4  -5    1.63    8.93
  -5  -4  -5   13.83   13.04
   5  -4   5   -7.47    8.92
  -5  -4  -5  -25.90   12.49
   5  -4   4  302.65    9.95
  -5  -4  -4  268.30    9.68
  -5  -4  -4  320.58   10.26
   5  -4   3   89.67    7.53
  -5  -4  -3   90.27    8.12
  -5  -4  -3   69.30    8.70
   5  -4   3   69.95   10.81
  -5  -4  -2 1105.63   14.07
   5  -4   2 1136.10   16.32
   5  -4   2 1037.30   11.89
  -5  -4  -2  907.21   12.43
  -5  -4  -1   12.88    7.17
  -5  -4  -1   10.28    7.61
   5  -4   1   21.12    6.90
   5  -4   1   13.82    5.81
   5  -4   0 1224.71   11.62
  -5  -4   0 1257.78   12.92
   5  -4   0  996.46   12.10
  -5  -4   0 1437.50   15.84
  -5  -3  -7  221.12   12.07
   5  -3   7  185.40   10.59
  -5  -3  -7  154.82   11.32
  -5  -3  -7  288.97   11.47
   5  -3   6   37.06   10.16
  -5  -3  -6   35.74    8.79
  -5  -3  -6   22.10    8.82
  -5  -3  -6    6.60    9.41
  -5  -3  -5  371.81   11.27
  -5  -3  -5  459.24   12.10
   5  -3   5  421.53   10.99
  -5  -3  -5  490.99   11.58
  -5  -3  -4  -13.98    7.67
   5  -3   4  -15.70    8.80
  -5  -3  -4   19.79    9.02
  -5  -3  -3  495.72   10.84
   5  -3   3  531.75   13.56
  -5  -3  -3  574.26   11.77
   5  -3   3  500.57    9.62
   5  -3   2   54.95    7.97
   5  -3   2   54.16    7.67
  -5  -3  -2   58.24    8.05
  -5  -3  -2   70.76   11.25
  -5  -3  -1  418.92   11.76
  -5  -3  -1  331.89    9.04
   5  -3   1  306.71    8.33
   5  -3   1  324.96    7.73
   5  -3   0   33.65    5.99
  -5  -3   0   41.37    7.34
  -5  -3   0   27.74    6.81
   5  -3   0   33.21    5.74
  -5  -2  -7   34.88    9.63
   5  -2   7   18.48   11.91
  -5  -2  -7   36.77    9.39
  -5  -2  -7   20.46    9.82
  -5  -2  -6  432.73   12.95
  -5  -2  -6  428.15   13.15
  -5  -2  -6  329.24   13.09
   5  -2   6  371.36   11.37
  -5  -2  -5   -2.60    9.11
  -5  -2  -5    0.80    8.25
   5  -2   5   -8.41    8.96
  -5  -2  -5   18.69    7.77
  -5  -2  -4  465.85   11.40
   5  -2   4  471.07   10.88
  -5  -2  -4  473.53   12.92
   5  -2   3  127.08    8.31
  -5  -2  -3  129.10    9.10
   5  -2   3  133.56    8.52
  -5  -2  -3  159.49    9.07
   5  -2   2  750.46   11.09
   5  -2   2  717.77   11.60
  -5  -2  -2  791.83   11.75
  -5  -2  -2  735.55   12.92
  -5  -2  -1    7.86    7.29
   5  -2   1   13.01    6.15
   5  -2   1   14.40    5.96
  -5  -2  -1   13.56    9.77
  -5  -2   0 1572.86   15.64
   5  -2   0 1452.72   14.59
   5  -2   0 1198.13   12.76
  -5  -2   0 1368.46   13.79
  -5  -1  -7  163.81   11.15
  -5  -1  -7  107.50   10.79
  -5  -1  -7  135.17   10.66
   5  -1   7  150.00   13.06
  -5  -1  -6   85.79    9.20
  -5  -1  -6   88.29   12.06
   5  -1   6   94.34   10.40
  -5  -1  -6   72.10   11.28
   5  -1   5  403.10   10.82
  -5  -1  -5  327.68   10.77
  -5  -1  -5  413.36   11.03
  -5  -1  -5  411.13   13.09
  -5  -1  -4   50.69    9.46
   5  -1   4   71.73   11.06
  -5  -1  -4   90.27   10.98
  -5  -1  -3 1454.54   15.88
  -5  -1  -3 1261.22   15.91
   5  -1   3 1311.61   15.82
   5  -1   3 1445.82   15.13
   5  -1   2  347.15   12.21
  -5  -1  -2  292.89    8.86
  -5  -1  -2  336.97    9.32
   5  -1   2  320.06    8.97
  -5  -1  -1 1417.06   14.89
  -5  -1  -1 1116.20   13.28
   5  -1   1 1235.29   12.95
   5  -1   1 1047.20   12.47
   5  -1   0   58.74    6.65
  -5  -1   0   61.86    6.91
  -5  -1   0   68.40    6.84
   5  -1   0   49.08    6.10
  -5   0  -7   60.72   12.32
  -5   0  -7   75.46   11.00
  -5   0  -7   64.88   10.59
  -5   0  -6  392.10   12.11
  -5   0  -6  316.73   11.86
  -5   0  -6  414.06   12.88
  -5   0  -5  158.70   11.68
  -5   0  -5  153.89    9.16
  -5   0  -5  132.71    9.50
  -5   0  -4  390.90   11.04
  -5   0  -4  354.79   10.69
  -5   0  -3  472.80   10.91
  -5   0  -3  462.81   12.70
  -5   0  -2 2274.36   19.54
  -5   0  -2 1807.57   17.11
  -5   0  -1    7.47    7.24
  -5   0  -1   16.87    6.90
  -5   0   0 2818.25   21.14
  -5   0   0 2665.90   20.61
  -5   0   1  347.39    8.52
  -5   0   1  404.84    8.20
  -5   0   2 2707.52   21.26
  -5   0   2 2655.99   23.29
  -5   0   3  755.56   10.52
  -5   0   4 1664.27   15.45
  -5   0   5  151.39    8.62
  -5   0   6  438.14    9.30
  -5   0   6  414.32   10.49
  -5   0   7   18.88    7.38
  -5   0   7   -2.14    7.73
  -5   0   8  986.52   13.08
  -5   0   8 1098.80   14.10
  -5   0   9   80.03    9.24
  -5   0   9   79.99   10.03
  -5   0  10  350.50   11.22
  -5   0  10  402.63   11.72
  -5   0  11   60.88    9.74
  -5   0  11   31.37    8.36
  -5   1   1 1830.35   16.06
   5   1  -1 1690.49   15.24
  -5   1   1 1917.65   18.07
   5   1  -1 1979.01   17.93
   5   1  -2  404.41    8.35
   5   1  -2  432.24    8.97
  -5   1   2  432.83    8.78
  -5   1   2  405.32    8.12
   5   1  -3 1572.94   14.76
   5   1  -3 1650.99   17.32
   5   1  -3 1545.35   18.28
  -5   1   3 1610.14   15.82
   5   1  -4  128.31    9.12
   5   1  -4  114.85    6.96
   5   1  -4  106.03    6.75
  -5   1   4  128.97    8.48
   5   1  -5 1057.68   11.85
  -5   1   5 1013.85   13.01
   5   1  -5  991.24   13.95
  -5   1   6  210.32    7.65
  -5   1   6  232.80    8.12
   5   1  -6  218.48    7.80
   5   1  -6  227.89    8.14
  -5   1   7 1480.41   16.39
  -5   1   7 1426.60   16.03
   5   1  -7 1471.86   16.50
   5   1  -7 1348.74   17.71
   5   1  -8  166.92    8.63
  -5   1   8  222.01   10.18
   5   1  -8  195.92    8.82
  -5   1   8  216.26   11.07
  -5   1   9  313.08   12.02
   5   1  -9  257.21    9.86
  -5   1   9  354.67   12.27
   5   1  -9  323.04   10.71
  -5   1  10   39.71    7.89
  -5   1  10   46.54    9.07
   5   1 -10   56.82    9.23
   5   1 -10   26.93    9.13
  -5   1  11  181.62    9.31
   5   1 -11  213.76   12.71
   5   1 -11  153.83   12.64
  -5   1  11  179.00   10.25
  -5   2   1   99.12    6.00
   5   2  -1  121.09    7.62
   5   2  -1   88.79    6.70
  -5   2   1  120.39    9.89
  -5   2   2  378.11    7.66
  -5   2   2  383.97    8.85
   5   2  -2  436.88    9.47
   5   2  -2  385.57    8.09
   5   2  -3  236.30    7.49
  -5   2   3  237.86    7.25
   5   2  -3  258.80    9.38
   5   2  -4 1841.08   17.45
   5   2  -4 1873.48   20.07
  -5   2   4 1661.55   15.87
   5   2  -5  305.31   10.03
   5   2  -5  335.37   10.23
  -5   2   5  359.56    9.97
   5   2  -6  591.88   10.15
  -5   2   6  588.21   11.40
  -5   2   6  566.48   10.11
   5   2  -6  578.12   11.14
   5   2  -7  302.58   10.39
   5   2  -7  296.88   11.07
  -5   2   7  281.38    8.40
  -5   2   7  292.42    8.42
   5   2  -8  763.53   13.62
  -5   2   8  706.40   11.25
   5   2  -8  733.97   13.46
  -5   2   8  767.63   12.45
  -5   2   9   34.79    8.86
  -5   2   9   35.48    9.30
   5   2  -9   42.34    8.71
   5   2  -9   37.63    8.94
  -5   2  10  480.44   14.48
  -5   2  10  411.88    9.72
   5   2 -10  384.84   11.86
   5   2 -10  373.83   14.08
  -5   2  11    4.54    8.15
  -5   2  11   43.31    9.80
   5   2 -11   32.65    9.88
   5   2 -11   25.97    9.95
  -5   3   1  612.26    8.73
   5   3  -1  672.73   13.31
   5   3  -1  566.61    9.19
  -5   3   1  653.51   11.15
   5   3  -2   28.19    6.07
   5   3  -2   33.48    6.97
  -5   3   2   22.92    6.52
  -5   3   2   24.34    5.54
   5   3  -3 1231.24   15.92
  -5   3   3 1074.85   12.99
   5   3  -3 1118.08   17.17
   5   3  -3 1095.93   11.77
   5   3  -4   92.20    6.25
  -5   3   4  105.97    6.51
   5   3  -4   98.43    6.74
   5   3  -4  111.70    6.61
  -5   3   5  758.07   10.38
   5   3  -5  814.96   10.94
   5   3  -6  707.17   12.16
   5   3  -6  686.87   12.68
  -5   3   6  690.36   10.39
  -5   3   6  639.33   10.18
   5   3  -7  645.67   13.63
   5   3  -7  668.12   11.08
  -5   3   7  596.20   10.36
  -5   3   7  627.40   12.42
   5   3  -8  138.10    9.74
   5   3  -8  129.84   10.28
  -5   3   8  121.48    8.16
  -5   3   8  129.35    8.73
   5   3  -9  299.92   10.52
  -5   3   9  249.03    8.32
   5   3  -9  297.79   11.40
  -5   3   9  291.63    9.71
   5   3 -10    6.88    9.94
  -5   3  10   25.68    7.78
   5   3 -10   22.02    9.12
  -5   3  10   13.96    8.19
   5   3 -11  127.12   11.60
   5   3 -11   96.20   11.45
  -5   3  11  122.10    9.52
  -5   3  11  144.72   10.85
  -5   4   1  367.39    9.33
  -5   4   1  360.24    7.37
   5   4  -1  348.68    7.97
   5   4  -1  313.56   10.25
   5   4  -2  627.05    9.25
  -5   4   2  676.45   12.08
  -5   4   2  611.25    8.72
   5   4  -2  733.71   14.75
   5   4  -3   57.41    6.46
   5   4  -3   78.65    6.82
   5   4  -3   76.56    6.48
  -5   4   3   68.70    6.43
   5   4  -4  733.45   10.06
   5   4  -4  670.90   13.31
   5   4  -4  799.65   12.92
  -5   4   4  690.67   10.58
  -5   4   5   50.41    7.04
   5   4  -5   70.44    7.25
   5   4  -5   77.86    6.58
   5   4  -5   77.22    6.65
  -5   4   6  643.49   12.46
   5   4  -6  638.03   10.75
  -5   4   6  621.28   10.24
  -5   4   7  160.02    8.00
  -5   4   7  164.13    7.19
   5   4  -7  179.39    8.32
   5   4  -7  148.45   10.38
  -5   4   8  334.32    9.50
  -5   4   8  335.97   10.75
   5   4  -8  206.24   10.98
   5   4  -8  347.27    9.50
   5   4  -9   39.67    8.31
  -5   4   9    6.14    6.70
  -5   4   9   -9.66    9.73
   5   4  -9   30.25    9.98
   5   4 -10  406.10   13.22
  -5   4  10  493.93   11.15
  -5   4  10  415.64   10.50
   5   4 -10  483.66   13.98
   5   4 -11   82.28   11.92
  -5   4  11   67.67   10.21
  -5   4  11  118.75   10.86
   5   4 -11   89.74   14.37
  -5   5   1 1170.51   11.28
  -5   5   1 1184.41   16.19
   5   5  -1 1147.29   18.37
   5   5  -1 1195.14   13.46
   5   5  -2   66.48    6.49
  -5   5   2   86.09    6.95
   5   5  -2   80.24    8.28
  -5   5   2   92.35    5.78
  -5   5   3 1544.40   17.26
   5   5  -3 1468.78   25.45
   5   5  -3 1726.21   23.50
   5   5  -3 1480.23   13.80
   5   5  -4  480.51   12.10
   5   5  -4  430.58    8.82
  -5   5   4  457.34   11.38
   5   5  -4  242.97   10.40
   5   5  -5 1010.52   16.18
   5   5  -5  953.90   19.87
   5   5  -5  831.03   11.42
  -5   5   5  815.77   11.58
   5   5  -6  268.31    8.51
  -5   5   6  226.58    8.35
   5   5  -6  285.95   12.79
  -5   5   7  570.66    9.88
   5   5  -7  632.10   12.73
  -5   5   7  488.19    9.32
  -5   5   8   55.50    9.64
   5   5  -8   44.86   15.32
  -5   5   8   73.82    7.61
   5   5  -8   43.49    8.49
   5   5  -9  288.71   14.32
  -5   5   9  236.15    9.20
  -5   5   9  241.21    9.24
   5   5  -9  265.05   11.07
  -5   5  10   34.81    8.32
   5   5 -10   43.61   14.11
   5   5 -10   48.33   10.32
  -5   5  10   49.32    9.44
   5   5 -11  165.38   13.65
  -5   5  11  191.32   11.91
  -5   5  11  164.50   10.50
   5   5 -11  224.53   16.37
   5   6  -1   76.89    7.03
   5   6  -1   76.19   12.25
  -5   6   1   65.64    6.01
  -5   6   2 1044.35   16.09
   5   6  -2  365.35   12.06
   5   6  -2  920.41   10.99
   5   6  -2  978.30   24.72
   5   6  -3  572.41   22.74
   5   6  -3  586.17   23.81
   5   6  -3  550.41    9.30
  -5   6   3  600.11   10.92
   5   6  -4 1343.13   23.70
   5   6  -4 1308.23   13.95
  -5   6   4 1273.47   15.03
   5   6  -4 1530.21   34.52
   5   6  -5   30.26    8.56
   5   6  -5   23.47   13.10
  -5   6   5   22.57    6.96
   5   6  -5   18.94    7.05
   5   6  -6 1517.84   26.15
   5   6  -6 1351.93   16.72
  -5   6   6 1296.61   14.19
  -5   6   7  113.04    7.84
   5   6  -7  140.12   11.69
   5   6  -7  131.10    8.13
  -5   6   7  137.83    7.43
   5   6  -8  532.43   13.13
  -5   6   8  389.86    9.22
  -5   6   8  400.04    9.77
  -5   6   9   70.94    8.01
  -5   6   9   77.28    9.00
   5   6  -9   55.20   10.07
   5   6  -9   76.26   14.53
  -5   6  10  234.95    9.30
   5   6 -10  336.82   15.70
  -5   6  10  226.04   12.51
   5   6 -10  273.14   13.39
  -5   6  11   51.89    9.82
   5   6 -11   30.63   13.53
   5   6 -11   44.77   16.63
  -5   6  11   47.56    8.29
   5   7  -1  853.65   11.75
  -5   7   1  855.06   10.45
   5   7  -1  954.41   22.04
   5   7  -2  245.04    8.69
  -5   7   2  275.80    9.13
  -5   7   3 1078.88   14.59
   5   7  -3 1030.53   12.38
  -5   7   4  530.80   12.14
   5   7  -4  524.02    9.61
   5   7  -5 1164.65   14.30
   5   7  -5 1311.52   29.82
  -5   7   5 1098.85   13.46
   5   7  -5 1267.70   23.31
   5   7  -6  114.39    9.34
   5   7  -6  120.87   14.59
  -5   7   6   86.73    8.34
  -5   7   7  823.49   11.80
   5   7  -7 1023.95   16.85
  -5   7   7  912.67   11.78
   5   7  -7  915.63   19.81
  -5   7   8   45.62    7.95
   5   7  -8   51.45   17.58
  -5   7   8   76.79    7.45
   5   7  -8   49.26    9.33
  -5   7   9  324.95   10.42
   5   7  -9  325.36   12.33
  -5   7   9  313.04   10.58
  -5   7  10   87.34   11.76
   5   7 -10   47.00   13.77
  -5   7  10   24.39   10.04
   5   7 -10   59.35   12.20
  -5   8   1   22.37    6.65
   5   8  -1   11.70   11.42
   5   8  -1   27.64   11.27
   5   8  -2 1363.66   14.14
  -5   8   2 1431.60   19.92
  -5   8   3  485.90   10.54
   5   8  -3  500.94    9.71
  -5   8   4  737.76   12.61
   5   8  -4  800.02   11.48
  -5   8   5  238.04   10.07
   5   8  -5  227.44    8.34
   5   8  -6  760.21   18.82
  -5   8   6  636.05   11.13
   5   8  -6  729.33   21.04
   5   8  -6  664.92   11.49
   5   8  -7  138.98   14.31
  -5   8   7  138.08    9.61
   5   8  -7  133.37    8.58
   5   8  -8  516.25   17.27
  -5   8   8  446.39   10.24
   5   8  -8  490.88   12.54
  -5   8   8  508.69   10.17
  -5   8   9  112.11    8.43
  -5   8   9   79.17    8.20
   5   8  -9   90.39   11.56
   5   8  -9  134.33   14.62
   5   8 -10  149.23   16.62
   5   8 -10  135.56   13.88
  -5   8  10   96.60   10.67
  -5   8  10  128.97   10.28
  -5   9   1 1257.99   13.82
   5   9  -1 1131.14   13.46
   5   9  -1 1061.86   30.48
  -5   9   1 1214.31   20.83
  -5   9   2  130.01    9.40
   5   9  -2  145.28    8.24
   5   9  -3  350.34    9.25
  -5   9   3  346.95   11.64
   5   9  -4   44.94    7.60
  -5   9   4   28.64    9.92
   5   9  -5  377.94    9.38
  -5   9   5  366.77   10.89
   5   9  -6   85.94    7.97
  -5   9   6   95.89    8.23
   5   9  -7  404.17   16.71
  -5   9   7  296.93    8.77
   5   9  -7  377.33   10.81
  -5   9   8   37.32    7.86
  -5   9   8   43.74    9.89
   5   9  -8   44.11   14.22
   5   9  -8   53.87   10.88
  -5   9   9  342.81   10.89
   5   9  -9  439.42   19.04
   5   9  -9  401.45   17.58
  -5   9   9  277.31    9.03
  -5   9  10   25.00   10.09
   5   9 -10   90.59   13.57
   5   9 -10   64.93   15.25
  -5   9  10   35.53    8.37
   5  10  -1   27.30    8.58
  -5  10   1   20.60    9.17
   5  10  -2  672.06   11.53
  -5  10   2  685.15   14.61
  -5  10   3   48.97    8.77
   5  10  -3   19.75    7.82
  -5  10   4  474.95   10.89
   5  10  -4  488.47    9.89
  -5  10   5   10.31    7.55
   5  10  -5   36.05    7.85
  -5  10   6  119.41    8.47
   5  10  -6  184.72    8.46
  -5  10   7   14.61    7.74
   5  10  -7   43.90   10.78
   5  10  -7   21.33    9.92
  -5  10   8  174.94    9.64
   5  10  -8  228.61   11.72
   5  10  -8  249.54   15.52
   5  10  -9   54.93   15.43
  -5  10   9   76.77    9.67
   5  10  -9   44.45   14.68
  -5  10   9   62.31    8.32
  -5  11   1  802.11   18.71
   5  11  -1  709.21   12.33
   5  11  -2    5.94    8.71
  -5  11   3  190.08   10.08
   5  11  -3  204.50    9.22
   5  11  -4   17.83    8.22
  -5  11   4   -0.64    8.20
  -5  11   5  517.11   12.08
   5  11  -5  650.11   12.01
  -5  11   6   71.37   10.41
   5  11  -6   91.49    9.35
   5  11  -7  180.20   10.45
  -5  11   7  166.15    8.76
   5  11  -8    9.49   10.78
  -5  11   8    5.42   10.04
   5  11  -8   -1.87   11.01
  -5  11   9  148.98    9.36
   5  11  -9  212.41   15.03
   5  11  -9  247.51   18.88
  -5  12   1  130.36   11.55
   5  12  -1  123.28    9.11
   5  12  -2  402.01   12.88
  -5  12   3   54.93    9.46
   5  12  -3   54.24    8.89
  -5  12   4  470.10   14.59
   5  12  -4  532.55   11.56
  -5  12   5   99.11    9.83
   5  12  -5  126.67    9.64
  -5  12   6  363.89   10.83
   5  12  -6  443.14   14.43
   5  12  -7   58.26   10.30
  -5  12   7   49.13    8.30
  -5  12   8  194.95    9.56
   5  12  -8  233.58   13.63
   5  12  -9    9.97   11.11
  -5  12   9   20.02    8.29
   5  12  -9   19.78   14.35
   5  13  -1  389.90   10.77
   5  13  -2   66.66    9.66
  -5  13   3  433.89   13.31
   5  13  -3  489.49   12.16
  -5  13   4  221.09   11.01
   5  13  -4  240.52   10.96
  -5  13   5  410.18   12.44
   5  13  -5  456.50   14.30
   5  13  -6  148.16   11.19
  -5  13   6   99.28   10.62
  -5  13   7  207.55    9.77
   5  13  -7  300.60   13.91
   5  13  -8   30.84   12.81
   5  14  -1   49.25    9.63
   5  14  -2  313.01   11.31
   5  14  -3  112.52   10.88
   5  14  -4  430.40   14.86
   5  14  -5   66.74   10.80
   5  14  -6  417.20   16.29
   5  14  -7   97.05   15.58
   5  15  -1  365.61   12.44
   5  15  -2   20.29   12.59
   5  15  -3  272.19   12.26
   5  15  -4   81.06   15.02
   5  15  -5  179.39   13.04
   5  15  -6   25.16   11.92
   5  16  -1    6.32    9.67
   5  16  -2  256.20   12.12
   5  16  -3   14.43   11.21
   5  16  -4  148.09   14.81
   5  16  -5   22.80   14.93
   5  17  -2   67.95   11.49
   5  17  -3   84.84   12.02
   4 -17   1   43.05    8.67
  -4 -17  -1   27.57    9.91
  -4 -17  -1   12.75   18.57
   4 -17   1   60.44   10.18
  -4 -17  -1   21.33   17.51
  -4 -17  -1   49.40    9.17
  -4 -17   0  202.77   10.09
   4 -17   0  267.78   12.94
  -4 -17   0  226.71   11.43
   4 -17   0  256.19   13.12
   4 -17   0   82.79   15.84
  -4 -16  -2   65.53   14.34
  -4 -16  -2   66.22    9.88
   4 -16   2   76.26   10.11
  -4 -16  -2   52.54   13.00
  -4 -16  -2   49.43   11.32
  -4 -16  -1  284.10   10.93
   4 -16   1  282.87    9.97
  -4 -16  -1  245.23   10.48
   4 -16   1  288.90   13.25
   4 -16   0   56.56    8.41
   4 -16   0   66.57    9.44
  -4 -16   0   63.49    9.17
  -4 -16   0   58.17   10.70
   4 -16   0   44.45   13.61
   4 -16   0   36.39   11.92
   4 -15   3   60.22   12.22
  -4 -15  -3   51.93    8.53
  -4 -15  -3   53.83    8.64
  -4 -15  -3   58.64   14.22
   4 -15   2  267.69   10.82
  -4 -15  -2  202.55   14.13
  -4 -15  -2  160.29    9.67
  -4 -15  -2  203.16   10.20
  -4 -15  -1  155.73    9.77
  -4 -15  -1  138.23   12.63
  -4 -15  -1  237.34   19.42
  -4 -15  -1   92.98   10.90
   4 -15   1  201.08    9.88
   4 -15   0  279.40   18.95
   4 -15   0  253.32   13.94
  -4 -15   0  198.88    9.85
   4 -15   0  220.81   10.56
   4 -15   0  402.17   10.70
  -4 -14  -4   62.08    9.08
  -4 -14  -4   82.88    9.04
   4 -14   4   68.46    9.60
  -4 -14  -4   82.34   11.66
  -4 -14  -3   76.37    8.98
   4 -14   3  116.90    9.98
  -4 -14  -3   87.05   10.95
  -4 -14  -3   68.34    9.22
   4 -14   2  182.97    9.70
  -4 -14  -2  119.08    9.40
  -4 -14  -2  121.62    9.55
  -4 -14  -2  132.27   12.70
  -4 -14  -1  101.74   10.59
   4 -14   1  141.33   10.53
  -4 -14  -1  136.83   12.02
  -4 -14  -1  109.65    8.36
   4 -14   0   37.42   11.38
   4 -14   0   56.13   10.14
  -4 -14   0   67.08    8.22
   4 -14   0   54.71    7.85
   4 -14   0   70.00    8.19
  -4 -13  -5   25.00   11.19
  -4 -13  -5   25.50   11.27
  -4 -13  -5   17.82    8.65
   4 -13   5   34.72    9.52
  -4 -13  -4   81.37    9.25
  -4 -13  -4   62.86    9.10
  -4 -13  -4   84.52   11.00
   4 -13   4  107.01   13.21
  -4 -13  -3  118.07    9.01
  -4 -13  -3  112.97   13.39
   4 -13   3  102.45    9.79
  -4 -13  -3   75.83   10.91
  -4 -13  -2  136.54   11.32
  -4 -13  -2  142.67    8.89
  -4 -13  -2  131.16    8.73
   4 -13   2  173.70    8.91
  -4 -13  -1  142.66   11.29
  -4 -13  -1  187.61   10.40
   4 -13   1  176.82    9.06
  -4 -13   0  246.41   17.74
  -4 -13   0  128.29    8.67
   4 -13   0  198.56    8.74
   4 -13   0  193.67   15.70
   4 -13   0  166.39   11.17
  -4 -13   0  191.48   16.71
  -4 -12  -5  149.29   10.16
   4 -12   5  155.77    9.98
  -4 -12  -5  176.93   11.70
  -4 -12  -5  105.77    9.07
  -4 -12  -4   69.49    8.49
  -4 -12  -4  105.80   12.52
   4 -12   4  114.42   11.80
  -4 -12  -4  129.06   12.78
  -4 -12  -3  209.80    9.63
  -4 -12  -3  246.46   10.12
  -4 -12  -3  232.46   14.57
   4 -12   3  247.07    9.01
  -4 -12  -2  133.96   10.76
  -4 -12  -2  113.55    8.38
   4 -12   2  146.96    8.35
   4 -12   1  345.07    9.55
  -4 -12  -1  361.30   12.66
  -4 -12  -1  376.63    9.88
  -4 -12   0  510.80   18.53
   4 -12   0  312.15   10.84
  -4 -12   0  340.52    9.60
   4 -12   0  406.61    9.63
  -4 -12   0  401.11   17.33
   4 -12   0  363.22   17.17
  -4 -11  -6  180.55   12.09
   4 -11   6  134.29   10.63
  -4 -11  -6  145.74    9.82
  -4 -11  -6  104.25    9.44
  -4 -11  -5   72.30   10.63
   4 -11   5   80.43    9.77
  -4 -11  -5   62.76    9.03
  -4 -11  -5   72.31   10.49
   4 -11   4  399.81   12.11
  -4 -11  -4  367.61   10.65
  -4 -11  -4  316.52    9.48
  -4 -11  -4  413.18   14.28
  -4 -11  -3  128.00   11.75
  -4 -11  -3   99.69    8.81
   4 -11   3  102.93    8.18
  -4 -11  -3   84.64    8.59
   4 -11   2  415.83    9.57
  -4 -11  -2  416.99    9.90
  -4 -11  -2  464.22   12.43
   4 -11   1  483.46   11.34
  -4 -11  -1  409.94   10.21
  -4 -11  -1  431.57   12.75
   4 -11   0  706.87   15.92
   4 -11   0  712.10   18.88
   4 -11   0  854.44   11.49
  -4 -11   0  830.31   19.05
  -4 -11   0  760.55   11.84
   4 -10   6   95.94   10.50
  -4 -10  -6   94.31    9.38
  -4 -10  -6  120.74   11.67
  -4 -10  -6   77.63    9.10
  -4 -10  -5  377.32   11.18
  -4 -10  -5  403.34   11.86
  -4 -10  -5  272.57   10.09
   4 -10   5  360.37   10.52
  -4 -10  -4  137.48   10.02
  -4 -10  -4  107.10   11.52
  -4 -10  -4  162.27    9.62
   4 -10   4   99.22    8.17
  -4 -10  -3  286.20   10.04
   4 -10   3  309.14    9.21
  -4 -10  -3  353.38   11.88
  -4 -10  -2   28.11    8.07
  -4 -10  -2   38.35    8.80
   4 -10   2   31.80    7.78
   4 -10   1  845.49   26.93
   4 -10   1  872.71   33.76
  -4 -10  -1 1004.57   16.67
   4 -10   1 1082.00   12.95
  -4 -10  -1 1007.97   14.48
   4 -10   0  280.40    9.77
   4 -10   0  310.45    7.89
  -4 -10   0  342.60   12.35
  -4 -10   0  276.70    9.07
   4  -9   7   89.82   13.03
  -4  -9  -7   73.81   11.02
  -4  -9  -7   44.54    9.71
  -4  -9  -6  449.72   13.10
   4  -9   6  360.46   12.96
  -4  -9  -6  267.06   10.17
  -4  -9  -6  335.14   10.88
  -4  -9  -5  108.17    9.35
  -4  -9  -5  132.35   12.45
  -4  -9  -5  125.69    9.53
   4  -9   5  106.15    8.78
   4  -9   4  267.16    9.58
  -4  -9  -4  286.89   10.94
  -4  -9  -4  293.06    9.41
  -4  -9  -4  232.04    9.09
   4  -9   3  104.73    8.00
  -4  -9  -3   74.57    8.44
  -4  -9  -3   92.23    9.59
   4  -9   2  474.47    9.31
  -4  -9  -2  407.25    9.48
  -4  -9  -2  468.13   12.13
  -4  -9  -1  197.85   12.65
   4  -9   1  239.85    7.55
   4  -9   1  181.00   12.25
  -4  -9  -1  219.02    8.96
   4  -9   0  408.39   10.59
   4  -9   0  333.06   10.13
  -4  -9   0  419.48   14.13
  -4  -9   0  365.04    9.33
  -4  -8  -7  164.09   10.94
  -4  -8  -7  210.60   12.17
  -4  -8  -7  220.59   11.26
   4  -8   7  246.28   11.67
   4  -8   6   79.12    9.15
  -4  -8  -6   80.61    8.45
  -4  -8  -6   47.60   10.38
  -4  -8  -6   78.10   12.94
  -4  -8  -5  170.02    8.91
  -4  -8  -5  107.22   10.38
   4  -8   5  122.78    9.02
  -4  -8  -5  181.75   10.58
  -4  -8  -4  186.54    9.11
   4  -8   4  149.03    8.75
  -4  -8  -4  193.76   11.95
  -4  -8  -4  128.50    8.62
   4  -8   3  402.89   11.07
  -4  -8  -3  350.64   10.99
  -4  -8  -3  361.24    9.39
   4  -8   2  125.65    7.72
  -4  -8  -2  143.92    7.93
  -4  -8  -2  134.44    9.45
  -4  -8  -1  317.74    9.49
   4  -8   1  245.63   11.75
   4  -8   1  323.85   10.18
  -4  -8  -1  298.97   10.92
   4  -8   0  298.99    9.80
   4  -8   0  254.42    8.77
  -4  -8   0  314.47   10.94
  -4  -8   0  309.27    9.24
  -4  -7  -7   74.70   10.66
   4  -7   7   57.14    9.81
  -4  -7  -7   49.52   11.61
  -4  -7  -7   70.36   10.19
   4  -7   6  155.89   10.05
  -4  -7  -6  140.56   10.47
  -4  -7  -6  121.64    8.88
  -4  -7  -6  196.79   10.97
  -4  -7  -5   80.95    8.21
  -4  -7  -5  109.78   12.08
   4  -7   5   88.19    8.60
  -4  -7  -5   62.05   10.01
  -4  -7  -4  216.69   10.14
  -4  -7  -4  211.52    9.82
  -4  -7  -4  259.87    9.48
   4  -7   4  213.94    9.63
   4  -7   3  136.73    8.54
  -4  -7  -3  141.48    8.76
  -4  -7  -3  152.04    9.64
  -4  -7  -2  614.41   10.80
  -4  -7  -2  616.10   11.65
   4  -7   2  513.41    9.07
   4  -7   1  749.16   15.68
  -4  -7  -1  857.73   12.11
   4  -7   1  890.12   10.64
  -4  -7  -1  915.24   14.36
  -4  -7   0  618.39   12.97
   4  -7   0  557.13   12.23
  -4  -7   0  561.13    9.77
   4  -7   0  466.98    8.03
  -4  -6  -7  111.14   10.97
  -4  -6  -7   70.96   11.65
  -4  -6  -7   67.05    9.59
   4  -6   7   87.16   11.05
  -4  -6  -6  134.75   12.29
   4  -6   6  118.69   10.38
  -4  -6  -6  111.21    9.31
  -4  -6  -6  117.82   11.96
  -4  -6  -5  220.92   11.52
  -4  -6  -5  237.51   10.61
   4  -6   5  184.99    9.20
  -4  -6  -5  172.29   11.77
   4  -6   4  309.27    9.02
  -4  -6  -4  312.05    9.75
  -4  -6  -4  332.53   10.00
  -4  -6  -4  255.12    9.83
  -4  -6  -3  800.01   13.11
   4  -6   3  824.07   12.57
  -4  -6  -3  808.39   12.38
  -4  -6  -2  688.81   12.41
   4  -6   2  666.88   17.40
  -4  -6  -2  663.19   11.50
   4  -6   2  735.53   10.05
   4  -6   1  666.38    9.20
  -4  -6  -1  759.15   14.76
  -4  -6  -1  511.07    9.75
   4  -6   1  511.47   11.28
  -4  -6   0  456.01    9.18
   4  -6   0  576.48   12.19
  -4  -6   0  646.47   14.80
   4  -6   0  559.53    8.43
  -4  -5  -7  152.15    9.84
  -4  -5  -7  114.29    9.65
   4  -5   7  123.39   12.47
  -4  -5  -7  103.03   10.55
  -4  -5  -6  112.82   11.72
  -4  -5  -6  154.98   10.84
  -4  -5  -6  165.10    9.60
   4  -5   6  110.08   10.46
   4  -5   5   94.24   11.14
  -4  -5  -5  141.49    8.71
  -4  -5  -5  112.24   11.96
  -4  -5  -5  102.50    9.45
  -4  -5  -4  373.49   10.60
  -4  -5  -4  506.65   10.89
  -4  -5  -4  426.11   10.68
   4  -5   4  449.83    9.82
  -4  -5  -3  357.73    9.84
  -4  -5  -3  402.78   10.22
   4  -5   3  365.76    9.07
  -4  -5  -2  916.59   12.02
   4  -5   2  935.26   17.17
   4  -5   2  991.01   11.49
  -4  -5  -2  959.04   13.87
   4  -5   1  339.41    7.50
  -4  -5  -1  336.85    8.97
  -4  -5  -1  369.35   10.71
   4  -5   1  279.70    8.81
   4  -5   0 2429.07   17.53
  -4  -5   0 2513.17   19.09
   4  -5   0 2213.46   22.30
  -4  -5   0 2855.03   25.47
   4  -4   8   69.02   10.55
  -4  -4  -8   85.07    9.59
  -4  -4  -8   46.05   12.81
  -4  -4  -8   49.35   10.01
  -4  -4  -7  236.35   10.00
  -4  -4  -7  186.03   11.58
  -4  -4  -7  228.00   10.90
   4  -4   7  246.12   10.76
  -4  -4  -6   42.98    8.62
  -4  -4  -6   32.09    9.04
   4  -4   6   22.59    9.95
  -4  -4  -6   17.18    9.41
   4  -4   5  520.89   11.17
  -4  -4  -5  500.57   11.21
  -4  -4  -5  516.18   10.35
  -4  -4  -5  552.92   14.49
  -4  -4  -4  503.40   14.18
  -4  -4  -4  473.46   10.56
  -4  -4  -4  518.32   10.66
   4  -4   4  467.23    9.82
  -4  -4  -3 1535.34   16.75
   4  -4   3 1376.56   14.11
  -4  -4  -3 1461.60   17.05
   4  -4   2  228.36    8.98
  -4  -4  -2  249.96   11.66
   4  -4   2  260.86    7.72
  -4  -4  -2  229.91    8.75
  -4  -4  -1  303.24    9.86
   4  -4   1  254.06    9.54
  -4  -4  -1  263.00    8.64
   4  -4   1  267.41    7.17
   4  -4   0  346.48    7.49
  -4  -4   0  308.11    8.60
   4  -4   0  313.50    8.65
  -4  -4   0  357.64   10.09
  -4  -3  -8  174.47   12.69
  -4  -3  -8  168.56   10.20
  -4  -3  -8  129.04   11.21
   4  -3   8  159.76   10.71
  -4  -3  -7   71.94   10.89
  -4  -3  -7  120.62   10.50
   4  -3   7   84.73    9.60
  -4  -3  -7  100.08   10.00
   4  -3   6  493.82   11.51
  -4  -3  -6  397.56   10.56
  -4  -3  -6  440.15   10.94
  -4  -3  -6  412.95   11.54
   4  -3   5  102.17    9.75
  -4  -3  -5  115.32    9.72
  -4  -3  -5  100.19    9.10
  -4  -3  -5  112.48    8.36
   4  -3   4  687.42   11.05
  -4  -3  -4  765.58   14.44
  -4  -3  -4  731.95   12.65
  -4  -3  -4  747.85   12.13
   4  -3   3   82.16    8.08
  -4  -3  -3   78.88    8.39
  -4  -3  -3   70.91    8.04
   4  -3   3   76.77   10.63
   4  -3   2  646.06    9.81
  -4  -3  -2  649.24   11.67
   4  -3   2  678.09   14.32
  -4  -3  -2  582.95   10.89
   4  -3   1  173.76    9.86
  -4  -3  -1  186.49    8.75
  -4  -3  -1  169.64    7.98
   4  -3   1  179.43    7.08
   4  -3   0 1536.71   13.58
   4  -3   0 1196.88   14.12
  -4  -3   0 1702.42   17.73
  -4  -3   0 1491.79   15.88
  -4  -2  -8   44.69   10.26
   4  -2   8   46.61   10.09
  -4  -2  -8   62.43   11.65
  -4  -2  -8   76.89   12.45
  -4  -2  -7  242.97   10.54
  -4  -2  -7  305.24   11.27
  -4  -2  -7  234.40   10.45
   4  -2   7  216.99   11.18
  -4  -2  -6   42.43   11.34
  -4  -2  -6   51.55   11.02
  -4  -2  -6  113.70   12.41
   4  -2   6   76.35    9.34
  -4  -2  -5  482.70   11.67
  -4  -2  -5  513.72   10.54
   4  -2   5  488.04   13.05
  -4  -2  -5  406.17   10.51
  -4  -2  -4  178.65   11.82
  -4  -2  -4  201.73    9.15
   4  -2   4  209.88    8.93
  -4  -2  -4  183.87    9.74
   4  -2   3  897.57   12.22
   4  -2   3  859.05   13.89
  -4  -2  -3  988.37   15.77
  -4  -2  -3  889.68   12.95
  -4  -2  -2  119.42    8.04
   4  -2   2  126.44    9.89
   4  -2   2  122.41    9.38
  -4  -2  -2  123.07    8.59
  -4  -2  -1  664.07   11.45
   4  -2   1  648.44   11.21
  -4  -2  -1  614.84   10.42
   4  -2   1  539.35   10.26
  -4  -2   0 1255.80   13.33
   4  -2   0 1306.32   13.96
   4  -2   0 1176.13   14.60
  -4  -2   0 1460.52   17.09
   4  -1   8   99.17   10.12
  -4  -1  -8   99.90   10.36
  -4  -1  -8  106.12   11.45
  -4  -1  -8   78.93   10.49
  -4  -1  -7   71.44    9.60
   4  -1   7   80.08    9.78
  -4  -1  -7   83.30   10.47
  -4  -1  -7   72.48   12.83
   4  -1   6  386.60   10.57
  -4  -1  -6  403.04   12.53
  -4  -1  -6  387.19   11.33
  -4  -1  -6  334.28   11.17
   4  -1   5  195.80   10.36
  -4  -1  -5  174.60   11.77
  -4  -1  -5  224.01    9.36
  -4  -1  -5  227.60   13.22
  -4  -1  -4  274.27    9.30
   4  -1   4  236.68    9.21
  -4  -1  -4  288.31   10.48
  -4  -1  -4  251.14   11.58
  -4  -1  -3  334.26    9.65
  -4  -1  -3  303.44    9.60
   4  -1   3  312.32   10.10
   4  -1   3  315.26   10.93
   4  -1   2  899.83   11.68
   4  -1   2  834.99   12.92
  -4  -1  -2  959.76   12.65
  -4  -1  -2  842.70   12.23
   4  -1   1  785.58   11.78
  -4  -1  -1  759.19   11.57
  -4  -1  -1  911.41   12.33
   4  -1   1  843.19   10.86
   4  -1   0 1589.55   14.99
  -4  -1   0 1571.04   15.10
   4  -1   0 1297.92   13.82
  -4  -1   0 1723.92   16.62
  -4   0  -8   63.72   10.60
  -4   0  -8   84.74   10.66
  -4   0  -8   87.02   14.12
  -4   0  -7  219.74   14.14
  -4   0  -7  181.73   11.90
  -4   0  -7  285.74   10.69
  -4   0  -6  109.45    9.13
  -4   0  -6  140.32   11.93
  -4   0  -6   76.53    9.29
  -4   0  -5   67.49    8.50
  -4   0  -5   75.28    9.96
  -4   0  -5   43.71    8.85
  -4   0  -4  572.98   11.35
  -4   0  -4  545.23   11.61
  -4   0  -4  315.37   10.20
  -4   0  -3  803.15   13.92
  -4   0  -3  924.96   12.70
  -4   0  -2  188.76    8.38
  -4   0  -2  196.53    8.34
  -4   0  -1 1074.23   13.32
  -4   0  -1 1063.04   12.53
  -4   0   0 3038.52   23.58
  -4   0   0 3194.07   24.13
  -4   0   1 2465.73   20.90
  -4   0   1 2333.69   20.45
  -4   0   2 2492.08   25.11
  -4   0   2 2512.32   21.38
  -4   0   3 1673.12   16.38
  -4   0   4  452.30    8.70
  -4   0   4  452.44   10.44
  -4   0   5  417.25   10.32
  -4   0   5  438.33   10.70
  -4   0   6  289.73    8.12
  -4   0   6  386.11    9.28
  -4   0   7 1136.64   13.67
  -4   0   7 1278.58   16.47
  -4   0   8  241.10    9.78
  -4   0   8  228.46    8.79
  -4   0   9  157.31    8.57
  -4   0   9  144.11    9.75
  -4   0  10   52.65    9.52
  -4   0  10   58.86    8.45
  -4   0  11  218.16   10.43
  -4   0  11  202.05   11.08
  -4   1   1 1258.86   14.77
  -4   1   1 1105.54   12.23
   4   1  -1 1253.35   14.84
   4   1  -1 1116.86   12.53
  -4   1   2 2412.67   23.11
   4   1  -2 2266.45   19.05
   4   1  -2 2493.44   24.94
  -4   1   2 2437.55   22.98
  -4   1   3 1075.32   12.68
   4   1  -3 1112.77   14.87
   4   1  -3 1061.13   12.25
   4   1  -3 1094.67   15.40
   4   1  -4 1574.50   18.97
  -4   1   4 1700.64   17.22
  -4   1   4 1580.05   17.32
   4   1  -4 1625.51   15.76
  -4   1   5  465.25    8.90
   4   1  -5  472.05   10.16
  -4   1   5  459.76    8.98
   4   1  -5  499.98    8.99
   4   1  -6 1308.73   14.50
  -4   1   6 1245.60   13.58
   4   1  -6 1261.11   16.00
  -4   1   6 1314.73   14.91
   4   1  -7  285.01    8.75
   4   1  -7  312.87    9.33
  -4   1   7  292.09    8.64
  -4   1   7  313.78    8.95
   4   1  -8  255.24    8.76
  -4   1   8  251.58    8.80
  -4   1   8  292.37    9.52
   4   1  -8  259.76    9.49
  -4   1   9   94.98    8.69
  -4   1   9  100.81    8.28
   4   1  -9   96.54   10.18
   4   1  -9  107.24   10.71
   4   1 -10  284.40   10.85
   4   1 -10  287.80   14.47
  -4   1  10  284.38   11.76
  -4   1  10  319.43   11.95
   4   1 -11   54.26   12.15
  -4   1  11   94.34   10.00
   4   1 -11   87.96    9.71
  -4   1  11   67.68    8.86
  -4   2   1  221.53    7.61
   4   2  -1  239.98    8.61
   4   2  -1  225.72    7.14
  -4   2   1  193.42    7.78
  -4   2   2  633.87    9.55
   4   2  -2  674.56   11.72
   4   2  -2  626.90    9.47
  -4   2   2  663.93   10.48
   4   2  -3 2427.86   20.15
   4   2  -3 2656.77   27.90
  -4   2   3 2403.51   21.57
   4   2  -4  372.43    7.97
  -4   2   4  355.05    8.28
   4   2  -5 1213.69   13.63
  -4   2   5 1208.20   13.71
  -4   2   5 1201.68   12.77
   4   2  -5 1225.36   16.93
  -4   2   6  300.22    7.99
   4   2  -6  307.99    8.56
  -4   2   6  296.47    8.42
   4   2  -6  186.87    8.59
   4   2  -7  974.35   14.70
   4   2  -7  992.92   14.68
  -4   2   7  916.59   12.24
  -4   2   7  980.30   12.79
   4   2  -8  318.23    9.28
  -4   2   8  308.17    9.26
   4   2  -8  317.32   10.44
  -4   2   8  335.49   10.36
   4   2  -9  267.76   12.92
  -4   2   9  233.74    9.19
  -4   2   9  299.26   11.76
   4   2  -9  246.42   10.86
   4   2 -10  123.48    9.82
   4   2 -10  124.52   10.38
  -4   2  10   83.37    8.48
  -4   2  10  102.11    9.12
  -4   2  11  123.62   12.63
   4   2 -11  123.27   10.94
   4   2 -11   98.45   10.32
  -4   2  11  106.57    8.80
   4   3  -1  820.34   10.51
   4   3  -1  896.25   14.41
  -4   3   1  788.09    9.50
  -4   3   1  884.07   13.09
   4   3  -2 1200.38   12.63
   4   3  -2 1374.10   18.58
  -4   3   2 1208.19   14.77
   4   3  -3  472.92    8.61
   4   3  -3  525.44   11.96
   4   3  -3  458.98   11.25
  -4   3   3  460.09    8.76
  -4   3   4 2167.07   19.02
   4   3  -4 2262.32   20.38
   4   3  -5  771.56   11.08
  -4   3   5  734.09   10.33
  -4   3   5  752.64   10.25
  -4   3   6  749.13   10.98
  -4   3   6  782.81   10.75
   4   3  -6  798.05   11.62
   4   3  -6  787.56   16.24
   4   3  -7   68.63    7.91
  -4   3   7   70.16    8.01
   4   3  -7   52.59    8.51
  -4   3   7   84.01    7.71
   4   3  -8  399.29    9.98
  -4   3   8  384.01    9.97
   4   3  -8  391.76   11.70
  -4   3   8  336.66    9.06
   4   3  -9   89.46   10.90
  -4   3   9  118.83    8.63
  -4   3   9  109.04    7.75
   4   3  -9   67.01    9.15
   4   3 -10  314.56   11.62
  -4   3  10  336.07   10.58
   4   3 -10  276.87   11.67
  -4   3  10  315.06    9.27
  -4   3  11   77.66    9.78
  -4   3  11   89.44   10.63
   4   3 -11   26.46   11.02
   4   3 -11   70.92   10.28
  -4   4   1 1133.81   11.42
   4   4  -1 1098.30   11.96
  -4   4   1 1250.17   17.74
   4   4  -1 1229.09   20.44
  -4   4   2  112.29    6.81
   4   4  -2  162.74    8.82
   4   4  -2  135.79    7.86
   4   4  -2  154.59    6.65
   4   4  -3 3458.02   45.50
  -4   4   3 3508.88   29.40
   4   4  -3 3838.34   39.23
   4   4  -3 3469.99   25.68
  -4   4   4  480.83    9.16
   4   4  -4  478.22    9.07
   4   4  -4  504.66   13.52
   4   4  -5  915.53   12.34
  -4   4   5  846.07   10.86
  -4   4   5  879.97   10.80
   4   4  -6  429.59    9.45
  -4   4   6  385.29    9.01
  -4   4   6  388.54    9.07
  -4   4   7  602.93   10.03
  -4   4   7  663.66   10.71
   4   4  -7  662.53   16.76
   4   4  -7  670.15   13.66
  -4   4   8   71.94   10.31
   4   4  -8   57.11    8.24
  -4   4   8   32.85    8.88
   4   4  -8   47.10    9.95
  -4   4   9  280.58    9.24
   4   4  -9  239.91   10.81
  -4   4   9  220.05    8.13
   4   4  -9  249.67   11.09
   4   4 -10  109.12   10.55
  -4   4  10  123.06   10.70
  -4   4  10   92.66    7.91
   4   4 -10  109.48   10.31
  -4   4  11   57.62    9.16
   4   4 -11   79.13   13.68
   4   4 -11   41.12   12.20
  -4   4  11   51.74    9.79
   4   5  -1 1040.73   11.93
  -4   5   1 1057.16   10.91
   4   5  -1 1050.72   21.53
  -4   5   1 1095.70   15.54
   4   5  -2 1091.81   22.99
  -4   5   2 1621.74   19.52
   4   5  -2 1429.22   13.91
   4   5  -2 1506.27   30.34
   4   5  -3  865.45   23.52
   4   5  -3  880.56   19.12
   4   5  -3  767.80   10.62
  -4   5   3  776.88   11.50
   4   5  -4  750.99   10.71
  -4   5   4  725.00   10.80
   4   5  -4  829.58   21.70
   4   5  -5  397.47    9.09
  -4   5   5  410.51    8.44
   4   5  -5  457.99   16.15
  -4   5   5  369.82    8.46
  -4   5   6  593.20   10.29
   4   5  -6  633.44   10.99
  -4   5   6  566.13   12.49
  -4   5   7  168.93    7.47
   4   5  -7  187.73    8.81
  -4   5   7  198.50    8.26
   4   5  -7  154.58   10.93
  -4   5   8  408.25    9.39
  -4   5   8  458.15   10.76
   4   5  -8  500.89   12.16
   4   5  -8  504.71   15.67
   4   5  -9   82.14   10.28
  -4   5   9   64.77    7.59
   4   5  -9   58.01   10.76
  -4   5   9   86.43    9.53
   4   5 -10  236.75   12.75
  -4   5  10  232.74    9.54
   4   5 -10  277.14   12.06
  -4   5  10  254.59   11.18
   4   5 -11  110.74   16.08
  -4   5  11   94.77   10.25
  -4   5  11   72.37    9.24
   4   5 -11  110.73   12.07
   4   6  -1 1004.21   22.92
   4   6  -1  957.23   11.78
  -4   6   1  964.30   10.45
  -4   6   2  700.28   12.04
   4   6  -2  608.34    9.91
  -4   6   3  679.18   10.99
   4   6  -3  666.58   10.05
   4   6  -4  700.69   16.81
   4   6  -4  596.70   20.61
  -4   6   4  601.84   10.29
   4   6  -4  636.29   10.29
   4   6  -5  777.77   11.79
  -4   6   5  824.37   11.44
  -4   6   5  836.19   11.03
   4   6  -5  854.56   18.32
  -4   6   6  477.21    9.09
  -4   6   6  443.98    9.32
   4   6  -6  511.78   17.06
   4   6  -6  477.17   10.19
  -4   6   7  545.11    9.61
  -4   6   7  630.65   10.24
   4   6  -7  681.05   13.01
   4   6  -8  166.10   10.20
  -4   6   8  168.19    8.13
   4   6  -8  154.48   15.25
  -4   6   8  143.84    9.35
   4   6  -9  289.25   12.46
  -4   6   9  302.35   10.85
   4   6  -9  361.31   14.85
  -4   6   9  247.87    9.49
   4   6 -10   86.46   12.30
  -4   6  10   84.68    9.84
   4   6 -10   74.43   13.21
  -4   6  10   86.65    8.52
  -4   6  11   57.76   10.81
  -4   6  11   74.70    8.95
   4   6 -11   72.86   15.27
   4   6 -11   91.59   12.04
   4   7  -1  352.43   15.12
   4   7  -1  366.95    8.65
  -4   7   1  333.91    7.15
  -4   7   2  299.11    9.32
   4   7  -2  304.92    8.29
   4   7  -3  971.47   12.63
  -4   7   3  952.15   13.51
   4   7  -4  580.28   10.32
  -4   7   4  541.79   10.24
  -4   7   5  417.99    9.36
   4   7  -5  372.71   13.31
   4   7  -5  398.37    8.93
  -4   7   6 1110.46   13.09
   4   7  -6 1217.28   16.38
  -4   7   6 1169.89   12.36
   4   7  -6 1317.34   23.36
  -4   7   7  462.09    9.56
   4   7  -7  519.00   12.07
   4   7  -7  496.19   14.24
  -4   7   7  416.02    9.01
  -4   7   8  417.34    9.73
   4   7  -8  463.20   13.17
  -4   7   8  476.51   10.77
  -4   7   9  162.74    8.93
  -4   7   9  201.21   10.12
   4   7  -9  204.84   15.72
   4   7  -9  202.87   12.93
  -4   7  10   97.01    8.78
  -4   7  10  126.57   10.70
   4   7 -10  162.37   19.58
   4   7 -10  126.69   16.12
  -4   8   1  706.35    9.38
   4   8  -1  797.04   11.16
   4   8  -1  601.41   23.10
   4   8  -2 1046.44   12.87
  -4   8   2 1057.93   15.84
   4   8  -3  494.60    9.87
  -4   8   3  489.92   10.54
   4   8  -4  425.76    9.40
  -4   8   4  475.82    9.90
  -4   8   5  766.95   12.77
   4   8  -5  732.42   17.39
   4   8  -5  738.90   11.75
  -4   8   6  673.78   11.28
   4   8  -6  762.49   18.20
  -4   8   6  738.65   11.78
   4   8  -6  670.97   12.44
  -4   8   7  463.68   12.82
  -4   8   7  353.87    9.62
   4   8  -7  411.70   11.58
   4   8  -7  398.74   13.69
  -4   8   8  125.70    8.71
   4   8  -8  119.43   10.02
   4   8  -8  125.22   11.75
  -4   8   8   79.62    7.79
  -4   8   9  172.74    8.83
   4   8  -9  185.81   13.86
  -4   8   9  186.31   10.43
  -4   8  10   23.68    8.57
  -4   8  10   29.78    9.97
   4   8 -10   36.37   13.56
   4   8 -10   55.98   21.18
   4   9  -1   64.24    8.33
  -4   9   1  106.40    8.38
   4   9  -2 1055.13   14.97
  -4   9   2  852.06   14.67
  -4   9   3  333.27    9.53
   4   9  -3  356.30    9.25
   4   9  -4 1202.71   14.98
  -4   9   4 1187.25   17.65
   4   9  -5  199.98   10.85
  -4   9   5  170.63    9.72
   4   9  -6  637.29   12.43
   4   9  -6  672.73   17.41
  -4   9   6  587.90   13.16
  -4   9   7   82.49    7.88
   4   9  -7  124.50   13.09
   4   9  -7  115.49    9.63
  -4   9   7  108.84    7.93
  -4   9   8  191.96    9.72
   4   9  -8  204.29   13.74
   4   9  -8  195.12   11.11
  -4   9   8  195.90    9.12
  -4   9   9  138.08    9.92
  -4   9   9  147.69   12.17
   4   9  -9  127.30   14.29
   4   9  -9  128.52   13.83
  -4   9  10   74.71   10.71
   4   9 -10   73.69   17.94
  -4   9  10   57.87    8.86
   4  10  -1  930.72   13.91
  -4  10   1 1067.95   19.66
   4  10  -2  522.72   12.55
  -4  10   2  477.76   11.85
   4  10  -3  796.70   12.96
  -4  10   3  762.34   15.76
   4  10  -4   51.60    7.93
  -4  10   4   27.96    8.35
  -4  10   5  533.05   10.92
   4  10  -5  658.08   14.99
  -4  10   6   -4.88    8.00
   4  10  -6   10.86    8.41
   4  10  -6    9.92    9.10
   4  10  -7  175.48   13.00
   4  10  -7  146.51   11.63
  -4  10   7  153.50    7.94
  -4  10   7  170.60    8.13
  -4  10   8   18.80    8.46
   4  10  -8   38.46   15.11
   4  10  -8   12.20   10.55
  -4  10   8    3.57   11.45
  -4  10   9  205.68    9.59
   4  10  -9  299.65   17.89
  -4  10   9  253.40   13.29
   4  10  -9  257.53   17.59
   4  10 -10   60.97   14.31
   4  11  -1  171.47    8.73
  -4  11   1  189.71   13.26
   4  11  -2  668.56   13.79
  -4  11   2  656.83   14.05
   4  11  -3  212.68    9.66
  -4  11   3  175.13    9.61
   4  11  -4  832.37   15.32
  -4  11   4  742.39   12.97
  -4  11   5   46.44    8.73
   4  11  -5   76.80    9.37
  -4  11   6  203.80    9.42
   4  11  -6  243.34   12.69
  -4  11   7   50.48    8.05
   4  11  -7   31.54   11.17
   4  11  -7   37.88    9.80
   4  11  -8  252.60   14.96
   4  11  -8  254.57   14.90
  -4  11   8  212.46    9.96
  -4  11   8  228.49    9.60
  -4  11   9   59.15   12.40
   4  11  -9   58.90   12.84
   4  11  -9   81.17   11.79
   4  12  -1  282.41    9.69
   4  12  -2  276.92   12.01
   4  12  -3  526.53   11.60
  -4  12   3  469.92   14.01
  -4  12   4  189.19    9.85
   4  12  -4  242.65   10.72
  -4  12   5  237.05    9.99
   4  12  -5  227.99   11.34
  -4  12   6  171.78   10.59
   4  12  -6  151.13   13.11
   4  12  -7  216.20   13.60
  -4  12   7  227.00    9.22
   4  12  -7  263.78   13.23
   4  12  -8   77.03   12.24
   4  12  -8   52.36   11.56
   4  12  -9  192.54   14.57
  -4  12   9  201.15   10.71
   4  12  -9  166.40   16.66
   4  13  -1  104.24   11.33
   4  13  -2  382.50   10.96
   4  13  -3  505.32   11.99
   4  13  -4  296.17   15.03
   4  13  -5  347.73   11.74
   4  13  -6  240.75   15.07
   4  13  -7  227.85   16.18
   4  13  -8  139.07   15.61
   4  14  -1  222.07   10.51
   4  14  -2  195.59   10.48
   4  14  -3  361.82   14.35
   4  14  -4  348.32   12.34
   4  14  -5  246.49   16.08
   4  14  -6  155.36   15.94
   4  14  -7  140.40   17.04
   4  15  -1  126.59    9.87
   4  15  -2  218.16   11.71
   4  15  -3  146.96   14.57
   4  15  -4  345.59   13.77
   4  15  -5   18.88   13.46
   4  15  -6  258.18   16.13
   4  15  -7   66.44   13.40
   4  16  -2  124.19   11.06
   4  16  -3  209.61   16.89
   4  16  -4   16.22   14.74
   4  16  -5  217.49   18.27
   4  16  -6   26.97   13.14
   4  17  -4  196.19   13.47
  -3 -18  -1   64.63   16.60
  -3 -18  -1  106.40   11.04
  -3 -18  -1  102.66   14.39
   3 -18   1  109.56    9.11
   3 -18   1  153.33   11.50
  -3 -18  -1  101.31   15.88
   3 -18   0   45.70   12.21
  -3 -18   0   50.10   10.43
  -3 -18   0   64.14   13.95
   3 -18   0   38.62   12.82
   3 -18   0   48.54    8.64
   3 -18   0   42.78   12.80
  -3 -17  -2   79.17    9.99
   3 -17   2  146.99   11.02
  -3 -17  -2  103.35   12.27
   3 -17   2   32.79    8.07
  -3 -17  -2  173.92   16.77
  -3 -17  -2   80.51   12.31
  -3 -17  -1  202.59   10.52
  -3 -17  -1  275.33   19.61
  -3 -17  -1  197.28   11.57
   3 -17   1  296.47   13.14
  -3 -17  -1  119.10   13.39
   3 -17   1  166.67   10.56
   3 -17   0  304.01   12.58
   3 -17   0  238.12   12.04
  -3 -17   0  177.39   13.67
   3 -17   0  157.81   13.49
  -3 -17   0  205.35   12.57
   3 -17   0  151.55   12.54
  -3 -16  -3  263.77   15.58
   3 -16   3  220.52   13.74
  -3 -16  -3  154.26   10.52
  -3 -16  -3  175.13   12.70
  -3 -16  -3  122.87   10.47
  -3 -16  -2  366.35   18.05
   3 -16   2  161.10    8.73
   3 -16   2  336.86   11.57
  -3 -16  -2  237.86   13.45
  -3 -16  -2  228.79   12.41
  -3 -16  -2  257.76   14.32
   3 -16   1  391.06   13.31
  -3 -16  -1  439.00   20.59
  -3 -16  -1  270.31   16.60
   3 -16   1  138.99    8.57
  -3 -16  -1  339.52   12.13
  -3 -16  -1  287.46   11.39
   3 -16   0  241.60   16.15
  -3 -16   0  237.27   10.25
  -3 -16   0  262.30   13.67
  -3 -16   0  180.44   20.41
   3 -16   0  275.12    9.17
   3 -16   0  360.66   12.30
   3 -16   0  232.14   12.65
  -3 -15  -4  130.84   12.51
  -3 -15  -4   63.29    8.94
  -3 -15  -4  104.06    9.48
   3 -15   4   91.14   11.60
   3 -15   3  188.10   10.57
  -3 -15  -3  147.35   16.39
  -3 -15  -3  106.44    9.60
  -3 -15  -3  162.45   12.80
  -3 -15  -2  386.44   15.25
  -3 -15  -2  268.01   10.11
   3 -15   2  346.32   10.70
  -3 -15  -2  243.76   12.79
  -3 -15  -2  260.70   12.30
   3 -15   1  239.72    8.76
  -3 -15  -1  302.17   13.61
  -3 -15  -1  209.17   14.39
  -3 -15  -1  225.68   10.73
  -3 -15  -1  226.93   11.68
   3 -15   1  281.27   10.52
   3 -15   0  217.82   11.09
   3 -15   0  165.58   14.31
  -3 -15   0  158.71    9.28
  -3 -15   0  132.63   14.99
  -3 -15   0  179.72   10.67
   3 -15   0  151.05    9.97
  -3 -15   0  186.87   14.68
   3 -15   0  150.09   11.20
   3 -14   5   90.41   11.35
  -3 -14  -5   66.49    9.31
  -3 -14  -5   60.68   11.58
  -3 -14  -5   79.60    9.66
  -3 -14  -4   75.57    9.05
  -3 -14  -4  108.84    9.71
  -3 -14  -4  118.96   11.90
   3 -14   4  121.21   11.77
  -3 -14  -3  185.95   10.07
   3 -14   3  163.82    9.57
  -3 -14  -3  141.27    9.10
  -3 -14  -3  200.78   12.44
  -3 -14  -2   47.37   13.55
  -3 -14  -2   48.84    8.68
  -3 -14  -2   34.01    8.39
   3 -14   2   58.60   10.56
   3 -14   1   86.44    8.26
   3 -14   1   44.13   12.74
  -3 -14  -1   74.29    8.19
   3 -14   1   36.40   13.84
  -3 -14  -1   58.34   11.16
  -3 -14  -1   60.35   13.18
  -3 -14  -1   86.72   12.00
   3 -14   0  130.67   11.91
   3 -14   0  136.88    7.66
   3 -14   0  148.57    8.00
  -3 -14   0  138.29    8.64
  -3 -14   0  122.85   13.97
  -3 -14   0  170.01   13.61
   3 -14   0  119.76   10.65
   3 -13   6   40.08   11.58
  -3 -13  -6   51.62   13.22
  -3 -13  -6   38.84   11.09
  -3 -13  -6   20.38   11.11
  -3 -13  -5   38.99    9.41
  -3 -13  -5   51.80   11.88
   3 -13   5   88.55   10.54
  -3 -13  -5   74.85   11.37
  -3 -13  -4   82.36    9.33
  -3 -13  -4   72.93   11.13
   3 -13   4   96.63    9.46
  -3 -13  -4   67.87    9.05
   3 -13   3  169.14   11.12
  -3 -13  -3  171.10    8.95
  -3 -13  -3  165.00   11.18
  -3 -13  -3  104.78    8.60
  -3 -13  -2  125.49    9.16
   3 -13   2   97.77    8.65
  -3 -13  -2  104.07   10.63
  -3 -13  -2  117.07    8.66
  -3 -13  -1   38.55    8.15
  -3 -13  -1   75.73   10.55
   3 -13   1   50.82   11.70
   3 -13   1   50.56    7.88
   3 -13   1   43.16   12.42
  -3 -13  -1   47.44   10.27
  -3 -13   0  130.76    7.83
  -3 -13   0  185.39   12.66
  -3 -13   0  131.22   13.45
   3 -13   0  159.83    7.90
   3 -13   0  155.36    7.24
   3 -13   0  131.07    8.52
   3 -13   0  149.66   13.64
   3 -12   6  136.97   10.54
  -3 -12  -6  102.47    9.61
  -3 -12  -6  144.10   10.35
  -3 -12  -6  124.37   13.02
  -3 -12  -5  108.68    9.28
  -3 -12  -5  123.00   10.09
  -3 -12  -5  122.55   11.20
   3 -12   5  134.59   10.72
  -3 -12  -4  165.86   13.09
  -3 -12  -4  201.24    9.97
  -3 -12  -4  174.98   11.14
   3 -12   4  214.29    9.95
  -3 -12  -3  152.57   10.93
  -3 -12  -3  197.95   10.85
   3 -12   3  197.93    8.99
  -3 -12  -3  166.74   10.20
  -3 -12  -2  228.42    9.95
   3 -12   2  234.62    8.51
  -3 -12  -2  188.40    9.50
  -3 -12  -2  202.34   11.54
  -3 -12  -1  244.24   12.08
   3 -12   1  235.41   14.67
  -3 -12  -1  256.52    9.49
   3 -12   1  212.56   15.24
   3 -12   1  324.52    8.66
  -3 -12   0  409.40   15.18
   3 -12   0  258.18    7.90
  -3 -12   0  337.36   17.29
  -3 -12   0  347.43    8.81
   3 -12   0  343.47   16.22
   3 -12   0  409.16   11.38
   3 -12   0  312.71   12.10
   3 -11   7   83.79   12.44
  -3 -11  -7   80.92   11.38
  -3 -11  -7   49.12   11.34
  -3 -11  -7   38.52    9.74
   3 -11   6  199.54   11.09
  -3 -11  -6  206.33   11.94
  -3 -11  -6  134.83   11.33
  -3 -11  -6  201.84   12.14
  -3 -11  -5  110.16    9.32
   3 -11   5  111.34   10.21
  -3 -11  -5   56.06   10.96
  -3 -11  -5   90.76   10.72
  -3 -11  -4  243.86    9.76
   3 -11   4  303.73   10.15
  -3 -11  -4  293.31   11.73
  -3 -11  -4  284.14   10.29
  -3 -11  -3  292.60    9.38
  -3 -11  -3  287.43    9.87
  -3 -11  -3  309.81   11.83
   3 -11   3  315.15    8.66
  -3 -11  -2  395.86    9.75
  -3 -11  -2  429.96   12.58
   3 -11   2  473.15    9.34
   3 -11   1  707.60   19.43
   3 -11   1  930.52   12.60
  -3 -11  -1  738.22   17.80
  -3 -11  -1  766.26   11.89
   3 -11   1  678.85   22.17
  -3 -11   0  613.06   14.64
  -3 -11   0  501.82   16.53
   3 -11   0  535.31   15.63
   3 -11   0  648.70   10.72
  -3 -11   0  519.45   10.21
   3 -11   0  499.69   11.88
  -3 -10  -7   85.92    9.23
  -3 -10  -7  147.40   10.82
   3 -10   7  108.97   13.07
  -3 -10  -7   98.62    9.34
   3 -10   6  109.27   12.62
  -3 -10  -6  101.86    9.39
  -3 -10  -6  146.73    9.62
  -3 -10  -6  109.56   11.00
  -3 -10  -5  334.47   10.89
   3 -10   5  328.13   10.35
  -3 -10  -5  261.96    9.82
  -3 -10  -5  342.27   11.75
  -3 -10  -4  292.39   13.49
  -3 -10  -4  319.98   11.17
  -3 -10  -4  337.81   10.82
   3 -10   4  319.05   12.26
  -3 -10  -3  506.51   11.02
  -3 -10  -3  443.15   10.21
   3 -10   3  484.97    9.17
  -3 -10  -3  464.33   12.33
  -3 -10  -2  763.69   11.82
  -3 -10  -2  858.10   17.20
   3 -10   2  919.53   11.82
   3 -10   1 1207.89   24.20
  -3 -10  -1 1359.37   14.88
   3 -10   1 1499.14   15.61
  -3 -10  -1 1214.32   19.25
   3 -10   1 1286.53   31.13
   3 -10   0  516.89   16.24
   3 -10   0  643.41   11.62
  -3 -10   0  526.05   11.94
   3 -10   0  533.69   12.01
  -3 -10   0  560.54   17.74
   3  -9   7  194.21   11.11
  -3  -9  -7  235.79   12.91
  -3  -9  -7  134.42    9.77
  -3  -9  -7  193.66   11.66
  -3  -9  -6  221.99   10.45
  -3  -9  -6  253.35   11.34
  -3  -9  -6  114.58   11.75
   3  -9   6  213.97   10.17
  -3  -9  -5  163.13   10.47
  -3  -9  -5  168.95   11.55
  -3  -9  -5   54.27    8.33
   3  -9   5  152.19   12.33
  -3  -9  -4  559.07   10.93
  -3  -9  -4  684.14   12.88
  -3  -9  -4  705.78   12.12
   3  -9   4  625.60   11.35
   3  -9   3  242.01    8.12
  -3  -9  -3  246.53    8.37
  -3  -9  -3  296.92    8.93
  -3  -9  -3  312.43   13.24
   3  -9   2  490.95    9.00
  -3  -9  -2  459.64   12.67
  -3  -9  -2  447.06   10.07
   3  -9   1  501.18    8.93
   3  -9   1  412.42   15.91
   3  -9   1  438.53   19.53
  -3  -9  -1  463.18   15.60
  -3  -9  -1  482.85   12.44
   3  -9   0  293.41    7.78
  -3  -9   0  274.53   14.04
  -3  -9   0  276.53    8.65
   3  -9   0  261.93    9.72
  -3  -8  -8  125.92   10.15
  -3  -8  -8  159.78   11.54
  -3  -8  -8  110.83   10.95
   3  -8   8  166.38   11.54
  -3  -8  -7  120.58    9.25
   3  -8   7  200.86   10.60
  -3  -8  -7  183.63   10.91
  -3  -8  -7  145.64   11.51
   3  -8   6  160.17    9.43
  -3  -8  -6  140.00   10.39
  -3  -8  -6  101.87    9.26
  -3  -8  -6   88.16    8.91
  -3  -8  -5  161.75    9.28
  -3  -8  -5  148.49   10.01
  -3  -8  -5  166.11    8.69
   3  -8   5  168.19    9.27
  -3  -8  -4  286.39   10.85
  -3  -8  -4  337.19    9.65
  -3  -8  -4  255.70    8.88
   3  -8   4  303.26    9.61
  -3  -8  -3  198.14    9.28
  -3  -8  -3  202.18   10.42
   3  -8   3  210.10    7.72
   3  -8   2  558.55    9.10
  -3  -8  -2  507.95   11.92
  -3  -8  -2  536.84   10.80
   3  -8   1  827.45   18.70
   3  -8   1 1122.52   12.46
  -3  -8  -1 1075.57   12.66
   3  -8   1 1018.15   27.08
  -3  -8  -1 1059.59   18.08
   3  -8   0   51.27    6.48
   3  -8   0   62.41    6.06
  -3  -8   0   64.21   11.22
  -3  -8   0   74.57    7.18
  -3  -7  -8   91.85   12.62
   3  -7   8   63.64   13.51
  -3  -7  -8   67.45    9.23
  -3  -7  -8   84.93   10.44
  -3  -7  -7  125.06    9.89
  -3  -7  -7  100.71    8.96
   3  -7   7  128.97    9.71
  -3  -7  -7  139.52    9.90
  -3  -7  -6   66.47    8.34
  -3  -7  -6   74.04    9.51
   3  -7   6   53.36    8.79
  -3  -7  -6   41.84    8.11
  -3  -7  -5  331.57   10.54
  -3  -7  -5  285.97   10.09
  -3  -7  -5  315.63   10.43
   3  -7   5  279.27   12.44
  -3  -7  -4  233.39    9.64
  -3  -7  -4  232.24   13.69
   3  -7   4  203.37    9.06
  -3  -7  -4  216.36    9.16
   3  -7   3  224.29   10.00
  -3  -7  -3  194.49    9.23
  -3  -7  -3  201.32    9.51
   3  -7   2  470.84    8.82
  -3  -7  -2  503.07   11.75
  -3  -7  -2  537.93   10.20
  -3  -7  -1  571.51   10.27
   3  -7   1  563.58    8.82
   3  -7   1  370.82   11.70
  -3  -7  -1  561.58   13.09
   3  -7   0  798.27   14.37
  -3  -7   0  833.69   18.28
  -3  -7   0  842.11   13.59
   3  -7   0  883.42   10.60
   3  -6   8   83.75   10.52
  -3  -6  -8   53.26    9.16
  -3  -6  -8   55.29    9.97
  -3  -6  -8   19.02   10.10
  -3  -6  -7  157.30   11.12
   3  -6   7  155.35   10.38
  -3  -6  -7  137.91    9.28
  -3  -6  -7   96.51    9.93
  -3  -6  -6  118.20    9.17
  -3  -6  -6  136.15    9.75
   3  -6   6  145.26    9.30
  -3  -6  -6  132.24    9.60
  -3  -6  -5  310.48   10.44
  -3  -6  -5  383.92   10.61
  -3  -6  -5  342.36   10.37
   3  -6   5  376.15   10.55
  -3  -6  -4  255.20   11.90
  -3  -6  -4  189.88    9.68
  -3  -6  -4  207.05   10.28
   3  -6   4  215.20   12.75
   3  -6   3  290.12    8.78
  -3  -6  -3  250.46    9.93
  -3  -6  -3  252.61    9.55
   3  -6   2  389.04    9.73
  -3  -6  -2  361.08   10.79
  -3  -6  -2  392.91    9.26
  -3  -6  -1 1789.91   23.15
   3  -6   1 1697.47   14.89
   3  -6   1 1465.42   22.00
  -3  -6  -1 1787.41   16.28
   3  -6   0 1831.11   15.67
  -3  -6   0 1840.90   24.03
  -3  -6   0 1978.09   17.17
   3  -6   0 1786.99   22.05
  -3  -5  -8  112.78   11.29
  -3  -5  -8  131.26   11.51
  -3  -5  -8  101.21   12.86
   3  -5   8  106.89   12.73
  -3  -5  -7   93.35   10.48
  -3  -5  -7   75.95    9.30
  -3  -5  -7   63.76   11.17
   3  -5   7   53.88    9.85
   3  -5   6   69.02    9.36
  -3  -5  -6   17.88    8.77
  -3  -5  -6   59.07    8.74
  -3  -5  -6   41.80   13.33
  -3  -5  -5  366.28   10.63
  -3  -5  -5  373.81    9.98
  -3  -5  -5  232.73    9.87
   3  -5   5  352.65   10.38
  -3  -5  -4 1044.09   14.34
  -3  -5  -4 1134.87   13.95
   3  -5   4 1024.53   13.16
  -3  -5  -4  970.14   13.37
  -3  -5  -3  542.68   11.62
   3  -5   3  541.34    9.54
  -3  -5  -3  547.21   10.45
  -3  -5  -2 1668.60   16.14
   3  -5   2 1660.93   14.66
   3  -5   2 1655.53   30.14
  -3  -5  -2 1440.17   17.79
   3  -5   1 1567.33   14.84
   3  -5   1 1075.95   17.12
  -3  -5  -1 1507.06   20.32
  -3  -5  -1 1023.03   12.79
   3  -5   0 2626.76   28.14
   3  -5   0 2484.96   19.10
  -3  -5   0 2563.21   27.71
  -3  -5   0 2637.53   21.13
   3  -4   8  127.98   10.73
  -3  -4  -8   82.33   10.82
  -3  -4  -8  123.27   10.25
  -3  -4  -8  136.20   10.71
  -3  -4  -7  127.38   10.07
  -3  -4  -7  128.80    9.16
  -3  -4  -7  136.12    9.51
   3  -4   7   81.59   10.26
  -3  -4  -6  214.62   10.07
  -3  -4  -6  348.28   10.77
  -3  -4  -6  343.17    9.85
   3  -4   6  339.74   10.50
  -3  -4  -5  878.38   13.25
  -3  -4  -5 1123.68   14.87
  -3  -4  -5 1189.15   14.79
   3  -4   5 1042.03   13.69
  -3  -4  -4  306.83    9.91
  -3  -4  -4  360.90    9.78
  -3  -4  -4  293.79   10.35
   3  -4   4  329.87    9.87
   3  -4   3 1021.73   11.98
  -3  -4  -3 1016.96   13.28
  -3  -4  -3  957.32   14.09
   3  -4   2  247.22   10.30
   3  -4   2  321.70   10.24
  -3  -4  -2  272.38   10.16
  -3  -4  -2  273.71    9.43
  -3  -4  -1  679.00   10.98
   3  -4   1  507.87    8.37
   3  -4   1  611.58   13.85
  -3  -4  -1  663.94   14.70
  -3  -4   0 4586.02   38.10
   3  -4   0 4237.42   28.98
  -3  -4   0 4055.99   27.48
   3  -4   0 3922.30   36.51
  -3  -3  -8   99.18   10.79
  -3  -3  -8  120.12   11.86
   3  -3   8  148.88   10.52
  -3  -3  -8  122.21   10.09
  -3  -3  -7  215.72   11.42
  -3  -3  -7  174.88    9.85
   3  -3   7  248.35   13.07
  -3  -3  -7  218.86   10.99
   3  -3   6  258.34   10.46
  -3  -3  -6  263.77   10.08
  -3  -3  -6  306.00   10.74
  -3  -3  -6  286.64    9.17
  -3  -3  -5  370.15    9.87
  -3  -3  -5  345.85   10.56
  -3  -3  -5  362.88   10.77
   3  -3   5  319.32   10.05
  -3  -3  -4  907.16   12.80
  -3  -3  -4  745.31   12.28
   3  -3   4  782.24   14.17
  -3  -3  -4  852.77   15.57
  -3  -3  -3  829.67   13.00
   3  -3   3  709.29   10.57
  -3  -3  -3  497.83   10.69
  -3  -3  -2 1621.16   16.55
   3  -3   2 1579.22   14.75
   3  -3   2 1617.00   22.78
  -3  -3  -2 1590.56   18.03
  -3  -3  -1 1547.68   16.03
   3  -3   1 1493.52   13.90
   3  -3   1 1448.88   19.40
  -3  -3  -1 1437.43   17.74
   3  -3   0 1602.64   20.42
   3  -3   0 1230.70   12.58
  -3  -3   0 1717.25   19.97
  -3  -3   0 1511.48   15.21
  -3  -2  -9   62.81   10.48
  -3  -2  -9   72.87   10.11
  -3  -2  -8  134.30   10.45
  -3  -2  -8  143.47   10.26
  -3  -2  -8  139.37   10.43
   3  -2   8  108.82    9.69
   3  -2   7  280.64   10.68
  -3  -2  -7  200.34   13.96
  -3  -2  -7  233.46   10.00
  -3  -2  -7  257.86   10.88
  -3  -2  -6  217.68    9.14
   3  -2   6  181.82   10.03
  -3  -2  -6  224.00    9.99
  -3  -2  -6  184.37    9.78
   3  -2   5  491.67   10.53
  -3  -2  -5  541.75   11.34
  -3  -2  -5  492.06   11.86
  -3  -2  -5  578.88   12.02
   3  -2   4  694.67   12.29
  -3  -2  -4  812.30   12.42
  -3  -2  -4  759.11   12.94
  -3  -2  -4  726.46   12.32
  -3  -2  -3  415.15   10.23
   3  -2   3  436.52    9.43
  -3  -2  -3  427.72   10.44
   3  -2   2  172.91    9.97
  -3  -2  -2  146.37   10.04
   3  -2   2  144.92    8.40
  -3  -2  -2  141.83    8.19
   3  -2   1 1554.95   18.55
  -3  -2  -1 1686.13   17.35
  -3  -2  -1 1796.66   19.40
   3  -2   1 1497.55   14.29
  -3  -2   0 3626.68   29.60
   3  -2   0 3425.83   30.26
  -3  -2   0 3627.15   27.74
   3  -2   0 3710.34   27.34
   3  -1   9   35.21    9.47
  -3  -1  -9   95.99   16.00
  -3  -1  -9   38.83   10.55
  -3  -1  -9   65.23   11.84
  -3  -1  -8   51.57   10.27
   3  -1   8   76.27    9.64
  -3  -1  -8   64.31   12.60
  -3  -1  -8   91.08   11.59
  -3  -1  -7  216.78   10.31
  -3  -1  -7  225.46   10.54
  -3  -1  -7  238.07   11.16
   3  -1   7  238.67   10.04
  -3  -1  -6  208.76    9.97
   3  -1   6  362.68   11.18
  -3  -1  -6  398.41   11.23
  -3  -1  -6  379.85   10.88
   3  -1   5   72.36    8.94
  -3  -1  -5   91.50    8.59
  -3  -1  -5   98.87    7.87
  -3  -1  -5  116.43    9.63
  -3  -1  -4  325.41    9.04
   3  -1   4  271.03   10.02
  -3  -1  -4  281.52   10.42
  -3  -1  -4  286.17   12.41
   3  -1   3 1025.98   12.97
  -3  -1  -3 1038.68   14.34
  -3  -1  -3 1070.02   13.92
  -3  -1  -2 1861.10   18.12
   3  -1   2 1859.17   17.93
  -3  -1  -2 1779.11   18.59
   3  -1   2 1802.40   20.37
   3  -1   1  995.52   12.31
  -3  -1  -1 1008.64   13.55
   3  -1   1  996.03   14.51
  -3  -1  -1 1030.06   13.90
  -3  -1   0 1630.85   16.90
   3  -1   0 1752.63   17.13
   3  -1   0 1485.01   16.49
  -3  -1   0 1802.11   18.65
  -3   0  -9   32.72   12.54
  -3   0  -9   43.08   10.34
  -3   0  -9   36.28   12.56
  -3   0  -8   92.03   11.77
  -3   0  -8   69.13   12.39
  -3   0  -8  121.42   12.30
  -3   0  -7  230.13   12.39
  -3   0  -7  262.51   10.84
  -3   0  -7  154.54   10.00
  -3   0  -6   13.94    8.74
  -3   0  -6   80.48   12.33
  -3   0  -6   48.75   10.97
  -3   0  -5  261.30   11.96
  -3   0  -5  286.66   12.16
  -3   0  -5  253.49    9.43
  -3   0  -4 1061.98   16.65
  -3   0  -4 1145.84   16.60
  -3   0  -4 1110.81   14.57
  -3   0  -3  742.23   12.03
  -3   0  -3  679.21   14.19
  -3   0  -2  301.94    8.91
  -3   0  -2  148.45    8.23
  -3   0  -1 3522.45   26.96
  -3   0  -1 3394.89   28.31
  -3   0   0 1240.04   14.71
  -3   0   0 1134.37   14.71
  -3   0   1 2940.91   25.96
  -3   0   1 2565.40   24.90
  -3   0   2 3281.57   29.57
  -3   0   3  135.29    7.04
  -3   0   3  166.44    8.97
  -3   0   4  686.16   10.24
  -3   0   4  670.07   11.10
  -3   0   5  420.03   11.75
  -3   0   5  389.53    8.82
  -3   0   6  591.22   10.47
  -3   0   6  627.07   13.50
  -3   0   7  213.69    8.28
  -3   0   7  225.33   11.67
  -3   0   8   70.47    9.87
  -3   0   8   33.36    8.50
  -3   0   9  243.72    9.88
  -3   0   9  242.26   10.53
  -3   0  10  151.03    9.31
  -3   0  10  149.74    9.15
  -3   0  11  211.90   11.16
  -3   0  11  185.38   10.54
  -3   1   1 2092.87   22.54
  -3   1   1 1914.91   19.33
   3   1  -1 2021.44   21.91
   3   1  -1 1963.50   19.34
   3   1  -2 2729.71   28.92
   3   1  -2 2747.81   24.44
  -3   1   2 2687.59   26.31
   3   1  -3 1475.42   16.12
   3   1  -3 1468.35   19.82
  -3   1   3 1529.60   18.76
  -3   1   3 1496.48   16.03
  -3   1   4  810.55   11.25
  -3   1   4  858.12   13.31
   3   1  -4  834.28   12.19
   3   1  -4  343.89    9.66
  -3   1   5 1014.37   12.85
   3   1  -5 1053.92   14.87
   3   1  -5  989.03   12.44
  -3   1   5  993.18   12.39
  -3   1   6  450.18    9.74
   3   1  -6  505.50   11.75
  -3   1   6  501.31   11.47
   3   1  -6  528.55   11.36
   3   1  -7  170.93    9.57
  -3   1   7  147.12    7.95
  -3   1   7  166.37    8.55
   3   1  -7  182.09    7.79
   3   1  -8  254.71    9.13
   3   1  -8  279.26   11.93
  -3   1   8  294.82   10.71
  -3   1   8  274.64   10.35
  -3   1   9  202.19    9.92
   3   1  -9  194.69    9.39
  -3   1   9  209.01    8.82
   3   1  -9  203.37   10.41
   3   1 -10  173.68   10.14
  -3   1  10  206.73   12.71
   3   1 -10  183.83   11.88
  -3   1  10  157.90    9.34
   3   1 -11   67.75    9.82
  -3   1  11   90.20   10.55
  -3   1  11   60.95   10.39
   3   1 -11   72.20   12.40
  -3   2   1 1381.02   14.78
   3   2  -1 1560.97   19.84
   3   2  -1 1371.09   14.96
  -3   2   1 1469.04   19.05
  -3   2   2  477.94    9.66
   3   2  -2  488.28    9.40
   3   2  -2  498.02   11.31
   3   2  -3 1978.94   19.70
  -3   2   3 1884.01   19.34
  -3   2   3 1916.91   18.74
  -3   2   4 1322.63   15.11
  -3   2   4 1296.26   14.41
   3   2  -4 1324.54   14.98
   3   2  -4 1363.85   18.69
   3   2  -5 1125.23   13.60
  -3   2   5 1054.32   12.56
  -3   2   5 1087.14   13.06
   3   2  -5 1086.22   16.16
  -3   2   6  825.42   11.60
  -3   2   6  772.15   11.10
   3   2  -6  777.17   13.54
   3   2  -6  871.41   12.46
  -3   2   7  407.88   10.32
  -3   2   7  379.26    9.02
   3   2  -7  408.50    9.67
   3   2  -7  434.12   11.23
   3   2  -8  243.24    9.31
  -3   2   8  260.16   10.00
   3   2  -8  233.05   11.92
  -3   2   8  208.43    8.69
  -3   2   9  256.90    9.23
  -3   2   9  291.06    9.96
   3   2  -9  257.16   13.13
   3   2  -9  262.53    9.84
   3   2 -10  166.44   13.89
  -3   2  10  197.02    9.93
  -3   2  10  149.49   11.23
   3   2 -10  171.19   12.91
  -3   2  11  112.73   10.21
   3   2 -11   96.39   11.18
   3   2 -11  144.33   12.17
  -3   2  11  142.22    9.44
  -3   3   1  293.68    8.57
   3   3  -1  311.84   11.39
  -3   3   1  282.22    7.98
   3   3  -1  274.95    7.82
   3   3  -2  930.01   18.75
   3   3  -2 1055.66   19.12
  -3   3   2  964.11   13.40
   3   3  -2  974.24   12.40
   3   3  -3 2069.87   19.93
   3   3  -3 2051.87   29.11
  -3   3   3 2027.15   19.29
  -3   3   3 1590.64   16.39
  -3   3   4 2049.79   17.97
   3   3  -4 2166.04   22.22
  -3   3   4 2019.83   18.17
  -3   3   5 1035.83   13.54
   3   3  -5 1020.51   13.46
  -3   3   5  987.72   12.00
   3   3  -5 1000.79   16.28
  -3   3   6  461.70    9.03
   3   3  -6  526.20   10.15
   3   3  -6  490.71   12.16
  -3   3   6  533.21    9.42
  -3   3   7  813.18   11.83
   3   3  -7  913.24   16.59
   3   3  -7  859.53   13.53
  -3   3   7  992.76   13.21
   3   3  -8  645.22   13.21
  -3   3   8  708.93   11.93
  -3   3   8  609.64   11.05
   3   3  -8  727.36   15.08
   3   3  -9  170.52    9.75
  -3   3   9  182.80    9.05
  -3   3   9  187.31    9.59
   3   3  -9  184.12   10.83
  -3   3  10  190.19    9.33
   3   3 -10  203.06   12.81
  -3   3  10  178.45   11.14
   3   3 -10  203.44   11.28
   3   3 -11   69.46   11.41
   3   3 -11   53.79    9.60
  -3   3  11   79.71    9.82
  -3   3  11   55.09   10.58
  -3   4   1 1821.56   16.18
  -3   4   1 2012.84   23.57
   3   4  -1 1934.68   33.99
   3   4  -1 1770.84   16.10
  -3   4   2 3862.97   34.10
   3   4  -2 4026.61   49.42
   3   4  -2 3764.31   28.61
   3   4  -2 3596.91   55.18
  -3   4   3 1365.09   14.89
   3   4  -3 1326.49   14.86
   3   4  -3 1433.03   27.55
  -3   4   4  864.74   11.27
   3   4  -4  869.97   12.45
   3   4  -4  846.31   17.53
  -3   4   4  786.26   10.86
   3   4  -5 1525.65   17.67
  -3   4   5 1541.82   14.61
  -3   4   5 1427.94   14.08
  -3   4   6  690.74   12.16
   3   4  -6  719.53   11.92
  -3   4   6  769.76   13.54
   3   4  -6  684.51   13.87
   3   4  -7  260.21    8.83
  -3   4   7  313.86    9.46
   3   4  -7  290.04   11.65
  -3   4   7  248.93    8.71
   3   4  -8  212.34   10.34
   3   4  -8  226.81   10.43
  -3   4   8  214.40    8.99
  -3   4   8  201.41    9.46
  -3   4   9  168.06    9.85
   3   4  -9  157.48   10.36
  -3   4   9  135.14    8.40
   3   4  -9  184.59   10.58
  -3   4  10  158.09   11.11
   3   4 -10  137.03   11.81
  -3   4  10  166.25    8.95
   3   4 -10  182.74   11.21
  -3   4  11  100.97    9.00
   3   4 -11  140.62   16.57
   3   4 -11  137.82   13.52
  -3   4  11  143.29   12.61
  -3   5   1 1038.62   15.52
   3   5  -1 1070.66   29.14
   3   5  -1  936.32   11.78
  -3   5   1  968.05   10.92
   3   5  -2  668.02   10.36
  -3   5   2  748.92   13.77
  -3   5   3 1970.94   19.07
   3   5  -3 1989.60   38.37
   3   5  -3 2003.68   20.01
  -3   5   4  357.15   10.25
   3   5  -4  348.60    8.59
   3   5  -4  326.23   15.98
  -3   5   4  309.71    8.62
  -3   5   5  534.12    9.34
   3   5  -5  565.34   10.57
  -3   5   5  478.87    9.05
   3   5  -6  146.46    9.84
   3   5  -6  121.06   10.16
  -3   5   6  133.93    8.27
  -3   5   6  105.95    7.90
  -3   5   7  525.50   10.06
   3   5  -7  601.34   13.11
  -3   5   7  476.96    9.85
   3   5  -7  588.62   14.28
  -3   5   8  582.91   13.60
  -3   5   8  466.00   10.09
   3   5  -8  578.66   13.69
   3   5  -8  564.65   13.42
   3   5  -9  122.07   12.74
  -3   5   9  118.31    8.11
   3   5  -9  155.34   12.43
  -3   5   9  173.38   10.74
  -3   5  10  172.58   10.21
   3   5 -10  161.82   18.23
   3   5 -10  120.21   11.22
  -3   5  10  114.75    8.33
   3   5 -11   39.60   11.15
   3   5 -11   36.84   14.26
  -3   5  11   87.58   13.18
   3   6  -1 1137.67   29.93
  -3   6   1 1343.80   13.25
   3   6  -1 1329.49   13.86
  -3   6   2 1554.32   18.59
   3   6  -2 1440.17   14.93
   3   6  -3 1064.65   13.57
  -3   6   3 1123.03   14.28
  -3   6   4  170.39    9.42
   3   6  -4  174.50   10.35
   3   6  -4  149.61    7.72
  -3   6   4  202.33    7.27
   3   6  -5  190.02    7.70
   3   6  -5  185.03   10.25
  -3   6   5  218.48    9.36
  -3   6   5  169.44    7.48
  -3   6   6  252.16    8.79
  -3   6   6  200.24    8.21
   3   6  -6  236.40    8.54
  -3   6   7  391.73   10.51
   3   6  -7  468.16   12.26
  -3   6   7  398.03    9.41
   3   6  -7  461.06   13.15
  -3   6   8  101.87   10.05
   3   6  -8  116.49   11.47
   3   6  -8  114.07   10.71
  -3   6   8  102.36    7.94
  -3   6   9  171.44   10.15
   3   6  -9  163.90   14.70
  -3   6   9  133.31    8.40
   3   6  -9  181.58   11.42
   3   6 -10  206.44   19.10
   3   6 -10  196.62   11.86
  -3   6  10  183.94   11.17
  -3   6  10  147.48    9.27
  -3   6  11  208.85   11.49
   3   6 -11  177.27   12.88
   3   7  -1  445.03    9.43
  -3   7   2  924.45   14.30
   3   7  -2  992.59   13.87
  -3   7   3  680.01   12.74
   3   7  -3  668.32   11.26
  -3   7   4  313.94    7.60
   3   7  -4  322.65   12.74
   3   7  -4  316.97    8.67
  -3   7   4  305.51    8.57
  -3   7   5  292.07    8.63
   3   7  -5  260.47    8.46
   3   7  -5  297.81   10.88
  -3   7   5  246.53    8.40
   3   7  -6  890.01   17.07
  -3   7   6  932.33   13.89
  -3   7   6  726.29   10.89
   3   7  -6  860.44   14.32
  -3   7   7   82.01    8.99
   3   7  -7   90.78    9.75
  -3   7   7   85.36    8.11
   3   7  -8  451.49   16.37
  -3   7   8  304.51    9.07
   3   7  -8  427.48   13.27
  -3   7   8  424.60   11.44
   3   7  -9  138.61   13.75
  -3   7   9  124.14    9.14
   3   7  -9  187.48   11.87
  -3   7   9  190.79   13.01
  -3   7  10  127.43   11.10
   3   7 -10  120.33   19.35
   3   7 -10  141.14   12.66
   3   8  -1  275.39    8.86
   3   8  -2  700.60   11.36
  -3   8   2  679.70   12.48
  -3   8   3  490.66   10.42
   3   8  -3  504.62   10.22
   3   8  -4  247.61    8.42
   3   8  -4  293.70   12.48
  -3   8   4  257.67    8.53
  -3   8   5  967.54   13.22
  -3   8   5 1017.31   12.61
   3   8  -5 1079.75   19.35
   3   8  -5  926.30   13.58
   3   8  -6  460.91   12.83
   3   8  -6  519.94   13.34
  -3   8   6  420.62    9.77
  -3   8   6  526.81    9.96
   3   8  -7  593.09   15.75
  -3   8   7  382.31   10.05
  -3   8   7  522.71   10.85
   3   8  -8  171.17   11.55
  -3   8   8  200.00   10.07
   3   8  -8  148.58   11.09
  -3   8   8  139.97   10.21
  -3   8   9  252.45   13.29
   3   8  -9  250.24   13.67
   3   8  -9  264.84   15.63
  -3   8   9  206.00    9.45
  -3   8  10  111.61   11.80
   3   8 -10  100.54   16.15
   3   8 -10   54.87   16.02
   3   9  -1  981.27   12.97
   3   9  -2  879.51   12.62
  -3   9   2  893.74   14.64
  -3   9   3  816.95   13.37
   3   9  -3  920.23   13.26
   3   9  -4  647.21   20.14
  -3   9   4  597.94   11.52
   3   9  -4  669.11   11.95
   3   9  -5  694.99   12.85
   3   9  -5  670.48   13.74
  -3   9   5  523.08   10.75
  -3   9   5  745.37   13.64
  -3   9   6  850.56   14.24
   3   9  -6  879.64   16.57
   3   9  -6  950.49   18.08
  -3   9   6  956.36   12.51
  -3   9   7  113.04   10.70
  -3   9   7   64.13   10.17
   3   9  -7  105.01   10.10
   3   9  -7   90.02    9.96
  -3   9   8   65.33    8.42
  -3   9   8   83.83   12.67
   3   9  -8   90.46   11.60
  -3   9   9  230.67   11.03
   3   9  -9  203.73   14.56
   3   9  -9  180.69   14.01
  -3   9  10  113.00   13.62
   3   9 -10  109.36   14.64
   3   9 -10   59.91   14.23
   3  10  -1  704.82   11.58
  -3  10   2  589.28   12.36
   3  10  -2  598.11   11.30
  -3  10   3  372.75   10.06
   3  10  -3  400.18    9.94
   3  10  -4 1038.09   15.08
  -3  10   4  957.02   14.30
   3  10  -5  323.28   11.89
  -3  10   5  326.96   10.24
   3  10  -5  362.62   14.42
  -3  10   6  479.83   11.89
  -3  10   6  410.73   10.62
   3  10  -6  461.78   11.92
   3  10  -6  467.68   11.80
  -3  10   7   77.99    8.02
  -3  10   7   54.43    8.07
   3  10  -7   81.83   12.03
   3  10  -7   79.32   10.15
   3  10  -8  461.36   17.04
   3  10  -8  321.74   14.45
  -3  10   8  408.41   11.86
   3  10  -9  174.39   14.59
  -3  10   9  197.67   11.82
   3  11  -1  843.43   13.18
   3  11  -2 1316.67   15.92
  -3  11   3  580.81   12.92
   3  11  -3  617.44   14.47
  -3  11   4  224.16    9.34
   3  11  -4  246.16   11.26
  -3  11   5  212.68    9.68
   3  11  -5  248.06   12.91
   3  11  -5  244.35   10.73
  -3  11   6   88.57    8.03
   3  11  -6   69.96    9.38
   3  11  -6   65.99   10.06
   3  11  -7  211.63   10.75
  -3  11   7  222.11    9.26
   3  11  -7  229.52   13.01
   3  11  -8   59.33   13.13
  -3  11   8   65.60   10.21
   3  11  -8   62.53   12.08
  -3  11   9  172.69   11.28
   3  11  -9  159.10   14.22
   3  11  -9  115.00   16.41
   3  12  -1  703.96   14.76
   3  12  -2  350.07   11.13
   3  12  -3  176.72   10.82
   3  12  -4  288.90   11.84
   3  12  -5  286.17   13.02
   3  12  -6  183.71   16.75
   3  12  -6  138.55    9.25
   3  12  -7  143.40   10.74
  -3  12   7  164.19   10.51
   3  12  -7  179.92   16.27
   3  12  -8   99.78   15.84
   3  12  -8  100.86   10.69
  -3  12   8  143.73    9.74
  -3  12   9  227.93   13.80
   3  12  -9  176.13   15.68
   3  13  -1  201.05    9.34
   3  13  -2  519.57   12.12
   3  13  -3  193.59   13.53
   3  13  -4  206.36   11.96
   3  13  -5   99.32   11.59
   3  13  -6  245.47   13.93
   3  13  -6  269.44   15.18
   3  13  -7   60.73   10.87
   3  13  -7   65.78   16.94
   3  13  -8  196.31   14.24
   3  13  -8  147.29   18.70
  -3  13   8  199.44   10.91
   3  14  -1  138.73    9.37
   3  14  -2  193.32   10.18
   3  14  -3  247.35   11.51
   3  14  -4  172.81   14.76
   3  14  -5  243.55   14.98
   3  14  -6  112.25   16.46
   3  14  -7  268.15   21.55
   3  14  -7  168.57   13.15
   3  14  -8   20.33    8.04
   3  14  -8   28.30   15.71
   3  15  -2  286.83   11.46
   3  15  -3  240.08   12.27
   3  15  -4  133.84   12.59
   3  15  -5  192.30   13.85
   3  15  -6  138.86   14.43
   3  16  -5   90.07   12.65
   2 -18   2   39.64    8.94
  -2 -18  -2  124.32   15.41
  -2 -18  -2  196.24   16.24
   2 -18   2  196.93   12.12
  -2 -18  -2  141.32   12.20
  -2 -18  -2   88.10   13.37
   2 -18   1   21.64    8.40
   2 -18   1    3.90   10.77
  -2 -18  -1   13.37   11.53
  -2 -18  -1   40.43   11.38
   2 -18   1   14.16   10.39
  -2 -18  -1   18.13   11.77
  -2 -18  -1   13.92   12.65
   2 -18   0  182.16   13.05
   2 -18   0  111.84    9.00
   2 -18   0   93.91   11.26
  -2 -18   0  111.91   12.16
  -2 -18   0   73.49   18.01
   2 -18   0  107.11   13.55
  -2 -18   0   81.32   10.60
  -2 -17  -3  133.79   10.75
  -2 -17  -3  255.02   14.57
   2 -17   3   58.84    8.67
  -2 -17  -3  176.36   11.06
  -2 -17  -3  210.24   13.27
   2 -17   3  233.43   14.26
  -2 -17  -2    4.35   11.78
   2 -17   2   16.74    7.56
  -2 -17  -2   39.96   12.40
  -2 -17  -2   43.25   10.92
   2 -17   2   32.98    9.70
  -2 -17  -2   30.51   13.66
  -2 -17  -1  282.38   14.62
   2 -17   1  239.21   15.74
  -2 -17  -1  433.50   16.93
   2 -17   1  384.37   13.17
   2 -17   1  253.34   16.15
  -2 -17  -1  223.72   13.23
  -2 -17  -1  313.95   17.17
   2 -17   1  334.19   10.71
  -2 -17   0   65.83   15.92
  -2 -17   0   66.56   12.88
   2 -17   0   43.08    8.62
   2 -17   0   39.40   10.96
  -2 -17   0   35.72    9.43
  -2 -17   0   51.09   14.36
   2 -17   0   45.57   12.69
   2 -17   0   60.74   12.18
  -2 -16  -4  183.11   15.47
  -2 -16  -4  155.88   11.04
  -2 -16  -4  158.32   10.74
   2 -16   4  187.27   11.72
  -2 -16  -3   65.82   14.10
  -2 -16  -3   50.60    9.39
   2 -16   3   42.67   10.14
  -2 -16  -3   54.97   12.02
  -2 -16  -3   31.72    9.41
  -2 -16  -2  282.48   14.19
  -2 -16  -2  388.58   14.10
   2 -16   2  409.12   13.37
  -2 -16  -2  466.88   15.17
   2 -16   2   65.28    7.95
  -2 -16  -2  302.61   16.47
  -2 -16  -1   90.91   10.28
  -2 -16  -1  100.34   12.99
   2 -16   1   57.22   10.98
   2 -16   1   61.69   11.66
   2 -16   1   67.09    8.18
  -2 -16  -1   87.49   11.68
   2 -16   1   92.62    9.53
  -2 -16  -1   83.04   11.59
   2 -16   0  270.75    9.51
   2 -16   0  615.35   18.47
   2 -16   0  550.81   15.52
  -2 -16   0  782.41   20.36
   2 -16   0  773.68   14.34
  -2 -16   0  547.53   13.20
  -2 -16   0  550.46   14.22
  -2 -16   0  503.24   18.27
  -2 -15  -5  131.90    9.64
  -2 -15  -5  145.48   10.31
  -2 -15  -5  168.81   15.14
   2 -15   5  163.11   12.01
  -2 -15  -4   62.93    9.48
  -2 -15  -4  101.88   12.13
   2 -15   4  117.89   10.07
  -2 -15  -4   81.54   11.47
   2 -15   3  410.62   11.43
  -2 -15  -3  329.73   10.57
  -2 -15  -3  435.97   16.70
  -2 -15  -3  294.31   11.04
  -2 -15  -2   35.53    9.35
  -2 -15  -2   23.53    9.71
  -2 -15  -2   15.41    9.27
   2 -15   2   33.67    8.07
   2 -15   2   18.75    6.87
  -2 -15  -2   37.85   11.63
  -2 -15  -1  447.96   16.51
  -2 -15  -1  242.81   10.41
   2 -15   1  281.23   14.84
   2 -15   1  266.66   13.72
   2 -15   1  307.32    9.08
  -2 -15  -1  328.02   11.64
  -2 -15  -1  336.23   14.01
   2 -15   1  414.87   11.20
   2 -15   0  126.55    8.39
  -2 -15   0  121.15   12.24
  -2 -15   0  146.24   14.39
   2 -15   0  141.25   11.61
  -2 -15   0  125.32    8.69
  -2 -15   0  168.37   11.63
   2 -15   0  164.29    9.39
   2 -15   0  132.81   13.50
  -2 -14  -6  105.87   10.41
  -2 -14  -6   76.33    9.79
  -2 -14  -6  152.85   11.96
   2 -14   6  132.49   11.82
  -2 -14  -5   92.77   11.83
   2 -14   5   63.90   10.30
  -2 -14  -5   98.85   11.58
  -2 -14  -5   30.49    9.72
  -2 -14  -4  177.57   11.88
   2 -14   4  205.19   10.12
  -2 -14  -4  164.92   12.35
  -2 -14  -4  197.25   10.15
  -2 -14  -3   75.80    8.90
   2 -14   3   73.82    8.94
  -2 -14  -3   93.83   11.16
  -2 -14  -3   70.19    8.88
  -2 -14  -2  197.14   13.01
  -2 -14  -2  130.05    9.37
  -2 -14  -2  161.07   13.81
   2 -14   2  191.58    9.33
  -2 -14  -2  153.60    9.57
   2 -14   1  153.49   10.04
   2 -14   1  145.24   12.04
  -2 -14  -1  229.79   11.60
   2 -14   1  175.02   12.23
  -2 -14  -1  185.87   10.38
  -2 -14  -1  177.75   15.30
   2 -14   1  212.71    8.78
  -2 -14  -1  193.21    9.53
  -2 -14   0  322.66   15.09
   2 -14   0  359.33    9.72
   2 -14   0  317.69   10.86
  -2 -14   0  405.04   14.56
   2 -14   0  323.53   11.32
  -2 -14   0  280.80   11.21
  -2 -14   0  314.82   10.72
   2 -14   0  314.28   13.89
  -2 -13  -6  113.48    9.87
  -2 -13  -6   86.59   12.30
   2 -13   6  115.05   11.70
  -2 -13  -6   96.42    9.63
  -2 -13  -5  302.61   12.59
   2 -13   5  318.28   13.84
  -2 -13  -5  261.55   10.44
  -2 -13  -5  253.75   10.44
  -2 -13  -4  200.28   13.31
  -2 -13  -4  159.15   10.93
   2 -13   4  191.14    9.63
  -2 -13  -4  193.72    9.81
   2 -13   3  203.53   10.77
  -2 -13  -3  189.65   12.83
  -2 -13  -3  202.39   11.46
  -2 -13  -3  154.38    9.78
  -2 -13  -2  180.89    9.68
  -2 -13  -2  244.99   10.02
  -2 -13  -2  238.78   11.72
   2 -13   2  261.50    8.75
  -2 -13  -1  135.95    8.48
  -2 -13  -1  184.47    9.18
   2 -13   1  153.87   11.71
  -2 -13  -1  148.37   11.17
  -2 -13  -1  183.95   11.81
   2 -13   1  168.70    8.71
   2 -13   1   18.03    6.85
   2 -13   1  164.30   13.49
  -2 -13   0   48.90   12.78
   2 -13   0   27.41    7.09
   2 -13   0   26.83    9.95
   2 -13   0   49.52    9.42
  -2 -13   0   42.01    9.17
  -2 -13   0   39.38    8.61
   2 -13   0   24.46   11.24
  -2 -13   0   45.40    7.11
   2 -12   7   70.41   11.69
  -2 -12  -7   51.31    9.84
  -2 -12  -7   27.62   11.76
  -2 -12  -7   47.53    9.27
  -2 -12  -6  163.54   10.34
   2 -12   6  175.06   11.29
  -2 -12  -6  140.27    9.90
  -2 -12  -6  163.79   11.59
   2 -12   5   63.27   11.99
  -2 -12  -5   70.81   10.68
  -2 -12  -5   52.11    9.28
  -2 -12  -5   34.62    9.13
  -2 -12  -4  449.56   14.71
  -2 -12  -4  417.34   10.80
   2 -12   4  410.62   12.04
  -2 -12  -4  368.01   10.31
  -2 -12  -3  200.40    9.39
  -2 -12  -3  173.30   11.16
   2 -12   3  189.04    8.38
  -2 -12  -3  203.44   10.16
  -2 -12  -2  303.14   11.56
   2 -12   2  319.30   10.95
  -2 -12  -2  310.03   10.38
  -2 -12  -2  279.99    9.85
  -2 -12  -1  404.79   11.04
  -2 -12  -1  403.10   10.44
   2 -12   1  454.66    9.95
   2 -12   1  352.76   14.48
  -2 -12  -1  355.65   12.56
   2 -12   1  340.96   13.23
  -2 -12  -1  349.44    9.71
  -2 -12   0  580.13   16.59
   2 -12   0  588.60   13.52
   2 -12   0  569.51   10.16
  -2 -12   0  625.17   14.19
   2 -12   0  560.13   10.59
   2 -12   0  549.83   16.17
  -2 -12   0  519.06   10.93
   2 -11   7  141.01   11.35
  -2 -11  -7   75.05    9.48
  -2 -11  -7  102.52   11.18
  -2 -11  -7   53.17    9.96
  -2 -11  -6   36.19    9.22
  -2 -11  -6   26.40   10.16
   2 -11   6   15.32    9.95
  -2 -11  -6   12.48   11.77
   2 -11   5  533.50   14.95
  -2 -11  -5  560.01   13.30
  -2 -11  -5  498.23   11.73
  -2 -11  -5  385.59   12.34
   2 -11   4   40.27    8.34
  -2 -11  -4   50.31    8.97
  -2 -11  -4   34.06    8.56
  -2 -11  -4   59.04   13.20
   2 -11   3  386.01    9.43
  -2 -11  -3  381.34   13.32
  -2 -11  -3  386.24   12.20
  -2 -11  -3  351.89    9.72
  -2 -11  -2  736.72   12.22
  -2 -11  -2  749.18   14.64
   2 -11   2  724.74   11.31
  -2 -11  -2  630.55   11.44
  -2 -11  -1 1484.40   17.44
   2 -11   1 1593.89   17.02
   2 -11   1 1542.11   25.95
   2 -11   1 1377.70   21.75
  -2 -11  -1 1579.50   21.96
  -2 -11   0  355.35   10.71
  -2 -11   0  374.82   10.75
   2 -11   0  362.79   11.21
   2 -11   0  346.55   12.22
   2 -11   0  270.66    7.60
  -2 -11   0  358.05   12.48
   2 -11   0  390.52    8.58
  -2 -10  -8  111.96    9.78
   2 -10   8  170.60   11.98
  -2 -10  -8  103.17   10.83
  -2 -10  -8   46.43    9.50
  -2 -10  -7   34.89    9.30
  -2 -10  -7   44.56    9.31
   2 -10   7   65.12   10.94
  -2 -10  -7   53.81   12.49
  -2 -10  -6  277.85   12.87
  -2 -10  -6  250.05    9.99
  -2 -10  -6  284.17   11.56
   2 -10   6  328.29   11.40
   2 -10   5  121.33    9.20
  -2 -10  -5   68.84    9.13
  -2 -10  -5  135.05    9.93
  -2 -10  -5  126.10    9.97
  -2 -10  -4  974.16   13.41
  -2 -10  -4  724.45   12.11
  -2 -10  -4  936.41   14.80
   2 -10   4  875.30   12.20
  -2 -10  -3   15.56    8.18
  -2 -10  -3   53.24    8.53
   2 -10   3   51.92    7.77
  -2 -10  -3   33.66   10.22
  -2 -10  -2 1829.26   18.24
   2 -10   2 1850.87   16.30
  -2 -10  -2 1823.60   21.63
  -2 -10  -2 1633.89   16.40
  -2 -10  -1  274.59    8.68
   2 -10   1  265.87   10.60
   2 -10   1  339.29   10.56
   2 -10   1  279.75   13.86
  -2 -10  -1  307.46   11.91
   2 -10   0  958.76   18.46
  -2 -10   0  896.65   12.47
   2 -10   0 1006.38   16.92
  -2 -10   0  979.02   17.04
  -2 -10   0  984.13   19.19
   2 -10   0  924.40   12.31
  -2  -9  -8   64.74    9.35
   2  -9   8   64.21   13.14
  -2  -9  -8   72.16    9.76
  -2  -9  -8   78.70   10.16
  -2  -9  -7  185.09   12.08
  -2  -9  -7  253.36   10.59
   2  -9   7  305.80   14.82
  -2  -9  -7  276.84   11.38
  -2  -9  -6   52.47    9.72
   2  -9   6   58.75   13.75
  -2  -9  -6   35.38    9.40
  -2  -9  -6   36.90    8.71
  -2  -9  -5  364.38   10.21
  -2  -9  -5  451.44   11.03
  -2  -9  -5  466.35   11.33
   2  -9   5  448.04   10.58
  -2  -9  -4  206.72   11.00
   2  -9   4  200.65    9.25
  -2  -9  -4  142.44    8.24
  -2  -9  -4  192.82   10.08
   2  -9   3  628.77   10.52
  -2  -9  -3  782.05   12.17
  -2  -9  -3  705.52   13.01
  -2  -9  -3  742.25   16.36
   2  -9   2  320.19    8.42
  -2  -9  -2  320.69   11.14
  -2  -9  -2  328.54    9.47
  -2  -9  -1 1396.89   15.27
   2  -9   1 1490.82   15.26
   2  -9   1 1360.77   23.18
  -2  -9  -1 1431.36   19.81
   2  -9   1 1225.40   23.06
  -2  -9   0   83.02    9.16
  -2  -9   0   92.84    8.82
   2  -9   0   90.87    7.41
   2  -9   0   86.42    6.39
   2  -9   0   69.77   10.06
  -2  -9   0   82.12    7.63
   2  -8   8  198.49   11.38
  -2  -8  -8  171.97   11.17
  -2  -8  -8  171.67   10.62
  -2  -8  -8  198.66   11.03
  -2  -8  -7  120.55   11.20
  -2  -8  -7  129.04   10.00
   2  -8   7  132.58   10.76
  -2  -8  -7  110.17    9.12
  -2  -8  -6  123.76    8.73
  -2  -8  -6  171.24    9.14
   2  -8   6  175.28   10.56
  -2  -8  -6  167.69   10.53
  -2  -8  -5  322.65    9.98
  -2  -8  -5  446.86   10.94
   2  -8   5  403.59   13.08
  -2  -8  -5  380.87   10.76
  -2  -8  -4  698.90   13.55
  -2  -8  -4  683.09   10.77
   2  -8   4  672.42   11.50
  -2  -8  -4  836.29   12.22
   2  -8   3  263.12    8.41
  -2  -8  -3  299.76   12.56
  -2  -8  -3  288.26   10.26
  -2  -8  -3  238.79    9.38
  -2  -8  -2  831.91   13.63
   2  -8   2  716.58   10.40
  -2  -8  -2  801.92   16.29
  -2  -8  -1   93.02    7.68
   2  -8   1   74.30    8.69
   2  -8   1   87.43    8.27
  -2  -8  -1   76.92    9.49
   2  -8   1   82.31    9.79
   2  -8   0  208.45    9.26
   2  -8   0  216.57    8.57
  -2  -8   0  211.06   12.79
   2  -8   0  199.87   10.26
  -2  -8   0  215.61   10.60
  -2  -7  -8   87.34    9.53
  -2  -7  -8  121.27    8.98
  -2  -7  -8  147.42    9.75
   2  -7   8  126.38   10.42
  -2  -7  -7  275.26   10.30
   2  -7   7  313.30   12.69
  -2  -7  -7  231.07    9.52
  -2  -7  -7  224.20    9.55
  -2  -7  -6   87.86    9.06
   2  -7   6  108.88   13.44
  -2  -7  -6  119.29    9.50
  -2  -7  -6  116.00    9.13
   2  -7   5  441.67   10.48
  -2  -7  -5  578.71   13.20
  -2  -7  -5  500.31   11.39
  -2  -7  -5  451.49   10.67
  -2  -7  -4  500.34   12.22
   2  -7   4  525.64   10.73
  -2  -7  -4  520.45   13.93
  -2  -7  -4  624.35   11.41
  -2  -7  -3  443.57   11.52
  -2  -7  -3  555.54   10.58
   2  -7   3  444.20    9.56
  -2  -7  -3  489.42   11.64
  -2  -7  -2  472.86   10.02
  -2  -7  -2  419.72   11.87
   2  -7   2  527.29    8.98
   2  -7   1  452.49   18.27
   2  -7   1  384.77   13.26
  -2  -7  -1  444.31   12.77
   2  -7   1  450.64    8.65
  -2  -7  -1  339.01    9.24
   2  -7   0  682.34    9.67
   2  -7   0  694.43   14.11
  -2  -7   0  645.20   16.54
  -2  -7   0  707.33   12.42
  -2  -6  -9   21.38    8.95
  -2  -6  -9   43.99    8.89
   2  -6   9   17.73   10.58
  -2  -6  -9   43.36    9.80
  -2  -6  -8  145.92   10.64
   2  -6   8  185.89   10.49
  -2  -6  -8  192.47   10.57
  -2  -6  -8  180.02   10.18
  -2  -6  -7   39.66    9.01
   2  -6   7   56.20   10.05
  -2  -6  -7   30.46    8.29
  -2  -6  -7   47.34    8.56
  -2  -6  -6  436.93   10.98
  -2  -6  -6  482.03   11.46
   2  -6   6  469.46   11.70
  -2  -6  -6  380.43   11.19
  -2  -6  -5  207.44   11.26
   2  -6   5  214.12    9.44
  -2  -6  -5  182.24    9.01
  -2  -6  -5  205.89   11.89
  -2  -6  -4  340.97   12.24
   2  -6   4  296.12    9.76
  -2  -6  -4  270.59    9.96
  -2  -6  -4  289.48    9.21
  -2  -6  -3  645.30   10.99
  -2  -6  -3  533.26   10.17
   2  -6   3  631.55   11.99
  -2  -6  -3  531.08   11.86
  -2  -6  -2 2023.75   18.00
   2  -6   2 2179.57   17.79
  -2  -6  -2 2016.59   22.27
   2  -6   1 1511.03   28.57
   2  -6   1 1733.40   15.80
  -2  -6  -1 1582.49   21.78
  -2  -6  -1 1732.64   16.77
   2  -6   0 1581.08   21.98
  -2  -6   0 1440.38   25.03
  -2  -6   0 1648.77   17.47
   2  -6   0 1441.61   14.72
  -2  -5  -9   82.38    9.36
  -2  -5  -9   69.88    9.83
   2  -5   9   81.39   10.76
  -2  -5  -9   67.67   10.51
  -2  -5  -8   38.06   10.72
  -2  -5  -8   55.21    9.84
   2  -5   8   72.94    9.36
  -2  -5  -8   56.23    9.80
  -2  -5  -7  213.92   10.01
  -2  -5  -7  222.43    9.36
  -2  -5  -7  236.54    9.46
   2  -5   7  213.70   10.13
  -2  -5  -6  291.43   10.38
   2  -5   6  289.07   10.98
  -2  -5  -6  263.84    9.95
  -2  -5  -6  101.97    9.34
  -2  -5  -5 1149.25   15.75
  -2  -5  -5 1407.75   17.31
   2  -5   5 1132.96   14.53
  -2  -5  -5 1214.20   16.84
  -2  -5  -4  321.40    8.91
  -2  -5  -4  368.62   11.39
  -2  -5  -4  306.59   10.23
   2  -5   4  348.93    9.61
  -2  -5  -3 1752.94   17.16
  -2  -5  -3 1403.76   14.98
   2  -5   3 1323.67   14.00
  -2  -5  -3 1286.57   16.30
   2  -5   2  522.19    9.12
  -2  -5  -2  416.49   11.63
  -2  -5  -2  510.14   12.25
  -2  -5  -1 2548.05   21.29
   2  -5   1 2054.10   32.20
  -2  -5  -1 2347.52   28.22
   2  -5   1 2523.64   20.34
  -2  -5   0 1044.62   13.77
  -2  -5   0  920.09   20.78
   2  -5   0 1028.57   17.61
   2  -5   0  903.38   11.38
  -2  -4  -9   33.46    9.69
   2  -4   9   41.87    9.48
  -2  -4  -9   35.09   10.62
  -2  -4  -9   31.91    9.10
  -2  -4  -8  392.03   11.63
   2  -4   8  350.50   10.93
  -2  -4  -8  324.90   11.23
  -2  -4  -8  318.41   12.28
  -2  -4  -7  112.16   11.30
  -2  -4  -7  146.47   10.46
  -2  -4  -7  140.37    9.23
   2  -4   7  185.95   11.76
  -2  -4  -6  697.09   11.68
  -2  -4  -6  722.77   14.07
   2  -4   6  704.83   12.47
  -2  -4  -6  682.87   12.18
  -2  -4  -5   95.99   12.79
  -2  -4  -5   97.64    8.23
  -2  -4  -5  101.79    8.33
   2  -4   5   84.68    9.43
  -2  -4  -4  506.14   13.13
  -2  -4  -4  634.72   13.21
  -2  -4  -4  570.20   14.10
   2  -4   4  562.16   10.58
   2  -4   3  573.79   10.54
  -2  -4  -3  574.71   12.10
  -2  -4  -3  654.87   11.61
  -2  -4  -3  553.02   13.40
  -2  -4  -2 2960.81   23.64
  -2  -4  -2 2886.71   28.37
   2  -4   2 3155.68   24.00
  -2  -4  -1 1177.03   14.59
   2  -4   1 1162.61   13.00
   2  -4   1  876.78   19.23
  -2  -4  -1 1098.29   18.31
   2  -4   0 5481.19   55.19
  -2  -4   0 5414.59   37.58
   2  -4   0 5275.07   39.24
  -2  -4   0 5125.99   52.43
  -2  -3  -9  184.58   10.34
   2  -3   9  147.45   10.19
  -2  -3  -9  145.08   11.59
  -2  -3  -9  203.24   13.00
  -2  -3  -8   73.37   10.22
   2  -3   8   80.71   10.44
  -2  -3  -8  140.53    9.88
  -2  -3  -8   87.52    9.53
  -2  -3  -7  388.53   11.57
  -2  -3  -7  436.49   11.39
  -2  -3  -7  391.50   10.62
   2  -3   7  435.91   13.08
  -2  -3  -6  308.06    9.57
  -2  -3  -6  283.02   10.00
   2  -3   6  324.29   10.33
  -2  -3  -6  359.22   12.40
  -2  -3  -5 1215.45   15.13
  -2  -3  -5 1221.59   15.22
   2  -3   5 1263.23   15.02
  -2  -3  -5 1331.01   15.87
   2  -3   4  113.82    8.22
  -2  -3  -4  135.28    8.89
  -2  -3  -4  114.35   11.18
  -2  -3  -4  130.10    8.40
  -2  -3  -3 1050.42   15.33
  -2  -3  -3 1121.72   14.10
   2  -3   3 1104.73   14.99
  -2  -3  -3 1102.50   16.66
   2  -3   2  186.37    7.50
  -2  -3  -2  198.75   11.31
  -2  -3  -2  149.96    9.45
  -2  -3  -1 1098.85   17.53
   2  -3   1 1280.66   14.01
   2  -3   1  947.24   18.92
  -2  -3  -1 1318.76   16.25
   2  -3   0  829.15   16.10
   2  -3   0 1037.01   12.88
  -2  -3   0 1084.35   14.83
  -2  -3   0 1085.07   20.03
   2  -2   9   51.05    9.85
  -2  -2  -9   48.73   10.62
  -2  -2  -9   41.54   12.53
  -2  -2  -9   36.78    9.57
  -2  -2  -8  310.98   10.80
  -2  -2  -8  296.74   11.78
   2  -2   8  299.75   11.16
  -2  -2  -8  304.60   11.98
  -2  -2  -7  130.51    9.86
  -2  -2  -7  146.76    9.85
  -2  -2  -7  145.74    9.26
   2  -2   7  138.22   11.70
  -2  -2  -6  756.18   13.19
  -2  -2  -6  727.17   13.52
   2  -2   6  718.41   12.26
  -2  -2  -6  780.62   12.55
   2  -2   5  465.68   11.51
  -2  -2  -5  524.28   10.49
  -2  -2  -5  492.44   11.16
  -2  -2  -5  516.08   11.66
  -2  -2  -4  675.84   14.53
  -2  -2  -4  687.76   11.57
   2  -2   4  576.03   11.07
  -2  -2  -4  615.97   13.87
  -2  -2  -3  130.15    8.01
  -2  -2  -3   90.42   11.35
   2  -2   3  102.69    8.01
  -2  -2  -3   62.04    7.68
   2  -2   2 2460.44   30.31
   2  -2   2 2498.91   21.01
  -2  -2  -2 2471.29   24.50
  -2  -2  -2 2619.05   24.05
   2  -2   1 4136.33   30.61
  -2  -2  -1 3807.55   35.05
  -2  -2  -1 4172.04   33.63
   2  -2   1 3710.23   37.93
   2  -2   0  512.65   12.37
   2  -2   0  534.60    9.62
  -2  -2   0  512.58   10.61
  -2  -2   0  569.87   13.57
  -2  -1  -9  150.13   11.76
  -2  -1  -9  142.24    9.79
   2  -1   9  137.58   11.73
  -2  -1  -9  101.37   11.39
  -2  -1  -8   63.32    9.87
   2  -1   8   56.05   12.09
  -2  -1  -8   50.80    9.71
  -2  -1  -8   88.00    9.27
   2  -1   7  455.29   14.74
  -2  -1  -7  420.88   11.41
  -2  -1  -7  458.66   11.66
  -2  -1  -7  531.62   12.09
  -2  -1  -6   34.42   11.76
   2  -1   6   26.68    8.77
  -2  -1  -6   33.71    8.52
  -2  -1  -6   37.34    8.99
  -2  -1  -5  651.46   12.08
  -2  -1  -5  625.57   12.71
  -2  -1  -5  715.49   13.80
   2  -1   5  603.71   12.18
  -2  -1  -4 1061.18   14.67
  -2  -1  -4 1166.02   15.09
  -2  -1  -4 1149.95   14.69
   2  -1   4 1048.21   13.52
  -2  -1  -3 2049.64   21.02
  -2  -1  -3 2129.81   21.78
   2  -1   3 1899.50   18.11
  -2  -1  -3 2264.78   23.10
   2  -1   2 1041.97   13.61
  -2  -1  -2 1170.98   16.12
   2  -1   2 1170.44   18.08
  -2  -1  -2 1229.19   16.83
  -2  -1  -1  686.18   12.62
  -2  -1  -1  693.37   12.96
   2  -1   1  701.19   12.02
   2  -1   1  689.85   15.29
   2  -1   0 1782.72   19.41
  -2  -1   0 2184.76   24.62
   2  -1   0 1735.70   22.00
  -2  -1   0 1922.56   20.86
  -2   0  -9   43.50   11.19
  -2   0  -9   10.63   10.23
  -2   0  -9   39.43   10.01
  -2   0  -8  163.13   12.34
  -2   0  -8  246.10   10.71
  -2   0  -8  233.46   11.15
  -2   0  -7   22.45   11.34
  -2   0  -7   20.41   12.02
  -2   0  -7   37.03   10.23
  -2   0  -6  286.68    9.61
  -2   0  -6  301.43   10.98
  -2   0  -6  279.52   10.86
  -2   0  -5  886.19   14.19
  -2   0  -5  891.75   13.99
  -2   0  -5  774.17   13.02
  -2   0  -4 2222.24   22.71
  -2   0  -4 2440.43   25.67
  -2   0  -4 2357.02   20.73
  -2   0  -3  920.97   14.37
  -2   0  -3  833.53   12.93
  -2   0  -3  900.98   14.77
  -2   0  -2 2671.28   26.87
  -2   0  -2 2936.48   26.42
  -2   0  -1 3142.49   28.02
  -2   0  -1 3062.76   30.25
  -2   0   0  891.57   14.10
  -2   0   0  725.14   13.32
  -2   0   1   37.86    6.69
  -2   0   1   40.78    7.58
  -2   0   2   67.40    6.38
  -2   0   2   63.38    6.13
  -2   0   3 2252.10   22.64
  -2   0   3 2260.34   23.98
  -2   0   4 1724.87   18.58
  -2   0   4 1727.06   18.06
  -2   0   5 1096.20   13.73
  -2   0   5 1075.37   14.88
  -2   0   6  417.45    9.87
  -2   0   6  471.20   10.40
  -2   0   7  109.38    9.00
  -2   0   7  121.07    7.39
  -2   0   8  254.04    8.75
  -2   0   8  259.33   12.42
  -2   0   9   68.21    9.33
  -2   0   9   69.04    7.80
  -2   0  10  217.11    9.76
  -2   0  10  214.71    9.87
  -2   0  11    2.24    9.92
  -2   1   1 1663.29   21.11
   2   1  -1 1545.63   22.08
  -2   1   1 1621.74   21.66
   2   1  -1 1668.29   20.16
   2   1  -2 1108.57   15.60
  -2   1   2 1074.69   15.78
  -2   1   2 1079.51   15.20
  -2   1   3 3712.30   31.65
   2   1  -3 3623.59   36.31
  -2   1   3 3772.65   33.30
   2   1  -3 3964.19   36.27
  -2   1   4   51.17    6.84
  -2   1   4   67.67    6.44
   2   1  -4   62.97    6.41
   2   1  -4   69.05    8.20
  -2   1   5  456.88    9.34
  -2   1   5  478.29    9.74
   2   1  -5  515.42   10.22
   2   1  -5  432.88   11.45
  -2   1   6  299.15    9.35
  -2   1   6  288.17   11.38
   2   1  -6  331.73    8.97
   2   1  -6  324.41   13.31
   2   1  -7  683.11   12.59
  -2   1   7  651.27   11.43
   2   1  -7  691.68   12.32
  -2   1   7  754.71   14.17
  -2   1   8  166.35    9.77
  -2   1   8  213.87    8.12
   2   1  -8  206.66   10.19
   2   1  -8  224.38   11.34
  -2   1   9  167.20    9.14
  -2   1   9  142.46    9.18
   2   1  -9  144.41    9.28
   2   1  -9  154.65   10.28
  -2   1  10   80.21    9.88
  -2   1  10   60.88    8.98
   2   1 -10   67.26    9.08
   2   1 -10   95.41   11.95
  -2   1  11  236.45   10.40
   2   1 -11  255.09   14.61
   2   1 -11  237.18   13.14
   2   2  -1  406.21    9.69
  -2   2   1  358.46    8.39
   2   2  -1  455.49   14.72
  -2   2   1  420.29   10.33
  -2   2   2 1383.52   17.29
  -2   2   2 1464.47   17.87
   2   2  -2 1533.23   18.28
  -2   2   3  325.50    8.62
   2   2  -3  335.67    9.04
  -2   2   3  344.69    8.88
   2   2  -4 2740.86   27.86
  -2   2   4 3130.60   25.13
   2   2  -4 3477.51   31.25
  -2   2   4 3405.81   26.60
  -2   2   5  139.88    7.47
   2   2  -5  169.30   13.53
   2   2  -5  160.25    7.78
  -2   2   5  180.51    7.97
  -2   2   6 1199.91   14.42
   2   2  -6 1282.37   16.70
  -2   2   6 1327.06   14.44
   2   2  -6 1288.18   16.49
   2   2  -7   99.49    9.79
  -2   2   7  129.84    9.51
  -2   2   7   93.44    7.63
   2   2  -7   97.08    7.76
  -2   2   8  938.62   13.04
   2   2  -8  649.61   12.25
  -2   2   8  997.02   13.50
   2   2  -8  955.62   16.18
  -2   2   9  159.93    9.15
   2   2  -9  141.03   10.07
   2   2  -9  139.41   11.97
  -2   2   9  206.16    9.39
  -2   2  10  210.82   10.97
   2   2 -10  154.39   12.86
  -2   2  10  211.16   10.50
   2   2 -10  219.71   10.60
   2   2 -11   20.20   14.11
  -2   2  11   68.48   11.70
   2   2 -11   22.96   10.16
  -2   3   1 1760.71   19.59
  -2   3   1 1735.55   21.72
   2   3  -1 1745.56   41.70
   2   3  -1 1572.96   17.40
  -2   3   2  583.06   11.28
   2   3  -2  416.71   18.08
  -2   3   2  554.30   10.40
   2   3  -2  586.78   12.06
   2   3  -3 2175.61   23.58
  -2   3   3 2211.60   20.42
  -2   3   3 2164.44   20.33
  -2   3   4  137.14    6.90
  -2   3   4  157.29    8.89
   2   3  -4  141.16   11.14
   2   3  -4  156.37    7.56
  -2   3   5 2680.80   21.06
  -2   3   5 2448.90   20.66
   2   3  -5 2537.50   25.81
   2   3  -5 2626.51   26.05
  -2   3   6  377.93    9.57
   2   3  -6  411.63    9.74
   2   3  -6  427.56   14.36
  -2   3   6  335.42    8.45
  -2   3   7 1866.34   17.79
  -2   3   7 1698.10   18.99
   2   3  -7 1847.46   23.96
   2   3  -7 1824.66   20.60
   2   3  -8  166.16   12.88
  -2   3   8  111.26    8.75
   2   3  -8  152.51   11.42
  -2   3   8  152.15    9.38
  -2   3   9  352.10   10.82
   2   3  -9  309.16   12.00
  -2   3   9  312.55    9.77
   2   3  -9  329.39   11.45
   2   3 -10  111.19   12.83
  -2   3  10  100.31   10.66
   2   3 -10  113.94   13.60
  -2   3  11  129.56   12.51
   2   3 -11  115.40   10.23
   2   3 -11  108.86   13.76
   2   4  -1  248.52    8.35
  -2   4   1  260.71    8.96
   2   4  -2 1899.15   41.23
  -2   4   2 2178.68   23.65
   2   4  -2 1842.52   19.43
  -2   4   3  232.11    9.45
  -2   4   3  223.97    7.66
   2   4  -3  215.68    8.56
   2   4  -3  229.19   15.40
  -2   4   4 1576.02   15.55
   2   4  -4 1724.13   20.43
  -2   4   4 1691.37   15.87
   2   4  -5  306.27    9.41
  -2   4   5  261.75    8.12
   2   4  -5  282.16   14.24
  -2   4   5  262.29    7.94
  -2   4   6  846.02   12.47
   2   4  -6  887.11   13.97
  -2   4   6  723.98   11.20
   2   4  -6  821.18   14.46
  -2   4   7  277.05    9.45
   2   4  -7  310.96   11.86
  -2   4   7  309.67    9.78
   2   4  -7  311.82   10.63
  -2   4   8  965.97   15.07
   2   4  -8 1081.10   18.83
  -2   4   8 1089.09   14.37
   2   4  -8 1093.05   17.22
  -2   4   9   79.23    9.74
   2   4  -9  123.86   10.70
   2   4  -9  115.37   12.36
  -2   4   9  132.42   10.76
  -2   4  10  266.04   10.58
   2   4 -10  254.44   14.79
   2   4 -10  235.74   11.84
   2   4 -11   68.99    9.77
  -2   4  11   87.51   10.71
   2   4 -11   81.99   14.18
  -2   5   1 3452.77   35.72
   2   5  -1 3115.66   25.34
  -2   5   2 2138.93   22.70
   2   5  -2 2061.14   20.45
   2   5  -2 1958.64   45.64
  -2   5   3  549.70    9.46
   2   5  -3  533.99   14.71
   2   5  -3  508.71   10.64
  -2   5   3  556.17   11.60
   2   5  -4 1175.59   15.79
  -2   5   4 1152.40   13.20
  -2   5   4 1257.82   13.64
   2   5  -5 1278.43   18.46
  -2   5   5 1177.52   12.95
  -2   5   5 1106.69   13.87
   2   5  -5 1093.66   17.91
   2   5  -6  248.17    9.29
  -2   5   6  202.38    8.45
  -2   5   6  202.52    9.66
   2   5  -6  222.82   13.09
   2   5  -7  588.72   13.26
  -2   5   7  477.97   10.19
  -2   5   7  581.35   10.80
   2   5  -7  559.11   13.32
  -2   5   8   68.39   12.18
   2   5  -8  102.32   12.77
  -2   5   8   57.58   10.29
   2   5  -8   72.53   10.26
  -2   5   9  140.46    8.64
   2   5  -9  180.52   10.97
   2   5  -9  155.07   17.15
  -2   5   9  127.53   13.32
   2   5 -10   72.37   11.16
   2   5 -10   50.94   14.44
  -2   5  10   54.62   10.69
  -2   6   1 1017.49   17.51
   2   6  -1  921.46   13.13
  -2   6   2 3005.73   29.55
   2   6  -2 2650.97   23.07
  -2   6   3  332.60    8.01
   2   6  -3  370.14   13.39
   2   6  -3  315.98    9.36
  -2   6   3  296.84    8.53
  -2   6   4  584.87    9.82
  -2   6   4  545.32    9.88
   2   6  -4  603.80   13.51
   2   6  -4  621.55   14.01
  -2   6   5  554.91    9.75
  -2   6   5  473.05    9.31
   2   6  -5  511.42   11.33
   2   6  -6  218.18   10.01
  -2   6   6  212.64    9.41
  -2   6   6  160.79    8.17
   2   6  -6  223.04   10.07
  -2   6   7   36.82    7.74
   2   6  -7   79.61    9.98
  -2   6   7   85.90    8.94
   2   6  -7   84.73   10.46
   2   6  -8  275.74   13.72
  -2   6   8  243.75   10.88
  -2   6   8  207.68   10.66
   2   6  -8  231.72   11.02
   2   6  -9  163.15   15.23
  -2   6   9  146.04   10.73
   2   6  -9  143.07   11.81
   2   6 -10  224.59   12.94
   2   6 -10  244.64   18.83
  -2   6  10  200.85   11.80
   2   7  -1  954.57   13.05
  -2   7   1 1020.10   16.41
  -2   7   2  630.19   12.00
   2   7  -2  596.95   11.35
  -2   7   3  748.69   13.18
   2   7  -3  737.86   14.30
  -2   7   3  648.17    9.99
   2   7  -3  712.42   12.44
  -2   7   4  206.35    7.48
   2   7  -4  219.99    8.78
   2   7  -4  201.20    8.19
  -2   7   4  191.19    7.84
  -2   7   5  826.86   11.67
   2   7  -5  813.92   13.75
  -2   7   5  813.70   11.84
  -2   7   6   60.88    7.63
  -2   7   6   85.33    8.63
   2   7  -6   99.30    9.71
   2   7  -6   68.14    8.61
  -2   7   7  338.08   10.13
  -2   7   7  299.22    9.10
   2   7  -7  315.23   12.00
   2   7  -7  355.50   14.47
   2   7  -8  134.72   12.10
  -2   7   8  126.15   10.00
   2   7  -8  134.71   11.01
   2   7  -9  268.72   17.69
   2   7  -9  274.55   12.74
  -2   7   9  256.92   12.06
  -2   7  10   58.54   11.47
   2   7 -10   73.57   16.09
   2   7 -10   86.58   12.33
  -2   8   1  678.51   15.84
   2   8  -1  594.19   11.43
   2   8  -2  973.77   14.30
  -2   8   2 1030.15   15.42
   2   8  -3  243.68    9.35
  -2   8   3  284.41    8.90
   2   8  -3  255.15    9.72
   2   8  -4  911.41   15.50
  -2   8   4  932.48   12.14
   2   8  -4  921.45   14.29
  -2   8   4  810.12   12.13
  -2   8   5  320.67    9.00
   2   8  -5  285.50   10.06
  -2   8   5  289.30   12.45
   2   8  -5  285.53   10.06
  -2   8   6 1308.15   14.98
  -2   8   6 1074.01   12.97
   2   8  -6 1250.01   21.11
  -2   8   7   10.12    8.14
   2   8  -7   29.56    9.61
   2   8  -7   32.55    9.68
  -2   8   7   58.66    9.40
   2   8  -8  404.78   14.87
   2   8  -8  277.27   14.95
  -2   8   8  404.82   11.97
  -2   8   9   93.66   10.99
   2   8  -9   84.19   14.18
   2   8  -9  146.97   14.49
  -2   8  10  223.80   12.40
   2   8 -10  186.30   17.89
   2   8 -10  282.77   14.10
   2   9  -1  963.81   14.91
   2   9  -2  559.22   11.45
   2   9  -3  931.39   18.11
  -2   9   3  819.95   13.07
   2   9  -3  838.18   15.30
  -2   9   4   38.66    7.03
  -2   9   4   41.23    8.13
   2   9  -4   30.83    8.29
   2   9  -4   32.24    6.22
  -2   9   5 1021.37   13.23
  -2   9   5  949.90   13.49
   2   9  -5 1140.99   18.00
   2   9  -5 1056.40   18.65
  -2   9   6  135.11    8.75
   2   9  -6  101.64   11.59
  -2   9   7  617.66   13.74
   2   9  -7  612.70   14.46
   2   9  -7  438.81   13.90
   2   9  -8  206.19   11.24
   2   9  -8  170.51   15.26
  -2   9   8  237.58   11.14
  -2   9   9  413.92   12.92
   2   9  -9  427.72   15.08
   2   9  -9  318.19   17.16
   2   9 -10   57.51   13.12
  -2   9  10   51.88   11.86
   2   9 -10   24.44   13.17
   2  10  -1  453.42   12.60
   2  10  -2 1052.85   16.19
   2  10  -3  427.20   13.10
   2  10  -4 1109.99   16.53
  -2  10   4 1053.45   13.63
   2  10  -4 1174.71   19.05
  -2  10   5  191.94   10.15
   2  10  -5  214.40    8.72
   2  10  -5  187.59   10.95
  -2  10   6  562.43   10.86
   2  10  -6  606.47   12.90
   2  10  -6  573.57   17.03
  -2  10   7   72.77    8.91
   2  10  -7   79.64   13.72
  -2  10   8  419.73   11.74
   2  10  -8  361.08   13.20
   2  10  -8  288.61   14.30
   2  10  -9   53.51   15.12
  -2  10   9   85.92   12.01
   2  10  -9  101.28   14.68
   2  11  -1 1115.42   14.61
   2  11  -2  183.67    8.87
   2  11  -3  722.36   16.96
   2  11  -4   77.42   10.16
   2  11  -4   87.28   10.45
  -2  11   5  385.68    9.86
   2  11  -5  375.76   11.44
   2  11  -5  394.80   14.02
  -2  11   6  208.74    9.13
   2  11  -6  248.50    9.14
   2  11  -6  230.33   14.08
   2  11  -7  255.22   11.25
  -2  11   7  226.46   12.41
   2  11  -7  215.68   16.61
  -2  11   8  179.12   12.88
   2  11  -8  114.56   18.34
  -2  11   9  183.16   12.17
   2  11  -9  222.31   15.90
   2  11  -9  117.23   20.67
   2  12  -1  223.77    9.83
   2  12  -2  495.17   12.91
   2  12  -3   72.03   10.05
   2  12  -4  628.14   17.88
   2  12  -5  109.96    7.88
   2  12  -5  113.94   11.93
   2  12  -6  265.10   10.11
  -2  12   6  298.49   12.03
   2  12  -6  234.24   15.04
   2  12  -7  141.42   18.51
  -2  12   7  173.54    9.28
   2  12  -7  159.02   13.90
  -2  12   8  204.82   11.39
   2  12  -8  168.85   13.76
   2  12  -8   79.98   20.53
   2  13  -2   42.22    8.97
   2  13  -3   72.67   10.03
   2  13  -4  155.02   13.99
   2  13  -5  551.11   13.95
   2  13  -5  452.05   15.92
   2  13  -6  152.51    9.07
   2  13  -6  151.74   16.44
  -2  13   6  160.78    9.12
   2  13  -7  262.04   10.87
  -2  13   7  343.84   13.23
   2  13  -7  111.17   19.14
  -2  13   8   44.44   12.65
   2  13  -8   21.62   10.11
   2  14  -3   31.59   10.69
   2  14  -4  307.01   15.96
   2  14  -5   90.04   16.64
   2  14  -6  246.12   11.75
  -2  14   7   43.48    8.87
   2  14  -7   18.88    8.03
   2  15  -7  121.68    9.83
  -1 -19   0  124.42   14.70
   1 -19   0   71.82   10.87
  -1 -19   0   88.35   13.98
   1 -19   0   82.33   14.33
   1 -19   0   69.12   10.84
  -1 -19   0  115.35   14.35
   1 -19   0  150.59   15.65
  -1 -18  -3  119.68   11.91
  -1 -18  -3   70.83   11.49
  -1 -18  -3   94.28   11.34
  -1 -18  -3  173.61   12.31
   1 -18   3   91.46   10.46
   1 -18   3  154.62   11.93
   1 -18   2    4.32   10.48
  -1 -18  -2   34.56   11.14
  -1 -18  -2   46.40   13.27
   1 -18   2   37.20   13.11
   1 -18   2   11.53   12.92
  -1 -18  -2   62.87   10.98
   1 -18   2   18.12    9.09
  -1 -18  -2   18.29   11.10
  -1 -18  -1  129.19   16.18
   1 -18   1  159.84   12.21
  -1 -18  -1  201.40   12.64
   1 -18   1  133.50   12.54
   1 -18   1   91.85   11.85
  -1 -18  -1  114.09   11.23
   1 -18   1  198.82   13.02
  -1 -18  -1   78.32   10.98
   1 -18   0   10.36    9.42
  -1 -18   0   21.69   12.41
  -1 -18   0   34.80   13.14
   1 -18   0   37.30   11.71
  -1 -18   0   13.16    9.86
   1 -18   0   28.77   10.72
  -1 -18   0   46.14   10.82
   1 -18   0   17.21    9.85
   1 -17   4  199.77   14.19
  -1 -17  -4  255.39   17.26
  -1 -17  -4   99.56   10.66
  -1 -17  -4  129.01   10.72
   1 -17   4  164.86    9.50
  -1 -17  -4  190.65   12.49
   1 -17   3   11.19    8.95
  -1 -17  -3    6.70    9.87
  -1 -17  -3    4.82    9.70
  -1 -17  -3    7.43   10.85
   1 -17   3   22.85   11.11
  -1 -17  -3    9.53   12.34
   1 -17   2   59.97   12.58
  -1 -17  -2  115.70   11.84
   1 -17   2   78.17    8.84
   1 -17   2   82.03   12.60
  -1 -17  -2   81.09   11.14
  -1 -17  -2  166.46   11.48
   1 -17   2  185.76   14.10
  -1 -17  -2  106.19   11.84
  -1 -17  -1   40.86   10.18
  -1 -17  -1   35.32    9.53
  -1 -17  -1   25.16   12.78
   1 -17   1   18.53   12.41
   1 -17   1   32.58   10.63
   1 -17   1   13.65   11.78
   1 -17   1   15.25    9.15
  -1 -17  -1   17.60   12.35
  -1 -17   0  404.38   12.75
   1 -17   0  467.81   12.45
  -1 -17   0  397.52   13.15
   1 -17   0  494.35   15.94
   1 -17   0  651.95   17.29
   1 -17   0  415.46   14.63
  -1 -17   0  563.30   17.16
  -1 -17   0  470.30   17.44
  -1 -16  -5  113.17   12.97
   1 -16   5  160.52   14.27
  -1 -16  -5  194.08   17.32
  -1 -16  -5  123.39   10.85
   1 -16   4   42.64   10.69
  -1 -16  -4   43.38   10.04
  -1 -16  -4   22.83    9.68
  -1 -16  -4   57.46   13.04
  -1 -16  -4   25.00    9.52
  -1 -16  -3  234.64   11.61
  -1 -16  -3  388.12   14.88
  -1 -16  -3  353.49   14.21
  -1 -16  -3  281.26   12.13
   1 -16   3  270.44   10.11
   1 -16   3  349.45   14.71
  -1 -16  -2   22.23    9.88
  -1 -16  -2   12.60    8.97
  -1 -16  -2   17.36   10.22
   1 -16   2    2.93   10.15
   1 -16   2    2.22   10.30
   1 -16   2    1.40    9.89
  -1 -16  -2   44.10   12.01
   1 -16   2   13.13   11.16
   1 -16   1  265.82   11.65
   1 -16   1  467.15   14.93
   1 -16   1  336.00   14.32
  -1 -16  -1  375.54   13.22
  -1 -16  -1  515.51   17.38
   1 -16   1  289.14   12.25
  -1 -16  -1  290.59   12.14
  -1 -16  -1  323.05   11.83
   1 -16   0    8.98    9.32
  -1 -16   0   31.88   10.44
   1 -16   0   30.79    9.21
  -1 -16   0   22.19    9.09
  -1 -16   0   35.75    8.07
   1 -16   0   21.32   14.05
  -1 -16   0   13.03    9.30
   1 -16   0   18.28    9.94
  -1 -15  -6  285.84   13.07
  -1 -15  -6  219.46   10.73
   1 -15   6  238.77   13.87
  -1 -15  -6  202.73   10.52
  -1 -15  -5   23.65    9.50
  -1 -15  -5   43.67    9.35
   1 -15   5   41.20   10.51
  -1 -15  -5   25.14   11.34
  -1 -15  -4  338.37   12.90
   1 -15   4  301.62   12.46
  -1 -15  -4  214.18   11.17
  -1 -15  -4  249.55   12.56
   1 -15   3   29.90    9.07
  -1 -15  -3   27.61    8.85
  -1 -15  -3   59.85    9.93
  -1 -15  -3   50.55    9.19
  -1 -15  -3    9.90   12.44
  -1 -15  -2  270.31   11.77
  -1 -15  -2  196.28   13.05
   1 -15   2  190.06   13.80
   1 -15   2  242.29   10.84
   1 -15   2  271.89    9.61
  -1 -15  -2  249.89   11.65
  -1 -15  -2  246.80   10.98
   1 -15   2  183.81   12.08
  -1 -15  -1   85.45    9.66
   1 -15   1   75.26   11.90
  -1 -15  -1   83.52    9.08
   1 -15   1   17.30    7.31
   1 -15   1   82.48   11.83
  -1 -15  -1   67.10    9.24
   1 -15   1  109.42   12.02
  -1 -15  -1   63.65    9.03
   1 -15   0  390.60   12.21
  -1 -15   0  425.18   12.21
   1 -15   0  471.72   10.64
  -1 -15   0  559.32   14.48
  -1 -15   0  412.75   11.13
   1 -15   0  424.63   12.69
  -1 -15   0  371.43   14.05
   1 -15   0  572.69   12.72
   1 -14   6   31.66   13.27
  -1 -14  -6   35.47    9.79
  -1 -14  -6   54.65   11.41
  -1 -14  -6   31.44    9.49
  -1 -14  -5  184.33   11.07
   1 -14   5  168.52   11.10
  -1 -14  -5  175.62   11.47
  -1 -14  -5  150.87   10.72
  -1 -14  -4   92.36    9.55
   1 -14   4  129.35    9.45
  -1 -14  -4  139.26   12.44
  -1 -14  -4   89.55    9.38
   1 -14   3  606.36   12.06
  -1 -14  -3  489.35   12.27
  -1 -14  -3  527.14   12.05
  -1 -14  -3  654.15   13.29
  -1 -14  -2   57.53    9.95
  -1 -14  -2   79.37    9.71
   1 -14   2   69.58   11.09
  -1 -14  -2   81.43    8.03
   1 -14   2   81.92    9.02
   1 -14   2   62.23   11.69
   1 -14   2   68.17    7.71
  -1 -14  -2   87.54   11.85
  -1 -14  -1  637.76   13.51
  -1 -14  -1  597.22   14.35
  -1 -14  -1  714.29   14.68
   1 -14   1  740.68   15.09
   1 -14   1  378.48    9.84
   1 -14   1  501.44   13.16
  -1 -14  -1  429.71   10.86
   1 -14   1  577.58   15.58
   1 -14   0   48.61    9.01
   1 -14   0   67.10    8.16
  -1 -14   0   64.73   10.86
  -1 -14   0   66.64   12.78
   1 -14   0   53.85    9.62
  -1 -14   0   36.42    8.08
  -1 -14   0   58.92   10.29
   1 -14   0   46.22    9.08
  -1 -13  -7   62.44   14.13
  -1 -13  -7   85.42   10.07
   1 -13   7   68.45   14.09
  -1 -13  -7   53.95    9.26
  -1 -13  -6  320.43   11.39
   1 -13   6  333.50   13.04
  -1 -13  -6  393.06   14.76
  -1 -13  -6  273.00   10.89
  -1 -13  -5   54.03    9.96
   1 -13   5   91.32   11.96
  -1 -13  -5   83.95   12.86
  -1 -13  -5   47.87    9.55
   1 -13   4  341.92   13.54
  -1 -13  -4  303.06   10.12
  -1 -13  -4  367.55   12.16
  -1 -13  -4  248.18    9.80
  -1 -13  -3   84.50    9.29
  -1 -13  -3  112.17   11.59
  -1 -13  -3  138.96   10.41
   1 -13   3  135.10    9.08
  -1 -13  -2  713.85   14.40
  -1 -13  -2  626.29   12.28
   1 -13   2  769.57   14.22
   1 -13   2  622.65   17.23
  -1 -13  -2  608.71   12.02
   1 -13   2  664.05   18.88
  -1 -13  -2  765.27   13.96
   1 -13   1   45.92    7.13
  -1 -13  -1   43.42    6.88
  -1 -13  -1   46.10    8.21
   1 -13   1   40.72    8.55
   1 -13   1   53.24    7.88
   1 -13   1   38.80   10.67
  -1 -13  -1   42.90   11.47
  -1 -13  -1   56.30   10.63
  -1 -13   0  328.40   10.01
   1 -13   0  335.64    9.49
  -1 -13   0  374.96   10.53
  -1 -13   0  452.15   13.13
   1 -13   0  386.47   10.18
   1 -13   0  333.06   11.12
   1 -13   0  372.76   11.75
  -1 -13   0  366.88   11.30
  -1 -12  -7   54.40   11.24
  -1 -12  -7  147.98   10.04
  -1 -12  -7  123.07   13.12
   1 -12   7  131.28   11.96
  -1 -12  -6   35.61    9.13
   1 -12   6    5.98    9.90
  -1 -12  -6   38.48   12.82
  -1 -12  -6   27.73    8.47
   1 -12   5  359.81   13.14
  -1 -12  -5  305.98   10.64
  -1 -12  -5  329.83   14.28
  -1 -12  -5  254.43   12.28
   1 -12   4   26.58   10.99
  -1 -12  -4   56.47    9.00
  -1 -12  -4   -0.22    8.88
  -1 -12  -4   33.90    9.02
  -1 -12  -3  476.98   14.10
   1 -12   3  406.24   10.30
  -1 -12  -3  411.63   10.83
  -1 -12  -3  439.75   11.24
  -1 -12  -2  245.06    9.73
  -1 -12  -2  228.94    9.59
   1 -12   2  216.52   11.86
   1 -12   2  222.89   11.37
   1 -12   2  281.58    9.16
  -1 -12  -2  266.04   12.34
  -1 -12  -1 1345.86   21.52
  -1 -12  -1 1225.12   16.16
   1 -12   1 1287.56   21.14
   1 -12   1 1122.45   18.13
  -1 -12  -1 1301.30   17.23
   1 -12   1 1156.82   14.17
  -1 -12  -1  839.41   13.46
   1 -12   1 1433.54   17.43
  -1 -12   0   96.62    9.43
  -1 -12   0   90.63    8.43
  -1 -12   0  115.37   11.38
   1 -12   0   95.37    7.20
   1 -12   0  105.32   12.20
   1 -12   0   98.95    7.26
  -1 -12   0   85.89    8.63
   1 -12   0   90.86    9.05
  -1 -11  -8   60.31   11.92
   1 -11   8   52.01   12.42
  -1 -11  -8  115.77   13.96
  -1 -11  -8   65.75    9.88
  -1 -11  -7   19.55    8.36
  -1 -11  -7   24.53   12.69
   1 -11   7   34.50   13.41
  -1 -11  -7   19.52   12.72
  -1 -11  -6  315.52   10.75
  -1 -11  -6  393.67   14.67
   1 -11   6  427.55   13.06
  -1 -11  -6  244.50   11.96
  -1 -11  -5   21.25    8.84
  -1 -11  -5   25.47   10.20
   1 -11   5   18.12    8.85
  -1 -11  -5   43.69   12.68
   1 -11   4  323.47   13.54
  -1 -11  -4  337.03   11.08
  -1 -11  -4  239.69    9.77
  -1 -11  -4  329.72   10.74
  -1 -11  -3   12.21    9.04
  -1 -11  -3   32.33   11.29
  -1 -11  -3    9.30    8.54
   1 -11   3   38.10    8.01
  -1 -11  -2 1899.76   18.83
   1 -11   2 1801.91   30.76
  -1 -11  -2 2038.55   22.94
   1 -11   2 1599.45   25.45
  -1 -11  -2 1726.32   18.05
   1 -11   2 1939.18   17.77
  -1 -11  -1   24.67    7.92
  -1 -11  -1    8.04    6.46
  -1 -11  -1   17.89    7.41
   1 -11   1   18.04    8.49
   1 -11   1   18.92    9.82
   1 -11   1    9.14    6.96
  -1 -11  -1   20.44    9.46
  -1 -11   0  821.69   14.92
  -1 -11   0  932.34   16.27
   1 -11   0  846.98   12.40
   1 -11   0  824.60   14.46
  -1 -11   0  804.08   12.95
  -1 -11   0  727.15   12.02
   1 -11   0  837.57   16.15
   1 -11   0  494.62    9.45
  -1 -10  -8    9.61    9.27
   1 -10   8   -4.20   13.71
  -1 -10  -8   25.64    9.31
  -1 -10  -8   21.02   10.06
  -1 -10  -7  209.10    9.97
  -1 -10  -7  247.39   10.80
  -1 -10  -7  256.60   11.36
   1 -10   7  278.50   14.23
  -1 -10  -6   33.66    9.28
  -1 -10  -6   26.68    8.55
   1 -10   6   41.41   11.86
  -1 -10  -6   52.22    9.82
  -1 -10  -5  655.66   12.31
   1 -10   5  620.17   12.49
  -1 -10  -5  571.00   11.70
  -1 -10  -5  494.01   10.97
  -1 -10  -4   29.06    7.99
  -1 -10  -4   27.19    8.63
  -1 -10  -4   40.78    8.70
   1 -10   4   16.85    8.52
  -1 -10  -3  519.96   11.03
  -1 -10  -3  510.08   11.14
  -1 -10  -3  580.36   11.85
   1 -10   3  537.78   10.22
  -1 -10  -2   58.41    8.56
   1 -10   2   71.52   10.95
   1 -10   2   55.14    9.19
   1 -10   2   72.93    6.90
  -1 -10  -2   89.35    9.07
  -1 -10  -2   91.65   10.87
  -1 -10  -1 1292.57   15.62
   1 -10   1 1482.44   16.06
   1 -10   1 1375.51   20.35
  -1 -10  -1 1439.79   16.43
   1 -10   1 1066.47   16.54
  -1 -10  -1 1360.73   18.33
   1 -10   0   68.96    6.34
  -1 -10   0   57.19    7.49
  -1 -10   0   78.52    8.16
   1 -10   0   62.93    6.47
  -1 -10   0   58.83    6.78
   1 -10   0   67.22    8.35
   1 -10   0   54.57    8.28
  -1  -9  -8  204.17   10.20
  -1  -9  -8  140.03   10.49
   1  -9   8  191.49   12.51
  -1  -9  -8  199.72   10.62
  -1  -9  -7   12.13    9.54
  -1  -9  -7   36.38    9.03
   1  -9   7   26.14   10.41
  -1  -9  -7   27.44    9.16
  -1  -9  -6  297.87   10.61
  -1  -9  -6  316.08   11.25
   1  -9   6  338.38   11.26
  -1  -9  -6  280.65    9.75
  -1  -9  -5  228.49    9.53
  -1  -9  -5  226.42    9.72
  -1  -9  -5  199.24    9.14
   1  -9   5  247.65    9.89
  -1  -9  -4 1042.08   13.34
   1  -9   4  978.89   14.03
  -1  -9  -4  924.62   14.41
  -1  -9  -4  832.59   11.89
   1  -9   3   29.98    7.17
  -1  -9  -3   30.88    8.64
  -1  -9  -3   22.51    8.26
  -1  -9  -3   34.71    7.76
  -1  -9  -2  970.28   14.95
   1  -9   2  906.13   25.33
   1  -9   2  744.93   21.06
   1  -9   2  935.02   11.81
  -1  -9  -2  896.20   13.81
  -1  -9  -2  858.86   13.98
  -1  -9  -1   98.17    8.48
  -1  -9  -1   79.06    7.93
   1  -9   1   87.67    8.48
   1  -9   1   83.89    9.82
   1  -9   1   87.69    7.23
  -1  -9  -1   87.20   10.06
  -1  -9   0 1159.75   16.94
  -1  -9   0 1333.84   20.17
   1  -9   0 1194.22   18.01
   1  -9   0 1217.83   15.77
   1  -9   0 1293.84   15.58
   1  -9   0 1269.60   18.12
  -1  -9   0 1161.72   14.55
  -1  -8  -9  234.44   10.99
  -1  -8  -9  173.13   11.46
  -1  -8  -9  195.80   12.31
   1  -8   9  223.01   13.81
  -1  -8  -8  120.37   11.82
  -1  -8  -8   88.43    9.55
  -1  -8  -8   94.58    8.98
   1  -8   8  103.60   11.46
  -1  -8  -7  256.98    9.87
  -1  -8  -7  293.51   12.22
  -1  -8  -7  323.24   10.49
   1  -8   7  361.16   12.56
  -1  -8  -6  142.45    9.50
  -1  -8  -6  104.69    9.03
  -1  -8  -6  128.31   11.61
   1  -8   6  129.80    9.36
  -1  -8  -5  864.84   11.84
   1  -8   5 1010.75   14.75
  -1  -8  -5 1081.18   17.52
  -1  -8  -5 1102.58   13.57
  -1  -8  -4   98.22    9.26
   1  -8   4  107.71    8.40
  -1  -8  -4  109.35    8.83
  -1  -8  -4  123.05    8.46
  -1  -8  -3  873.50   12.12
  -1  -8  -3  577.51   11.73
   1  -8   3  736.31   11.45
  -1  -8  -3  710.93   10.96
  -1  -8  -2  118.06    8.64
  -1  -8  -2  115.60   10.13
   1  -8   2  133.13   10.12
  -1  -8  -2  131.52    8.72
  -1  -8  -1  277.47    9.61
   1  -8   1  312.82    8.24
   1  -8   1  298.52   11.36
   1  -8   1  272.15   12.03
  -1  -8  -1  279.08    9.24
  -1  -8   0  160.64    8.65
   1  -8   0  159.36    6.99
  -1  -8   0  180.07    7.82
  -1  -8   0  161.00    8.07
   1  -8   0  192.49    9.01
   1  -8   0  177.91    9.35
   1  -8   0  172.59    9.65
   1  -7   9   68.84   10.69
  -1  -7  -9   51.03   10.96
  -1  -7  -9   44.05   10.91
  -1  -7  -9   45.24    9.92
  -1  -7  -8  387.07   10.86
  -1  -7  -8  439.54   11.23
  -1  -7  -8  394.50   12.30
   1  -7   8  479.21   15.15
  -1  -7  -7   10.85    8.21
  -1  -7  -7   42.68    8.26
  -1  -7  -7   37.20    8.91
   1  -7   7   33.94   10.18
  -1  -7  -6  627.02   11.70
  -1  -7  -6  565.82   12.06
  -1  -7  -6  485.03   12.58
   1  -7   6  589.17   11.96
   1  -7   5  379.40   14.83
  -1  -7  -5  296.75    9.24
  -1  -7  -5  363.19   10.61
  -1  -7  -5  455.63   10.40
  -1  -7  -4 1166.43   15.90
  -1  -7  -4 1376.71   15.51
   1  -7   4 1379.52   17.61
  -1  -7  -4 1265.94   15.89
  -1  -7  -3   44.20    7.94
   1  -7   3   40.23   10.33
  -1  -7  -3   32.60    8.02
  -1  -7  -3   10.92    7.06
  -1  -7  -2  975.25   12.89
   1  -7   2 1152.71   13.40
  -1  -7  -2 1189.56   14.60
  -1  -7  -2 1098.84   15.43
  -1  -7  -1  862.35   14.36
   1  -7   1  986.77   12.41
   1  -7   1  985.47   20.02
  -1  -7  -1  909.95   12.97
   1  -7   1  955.68   19.92
  -1  -7   0 1957.58   26.78
   1  -7   0 1843.16   19.23
   1  -7   0 1820.03   23.18
   1  -7   0 1794.29   24.50
  -1  -7   0 1795.29   18.95
  -1  -7   0 1756.84   23.96
  -1  -6  -9  107.29   12.35
  -1  -6  -9  255.42   10.75
   1  -6   9  221.51   11.36
  -1  -6  -9  220.71   10.32
   1  -6   8   31.06   10.19
  -1  -6  -8    4.92   10.43
  -1  -6  -8   19.27    8.18
  -1  -6  -8   23.15    9.43
  -1  -6  -7  300.04   12.48
  -1  -6  -7  393.03   12.38
  -1  -6  -7  348.63   12.42
   1  -6   7  349.78   13.70
  -1  -6  -6   87.15    9.10
   1  -6   6   82.82   12.15
  -1  -6  -6   87.10    8.88
  -1  -6  -6   91.15    9.50
   1  -6   5  860.24   13.61
  -1  -6  -5  519.69   10.65
  -1  -6  -5  944.02   13.04
  -1  -6  -5  838.11   13.26
   1  -6   4  120.90   12.24
  -1  -6  -4   99.33    6.98
  -1  -6  -4  110.67    7.75
  -1  -6  -4  108.01    9.13
  -1  -6  -3 1966.22   17.57
  -1  -6  -3 2696.61   22.98
   1  -6   3 1981.77   18.21
  -1  -6  -3 2247.90   23.18
  -1  -6  -2  630.10   10.70
   1  -6   2  703.53   10.87
  -1  -6  -2  753.04   11.83
  -1  -6  -2  678.85   14.51
  -1  -6  -1 2848.35   24.54
   1  -6   1 2807.33   39.06
  -1  -6  -1 2791.28   29.28
   1  -6   1 2818.88   23.58
   1  -6   1 2897.65   39.47
   1  -6   0  783.43   12.47
   1  -6   0  838.55   17.31
  -1  -6   0  815.98   15.37
  -1  -6   0  751.28   16.36
   1  -6   0  725.57   15.45
  -1  -5  -9   36.95    9.24
   1  -5   9   74.96    9.35
  -1  -5  -9   31.45    9.25
  -1  -5  -9   19.01   10.24
  -1  -5  -8  537.94   11.79
  -1  -5  -8  463.60   11.67
  -1  -5  -8  432.43   12.08
   1  -5   8  526.53   13.88
   1  -5   7    8.22    9.57
  -1  -5  -7   12.42    8.24
  -1  -5  -7    5.91    8.82
  -1  -5  -7  -12.54    8.67
   1  -5   6  733.25   14.47
  -1  -5  -6  783.28   13.82
  -1  -5  -6  699.15   12.04
  -1  -5  -6  545.83   11.74
  -1  -5  -5   54.45    8.41
  -1  -5  -5   61.39    8.15
  -1  -5  -5   66.08    9.16
   1  -5   5   64.91    8.56
  -1  -5  -4  846.71   11.94
   1  -5   4  671.12   12.01
  -1  -5  -4  751.04   12.83
  -1  -5  -4  693.11   10.83
  -1  -5  -3  365.53    9.18
   1  -5   3  522.15   10.96
  -1  -5  -3  545.10   10.85
  -1  -5  -3  484.47   11.31
  -1  -5  -2 2346.97   20.83
  -1  -5  -2 2826.26   23.72
   1  -5   2 2594.35   22.48
  -1  -5  -2 2510.71   25.58
  -1  -5  -1  621.79   13.71
   1  -5   1  591.16   19.66
   1  -5   1  575.78   10.41
  -1  -5  -1  614.37   11.94
   1  -5   1  513.36   19.26
  -1  -5   0 6510.00   48.01
   1  -5   0 6180.66   52.19
   1  -5   0 6397.96   60.82
  -1  -5   0 5713.19   59.13
  -1  -4  -9  213.05   11.16
  -1  -4  -9  234.76   10.48
   1  -4   9  216.69   12.23
  -1  -4  -9  204.28   11.68
  -1  -4  -8   20.52    9.33
   1  -4   8   10.41    9.44
  -1  -4  -8   62.73    9.62
  -1  -4  -8   16.97    8.67
   1  -4   7  402.79   11.48
  -1  -4  -7  259.22   10.20
  -1  -4  -7  390.42   13.46
  -1  -4  -7  372.39   10.84
  -1  -4  -6   60.83    8.26
   1  -4   6   93.18   11.98
  -1  -4  -6   74.24    8.13
  -1  -4  -6  105.88   11.25
  -1  -4  -5  943.75   14.30
   1  -4   5  932.96   16.09
  -1  -4  -5  810.71   12.24
  -1  -4  -5  898.17   12.85
   1  -4   4  248.65    9.43
  -1  -4  -4  215.08    8.05
  -1  -4  -4  300.20   10.84
  -1  -4  -4  254.43    9.77
  -1  -4  -3 1451.78   15.62
  -1  -4  -3 1483.03   17.53
  -1  -4  -3 1787.97   17.60
   1  -4   3 1653.27   18.57
  -1  -4  -2  182.11   10.50
   1  -4   2  196.45    8.30
  -1  -4  -2  177.01    9.89
  -1  -4  -1 2404.27   28.91
  -1  -4  -1 2529.96   24.71
   1  -4   1 2477.56   22.83
  -1  -4   0 3888.47   47.29
   1  -4   0 3572.70   33.45
  -1  -4   0 4215.85   35.84
   1  -4   0 4149.93   46.42
  -1  -3 -10   67.86   11.70
  -1  -3 -10   78.40   13.41
   1  -3  10  115.52   10.02
  -1  -3 -10   77.14   12.05
  -1  -3  -9   15.60    9.87
   1  -3   9   38.02    9.69
  -1  -3  -9   24.67    9.44
  -1  -3  -9   28.20    9.12
  -1  -3  -8  365.03   14.25
  -1  -3  -8  262.65   10.12
   1  -3   8  364.04   10.62
  -1  -3  -8  360.03   11.93
  -1  -3  -7   79.12    8.64
  -1  -3  -7   96.13    7.92
  -1  -3  -7   87.87    9.75
   1  -3   7   83.60   10.22
  -1  -3  -6 1212.98   15.28
   1  -3   6 1168.63   16.47
  -1  -3  -6 1105.19   16.72
  -1  -3  -6 1094.26   14.41
  -1  -3  -5   29.83    7.64
  -1  -3  -5   47.90    8.40
  -1  -3  -5   25.88    7.82
   1  -3   5   38.15    8.52
  -1  -3  -4  290.22    8.79
  -1  -3  -4  332.58    9.05
  -1  -3  -4  293.94   10.44
   1  -3   4  249.09    9.43
  -1  -3  -3  104.83    7.16
  -1  -3  -3  116.45    9.59
   1  -3   3  108.76   10.10
  -1  -3  -3  104.57    8.58
   1  -3   2  806.71   12.80
  -1  -3  -2  901.86   17.64
  -1  -3  -2  837.30   13.32
   1  -3   1  476.87   11.48
  -1  -3  -1  460.84   13.27
  -1  -3  -1  346.44   12.68
  -1  -3   0 1679.74   34.01
   1  -3   0 1749.89   28.83
   1  -3   0 1695.54   20.63
  -1  -3   0 1811.70   22.67
  -1  -2 -10   28.26   12.75
  -1  -2 -10   -1.39   11.46
  -1  -2 -10   28.39   10.63
   1  -2  10   31.38    9.29
  -1  -2  -9  248.69   11.68
  -1  -2  -9  252.66   11.12
   1  -2   9  288.07   10.92
  -1  -2  -9  188.82   11.15
  -1  -2  -8  126.48   11.62
   1  -2   8  117.24    8.80
  -1  -2  -8   88.82    9.90
  -1  -2  -8  112.07    9.60
  -1  -2  -7  773.86   12.59
  -1  -2  -7  710.74   12.91
  -1  -2  -7  787.66   13.23
   1  -2   7  773.92   13.02
  -1  -2  -6  194.99    9.14
  -1  -2  -6  190.63    8.43
  -1  -2  -6  201.26    9.81
   1  -2   6  181.26   10.21
  -1  -2  -5  995.34   13.69
  -1  -2  -5  891.26   15.35
  -1  -2  -5  839.83   12.84
   1  -2   5  909.74   13.09
  -1  -2  -4   39.85    7.62
   1  -2   4   41.83    8.28
  -1  -2  -4   38.95    7.51
  -1  -2  -4   54.66   12.30
  -1  -2  -3 1843.17   19.66
   1  -2   3 1734.56   18.44
  -1  -2  -3 1679.74   19.21
  -1  -2  -3 2101.59   21.24
  -1  -2  -2   93.92   11.07
  -1  -2  -2   86.65   13.54
   1  -2   2   97.09    8.42
  -1  -2  -1  228.47   12.28
   1  -2   1  222.14   15.43
  -1  -2  -1  250.37   10.51
   1  -2   1  220.78    8.86
   1  -2   0  324.33    9.15
  -1  -2   0  299.67   17.35
   1  -2   0  337.55   13.32
  -1  -2   0  343.23   11.47
   1  -1  10  245.00   10.51
  -1  -1 -10  261.83   13.40
  -1  -1 -10  315.62   11.06
  -1  -1 -10  233.95   14.73
  -1  -1  -9   33.71   10.16
  -1  -1  -9   19.85    9.13
   1  -1   9   20.48    9.30
  -1  -1  -9   16.75    9.79
  -1  -1  -8  276.21   10.27
  -1  -1  -8  247.07   11.08
  -1  -1  -8  290.73   10.96
   1  -1   8  300.25    9.81
  -1  -1  -7   93.37    9.23
  -1  -1  -7   70.13   11.90
  -1  -1  -7   73.97   11.14
   1  -1   7   80.08    9.07
   1  -1   6  591.69   12.06
  -1  -1  -6  606.75   11.79
  -1  -1  -6  558.50   11.72
  -1  -1  -6  542.09   11.50
  -1  -1  -5  156.60    9.63
  -1  -1  -5  192.63    8.55
  -1  -1  -5  174.90    8.33
   1  -1   5  164.21    9.03
   1  -1   4 1751.23   18.25
  -1  -1  -4 1806.77   19.77
  -1  -1  -4 1947.60   20.62
  -1  -1  -4 1668.53   17.98
   1  -1   3  514.39   11.48
  -1  -1  -3  553.52   11.45
  -1  -1  -3  489.25   11.94
  -1  -1  -3  474.39   11.25
  -1  -1  -2 5257.48   44.80
  -1  -1  -2 6143.48   52.73
  -1  -1  -2 5376.55   44.27
   1  -1   2 4800.81   38.83
  -1  -1  -1 1352.96   21.36
   1  -1   1 1305.38   19.00
  -1  -1  -1 1055.70   20.38
   1  -1   1 1347.76   27.41
  -1  -1   0 9691.97   91.76
   1  -1   0 9109.54   90.43
  -1  -1   0 8602.97   69.71
   1  -1   0 9888.04   81.80
  -1   0 -10   35.29    9.54
  -1   0 -10   41.85   12.00
  -1   0 -10   27.26   10.82
  -1   0  -9  469.62   11.62
  -1   0  -9  396.72   13.90
  -1   0  -9  330.91   12.35
  -1   0  -8  115.13   11.89
  -1   0  -8  125.24   12.53
  -1   0  -8  145.98    9.69
  -1   0  -7  458.38   12.27
  -1   0  -7  570.93   13.38
  -1   0  -7  575.84   11.52
  -1   0  -6   10.40    9.55
  -1   0  -6   23.35    7.62
  -1   0  -6    4.19   10.16
  -1   0  -5 1172.67   15.86
  -1   0  -5 1242.63   16.60
  -1   0  -5 1329.15   15.92
  -1   0  -4   45.46   10.67
  -1   0  -4   33.11    7.57
  -1   0  -4   38.69   13.00
  -1   0  -3 5470.18   46.84
  -1   0  -3 6260.84   53.69
  -1   0  -3 5983.27   43.02
  -1   0  -2  777.08   16.79
  -1   0  -2  833.29   15.43
  -1   0  -2  805.12   17.57
  -1   0  -1 1182.71   21.96
  -1   0  -1 1108.30   19.21
  -1   0   2 3415.33   35.86
  -1   0   2 3649.61   37.51
  -1   0   3 4363.01   37.41
  -1   0   3 4281.49   38.20
  -1   0   4    8.82    6.39
  -1   0   4   25.75    7.59
  -1   0   5 1198.61   15.49
  -1   0   5 1201.05   15.04
  -1   0   6  341.27   10.09
  -1   0   6  339.18    9.45
  -1   0   7  579.11   14.96
  -1   0   7  537.51   12.60
  -1   0   8  295.85    9.78
  -1   0   8  292.40   13.66
  -1   0   9   88.06   11.50
  -1   0  10   31.31    9.83
  -1   0  11   98.77   10.28
  -1   1   1   41.76    6.55
   1   1  -1   42.87    6.85
  -1   1   1   41.65    6.91
   1   1  -2 1346.40   23.01
  -1   1   2 1361.72   18.91
   1   1  -2 1296.11   19.26
  -1   1   2 1367.49   18.61
   1   1  -3 1268.47   20.56
  -1   1   3 1280.68   16.67
  -1   1   3 1289.26   16.44
   1   1  -3 1254.71   17.12
  -1   1   4 1816.12   19.02
   1   1  -4 1816.48   20.89
   1   1  -4 1774.21   20.47
  -1   1   4 1622.42   17.36
  -1   1   5  629.02   11.70
   1   1  -5  677.34   14.16
  -1   1   5  589.77   10.91
   1   1  -5  657.18   12.68
  -1   1   6 1614.53   18.09
   1   1  -6 1748.21   21.29
   1   1  -6 1724.40   18.47
  -1   1   6 1702.57   16.90
  -1   1   7  260.52   10.56
   1   1  -7  289.85   12.10
  -1   1   7  255.27    9.40
   1   1  -7  230.38   13.18
  -1   1   8  364.47   11.06
   1   1  -8  440.50   13.64
  -1   1   8  464.30   12.49
   1   1  -8  440.06   12.20
   1   1  -9   66.79    9.50
   1   1  -9   23.12    8.77
  -1   1   9   56.68   11.32
   1   1 -10  172.11   13.59
   1   1 -10  274.59   10.49
   1   1 -10  251.41   14.73
  -1   1  10  260.71   10.67
   1   1 -11   14.88    9.86
   1   1 -11   19.85    9.95
   1   1 -11   27.01   11.93
  -1   1  11   45.79    9.31
  -1   2   1 2618.33   31.02
   1   2  -1 2505.07   66.39
   1   2  -1 2610.83   30.59
  -1   2   1 2722.22   32.34
   1   2  -2 1060.25   17.56
  -1   2   2  892.56   14.10
  -1   2   2 1044.43   15.43
  -1   2   3 5610.19   43.45
  -1   2   3 5882.16   43.42
   1   2  -3 5662.31   51.43
   1   2  -3 5457.79   47.38
   1   2  -4   75.99    7.43
   1   2  -4   69.75    9.45
  -1   2   4   62.86    6.45
  -1   2   4   71.63    7.47
  -1   2   5 1429.52   15.67
   1   2  -5 1527.00   19.29
   1   2  -5 1215.17   16.68
  -1   2   5 1502.00   16.01
  -1   2   6   22.21    7.69
   1   2  -6   44.83    7.03
   1   2  -6   38.62    9.78
  -1   2   6   40.28    8.74
  -1   2   7 1399.80   16.67
   1   2  -7 1441.33   20.35
   1   2  -7 1246.62   16.00
  -1   2   7 1373.58   15.29
  -1   2   8   49.91    8.14
   1   2  -8   56.38    8.70
   1   2  -8   41.48    9.81
  -1   2   8   34.47    9.43
   1   2  -9  211.86    9.62
   1   2  -9  208.59   10.71
  -1   2   9  218.04   10.88
   1   2 -10   62.47   12.91
   1   2 -10   54.85   11.83
   1   2 -10   39.05   13.56
  -1   2  10   63.59   11.38
  -1   3   1  507.92   12.29
   1   3  -1  486.05   20.35
   1   3  -1  461.73   11.64
   1   3  -2 4605.17   44.06
  -1   3   2 4423.19   38.17
  -1   3   2 4387.72   37.64
   1   3  -3  100.71    7.22
   1   3  -3   82.41   12.32
  -1   3   3  103.95    6.76
  -1   3   3   99.54    7.22
   1   3  -4 4014.93   38.84
  -1   3   4 3656.47   28.08
   1   3  -4 3800.82   34.34
  -1   3   4 3813.32   27.85
  -1   3   5   19.19    8.80
  -1   3   5   18.09    7.89
   1   3  -5    8.20    6.94
   1   3  -5   34.62   13.25
  -1   3   6 1365.52   17.63
  -1   3   6 1204.60   14.60
   1   3  -6 1248.09   16.62
   1   3  -6 1315.84   18.65
  -1   3   7   13.43    7.48
   1   3  -7    0.18    9.34
   1   3  -7   17.78    8.13
  -1   3   7   25.68    8.58
  -1   3   8  615.43   12.43
   1   3  -8  692.66   15.28
   1   3  -8  698.23   16.73
  -1   3   9   37.33   10.00
   1   3  -9   18.75    9.60
   1   3  -9   -5.30   12.74
   1   3 -10  147.14   10.63
  -1   3  10  353.27   13.24
   1   3 -10  350.79   11.03
   1   3 -10  348.02   15.56
   1   4  -1 3939.49   53.89
   1   4  -1 3752.51   34.41
  -1   4   1 3817.89   38.07
  -1   4   2  410.56   10.03
   1   4  -2  369.43   10.48
  -1   4   2  446.89    9.96
   1   4  -2  425.45   13.18
  -1   4   3 1278.80   14.36
   1   4  -3 1494.36   20.45
  -1   4   3 1318.27   14.83
   1   4  -4  291.58   11.26
   1   4  -4  265.51   11.41
  -1   4   4  262.74    7.98
  -1   4   4  234.93    8.34
   1   4  -5 1749.84   21.88
  -1   4   5 1713.40   16.58
  -1   4   5 1559.19   15.65
   1   4  -5 1388.50   18.37
  -1   4   6  155.58   10.10
  -1   4   6  147.25    8.33
   1   4  -6  146.69   10.56
   1   4  -6  170.71    8.47
  -1   4   7 1074.87   13.52
  -1   4   7  953.26   13.21
   1   4  -7 1138.25   19.26
   1   4  -7 1211.72   21.09
  -1   4   8   10.48   10.07
   1   4  -8    8.93    9.85
   1   4  -8   20.84    9.74
   1   4  -9  294.86   11.32
  -1   4   9  307.69   11.04
   1   4  -9  330.47   16.11
  -1   4  10   38.40   10.31
   1   4 -10   12.12   16.17
   1   4 -10   70.27   14.02
  -1   5   1  219.81   10.49
   1   5  -1  196.42    8.56
  -1   5   2 3936.15   33.72
   1   5  -2 4306.78   39.36
   1   5  -2 3549.21   32.30
  -1   5   2 4042.74   34.89
  -1   5   3  249.72    7.75
   1   5  -3  241.12    9.48
  -1   5   3  227.06    7.91
  -1   5   4 3263.10   25.88
   1   5  -4 3123.60   34.43
   1   5  -4 2944.61   29.71
  -1   5   4 2819.56   22.20
   1   5  -5  124.66   10.79
  -1   5   5   80.70    7.15
   1   5  -5  129.18    9.79
  -1   5   5  122.06    8.02
   1   5  -6  447.99   12.40
   1   5  -6  452.95   14.43
  -1   5   6  399.73   12.67
  -1   5   6  424.86   11.45
   1   5  -7  201.07   10.93
   1   5  -7  221.21   13.43
  -1   5   7  173.15   12.08
   1   5  -8  275.50   10.93
   1   5  -8  305.81   13.95
  -1   5   8  249.14   11.31
   1   5  -9   72.32   16.94
   1   5  -9   59.08   10.46
  -1   5   9   45.93   10.30
   1   5 -10  222.76   20.42
   1   5 -10  116.63   12.88
  -1   5  10  158.88   11.15
   1   5 -10  148.03   11.13
   1   6  -1 3488.91   31.88
   1   6  -2  477.50   12.47
  -1   6   2  393.75    8.81
  -1   6   2  423.90   10.01
   1   6  -2  416.64   13.19
  -1   6   3 1895.76   18.55
  -1   6   3 1769.87   17.29
   1   6  -3 1749.77   21.82
  -1   6   4  717.07   11.25
   1   6  -4  711.90   14.13
   1   6  -4  729.89   13.55
  -1   6   4  706.54   10.75
   1   6  -5 1106.25   18.56
   1   6  -5 1011.46   15.66
  -1   6   5  960.89   12.02
  -1   6   5 1038.04   13.03
   1   6  -6  144.52   10.15
   1   6  -6  138.03   12.22
  -1   6   6  160.61   12.41
  -1   6   7  577.78   12.26
   1   6  -7  609.73   16.09
   1   6  -7  617.22   13.25
   1   6  -8  163.41   18.37
   1   6  -8  185.02   13.59
  -1   6   8  166.46   10.63
   1   6  -9  166.18   19.36
   1   6  -9  153.73   11.83
  -1   6   9  155.88   11.03
   1   6 -10   16.94   18.42
   1   6 -10   13.36   10.80
   1   6 -10   16.95   10.48
  -1   6  10    8.95   11.36
   1   7  -1  312.51   10.65
   1   7  -2 2147.77   23.45
  -1   7   2 1997.22   20.27
   1   7  -2 2293.48   25.54
  -1   7   3   81.87    6.96
   1   7  -3   88.75    7.37
   1   7  -3   72.52    8.12
  -1   7   4 1729.80   17.43
   1   7  -4 1769.27   23.85
   1   7  -5  165.13    9.14
  -1   7   5  158.20   11.13
   1   7  -5  147.47    8.82
   1   7  -6  715.57   16.15
   1   7  -6  788.68   16.41
  -1   7   6  814.69   13.09
   1   7  -7   94.72   13.58
   1   7  -7   99.67   10.27
  -1   7   7   91.18   10.82
   1   7  -8  360.79   21.02
  -1   7   8  315.09   13.51
   1   7  -8  328.22   12.09
   1   7  -9   27.45   15.01
   1   7  -9   10.13    9.49
   1   7  -9   38.50   11.03
  -1   7   9    9.59   13.58
  -1   7  10  175.68   12.21
   1   7 -10  168.33   22.92
   1   7 -10   82.70   12.08
   1   7 -10  159.96   12.51
   1   8  -1 1591.61   19.99
   1   8  -2  125.04    9.71
   1   8  -2  129.41   11.47
   1   8  -3 1180.66   17.86
   1   8  -3 1362.00   15.97
  -1   8   3 1347.08   15.61
  -1   8   4   42.66    7.14
   1   8  -4   45.59    9.38
  -1   8   5 1065.37   13.64
   1   8  -5 1214.37   17.77
   1   8  -5  748.76   15.79
  -1   8   6   69.08    9.55
   1   8  -6   74.09   11.79
   1   8  -6   69.27   11.41
   1   8  -7  544.93   15.14
   1   8  -7  403.57   14.74
  -1   8   7  611.21   13.25
   1   8  -8   47.00   14.41
   1   8  -8   55.93   10.38
  -1   8   8   90.60   10.29
   1   8  -9  352.18   22.02
   1   8  -9  430.97   14.06
   1   8  -9  187.82   13.72
  -1   8   9  415.20   13.57
   1   8 -10   11.07   14.84
   1   8 -10   -5.08   14.79
   1   8 -10   10.81   17.20
  -1   8  10   35.11   11.73
   1   9  -1   14.27    7.90
   1   9  -2 1550.27   19.78
   1   9  -2 1453.38   20.36
   1   9  -3   14.67    5.82
  -1   9   3   18.55    6.64
   1   9  -3   18.33    7.53
  -1   9   4  788.75   11.71
   1   9  -4  950.45   14.33
   1   9  -4  839.12   18.20
  -1   9   5  233.96    8.69
   1   9  -5  206.72   14.29
  -1   9   6  687.77   12.57
   1   9  -6  712.67   15.18
   1   9  -6  411.96   16.67
  -1   9   7   36.05    9.84
   1   9  -7   31.40    9.55
   1   9  -7   32.75   13.01
   1   9  -8  376.52   21.55
   1   9  -8  627.96   17.63
  -1   9   8  641.28   13.34
  -1   9   9   16.91   11.91
   1   9  -9   20.78   11.92
   1   9  -9    7.03   13.57
   1   9  -9    7.39   10.98
   1   9  -9   -5.14    7.88
   1  10  -1 1121.28   15.36
   1  10  -2   47.23    8.11
   1  10  -3 1730.84   18.87
  -1  10   3 1631.66   19.56
   1  10  -3 1390.96   19.88
   1  10  -4   34.29    9.80
   1  10  -4   42.78    6.97
  -1  10   4   22.93   10.11
   1  10  -5  410.54   18.38
  -1  10   5  475.37   10.05
  -1  10   6   -1.81    9.02
   1  10  -6   23.58   15.93
   1  10  -6   15.06    8.06
  -1  10   7  349.84   11.12
   1  10  -7  387.95   11.80
   1  10  -7  196.54   19.58
  -1  10   8   55.89   10.15
   1  10  -8   36.28   10.49
  -1  10   9  223.38   12.38
   1  10  -9  229.99   12.86
   1  11  -2 1081.62   16.43
   1  11  -3    1.47    8.99
   1  11  -3   22.91    6.71
   1  11  -4  843.99   12.70
   1  11  -4  805.98   19.63
  -1  11   4  743.45   12.35
   1  11  -5   68.94   14.30
  -1  11   5   92.73    7.48
   1  11  -5   76.81    7.16
   1  11  -6  276.93   24.76
  -1  11   6  456.74   11.52
  -1  11   7   47.16    9.20
   1  11  -7   46.49    9.10
  -1  11   8  243.36   11.45
   1  11  -8  237.34   14.71
  -1  11   9   34.56   11.87
   1  11  -9   32.03   12.21
  -1  12   4   76.33    6.39
   1  12  -4   71.69    7.43
   1  12  -5  682.50   12.11
  -1  12   5  679.96   12.31
  -1  12   6   24.34    8.54
  -1  12   7  244.72   12.41
  -1  12   8   47.09   11.44
   1  12  -8   72.71   12.77
   1  13  -4  732.68   12.67
   1  13  -5   54.90    7.52
  -1  13   5   64.34    9.63
   1  13  -6  406.81   12.69
  -1  13   6  507.87   13.68
  -1  13   7   -2.08   10.28
  -1  13   8  121.22   11.28
   1  14  -5  401.78   12.40
   1  14  -6   42.68    7.83
  -1  14   6   41.03    9.43
   1  14  -7  297.07   11.57
  -1  14   7  306.30   11.38
   1  15  -5   21.11    8.12
   1  15  -6  164.18    9.53
   1  15  -7   20.40    8.93
  -1  15   7   48.91   12.31
   1  16  -6   11.29   10.18
   0 -19   1  110.50   12.10
   0 -19   1  126.23   12.89
   0 -19  -1  160.69   14.83
   0 -19   1  115.03   13.37
   0 -19  -1   75.76   12.06
   0 -19  -1   86.96   12.72
   0 -19   1   93.08   11.29
   0 -19  -1   79.43   10.56
   0 -19   0    5.94   13.14
   0 -19   0    5.75    8.85
   0 -19   0   11.10   10.06
   0 -19   0    5.46   10.13
   0 -18   3    5.58   11.69
   0 -18  -3   42.63    9.93
   0 -18   3    7.17   12.16
   0 -18  -3   16.63   13.60
   0 -18  -3   38.47   13.28
   0 -18   3   21.17   10.83
   0 -18   3   10.99    8.72
   0 -18  -3   40.14   10.48
   0 -18   2  165.33   11.47
   0 -18   2  111.54    9.48
   0 -18  -2  197.53   12.48
   0 -18   2  136.89   13.10
   0 -18  -2  138.99   12.01
   0 -18   2  142.20   12.13
   0 -18  -2  218.30   12.63
   0 -18  -2  169.52   12.54
   0 -18  -1   10.51    9.99
   0 -18   1   19.47   10.22
   0 -18  -1   29.61   15.57
   0 -18  -1   23.60   10.22
   0 -18   1   14.56   12.24
   0 -18   1   33.71   14.35
   0 -18  -1   13.35   10.49
   0 -18   1   25.62   10.08
   0 -18   0  160.08   14.67
   0 -18   0  252.49   13.10
   0 -18   0  160.60   13.02
   0 -18   0  189.55   10.40
   0 -17  -4   18.36    9.40
   0 -17  -4   23.60   12.33
   0 -17   4   12.90    9.47
   0 -17  -4   16.86    9.75
   0 -17   4   36.98   12.66
   0 -17  -4   25.52   10.18
   0 -17   3  193.21   12.15
   0 -17  -3  315.98   13.05
   0 -17  -3  170.53   13.85
   0 -17  -3  200.47   12.74
   0 -17  -3  212.33   11.69
   0 -17   3  230.79   12.50
   0 -17   2   20.33   10.46
   0 -17  -2   40.93    9.70
   0 -17   2   16.49    9.78
   0 -17  -2   32.94    9.91
   0 -17  -2   24.90    9.91
   0 -17  -2   31.37   10.09
   0 -17   2   20.34   10.12
   0 -17   2   34.81   11.96
   0 -17  -1  252.45   10.76
   0 -17   1  160.04   12.39
   0 -17  -1  335.55   14.12
   0 -17   1  240.71   11.80
   0 -17  -1  196.34   11.24
   0 -17   1  318.38   12.58
   0 -17   1  239.96   11.78
   0 -17  -1  205.08   13.45
   0 -17   0    2.44   10.14
   0 -17   0    9.15   10.89
   0 -17   0   25.97   10.62
   0 -17   0   18.89   10.43
   0 -16  -5   46.68   10.04
   0 -16  -5   13.44   10.60
   0 -16  -5   26.37   10.19
   0 -16   5   33.54   11.74
   0 -16  -5   30.63   10.63
   0 -16   4  210.22   11.25
   0 -16  -4  406.73   12.65
   0 -16  -4  288.27   13.76
   0 -16  -4  284.69   11.82
   0 -16  -4  277.73   12.18
   0 -16   4  325.37   13.21
   0 -16   3   23.80   10.70
   0 -16   3   12.04    8.73
   0 -16  -3   44.05    9.88
   0 -16  -3   27.65   10.50
   0 -16  -3   41.47   10.24
   0 -16   3   33.35   10.84
   0 -16  -3   30.79    9.71
   0 -16   3   31.73   11.33
   0 -16  -2  238.37   10.03
   0 -16  -2  174.50   14.19
   0 -16  -2  183.01   11.33
   0 -16   2  193.18   10.61
   0 -16   2  215.41   10.66
   0 -16   2  211.74   11.95
   0 -16   2  265.76   15.48
   0 -16  -2  249.14   10.39
   0 -16  -1   20.11   10.46
   0 -16   1   17.69   11.34
   0 -16  -1   42.53    9.02
   0 -16   1   23.14   11.82
   0 -16  -1   30.58    8.79
   0 -16   1   59.69   12.12
   0 -16  -1   19.80    9.46
   0 -16   1   15.12   10.49
   0 -16   0  330.01   11.57
   0 -16   0  510.87   17.50
   0 -16   0  340.03   13.56
   0 -16   0  311.43   10.78
   0 -15  -6   37.08    9.22
   0 -15  -6   12.58    9.23
   0 -15  -6   29.56   11.38
   0 -15   6   29.17   12.51
   0 -15  -5  122.24   10.16
   0 -15   5  196.63   12.93
   0 -15  -5  150.35   10.14
   0 -15  -5  119.20   10.61
   0 -15  -4   31.85    8.81
   0 -15  -4   38.04    7.81
   0 -15  -4   30.57    9.38
   0 -15   4   46.46   10.53
   0 -15  -4   33.69   13.66
   0 -15   3  378.91   14.92
   0 -15  -3  494.61   12.98
   0 -15  -3  398.05   12.22
   0 -15   3  429.14   11.15
   0 -15   3  514.75   13.46
   0 -15   3  409.18   17.41
   0 -15  -3  377.15   14.55
   0 -15  -3  468.60   11.42
   0 -15   2   11.26    7.73
   0 -15  -2   23.07    7.56
   0 -15  -2   26.62    9.30
   0 -15  -2   26.02    8.97
   0 -15  -2   16.14    6.59
   0 -15   2   17.02   11.52
   0 -15   2   12.82    8.59
   0 -15   2   19.17   10.34
   0 -15   1  476.12   13.31
   0 -15  -1  600.65   12.97
   0 -15   1  604.66   15.31
   0 -15  -1  460.17   13.96
   0 -15   1  485.79   13.71
   0 -15  -1  438.06   12.24
   0 -15  -1  510.39   12.59
   0 -15   1  478.01   13.09
   0 -15   0   -2.24    7.44
   0 -15   0    5.04    8.53
   0 -15   0   -0.54    8.63
   0 -15   0   31.11   11.09
   0 -14  -7   23.33    9.77
   0 -14  -7   34.97   10.90
   0 -14   7   19.64   13.62
   0 -14  -7   19.18    9.40
   0 -14   6  367.56   17.78
   0 -14  -6  273.98   11.81
   0 -14  -6  328.16   12.91
   0 -14  -6  231.32   13.49
   0 -14  -5   32.51    8.71
   0 -14  -5    8.98   11.14
   0 -14   5   47.51   10.72
   0 -14  -5   32.47    9.60
   0 -14  -4  568.59   12.19
   0 -14  -4  374.69   11.10
   0 -14  -4  536.74   12.64
   0 -14   4  644.29   16.52
   0 -14  -3   73.89    8.65
   0 -14   3   49.91   10.06
   0 -14  -3   51.54    9.71
   0 -14  -3   46.51   10.19
   0 -14   3   62.23   11.55
   0 -14   3   75.51   10.70
   0 -14  -3   39.41    8.28
   0 -14  -2  449.82   12.05
   0 -14  -2  461.28   11.27
   0 -14   2  456.36   13.07
   0 -14  -2  445.30   11.32
   0 -14   2  401.44   11.57
   0 -14  -2  391.38   11.43
   0 -14   2  434.79   15.65
   0 -14   2  467.91   11.71
   0 -14   1   -1.24    7.26
   0 -14  -1    5.56   11.95
   0 -14  -1    4.15    6.83
   0 -14   1    6.06    8.19
   0 -14   1    9.36    7.65
   0 -14  -1    0.24   10.98
   0 -14  -1    9.43    7.15
   0 -14   1   -4.52    8.69
   0 -14   0  581.19   14.49
   0 -14   0  462.28   11.71
   0 -14   0  447.50   11.83
   0 -14   0  358.79   10.05
   0 -13  -7  264.36   11.90
   0 -13   7  305.82   15.53
   0 -13  -7  333.42   12.40
   0 -13  -7  197.02   10.79
   0 -13  -6   52.50   10.05
   0 -13   6   54.84   11.24
   0 -13  -6   46.01   11.98
   0 -13  -6   43.40   11.42
   0 -13  -5  331.84   10.82
   0 -13  -5  230.59   10.44
   0 -13   5  287.94   13.66
   0 -13  -5  104.27    9.51
   0 -13  -4   21.92    9.44
   0 -13  -4   70.28   11.54
   0 -13   4   43.55   11.76
   0 -13  -4   53.68    8.47
   0 -13   3  442.88   13.90
   0 -13  -3  458.84   12.07
   0 -13  -3  466.07   11.82
   0 -13   3  520.94   16.95
   0 -13   3  540.20   12.05
   0 -13  -3  515.02   11.21
   0 -13   2   13.69    6.84
   0 -13  -2   -0.42    6.31
   0 -13   2   10.77    8.75
   0 -13   2   15.42    7.41
   0 -13  -2    4.20    8.00
   0 -13   2   13.94   10.24
   0 -13  -2    7.02    8.37
   0 -13  -2   -9.07    9.27
   0 -13   1  898.52   13.76
   0 -13  -1 1119.76   18.51
   0 -13   1  961.88   16.49
   0 -13   1 1186.96   17.00
   0 -13  -1  937.02   15.32
   0 -13  -1  984.30   13.99
   0 -13   1  936.27   15.34
   0 -13  -1  974.30   16.02
   0 -13   0   10.65    7.99
   0 -13   0    2.54    9.10
   0 -13   0   -5.03    7.65
   0 -13   0    5.92    8.74
   0 -12   8  183.19   13.18
   0 -12  -8  189.97   11.16
   0 -12  -8  153.76   11.17
   0 -12  -8  161.80   10.32
   0 -12   7   -0.72   11.26
   0 -12  -7    1.68   11.44
   0 -12  -7   32.01   10.05
   0 -12  -7   24.80    8.63
   0 -12  -6  273.32   11.24
   0 -12   6  263.53   11.86
   0 -12  -6  301.70   13.09
   0 -12  -6  250.56   14.14
   0 -12  -5   13.98    9.04
   0 -12  -5   53.92   10.16
   0 -12  -5   48.08   10.91
   0 -12   5    6.74   12.51
   0 -12  -4  524.75   11.76
   0 -12   4  634.55   13.48
   0 -12  -4  663.60   11.77
   0 -12  -4  486.87   12.15
   0 -12  -3   14.01    8.24
   0 -12  -3   23.29    7.81
   0 -12  -3   22.04    8.37
   0 -12   3   45.85    8.36
   0 -12   3   24.08    9.28
   0 -12   3   28.49   10.86
   0 -12  -2 1081.48   16.04
   0 -12   2  207.65    8.37
   0 -12  -2 1119.53   17.86
   0 -12   2  999.12   15.57
   0 -12  -2 1092.97   14.80
   0 -12   2 1075.48   14.67
   0 -12   2 1121.29   18.98
   0 -12  -2 1158.54   17.64
   0 -12   1  116.29    7.82
   0 -12  -1  118.97    7.20
   0 -12   1  149.03   11.82
   0 -12  -1  100.88    8.88
   0 -12  -1  105.55   12.01
   0 -12   1  154.13   10.34
   0 -12   1  122.60    8.09
   0 -12  -1  127.37    9.58
   0 -12   0  992.84   14.12
   0 -12   0 1021.81   15.59
   0 -12   0  921.93   14.43
   0 -12   0  901.94   15.77
   0 -11  -8   21.76   11.32
   0 -11   8   14.38   11.24
   0 -11  -8   32.82    9.99
   0 -11  -8   28.71   10.26
   0 -11  -7  259.56   10.69
   0 -11  -7  279.01   10.97
   0 -11   7  310.09   12.39
   0 -11  -7  185.34    9.84
   0 -11  -6   10.85    8.92
   0 -11   6   -7.22   10.16
   0 -11  -6   31.56   13.17
   0 -11  -6    9.72   11.66
   0 -11  -5  360.90   10.82
   0 -11   5  351.03   11.97
   0 -11  -5  384.41   10.05
   0 -11  -5  296.52   12.01
   0 -11  -4   44.26   11.64
   0 -11  -4   46.88    7.64
   0 -11   4   77.30   11.48
   0 -11  -4   46.57    8.93
   0 -11   3  948.33   18.05
   0 -11   3 1089.70   15.09
   0 -11   3 1058.62   22.01
   0 -11  -3  962.65   14.44
   0 -11  -3  942.45   15.30
   0 -11  -3  936.67   13.79
   0 -11  -2   18.14    5.68
   0 -11   2    7.60    8.24
   0 -11   2   12.80    6.59
   0 -11  -2   18.00    8.58
   0 -11  -2   20.65    7.73
   0 -11  -2   33.88    8.97
   0 -11   2   34.97    9.77
   0 -11   1 1255.47   15.68
   0 -11  -1 1264.85   18.06
   0 -11  -1 1270.69   16.19
   0 -11   1 1359.08   18.44
   0 -11   1 1550.72   18.99
   0 -11  -1 1325.95   17.47
   0 -11   1 1284.67   17.63
   0 -11  -1 1311.03   18.20
   0 -11   0    2.77    9.94
   0 -11   0   -3.17   10.66
   0 -11   0    5.60    7.83
   0 -11   0    1.88    5.90
   0 -10  -9   -4.05    9.41
   0 -10  -9   22.68   10.29
   0 -10   9   30.08   10.82
   0 -10  -9   36.91   11.34
   0 -10  -8   90.17    9.71
   0 -10  -8  192.91   10.08
   0 -10   8  193.58   11.87
   0 -10  -8  181.40   10.95
   0 -10  -7   38.47    9.20
   0 -10  -7   40.04    8.67
   0 -10  -7   33.22    8.31
   0 -10   7   20.45   14.96
   0 -10   6  339.77   15.02
   0 -10  -6  337.51   14.62
   0 -10  -6  231.22   10.21
   0 -10  -6  197.15   11.68
   0 -10  -5   10.42    8.68
   0 -10  -5   31.72    8.54
   0 -10   5   29.32    9.77
   0 -10  -5    0.08    7.87
   0 -10  -4  400.72   10.58
   0 -10  -4  427.78   10.72
   0 -10   4  412.27   11.55
   0 -10  -4  166.03    9.41
   0 -10   3   82.76    7.50
   0 -10   3   79.77   11.43
   0 -10  -3   85.95    8.48
   0 -10  -3   60.34    9.75
   0 -10   3   74.12   10.18
   0 -10  -3   75.95    8.44
   0 -10   2 1645.09   18.02
   0 -10   2 1533.98   21.36
   0 -10  -2 1554.75   16.96
   0 -10  -2 1412.29   16.20
   0 -10  -2 1460.15   16.96
   0 -10   2 1348.88   16.97
   0 -10   1    9.98    6.00
   0 -10  -1    4.88    5.69
   0 -10  -1   -7.33    7.71
   0 -10   1    1.67    6.57
   0 -10  -1    0.14    7.70
   0 -10   1   10.81    9.62
   0 -10   1    1.98    6.20
   0 -10  -1   -6.13    6.10
   0 -10   0 1557.87   18.00
   0 -10   0 1790.51   21.08
   0 -10   0 1573.72   18.91
   0 -10   0 1694.96   20.41
   0  -9   9  164.51   12.41
   0  -9  -9  155.85   12.60
   0  -9  -9   95.88    9.78
   0  -9  -9  109.51    9.59
   0  -9  -8   14.30   12.13
   0  -9  -8   41.68    9.48
   0  -9   8   43.02   13.11
   0  -9  -8   40.09    9.10
   0  -9  -7  259.65   10.19
   0  -9   7  331.40   12.06
   0  -9  -7  344.01   10.68
   0  -9  -7  352.07   10.59
   0  -9  -6   21.93   10.20
   0  -9   6   31.00   10.13
   0  -9  -6   51.13    8.73
   0  -9  -6   26.77   11.25
   0  -9  -5  960.73   12.93
   0  -9  -5  810.82   11.79
   0  -9   5 1092.27   17.59
   0  -9  -5 1000.28   13.84
   0  -9  -4   36.95   10.29
   0  -9  -4   51.96    8.87
   0  -9   4   43.33    8.18
   0  -9  -4   37.75    7.46
   0  -9  -3  764.88   11.81
   0  -9   3  749.01   16.56
   0  -9   3  911.24   22.49
   0  -9   3  823.14   13.04
   0  -9  -3  857.70   12.26
   0  -9  -3  578.77   10.56
   0  -9   2   57.83    6.38
   0  -9  -2   75.81   11.60
   0  -9   2   69.48    7.30
   0  -9   2   92.60   11.39
   0  -9  -2   74.44    6.75
   0  -9  -2   94.53   11.36
   0  -9  -1  987.28   14.81
   0  -9   1  974.36   16.16
   0  -9  -1  947.35   13.88
   0  -9  -1  909.98   13.84
   0  -9  -1  907.54   14.14
   0  -9   1  880.77   12.75
   0  -9   1  849.08   13.81
   0  -9   0   -4.52    6.29
   0  -9   0   -5.41    6.11
   0  -9   0   -6.01    8.10
   0  -9   0   -1.42    7.48
   0  -8  -9   25.78   10.08
   0  -8   9   28.71   10.86
   0  -8  -9    2.93    8.98
   0  -8  -9   33.92    9.03
   0  -8  -8  246.88   10.66
   0  -8  -8  361.30   10.80
   0  -8   8  393.81   12.34
   0  -8  -8  398.45   11.30
   0  -8  -7  -23.33    7.67
   0  -8  -7   -2.14    8.40
   0  -8  -7   12.08    8.75
   0  -8   7   16.70    9.41
   0  -8  -6  518.18   10.67
   0  -8  -6  903.31   14.29
   0  -8   6  839.95   14.26
   0  -8  -6  808.93   13.12
   0  -8  -5   17.86    7.99
   0  -8   5   11.62    8.89
   0  -8  -5   -7.32    7.39
   0  -8  -5   10.84    8.15
   0  -8  -4  840.65   12.15
   0  -8   4  993.54   31.03
   0  -8  -4 1045.99   13.52
   0  -8   4 1025.01   14.69
   0  -8  -4  731.87   11.77
   0  -8  -3   21.47    6.93
   0  -8   3   36.51   10.27
   0  -8   3   40.90    8.32
   0  -8  -3   50.28    7.63
   0  -8  -3   37.58    7.03
   0  -8  -2  826.37   12.35
   0  -8   2  942.08   13.41
   0  -8   2  766.84   13.63
   0  -8  -2  843.39   12.48
   0  -8  -2  943.72   13.11
   0  -8  -1   63.16    6.53
   0  -8  -1   57.70    6.63
   0  -8   1   70.99    9.37
   0  -8   1   61.25    8.26
   0  -8   1   51.13    7.11
   0  -8  -1   48.29    7.71
   0  -8  -1   73.01    8.04
   0  -8   0 2463.01   25.02
   0  -8   0 2603.06   28.19
   0  -8   0 2349.32   24.14
   0  -8   0 2166.99   23.03
   0  -7   9  355.22   14.89
   0  -7  -9  286.02   10.51
   0  -7  -9  302.32   11.04
   0  -7  -9  188.33   12.17
   0  -7  -8   37.16   10.49
   0  -7  -8   35.31    8.92
   0  -7  -8    7.87   10.59
   0  -7   8   43.99   10.53
   0  -7  -7  457.57   12.44
   0  -7  -7  546.75   11.91
   0  -7  -7  496.17   14.21
   0  -7   7  575.51   12.58
   0  -7   6   41.19   10.10
   0  -7  -6   50.34   10.48
   0  -7  -6   55.84    7.63
   0  -7  -6   33.39    9.20
   0  -7  -5 1043.83   13.04
   0  -7  -5 1233.75   14.52
   0  -7   5 1308.53   27.88
   0  -7   5 1263.57   16.03
   0  -7  -5 1252.41   15.05
   0  -7  -4  103.02    7.88
   0  -7   4  105.50   11.81
   0  -7  -4   92.59    7.11
   0  -7   4   92.19    9.05
   0  -7  -4  115.35    8.18
   0  -7   3 1716.05   28.58
   0  -7  -3 1505.92   16.52
   0  -7   3 1548.50   17.71
   0  -7  -3 1764.40   17.04
   0  -7  -3 1699.15   18.98
   0  -7  -2   44.09    6.87
   0  -7  -2   39.78    6.55
   0  -7   2   42.54    8.23
   0  -7  -2   40.04    7.53
   0  -7   2   48.46    7.40
   0  -7  -1 2602.38   24.38
   0  -7   1 2547.09   23.50
   0  -7  -1 2968.82   27.62
   0  -7   1 2312.63   25.21
   0  -7  -1 2612.79   26.76
   0  -7   0    6.03    7.64
   0  -7   0   -0.08    5.57
   0  -7   0   -2.68    7.61
   0  -7   0    3.18    8.05
   0  -6 -10  128.32   10.30
   0  -6 -10  166.53   11.02
   0  -6  10  183.95   10.86
   0  -6 -10  113.00   13.04
   0  -6  -9   21.11    8.81
   0  -6   9   20.39   10.65
   0  -6  -9   19.14    8.72
   0  -6  -9   21.88    9.40
   0  -6  -8  246.45   10.00
   0  -6  -8  205.25    9.40
   0  -6  -8  208.61    9.41
   0  -6   8  268.42   11.23
   0  -6  -7   46.97    9.33
   0  -6  -7   24.92    8.56
   0  -6  -7  -12.07    8.90
   0  -6   7  -21.89   11.55
   0  -6  -6  905.77   12.41
   0  -6  -6 1004.95   13.47
   0  -6  -6 1059.09   16.51
   0  -6   6 1056.14   15.37
   0  -6  -5   32.76    8.30
   0  -6   5   10.70    9.89
   0  -6   5    4.97    8.95
   0  -6  -5   15.53    8.41
   0  -6  -5   19.35    7.58
   0  -6  -4 1612.55   15.58
   0  -6  -4 1270.56   13.44
   0  -6   4 1535.61   17.78
   0  -6  -4 1564.46   16.59
   0  -6   4 1676.78   28.93
   0  -6  -3  352.21    9.18
   0  -6   3  358.45   14.33
   0  -6  -3  281.47    8.23
   0  -6   3  338.28   10.40
   0  -6  -3  342.02    9.20
   0  -6  -2 4180.74   31.84
   0  -6  -2 5190.49   38.67
   0  -6   2 4687.68   47.38
   0  -6   2 5119.39   38.32
   0  -6  -2 4443.25   38.02
   0  -6   1  314.83    8.97
   0  -6  -1  356.90   10.38
   0  -6   1  326.02   10.61
   0  -6  -1  304.23    9.82
   0  -6  -1  319.76    9.10
   0  -6   0 3935.23   36.15
   0  -6   0 3971.77   39.42
   0  -6   0 4129.62   38.17
   0  -6   0 3728.76   36.71
   0  -5 -10   18.84    8.96
   0  -5  10    6.08   11.77
   0  -5 -10   11.70    9.72
   0  -5 -10   28.31    9.44
   0  -5  -9  289.47   12.97
   0  -5  -9  345.92   11.04
   0  -5  -9  341.57   14.38
   0  -5   9  391.13   14.02
   0  -5  -8   26.20    8.95
   0  -5  -8   52.55   11.18
   0  -5   8   35.82   11.70
   0  -5  -8   30.89    8.98
   0  -5  -7  291.74    9.62
   0  -5  -7  329.47   12.20
   0  -5  -7  314.76    9.99
   0  -5   7  316.26   10.27
   0  -5  -6   50.17    8.54
   0  -5  -6   77.88    8.92
   0  -5  -6   56.48    7.92
   0  -5   6   54.72    9.02
   0  -5   6   47.62    9.55
   0  -5  -5  713.79   10.47
   0  -5  -5  858.27   11.69
   0  -5   5  903.15   17.69
   0  -5   5  859.41   13.84
   0  -5  -5  849.71   12.33
   0  -5  -4  102.09    7.68
   0  -5   4  114.17   12.75
   0  -5  -4   89.39    8.10
   0  -5   4   95.52    8.66
   0  -5  -4   65.44    6.92
   0  -5  -3 2238.77   19.49
   0  -5   3 2699.95   25.34
   0  -5  -3 2815.21   22.98
   0  -5  -3 2820.08   25.19
   0  -5   3 2960.61   40.09
   0  -5   2  165.52    9.57
   0  -5  -2  199.19   10.58
   0  -5  -2  148.86    7.47
   0  -5   2  188.25   10.58
   0  -5  -2  180.18    9.59
   0  -5  -1 6444.84   50.47
   0  -5   1 7407.79   56.26
   0  -5  -1 7263.80   56.84
   0  -5   1 6206.34   54.97
   0  -5  -1 6111.94   55.17
   0  -5   0   -0.54    5.10
   0  -5   0    5.78    4.93
   0  -5   0   -2.35    6.56
   0  -4 -10  112.75    9.79
   0  -4 -10  172.15   10.53
   0  -4 -10  166.21   10.42
   0  -4  10  178.43   11.31
   0  -4  -9   36.33    9.55
   0  -4  -9   52.07    9.85
   0  -4  -9   61.51    9.59
   0  -4   9   40.87    9.75
   0  -4  -8  103.63    9.37
   0  -4  -8  210.32   10.27
   0  -4  -8  241.62    9.94
   0  -4   8  259.41   10.67
   0  -4   7   -4.91    9.05
   0  -4  -7   36.87    7.69
   0  -4  -7   16.47   10.85
   0  -4  -7    6.94    8.06
   0  -4  -6  693.36   11.47
   0  -4   6  793.39   13.30
   0  -4  -6  847.14   12.44
   0  -4   6  909.69   18.10
   0  -4  -6  758.25   12.83
   0  -4  -5   -5.62    7.14
   0  -4   5    3.91    8.95
   0  -4  -5   12.93    7.49
   0  -4   5    6.76    9.09
   0  -4  -4 2101.10   18.61
   0  -4   4 2058.34   21.04
   0  -4  -4 1976.58   18.77
   0  -4   4 2026.22   26.43
   0  -4  -3  358.88    9.60
   0  -4   3  379.25   12.86
   0  -4  -3  343.38    8.74
   0  -4   3  355.37   11.22
   0  -4  -2 2223.44   22.30
   0  -4   2 2165.00   23.63
   0  -4   2 2243.81   34.68
   0  -4  -2 2213.59   23.06
   0  -4  -1 1950.33   23.80
   0  -4   1 1829.41   22.31
   0  -4   1 1521.77   24.36
   0  -4  -1 1691.10   21.49
   0  -4  -1 1706.81   21.78
   0  -4   0 1213.76   19.32
   0  -4   0 1260.31   19.11
   0  -4   0 1261.61   20.96
   0  -3 -10   18.91    9.69
   0  -3 -10   20.75    9.72
   0  -3 -10   21.43    9.75
   0  -3  10    2.15   10.03
   0  -3  -9  237.06   11.16
   0  -3  -9  190.52   10.49
   0  -3  -9  236.74   10.29
   0  -3   9  245.39   10.24
   0  -3  -8   67.84    9.30
   0  -3  -8   42.29    8.93
   0  -3   8   39.27    9.73
   0  -3  -8   60.64    9.54
   0  -3  -7  440.75   10.45
   0  -3  -7  573.30   11.50
   0  -3  -7  540.90   13.16
   0  -3   7  575.79   12.28
   0  -3   6   51.89    9.27
   0  -3   6   61.94   10.29
   0  -3  -6   72.21   13.08
   0  -3  -6   32.13    8.16
   0  -3   5 1333.63   16.26
   0  -3  -5 1481.95   15.72
   0  -3   5 1548.40   20.52
   0  -3  -5 1299.86   15.02
   0  -3  -4  197.96    9.94
   0  -3   4  202.91   10.80
   0  -3   4  171.88    9.26
   0  -3  -4  181.55    8.66
   0  -3  -3 2419.98   22.13
   0  -3   3 2762.89   34.45
   0  -3   3 2313.44   24.44
   0  -3  -3 2438.46   22.87
   0  -3   2  132.49   10.93
   0  -3  -2  117.82    8.22
   0  -3   2  128.76   10.80
   0  -3  -2  125.80    7.49
   0  -3  -1  110.46    7.74
   0  -3  -1  127.26    7.99
   0  -3   1  116.51    8.27
   0  -3   1  107.71    8.87
   0  -3  -1  132.28    8.58
   0  -3   0    2.83    7.53
   0  -3   0    2.79    5.48
   0  -3   0   -0.65    7.40
   0  -2  10  254.53   10.90
   0  -2 -10  211.33   12.63
   0  -2 -10  243.25   10.82
   0  -2 -10  200.56   12.50
   0  -2  -9   27.37   10.01
   0  -2  -9   20.32    9.59
   0  -2   9   36.54    8.74
   0  -2  -9   16.15   11.71
   0  -2  -8  476.80   11.77
   0  -2   8  477.04   11.40
   0  -2  -8  397.33   11.36
   0  -2  -8  367.13   10.81
   0  -2  -7   24.00    8.22
   0  -2   7   14.36    9.37
   0  -2  -7   37.45    8.25
   0  -2  -7   28.25    7.86
   0  -2   6 1010.68   15.45
   0  -2  -6 1002.04   14.03
   0  -2  -6 1059.64   14.38
   0  -2   6  956.59   14.03
   0  -2  -5   10.51    7.19
   0  -2   5   24.54    7.65
   0  -2  -5    2.88    8.14
   0  -2   5   13.63    8.44
   0  -2   4 1698.47   22.27
   0  -2   4 1462.89   17.55
   0  -2  -4 1517.06   16.48
   0  -2  -4 1539.00   16.97
   0  -2  -3  165.21    7.94
   0  -2   3  172.54    9.13
   0  -2   3  173.00   10.23
   0  -2  -3  168.00    9.49
   0  -2   2 1183.01   22.75
   0  -2   2 1104.40   20.29
   0  -2  -2 1063.15   15.57
   0  -2  -2 1144.87   17.32
   0  -2  -1  205.66    9.89
   0  -2   1  189.26   12.91
   0  -2   1  208.80   12.87
   0  -2  -1  199.18    9.75
   0  -2   0 7232.48   77.12
   0  -2   0 6239.41   72.18
   0  -1 -10   29.05   10.31
   0  -1 -10   40.91   11.19
   0  -1 -10   30.20    9.78
   0  -1  10   27.91    9.46
   0  -1  -9  238.35   10.83
   0  -1  -9  269.00   11.94
   0  -1  -9  303.19   11.30
   0  -1   9  285.88   13.82
   0  -1  -8   19.90   10.54
   0  -1  -8   37.54    9.05
   0  -1  -8    3.52   13.34
   0  -1   8   22.99    9.20
   0  -1  -7  578.19   11.85
   0  -1  -7  801.18   12.76
   0  -1   7  749.01   12.53
   0  -1  -7  804.34   14.58
   0  -1  -6   -1.86    7.83
   0  -1  -6   10.70    9.22
   0  -1   6    1.92    7.41
   0  -1   6  -19.16    8.99
   0  -1   5 1605.63   19.99
   0  -1  -5 1340.20   15.52
   0  -1  -5 1649.16   18.46
   0  -1   5 1529.57   16.90
   0  -1   4  163.89    8.73
   0  -1  -4  167.81    7.67
   0  -1  -4  157.27    9.26
   0  -1   4  144.85    9.18
   0  -1  -3 5200.39   43.44
   0  -1   3 4886.69   46.24
   0  -1  -3 5089.56   39.64
   0  -1   3 4794.88   39.39
   0  -1  -2 2538.20   27.88
   0  -1   2 2565.02   33.02
   0  -1   2 2497.74   30.22
   0  -1  -2 2620.11   29.40
   0  -1  -1 7460.28   71.96
   0  -1   1 6974.95   70.45
   0  -1   1 8267.36   96.03
   0  -1  -1 7656.65   71.52
   0   0 -10  277.71   12.25
   0   0 -10  311.83   13.66
   0   0 -10  303.57   11.73
   0   0  -9   28.29    8.81
   0   0  -9   23.45    9.63
   0   0  -9    9.45    9.84
   0   0  -8  583.64   13.36
   0   0  -8  527.47   11.87
   0   0  -8  598.43   12.00
   0   0  -7  156.32   10.01
   0   0  -7  114.16    9.77
   0   0  -6  646.62   12.30
   0   0  -6  651.45   12.69
   0   0  -5   97.70    8.53
   0   0  -5   60.88    9.26
   0   0  -4 1942.06   20.12
   0   0  -4 1964.20   21.89
   0   0  -3   33.08    6.27
   0   0  -3   28.15    9.18
   0   0  -2 2156.97   27.10
   0   0  -2 2223.20   30.02
   0   0   2 2201.80   28.02
   0   0   2 2079.05   27.42
   0   0   3   35.29    6.27
   0   0   3   36.91    9.19
   0   0   4 2050.50   22.17
   0   0   4 1933.87   21.28
   0   0   5   73.14    8.15
   0   0   5   69.94    9.17
   0   0   6  563.98   12.11
   0   0   7  133.29   11.59
   0   0   8  598.26   11.65
   0   0   9   41.62   11.42
   0   0  10  371.51   11.60
   0   1  -1 7797.43   91.26
   0   1  -1 6999.32   70.41
   0   1   1 6893.40   68.47
   0   1   1 5602.24   57.75
   0   1  -2 2459.15   30.04
   0   1   2 2790.96   31.64
   0   1  -2 2705.51   33.91
   0   1   2 2491.94   27.94
   0   1  -3 5878.32   55.01
   0   1  -3 5558.31   44.58
   0   1   3 5756.14   48.20
   0   1   3 5859.88   44.05
   0   1  -4  177.25    8.70
   0   1   4  144.34    7.73
   0   1  -4  151.07    9.81
   0   1   4  165.93    9.32
   0   1  -5 1615.75   20.89
   0   1  -5 1424.47   16.73
   0   1   5 1406.18   15.85
   0   1   5 1592.25   19.40
   0   1  -6   -2.02    9.65
   0   1  -6   24.80    9.23
   0   1   6    7.57    9.42
   0   1  -7  930.02   16.84
   0   1  -7  947.28   14.36
   0   1   7  902.45   13.01
   0   1  -8   19.98    9.05
   0   1   8   27.07    9.27
   0   1  -8   22.33    8.40
   0   1  -8   40.68    9.51
   0   1  -9  173.53   10.06
   0   1  -9  249.95   12.91
   0   1  -9  238.37   12.80
   0   1   9  213.98   12.54
   0   1  10   48.48    9.70
   0   1 -10   22.29   10.12
   0   1 -10   20.09   13.22
   0   1 -10   15.61    9.88
   0   2   0 3682.51   50.07
   0   2  -1  181.83   13.10
   0   2   1  193.09    9.71
   0   2   1  189.24    9.70
   0   2  -2 1391.95   23.90
   0   2  -2 1456.87   22.75
   0   2   2 1419.98   19.26
   0   2   2 1438.71   19.64
   0   2   3  176.14   12.47
   0   2  -3  185.12   11.17
   0   2  -3  160.12   10.59
   0   2   3  168.08    9.83
   0   2  -4 1678.47   22.06
   0   2   4 1626.47   17.59
   0   2  -4 1624.71   19.01
   0   2   4 1621.88   17.45
   0   2  -5   26.24    7.51
   0   2  -5   20.68    9.23
   0   2   5   16.90    7.04
   0   2   5   35.08    8.47
   0   2  -6 1213.99   18.49
   0   2  -6 1214.66   16.28
   0   2   6 1084.54   14.53
   0   2  -7   18.09   11.78
   0   2   7   24.11    8.55
   0   2  -7   43.34   10.10
   0   2  -8  391.58   13.56
   0   2  -8  333.37   11.43
   0   2  -8  323.42   12.27
   0   2   8  393.30   11.23
   0   2  -9   18.31   11.50
   0   2  -9   17.05    9.81
   0   2  -9   75.00    9.30
   0   2   9   -0.11   13.34
   0   2 -10  318.56   10.97
   0   2 -10  309.99   16.85
   0   2  10  241.56   10.92
   0   2 -10  209.97   13.84
   0   3   0   -1.19    7.26
   0   3  -1  471.46   17.95
   0   3   1  532.12   12.82
   0   3  -2  104.37    8.04
   0   3  -2  119.92    8.08
   0   3   2  126.01    7.59
   0   3   3 2923.42   26.53
   0   3   3 2647.82   23.98
   0   3  -3 2546.31   26.24
   0   3  -3 2885.49   34.76
   0   3  -4  196.57    8.81
   0   3  -4  182.49    9.80
   0   3   4  185.35    8.95
   0   3   5 1054.38   14.12
   0   3  -5 1165.95   19.28
   0   3  -5 1204.32   18.28
   0   3  -6   41.46    7.83
   0   3  -6   49.19   10.31
   0   3   6   46.91    9.89
   0   3   7  588.32   11.51
   0   3  -7  647.32   17.15
   0   3  -7  598.16   15.34
   0   3  -8   31.69   10.11
   0   3  -8   57.61   10.50
   0   3   8   58.42   10.34
   0   3  -9  272.46   10.95
   0   3  -9  272.81   13.71
   0   3   9  260.21   10.42
   0   3 -10   -2.59   13.97
   0   3 -10   33.93   10.41
   0   3  10   25.87    9.74
   0   4   1 1903.24   24.23
   0   4  -1 1733.07   30.52
   0   4  -2 2521.86   25.36
   0   4  -2 2087.38   32.56
   0   4   2 2512.00   25.56
   0   4  -3  390.96   13.98
   0   4  -3  400.53   13.52
   0   4   3  424.00   11.77
   0   4  -4 1967.85   21.53
   0   4  -4 1998.35   26.96
   0   4   4 1920.53   18.70
   0   4  -5    4.93    9.80
   0   4  -5   -1.79    6.69
   0   4   5    0.68    8.36
   0   4   6  797.75   13.36
   0   4  -6  836.14   14.52
   0   4  -6  823.45   16.51
   0   4  -7   39.66    9.86
   0   4  -7   13.61    9.03
   0   4   7   24.16    9.06
   0   4  -8  166.46   10.48
   0   4   8  222.38   10.87
   0   4  -8  232.92   11.49
   0   4  -8  225.30   12.61
   0   4  -9   54.11   14.04
   0   4  -9   57.42   10.19
   0   4  -9   64.42   16.02
   0   4   9   44.72   10.33
   0   4 -10  186.09   12.08
   0   4 -10  203.48   17.05
   0   4  10  201.28   10.54
   0   4 -10  158.59   12.21
   0   5  -1 7143.31   64.96
   0   5   1 7490.31   65.82
   0   5  -2  163.02   11.19
   0   5  -2  186.26    8.27
   0   5   2  178.61    8.14
   0   5   3 2980.83   26.64
   0   5  -3 2712.77   36.72
   0   5  -3 3177.87   29.30
   0   5  -4  109.45   10.48
   0   5  -4  115.44   11.52
   0   5   4  144.63   11.55
   0   5  -5  734.00   13.62
   0   5  -5  761.87   16.85
   0   5   5  654.61   11.83
   0   5  -6   59.91   12.36
   0   5  -6   37.97   10.22
   0   5   6   89.46   12.77
   0   5  -7  306.04   11.46
   0   5  -7  363.50   14.04
   0   5  -7  422.32   11.43
   0   5   7  425.37   12.17
   0   5  -8   22.10    9.12
   0   5  -8   53.49   10.41
   0   5  -8   46.22   12.15
   0   5   8   40.16    9.95
   0   5  -9  387.59   12.32
   0   5   9  431.41   12.10
   0   5  -9  430.54   20.41
   0   5  -9  298.21   16.85
   0   5 -10    2.41   11.74
   0   5 -10    5.40   10.17
   0   5  10   34.81   10.11
   0   5 -10   24.32   17.78
   0   6   1  321.47    9.14
   0   6  -1  304.65   11.92
   0   6  -2 4222.88   32.14
   0   6   2 4324.34   39.26
   0   6  -2 4794.85   52.30
   0   6  -3  316.44   15.09
   0   6  -3  408.88   12.10
   0   6   3  349.25    9.41
   0   6  -4 1861.72   20.01
   0   6   4 1804.15   18.22
   0   6  -4 1673.23   28.02
   0   6  -5   14.97    7.73
   0   6   5    5.04    8.66
   0   6  -5   19.02    8.84
   0   6  -6 1197.98   22.59
   0   6  -6 1265.08   17.91
   0   6   6 1310.62   16.47
   0   6  -7   30.77   13.96
   0   6  -7   18.43   10.89
   0   6  -7   38.14   12.96
   0   6   7    9.99   10.62
   0   6  -8  222.14   14.40
   0   6  -8  293.97   17.86
   0   6  -8  295.60   12.06
   0   6   8  290.03   11.78
   0   6   9   35.66   10.37
   0   6  -9   32.76   19.34
   0   6  -9    5.76   10.37
   0   6  -9   11.86   11.04
   0   6 -10  163.46   19.67
   0   6 -10   91.41   14.22
   0   6 -10  177.05   11.23
   0   6  10  166.98   12.07
   0   7   2   56.06    6.86
   0   7  -2   47.06   11.15
   0   7   3 1685.98   18.64
   0   7  -3 1528.13   29.88
   0   7  -3 1607.07   17.45
   0   7  -4  114.93    8.12
   0   7  -4   95.20   11.95
   0   7   4  114.11    8.52
   0   7  -5 1285.91   26.98
   0   7  -5 1374.77   17.31
   0   7   5 1445.04   16.78
   0   7  -6   49.83   12.32
   0   7  -6   28.84   10.56
   0   7  -6   18.66    8.15
   0   7   6   95.94   10.05
   0   7  -7  541.73   19.44
   0   7  -7  614.35   23.18
   0   7  -7  716.31   13.96
   0   7   7  677.81   13.88
   0   7   8   19.40   10.32
   0   7  -8   21.15   15.69
   0   7  -8   12.04   12.82
   0   7  -8   29.51   10.95
   0   7   9  340.63   12.97
   0   7  -9  232.93   17.74
   0   7  -9  324.78   26.91
   0   7  -9  412.24   14.04
   0   8   2  811.86   12.74
   0   8   3   54.10    7.05
   0   8  -3   47.60    6.79
   0   8  -3   38.65   10.40
   0   8  -4 1248.55   16.73
   0   8  -4  788.28   29.45
   0   8   4 1288.89   17.65
   0   8  -5    4.89   16.59
   0   8  -5    1.41    9.64
   0   8   5    6.04    8.36
   0   8  -6 1003.38   15.59
   0   8  -6  660.00   28.12
   0   8   6  953.06   14.70
   0   8  -6  604.85   27.28
   0   8  -7    4.18   12.94
   0   8   7  -25.44   10.32
   0   8  -7    6.80   14.48
   0   8  -7   39.93    9.21
   0   8  -8  390.65   13.08
   0   8  -8  153.63   18.35
   0   8  -8  217.02   21.88
   0   8   8  332.57   12.18
   0   8  -9    9.34   17.57
   0   8  -9   40.65   11.46
   0   8  -9    8.85   15.57
   0   8   9   18.80   11.77
   0   9   2   70.22    6.35
   0   9   3  940.37   13.65
   0   9  -3 1059.94   13.67
   0   9   4   45.85    7.30
   0   9  -4   47.46    6.63
   0   9  -5  863.67   16.33
   0   9   5  816.21   13.18
   0   9   6   48.29    9.72
   0   9  -6   58.74   11.11
   0   9  -7  445.90   13.84
   0   9   7  413.06   12.43
   0   9  -8   23.36   11.06
   0   9   8   28.41   10.49
   0   9  -9  150.18   12.74
   0   9   9  141.82   12.29
   0  10   3   66.07    6.59
   0  10   4  518.91   11.15
   0  10  -4  519.02   10.26
   0  10   5   26.96    7.84
   0  10  -5    5.09    9.65
   0  10   6  296.07   11.46
   0  10  -6  294.58   10.06
   0  10   7   20.68    9.78
   0  10  -7   18.40    9.65
   0  10   8  176.72   11.40
   0  10  -8  217.49   11.79
   0  10   9    9.16   11.72
   0  10  -9   35.65   11.56
   0  11   3  960.08   14.88
   0  11   4   69.12    7.47
   0  11  -4   61.49    6.99
   0  11   5  358.92    9.77
   0  11  -5  315.04    9.42
   0  11   6   28.31   11.83
   0  11  -6   14.34    8.34
   0  11   7  340.17   11.96
   0  11  -7  240.40   10.47
   0  11   8   37.56   11.22
   0  11  -8   42.03   10.22
   0  12   3   30.42    6.67
   0  12   4  667.14   12.43
   0  12   5    1.59    8.64
   0  12  -5   30.84    7.38
   0  12   6  331.73   11.22
   0  12  -6  311.58   11.29
   0  12   7    6.14   10.41
   0  12  -7    9.80    9.27
   0  12  -8  263.74   13.05
   0  12   8  308.25   12.57
   0  13  -3  564.62   12.15
   0  13   4   79.64    7.19
   0  13   5  368.01   10.83
   0  13   6   63.01    9.56
   0  13  -6   42.66    8.64
   0  13   7  312.49   12.60
   0  13  -7  313.65   12.58
   0  14  -4  590.44   12.80
   0  14   5   25.90    8.87
   0  14   6  439.49   12.97
   0  14  -7    8.46    8.87
   0  14   7   19.91   10.97
   0  15  -5  211.02    9.57
   0  15   6    7.19   10.16
   0  16  -5    9.32   10.20
  -1 -19   1    7.82    9.86
  -1 -19   1   14.43   10.46
   1 -19  -1    9.22   10.18
  -1 -19   1   13.13   11.78
   1 -19  -1   29.63    8.35
   1 -19  -1    5.87   11.62
  -1 -18   4   -1.10   13.93
  -1 -18   3  162.25   12.40
   1 -18  -3  284.77   11.71
  -1 -18   3  164.66   13.72
   1 -18  -3  246.40   11.85
  -1 -18   3  215.27   17.89
   1 -18  -3  114.05   12.51
   1 -18  -3  194.76   12.32
  -1 -18   2   37.75   10.75
   1 -18  -2   13.76    9.04
  -1 -18   2   16.10   11.94
  -1 -18   2    1.67   12.95
   1 -18  -2   11.70   11.36
  -1 -18   2   14.06   10.93
   1 -18  -2   35.18   10.47
   1 -18  -2   21.22    8.96
  -1 -18   1  188.22   13.56
   1 -18  -1  264.82   14.57
  -1 -18   1  176.98   13.17
   1 -18  -1  183.33   15.38
  -1 -18   1  216.80   14.95
  -1 -18   1  129.25   14.17
   1 -18  -1  177.08   13.56
   1 -18  -1  189.32   10.78
  -1 -17   5   -0.67   10.33
   1 -17  -5   23.16   10.83
  -1 -17   5   12.34   14.22
   1 -17  -5   11.79    9.83
   1 -17  -5   14.50    9.70
   1 -17  -5   20.71    9.87
   1 -17  -4  281.39   10.83
  -1 -17   4  165.03   13.66
  -1 -17   4  165.66   15.73
  -1 -17   4  205.68   15.53
   1 -17  -4  213.52   11.04
   1 -17  -4  248.86   11.28
   1 -17  -4  222.84   12.42
  -1 -17   3   20.37    8.91
   1 -17  -3   42.59   11.29
   1 -17  -3   16.03    8.88
  -1 -17   3   10.21   11.49
   1 -17  -3   -0.30   10.33
   1 -17  -3   31.89   11.22
  -1 -17   3    4.87   11.11
  -1 -17   3   22.70   14.14
   1 -17  -2  292.00   12.20
   1 -17  -2  221.35   12.64
  -1 -17   2  306.72   14.82
  -1 -17   2  272.53   17.91
   1 -17  -2  241.72   11.50
   1 -17  -2  263.95   10.46
  -1 -17   2  228.73   12.50
  -1 -17   2  216.46   12.18
  -1 -17   1   17.78   10.39
   1 -17  -1   22.05    9.89
   1 -17  -1   32.16    9.48
  -1 -17   1   18.09   11.82
   1 -17  -1   20.52   10.94
  -1 -17   1   26.72   13.70
  -1 -17   1    8.00    9.24
   1 -17  -1   21.16    8.93
   1 -16  -6   22.30   10.18
   1 -16  -6   38.44   10.55
   1 -16  -6   55.99   14.52
  -1 -16   6   51.86   14.23
   1 -16  -6   39.77   10.65
  -1 -16   5   67.73    8.96
   1 -16  -5  134.09    9.86
   1 -16  -5   86.15   10.13
  -1 -16   5   67.33   13.03
   1 -16  -5   90.78   10.09
   1 -16  -5   99.25   10.35
   1 -16  -4   29.05    9.31
  -1 -16   4   31.42   12.81
   1 -16  -4   83.77   15.09
  -1 -16   4   15.73    9.23
  -1 -16   4   32.97   14.82
   1 -16  -4   32.58   12.41
  -1 -16   4   24.78   11.23
   1 -16  -4   48.87    8.94
  -1 -16   3  324.61   12.90
  -1 -16   3  376.16   12.54
   1 -16  -3  393.83   10.54
   1 -16  -3  427.45   10.59
  -1 -16   3  404.26   17.70
   1 -16  -3  358.87   11.77
  -1 -16   3  381.34   14.41
   1 -16  -3  259.88   12.42
   1 -16  -2   20.54    6.79
  -1 -16   2   20.00   13.31
  -1 -16   2   19.25    9.41
  -1 -16   2   20.67   11.30
   1 -16  -2   28.56    9.03
   1 -16  -2   13.79   12.05
   1 -16  -2   20.87    7.99
  -1 -16   2   13.75    9.99
  -1 -16   1  566.53   13.02
  -1 -16   1  705.03   17.63
   1 -16  -1  691.46   13.88
  -1 -16   1  576.23   14.28
   1 -16  -1  518.40   13.19
   1 -16  -1  557.28   15.15
  -1 -16   1  562.44   14.25
   1 -16  -1  617.44   13.49
   1 -15  -7   21.21   12.18
   1 -15  -6  209.72   11.18
  -1 -15   6  179.88   16.06
   1 -15  -6  174.73   14.82
   1 -15  -6  169.06   11.25
   1 -15  -5   42.35    8.37
   1 -15  -5   15.58   13.27
   1 -15  -5   27.95   11.95
  -1 -15   5   30.47   11.99
   1 -15  -5   54.28   11.30
   1 -15  -4  491.93   11.84
  -1 -15   4  423.70   13.30
  -1 -15   4  521.73   17.73
  -1 -15   4  448.95   15.64
   1 -15  -4  433.42   12.99
   1 -15  -4  348.43   10.50
   1 -15  -4  411.70   13.35
  -1 -15   4  456.00   14.44
   1 -15  -3   77.81    9.76
  -1 -15   3   59.20    8.76
  -1 -15   3   78.53   13.28
   1 -15  -3   65.67   10.61
   1 -15  -3   82.94    6.86
  -1 -15   3   77.73   10.78
   1 -15  -3   78.16    9.84
  -1 -15   3   90.88   14.60
   1 -15  -2  491.30   10.77
  -1 -15   2  478.40   13.75
   1 -15  -2  507.25   13.75
   1 -15  -2  525.28   11.39
  -1 -15   2  406.09   11.22
   1 -15  -2  438.63   12.13
  -1 -15   2  480.60   13.49
  -1 -15   2  434.28   12.48
   1 -15  -1   70.30    7.89
  -1 -15   1   52.39    9.80
   1 -15  -1   75.69    7.61
   1 -15  -1   43.47    9.91
  -1 -15   1   66.12    9.24
  -1 -15   1   67.54    8.35
   1 -15  -1   47.97    9.09
  -1 -15   1   64.85    8.74
  -1 -14   7  266.92   14.14
   1 -14  -7  213.51   12.84
   1 -14  -7  242.55   11.58
   1 -14  -7  189.83   10.78
   1 -14  -6   53.42    9.06
   1 -14  -6   30.22    9.72
  -1 -14   6   41.14   11.32
   1 -14  -6   49.29    9.81
  -1 -14   5  262.51   23.28
   1 -14  -5  430.68   11.12
   1 -14  -5  333.93   10.94
   1 -14  -5  376.04   11.01
  -1 -14   5  419.49   19.10
   1 -14  -4  159.30    8.08
  -1 -14   4  134.00   10.73
   1 -14  -4  109.90    9.85
  -1 -14   4  141.20   12.18
   1 -14  -4  164.01    8.68
   1 -14  -4  116.44    9.99
  -1 -14   4  148.74   15.70
  -1 -14   3  183.12    9.57
   1 -14  -3  187.54    7.62
  -1 -14   3  167.11    9.29
   1 -14  -3  173.84   11.72
  -1 -14   3  192.49   11.50
  -1 -14   3  182.33   11.57
   1 -14  -3  156.58    8.11
   1 -14  -3  179.49   10.59
  -1 -14   2    7.09   10.77
   1 -14  -2   23.38    7.81
  -1 -14   2   20.53    7.94
   1 -14  -2   22.57    8.11
  -1 -14   2   12.31    9.73
   1 -14  -2  -12.92    7.23
  -1 -14   2   10.09    8.22
   1 -14  -2   19.06   11.01
   1 -14  -1  386.18   11.11
   1 -14  -1  338.35    9.54
  -1 -14   1  407.64   13.30
   1 -14  -1  322.99   12.78
  -1 -14   1  354.28   10.02
   1 -14  -1  328.16   11.99
  -1 -14   1  335.06   11.80
  -1 -14   1  328.05   12.27
   1 -13  -8   68.75    9.80
  -1 -13   8  148.81   11.64
   1 -13  -8  131.08   10.58
   1 -13  -8   79.55   10.67
   1 -13  -7   22.80    9.88
  -1 -13   7   12.40   13.39
   1 -13  -7   20.90    9.52
   1 -13  -7   38.68    9.41
   1 -13  -6  317.77   10.96
  -1 -13   6  357.44   16.76
   1 -13  -6  310.04   11.05
   1 -13  -6  289.18   10.52
  -1 -13   5   39.76   10.91
  -1 -13   5   43.24   11.29
   1 -13  -5   63.20    8.79
  -1 -13   5   45.09   13.55
   1 -13  -5   62.24    8.71
   1 -13  -5    6.11    8.75
  -1 -13   4  757.97   19.33
  -1 -13   4  657.68   15.64
   1 -13  -4  627.10   12.57
   1 -13  -4  434.49    9.75
  -1 -13   4  671.35   15.09
   1 -13  -4  566.33   12.94
   1 -13  -3   16.95    8.73
  -1 -13   3    7.69    6.99
  -1 -13   3   -0.03   11.67
   1 -13  -3   -4.52    7.07
  -1 -13   3   12.50   11.21
   1 -13  -3  -19.78    8.14
  -1 -13   3   -7.40    7.13
   1 -13  -3    7.33    8.61
  -1 -13   2  297.13   10.37
   1 -13  -2  286.72    8.96
   1 -13  -2  302.39    8.51
   1 -13  -2  308.44   12.27
  -1 -13   2  319.48   11.95
  -1 -13   2  303.28   10.56
  -1 -13   2  299.67   11.63
   1 -13  -2  291.22   11.15
  -1 -13   1  276.91   10.99
   1 -13  -1  270.80    8.47
   1 -13  -1  250.39   14.38
  -1 -13   1  291.87   12.09
   1 -13  -1  232.03   12.17
  -1 -13   1  240.83    9.03
  -1 -13   1  244.23   11.22
   1 -13  -1   98.83    7.68
   1 -12  -8   13.04    9.84
   1 -12  -8   32.33    9.97
  -1 -12   8   42.93   10.94
   1 -12  -8   57.51    9.02
   1 -12  -7  172.07    9.82
   1 -12  -7  213.15   10.40
  -1 -12   7  234.42   12.77
   1 -12  -7  189.12   10.43
   1 -12  -6   25.04    8.48
   1 -12  -6   28.74   11.10
  -1 -12   6   29.15   13.12
   1 -12  -6   42.95   10.38
   1 -12  -5  505.85   13.19
  -1 -12   5  538.44   17.68
   1 -12  -5  589.45   12.86
   1 -12  -5  536.71   12.14
  -1 -12   5  656.44   15.09
   1 -12  -4   51.91    9.44
   1 -12  -4   31.46    9.18
  -1 -12   4   49.24   10.47
  -1 -12   4   40.89    8.18
   1 -12  -4   43.96    6.93
   1 -12  -3  483.84   10.27
  -1 -12   3  400.98   10.42
   1 -12  -3  481.05   14.00
  -1 -12   3  499.82   13.41
   1 -12  -3  441.73   11.29
   1 -12  -3  447.26   11.53
  -1 -12   2   75.25   10.46
   1 -12  -2   75.85    6.52
   1 -12  -2   54.25    9.06
  -1 -12   2   80.91   11.18
   1 -12  -2   59.63    7.23
  -1 -12   2   79.47    7.23
   1 -12  -2   54.15    9.58
  -1 -12   1  594.89   11.21
   1 -12  -1  812.03   13.86
  -1 -12   1  902.27   15.43
  -1 -12   1  815.27   14.38
   1 -12  -1  779.61   13.67
   1 -12  -1  819.78   14.70
  -1 -12   1  786.90   14.10
   1 -12  -1  797.08   12.99
   1 -11  -9   17.28   11.54
   1 -11  -9   31.99   10.26
  -1 -11   9    2.07   11.24
   1 -11  -9   -5.97   10.94
   1 -11  -8  145.12    9.83
   1 -11  -8  231.83   10.23
  -1 -11   8  246.91   12.95
   1 -11  -8  234.34   11.16
   1 -11  -7   30.12    8.70
   1 -11  -7   30.38    8.70
  -1 -11   7   34.78   10.99
   1 -11  -7   33.55   11.35
   1 -11  -6  281.51   12.41
  -1 -11   6  283.81   19.09
   1 -11  -6  321.65   12.96
   1 -11  -6  336.67   10.32
  -1 -11   6  376.09   16.15
   1 -11  -5   43.20    8.64
  -1 -11   5   64.01   10.41
   1 -11  -5   69.47    9.53
  -1 -11   5   74.82    9.78
   1 -11  -5   73.49    9.85
   1 -11  -4  619.58   14.20
   1 -11  -4  693.82   12.18
  -1 -11   4  736.20   15.49
  -1 -11   4  609.12   12.73
   1 -11  -4  700.65   11.35
   1 -11  -3   22.78    8.29
  -1 -11   3   29.91    6.50
   1 -11  -3   27.18    7.91
  -1 -11   3   22.99    9.10
   1 -11  -3   27.83    6.49
  -1 -11   2  968.30   15.19
   1 -11  -2 1444.71   19.75
   1 -11  -2 1404.96   17.70
  -1 -11   2 1361.37   15.65
  -1 -11   2 1496.94   20.27
   1 -11  -2 1309.93   15.74
   1 -11  -2  961.54   14.69
   1 -11  -1  233.93    9.37
   1 -11  -1  219.60    7.15
   1 -11  -1  204.83    9.02
  -1 -11   1  257.18    9.20
  -1 -11   1  203.31    7.83
   1 -11  -1  206.39    9.48
  -1 -11   1  218.60   10.08
   1 -10  -9  116.71   10.02
   1 -10  -9  163.42   11.92
  -1 -10   9  214.43   11.98
   1 -10  -9  156.76   10.95
   1 -10  -8   54.36    8.51
   1 -10  -8   47.92    8.79
  -1 -10   8   38.59   10.30
   1 -10  -8   34.55    8.94
   1 -10  -7  228.05    9.79
  -1 -10   7  252.83   18.81
   1 -10  -7  332.71    9.94
  -1 -10   7  333.56   13.70
   1 -10  -7  285.81   13.16
  -1 -10   6    4.62    9.98
   1 -10  -6    6.59    7.86
   1 -10  -6    3.93    8.62
  -1 -10   6   18.35   10.35
   1 -10  -6    8.77   10.46
   1 -10  -5  376.09   10.07
  -1 -10   5  467.25   14.59
   1 -10  -5  456.92   10.72
  -1 -10   5  546.86   16.91
   1 -10  -5  491.17   12.25
   1 -10  -4   25.44    7.28
   1 -10  -4   12.70    8.53
  -1 -10   4   45.54   12.36
   1 -10  -4   27.09    7.69
  -1 -10   4   40.68    6.90
   1 -10  -3 1480.18   15.94
   1 -10  -3 1078.73   14.43
  -1 -10   3 1412.12   16.79
   1 -10  -3 1539.86   17.09
  -1 -10   3 1431.22   19.53
   1 -10  -2   86.58    8.43
  -1 -10   2   62.42    5.89
   1 -10  -2   78.83    6.38
   1 -10  -2   73.99    8.33
   1 -10  -2   66.07    6.63
  -1 -10   2   74.18    6.53
  -1 -10   2   86.98    9.34
   1 -10  -1 1662.66   17.11
   1 -10  -1 1762.25   20.56
   1 -10  -1 1629.67   19.02
  -1 -10   1 1789.22   20.62
  -1 -10   1 1262.61   15.32
  -1 -10   1 1054.89   15.73
   1 -10  -1 1666.31   20.15
   1  -9  -9    9.87    8.85
   1  -9  -9    7.36    9.51
   1  -9  -9   21.76   12.51
  -1  -9   9   24.39   11.30
   1  -9  -8  384.20   11.45
   1  -9  -8  592.81   12.07
  -1  -9   8  610.91   13.20
   1  -9  -8  458.48   12.59
  -1  -9   7   48.91   11.13
   1  -9  -7   18.16    8.26
   1  -9  -7   51.49   10.97
   1  -9  -7   31.87   11.31
  -1  -9   7   53.69   10.18
  -1  -9   6  707.82   19.51
  -1  -9   6  754.94   14.51
   1  -9  -6  546.96   10.25
   1  -9  -6  690.54   12.05
   1  -9  -6  663.03   11.84
  -1  -9   5  198.80   11.48
   1  -9  -5  141.82    8.42
   1  -9  -5  193.22    8.93
  -1  -9   5  215.29   10.98
   1  -9  -5  128.28    7.86
   1  -9  -4  759.92   12.03
   1  -9  -4  469.39   10.19
  -1  -9   4  804.25   15.26
  -1  -9   4  826.81   15.51
   1  -9  -4  754.99   11.06
  -1  -9   3   13.24    5.19
   1  -9  -3   54.57    9.77
  -1  -9   3   18.33   11.12
   1  -9  -3    5.49    6.46
   1  -9  -3   27.95    7.40
   1  -9  -2 1306.43   16.23
   1  -9  -2 1202.66   15.08
  -1  -9   2 1178.63   15.15
  -1  -9   2 1213.18   17.63
   1  -9  -2 1103.00   15.15
   1  -9  -2 1210.03   15.40
   1  -9  -1   11.47   11.23
   1  -9  -1   -0.05    8.32
  -1  -9   1   22.65    6.10
   1  -9  -1   23.68    8.48
   1  -9  -1   19.33    9.87
  -1  -9   1   19.86    8.86
  -1  -9   1   16.27    6.75
   1  -8 -10   26.13    9.30
   1  -8 -10   26.66   11.09
   1  -8 -10   15.17   10.14
  -1  -8  10   -6.14   11.00
   1  -8  -9  272.46   10.91
   1  -8  -9  200.99   10.24
   1  -8  -9  305.72   11.24
  -1  -8   9  326.22   12.20
   1  -8  -8   43.38    9.09
  -1  -8   8   57.12    9.76
   1  -8  -8   63.69    9.80
   1  -8  -8   54.82   11.33
  -1  -8   8   64.69   10.22
   1  -8  -7  355.11    9.88
  -1  -8   7  442.86   13.16
   1  -8  -7  498.75   11.34
  -1  -8   7  484.84   12.14
   1  -8  -7  434.85   10.91
   1  -8  -6   22.93    6.99
  -1  -8   6   34.32    8.20
   1  -8  -6   28.70    7.75
  -1  -8   6   34.16   12.39
   1  -8  -6   28.55    8.68
   1  -8  -5 1042.15   13.58
  -1  -8   5 1007.55   15.48
   1  -8  -5 1109.66   13.47
  -1  -8   5 1122.43   19.40
   1  -8  -4   19.17    7.15
  -1  -8   4   14.87    7.24
  -1  -8   4   29.20    8.67
   1  -8  -4   23.43    6.79
  -1  -8   3 1105.81   14.77
   1  -8  -3 1280.94   15.83
  -1  -8   3 1176.89   18.03
   1  -8  -3 1066.00   13.01
   1  -8  -2  176.92    8.34
   1  -8  -2  159.84    8.13
  -1  -8   2  153.40    7.58
  -1  -8   2  181.51    9.33
   1  -8  -2  176.28    7.22
   1  -8  -1 1608.55   18.35
   1  -8  -1 1518.92   18.15
  -1  -8   1 1558.05   19.27
  -1  -8   1 1462.28   21.11
   1  -8  -1 1483.73   17.35
  -1  -8   1 1427.50   16.55
   1  -8  -1 1364.52   18.82
   1  -7 -10   86.87   10.28
   1  -7 -10  128.47   10.34
   1  -7 -10  104.33   12.81
  -1  -7  10  143.17   13.92
   1  -7  -9   36.30    8.64
   1  -7  -9   37.50   10.05
   1  -7  -9   20.58    8.51
  -1  -7   9   28.69   10.16
   1  -7  -8  178.81    8.87
  -1  -7   8  257.80   11.91
   1  -7  -8  259.23    9.65
  -1  -7   8  251.27   10.90
   1  -7  -8  157.43    8.41
  -1  -7   7   86.68    8.95
   1  -7  -7   70.94    8.39
   1  -7  -7   61.55    9.59
  -1  -7   7   90.39   10.03
   1  -7  -7   78.97    9.03
  -1  -7   6  694.51   15.91
   1  -7  -6  723.34   12.65
  -1  -7   6  689.96   13.66
   1  -7  -6  728.12   13.51
   1  -7  -5  137.13    9.08
  -1  -7   5  118.07    9.70
   1  -7  -5  135.55    8.30
  -1  -7   5  124.37    7.98
  -1  -7   4 1557.55   21.25
   1  -7  -4 1491.09   15.06
  -1  -7   4 1517.60   19.86
   1  -7  -4 1571.00   16.99
  -1  -7   3   65.78    6.62
   1  -7  -3   55.89    7.20
  -1  -7   3   57.20    9.31
   1  -7  -3   64.19    6.45
   1  -7  -2 2169.14   20.95
  -1  -7   2 2141.86   21.25
  -1  -7   2 2135.52   25.08
   1  -7  -2 2170.28   20.87
   1  -7  -1  142.95    7.12
  -1  -7   1  290.68   11.56
   1  -7  -1  294.24    9.63
   1  -7  -1  325.32    8.28
   1  -7  -1  288.87    9.28
  -1  -7   1  292.83    9.62
  -1  -7   1  321.38   11.28
   1  -6 -10   36.34    9.61
   1  -6 -10   18.61   11.79
   1  -6 -10   39.60    9.85
  -1  -6  10   51.47    9.87
   1  -6  -9   76.47   10.39
   1  -6  -9  103.91    8.71
   1  -6  -9  157.60   10.22
  -1  -6   9  132.58   10.73
   1  -6  -8  101.93    8.18
   1  -6  -8  157.16    8.57
  -1  -6   8  147.28    9.73
   1  -6  -8  152.68   11.56
  -1  -6   8  174.76   10.41
  -1  -6   7  472.53   12.46
  -1  -6   7  518.51   11.62
   1  -6  -7  509.20   10.91
   1  -6  -7  510.86   12.46
  -1  -6   6  113.75    8.59
  -1  -6   6  136.60    9.37
   1  -6  -6  127.20    8.89
   1  -6  -6  101.87    8.47
   1  -6  -5  934.63   13.76
  -1  -6   5  890.15   14.54
   1  -6  -5  951.22   12.10
  -1  -6   5  902.12   15.08
  -1  -6   4  733.63   14.23
   1  -6  -4  702.98   10.76
  -1  -6   4  693.45   14.21
   1  -6  -4  732.97   10.87
   1  -6  -3 1725.59   16.85
   1  -6  -3 1586.51   16.15
  -1  -6   3 1632.11   22.03
  -1  -6   3 1730.91   21.14
   1  -6  -2  535.84   10.37
  -1  -6   2  520.34   12.01
  -1  -6   2  520.99   14.05
   1  -6  -2  526.44    9.65
  -1  -6   1 3229.07   38.44
   1  -6  -1 3793.70   35.65
   1  -6  -1 3214.76   29.54
   1  -6  -1 3295.58   31.70
  -1  -6   1 3431.03   34.79
  -1  -6   1 3207.04   28.53
   1  -5 -10   80.72   11.22
   1  -5 -10  184.68   10.11
  -1  -5  10  183.59   11.16
   1  -5 -10  144.28   12.38
   1  -5  -9   49.81    8.04
   1  -5  -9   48.68    8.60
   1  -5  -9   49.90   11.48
  -1  -5   9   37.45   10.08
   1  -5  -8  220.25   10.03
  -1  -5   8  270.46   10.63
   1  -5  -8  296.67   10.65
  -1  -5   8  316.52   10.82
  -1  -5   7  150.48    9.08
   1  -5  -7  139.03    9.41
   1  -5  -7  108.36    9.06
  -1  -5   7  155.45   10.04
  -1  -5   6  432.76   12.95
   1  -5  -6  428.20   10.57
  -1  -5   6  410.88   10.96
   1  -5  -6  400.44   11.45
  -1  -5   5  128.76    9.29
   1  -5  -5  114.20    7.43
  -1  -5   5  114.88    9.45
   1  -5  -5  110.08    7.62
  -1  -5   4 2874.00   30.70
   1  -5  -4 2647.77   21.15
  -1  -5   4 2699.40   27.66
   1  -5  -4 2760.73   22.18
  -1  -5   3  270.62   10.48
   1  -5  -3  244.16    7.89
  -1  -5   3  229.54   11.17
   1  -5  -3  257.07    7.49
  -1  -5   2 3847.21   33.77
   1  -5  -2 3850.19   33.29
   1  -5  -2 3975.11   33.35
  -1  -5   2 3977.40   42.31
   1  -5  -1  231.72    8.01
  -1  -5   1  238.75   12.26
   1  -5  -1  280.04    8.40
  -1  -5   1  240.08   10.88
   1  -5  -1  232.18    8.32
  -1  -5   1  241.03    9.80
   1  -4 -10   12.24    9.30
   1  -4 -10   38.24    9.59
   1  -4 -10   23.85   10.16
  -1  -4  10   22.03    9.84
   1  -4  -9  234.39    9.79
   1  -4  -9  271.79   10.66
   1  -4  -9  304.53   10.55
  -1  -4   9  320.33   10.87
   1  -4  -8    1.49   10.61
  -1  -4   8   12.97    8.70
   1  -4  -8  -24.07    9.31
  -1  -4   8   -5.68    9.20
   1  -4  -7  923.77   13.35
  -1  -4   7  970.61   15.14
   1  -4  -7  724.93   11.45
  -1  -4   7  974.03   14.28
  -1  -4   6  101.89    7.45
   1  -4  -6  112.19    9.29
  -1  -4   6   69.99    9.27
   1  -4  -6   95.96    8.28
  -1  -4   5 1766.90   21.49
  -1  -4   5 1835.15   21.05
   1  -4  -5 1764.29   16.34
   1  -4  -5 1816.86   16.92
  -1  -4   4  355.35    9.89
   1  -4  -4  338.96    8.46
  -1  -4   4  332.51   11.31
   1  -4  -4  344.44    8.49
   1  -4  -3 1527.32   15.82
  -1  -4   3 1638.55   21.37
  -1  -4   3 1457.44   23.24
   1  -4  -3 1550.16   16.34
  -1  -4   2  550.68   11.78
   1  -4  -2  566.01   10.70
   1  -4  -2  570.19   11.03
  -1  -4   2  477.05   16.07
   1  -4  -1 3950.76   37.65
   1  -4  -1 3880.31   37.45
  -1  -4   1 4200.74   53.80
  -1  -4   1 3903.13   34.52
   1  -3 -10  178.83   12.94
   1  -3 -10  322.15   12.48
   1  -3 -10  308.62   11.42
  -1  -3  10  386.03   14.23
   1  -3  -9  -14.42    7.84
   1  -3  -9    7.12    8.73
   1  -3  -9    3.93    9.70
  -1  -3   9   14.72    8.75
  -1  -3   8  685.30   13.40
   1  -3  -8  656.05   12.94
  -1  -3   8  697.70   15.59
   1  -3  -8  667.98   12.69
   1  -3  -7   25.96    7.89
  -1  -3   7   23.91    8.00
   1  -3  -7   18.76    8.30
  -1  -3   7   20.11    8.76
   1  -3  -6 1295.06   15.17
  -1  -3   6 1380.73   18.33
   1  -3  -6 1278.94   14.75
  -1  -3   6 1257.56   16.90
  -1  -3   5   37.81    7.09
   1  -3  -5   35.12    7.65
  -1  -3   5   28.19    8.57
   1  -3  -5   21.67    7.02
  -1  -3   4 3168.95   30.01
   1  -3  -4 3123.27   24.63
   1  -3  -4 3362.65   26.11
  -1  -3   4 3375.08   33.19
  -1  -3   3   40.35    8.80
   1  -3  -3   44.26    6.50
  -1  -3   3   37.80    7.85
   1  -3  -3   42.50    6.75
   1  -3  -2 5795.44   47.46
   1  -3  -2 5757.02   46.63
  -1  -3   2 5249.69   55.23
  -1  -3   2 6034.57   56.19
   1  -3  -1  605.09   12.14
  -1  -3   1  600.51   12.56
  -1  -3   1  489.75   26.22
   1  -3  -1  647.21   13.45
   1  -2 -10   29.03    9.28
   1  -2 -10   24.49    9.97
   1  -2 -10   15.54    9.35
  -1  -2  10   54.87    8.89
   1  -2  -9  206.52   11.08
   1  -2  -9  215.09   11.15
  -1  -2   9  202.52    9.54
  -1  -2   8   59.99    8.62
   1  -2  -8   61.13   10.05
   1  -2  -8   77.68    9.52
  -1  -2   8   62.56   11.80
   1  -2  -7 1211.82   16.23
  -1  -2   7 1202.00   16.00
   1  -2  -7 1188.51   14.47
  -1  -2   7 1170.20   14.62
   1  -2  -6   21.46    7.66
  -1  -2   6   10.44    6.87
   1  -2  -6   31.98   11.70
  -1  -2   6   10.77    8.81
  -1  -2   5 1657.65   19.76
   1  -2  -5 1616.93   16.60
  -1  -2   5 1561.62   17.78
   1  -2  -5 1840.49   19.37
  -1  -2   4  131.08    9.80
   1  -2  -4  123.80    7.84
  -1  -2   4  128.39    8.96
   1  -2  -4  134.16    7.20
  -1  -2   3 5624.37   50.76
  -1  -2   3 5136.58   44.85
   1  -2  -3 4138.20   33.01
   1  -2  -3 5281.88   40.75
  -1  -2   2  950.93   16.57
  -1  -2   2  923.70   20.33
   1  -2  -2  927.47   14.61
   1  -2  -2  885.67   14.01
  -1  -2   1 3318.25   35.53
   1  -2  -1 3055.21   34.37
   1  -2  -1 3285.02   36.31
  -1  -2   1 3109.96   62.03
   1  -1 -11   23.37    9.51
   1  -1 -11   31.16   10.41
   1  -1 -11   18.20    9.08
  -1  -1  11   36.94    9.79
   1  -1 -10  269.54   11.20
   1  -1 -10  272.11   12.70
   1  -1 -10  314.36   11.64
  -1  -1  10  295.81   10.27
   1  -1  -9   34.05   11.34
   1  -1  -9   68.76    9.06
  -1  -1   9   37.58    8.61
   1  -1  -8  368.46   10.54
  -1  -1   8  387.91   13.60
   1  -1  -8  395.49   11.43
  -1  -1   8  415.30   13.11
   1  -1  -7  294.51   11.85
   1  -1  -7  292.24   10.74
  -1  -1   7  295.08    9.96
  -1  -1   7  285.38    9.15
   1  -1  -6 1670.99   18.96
  -1  -1   6 1519.58   18.09
   1  -1  -6 1637.46   16.77
  -1  -1   6 1553.64   16.91
   1  -1  -5  714.35   11.68
  -1  -1   5  660.20   12.07
   1  -1  -5  692.06   14.07
  -1  -1   5  698.49   14.27
   1  -1  -4 1345.78   15.84
  -1  -1   4 1282.70   17.06
   1  -1  -4 1343.95   17.65
  -1  -1   4 1341.52   17.01
   1  -1  -3 1059.39   14.75
  -1  -1   3 1021.15   15.29
   1  -1  -3 1055.47   15.21
  -1  -1   3 1047.72   16.51
   1  -1  -2 1449.10   20.09
  -1  -1   2 1294.12   19.28
  -1  -1   2 1256.61   21.13
   1  -1  -2 1361.27   19.10
   1  -1  -1   98.09    7.84
  -1  -1   1  107.07    8.09
  -1  -1   1  105.14   11.54
   1  -1  -1  105.63    7.76
   1   0 -11   50.86    9.75
   1   0 -11   49.65   10.16
   1   0 -11   84.59   13.78
   1   0 -10   44.58   10.90
   1   0 -10   33.02   12.55
   1   0 -10   62.31    9.95
   1   0  -9  128.72    9.85
   1   0  -9  121.63    8.85
   1   0  -8  326.48   12.20
   1   0  -8  287.52   13.45
   1   0  -7  530.44   11.77
   1   0  -7  520.16   12.23
   1   0  -6  368.04    9.86
   1   0  -6  346.61   10.35
   1   0  -5 1287.67   16.22
   1   0  -5  997.29   14.37
   1   0  -4   10.65    8.59
   1   0  -4   13.69    7.88
   1   0  -3 4594.57   40.82
   1   0  -3 4349.78   37.87
   1   0  -2 3449.31   35.74
   1   0  -2 3213.54   34.53
   1   0   1 1081.16   19.29
   1   0   1 1198.74   22.30
   1   0   2  756.86   15.31
   1   0   3 5421.07   39.48
   1   0   4   38.73    9.00
   1   0   5 1243.26   16.66
   1   0   6   22.87   12.70
   1   0   7  511.78   11.45
   1   0   8  161.07    9.52
   1   0   9  398.32   11.00
   1   0  10   28.06   11.01
   1   1   0 8679.22   70.76
  -1   1   010285.95   85.05
   1   1   0 9212.80   90.74
   1   1   1 1458.92   22.35
  -1   1  -1 1371.45   19.46
   1   1   1 1326.56   25.38
  -1   1  -2 5068.16   40.43
  -1   1  -2 5551.67   55.20
   1   1   2 5199.47   43.53
  -1   1  -3  390.66   10.87
   1   1   3  385.93   11.19
  -1   1  -3  440.42   11.62
  -1   1  -4 1599.96   19.92
  -1   1  -4 1955.59   23.71
  -1   1  -4 1850.56   19.14
   1   1   4 1587.10   17.75
  -1   1  -5  190.47    9.57
  -1   1  -5  201.15    9.50
   1   1   5  171.99    9.94
  -1   1  -5  188.38    9.03
  -1   1  -6  678.40   12.65
  -1   1  -6  830.63   15.94
   1   1   6  767.87   13.11
  -1   1  -6  812.28   16.11
  -1   1  -7   70.21    9.48
   1   1   7   77.24    9.68
  -1   1  -7   92.54    9.71
  -1   1  -7   80.36   10.48
  -1   1  -8  204.36   10.79
  -1   1  -8  333.64   12.49
  -1   1  -8  316.47   10.55
   1   1   8  266.55   10.15
  -1   1  -9   49.97   10.06
   1   1   9   -4.90    8.89
  -1   1  -9   11.28   13.13
  -1   1  -9   30.86   12.19
   1   1  10  218.10   10.53
  -1   1 -10  291.74   14.74
  -1   1 -10  291.97   11.38
  -1   1 -10  195.41   12.56
  -1   2   0  205.67    7.79
   1   2   0  199.66   16.28
   1   2   0  210.77   10.11
   1   2   1  779.81   15.30
  -1   2  -1  789.15   13.50
  -1   2  -1  462.46   18.51
   1   2   1  717.03   18.07
  -1   2  -2   52.05    8.32
  -1   2  -2   48.33   11.24
   1   2   2   28.08    9.97
  -1   2  -2   47.13   12.45
  -1   2  -3 2041.27   27.53
  -1   2  -3 1786.36   19.04
  -1   2  -3 1761.98   24.48
   1   2   3 1759.30   20.14
  -1   2  -4   96.55    9.23
  -1   2  -4   80.10    8.32
   1   2   4   85.80    9.47
  -1   2  -5  896.86   13.78
   1   2   5  842.69   13.05
  -1   2  -5 1008.72   18.37
  -1   2  -6  161.00    9.95
  -1   2  -6  183.43   10.78
   1   2   6  145.20    9.86
  -1   2  -7  935.10   14.68
  -1   2  -7  923.21   17.95
   1   2   7  912.98   13.33
  -1   2  -8  138.24   12.54
   1   2   8  120.38    9.12
  -1   2  -8  141.40   11.95
  -1   2  -9  234.89   14.85
  -1   2  -9  268.75   11.53
   1   2   9  236.31   10.84
   1   2  10   26.40    9.33
  -1   2 -10   46.05   11.74
  -1   2 -10   25.26   12.94
  -1   3   0 2616.12   27.01
   1   3   0 2822.00   29.69
   1   3   0 2649.47   40.69
   1   3   1  451.49   11.41
  -1   3  -1  430.82    9.59
   1   3   1  461.95   13.63
  -1   3  -2  663.62   23.60
  -1   3  -2  712.18   12.22
   1   3   2  605.94   14.40
  -1   3  -2  724.74   23.45
  -1   3  -3  139.34   11.26
   1   3   3  115.80    9.37
  -1   3  -3  120.28    8.99
  -1   3  -3   61.49    8.39
  -1   3  -4  394.72   11.88
  -1   3  -4  407.39   11.04
  -1   3  -4  375.92   12.23
   1   3   4  377.04   11.49
  -1   3  -5   55.97   10.38
  -1   3  -5   47.30    7.96
  -1   3  -5   39.44    9.36
   1   3   5   48.80    8.95
  -1   3  -6 1072.46   17.60
  -1   3  -6 1167.39   20.65
  -1   3  -6 1276.58   16.77
   1   3   6 1119.64   14.93
  -1   3  -7   97.66    9.76
  -1   3  -7   95.39   12.81
  -1   3  -7   92.57   11.46
   1   3   7   60.50   12.42
  -1   3  -8  391.00   14.41
  -1   3  -8  412.42   11.48
   1   3   8  347.70   11.16
  -1   3  -8  329.06   12.40
  -1   3  -9   26.61   10.24
  -1   3  -9   29.41   14.40
   1   3   9   52.61    9.11
  -1   3  -9   22.34   10.14
   1   3  10   82.47   10.20
  -1   3 -10   80.93   10.50
  -1   3 -10  118.13   17.56
  -1   3 -10   64.62   11.29
   1   4   0 3737.23   46.60
  -1   4   0 3952.97   35.91
   1   4   0 4262.53   36.80
   1   4   1 2982.30   27.49
  -1   4  -1 2983.62   25.62
   1   4   1 3028.66   33.17
  -1   4  -2  270.15    8.72
   1   4   2  247.33   10.60
   1   4   3 1837.18   19.96
  -1   4  -3 1629.90   17.29
  -1   4  -3 1660.14   29.58
  -1   4  -3 1022.34   24.56
  -1   4  -4  282.52   11.14
  -1   4  -4  296.21    9.99
   1   4   4  324.21   10.84
  -1   4  -4  275.76   11.82
  -1   4  -5  771.71   17.11
  -1   4  -5  693.95   13.09
   1   4   5  708.73   12.43
  -1   4  -5  678.41   15.60
   1   4   6   57.61   10.03
  -1   4  -6   46.50   13.12
  -1   4  -6   72.57   10.29
  -1   4  -6   50.60   11.67
  -1   4  -7  370.99   12.66
  -1   4  -7  340.33   14.11
   1   4   7  351.15   11.66
  -1   4  -7  304.07   14.37
  -1   4  -8   34.13   12.04
  -1   4  -8   46.63   15.41
   1   4   8   41.74   10.43
  -1   4  -8   52.75   12.50
  -1   4  -9  283.73   11.04
  -1   4  -9  236.69   18.95
  -1   4  -9  207.92   12.27
   1   4   9  253.94   10.59
   1   5   0 5382.40   59.25
  -1   5   0 5809.49   48.95
   1   5   0 6084.21   46.74
   1   5   1  739.02   12.75
  -1   5  -1  746.34   11.19
   1   5   1  732.84   14.00
  -1   5  -2 2517.70   21.62
   1   5   2 2477.69   25.49
  -1   5  -3  455.23   10.27
   1   5   3  434.92   10.97
  -1   5  -4  890.39   22.68
  -1   5  -4  959.87   13.74
   1   5   4  924.54   14.22
  -1   5  -4  818.34   23.01
  -1   5  -5   99.19    9.49
  -1   5  -5   98.88   10.00
   1   5   5   95.78   10.57
  -1   5  -5   91.96   11.50
  -1   5  -6  820.31   14.02
  -1   5  -6  895.13   22.47
   1   5   6  794.05   13.81
  -1   5  -6  687.74   19.41
  -1   5  -7    2.68   11.00
   1   5   7   -3.27   14.16
  -1   5  -7    2.67   11.42
  -1   5  -8  532.78   12.74
  -1   5  -8  526.24   21.55
  -1   5  -8  390.47   14.95
   1   5   8  499.05   13.13
  -1   5  -9   46.68   12.36
  -1   5  -9   55.55   19.29
  -1   5  -9   31.64   11.34
   1   5   9   50.47   10.72
   1   6   0  996.72   16.91
  -1   6   0  976.60   13.32
   1   6   1 2522.58   29.53
  -1   6  -1 2531.68   22.69
   1   6   1 2388.95   22.17
  -1   6  -2  669.19   11.96
   1   6   2  531.02   11.16
  -1   6  -3 2422.64   21.67
   1   6   3 2312.22   22.84
  -1   6  -4  109.00    8.80
   1   6   4  116.55    9.68
  -1   6  -5  802.81   24.36
  -1   6  -5 1053.61   15.30
  -1   6  -5  568.67   22.01
   1   6   5 1020.15   16.75
  -1   6  -6  100.92   14.42
  -1   6  -6   94.92    9.93
   1   6   6   78.82   10.97
  -1   6  -6   80.48   14.07
  -1   6  -7  467.03   23.75
  -1   6  -7  427.11   12.43
  -1   6  -7  318.16   16.78
   1   6   7  422.45   12.19
  -1   6  -8   28.30   18.01
  -1   6  -8   80.55   11.00
  -1   6  -8   19.34   13.06
   1   6   8   36.50   10.72
  -1   6  -9  250.79   23.18
  -1   6  -9  303.30   12.40
  -1   6  -9  159.14   17.34
   1   6   9  269.68   12.37
   1   7   0 1551.17   18.15
   1   7   1  829.16   14.13
  -1   7  -1  897.24   13.00
  -1   7  -2  706.11   10.56
   1   7   2  826.47   13.40
   1   7   3   28.31    7.75
  -1   7  -3    5.13    6.95
  -1   7  -4 1575.53   18.47
   1   7   4 1529.23   17.73
   1   7   5  468.96   13.66
  -1   7  -5  396.29   11.30
  -1   7  -6  800.81   13.55
   1   7   6  697.57   16.57
   1   7   7   53.91   10.77
  -1   7  -7   25.18   16.43
  -1   7  -7   63.30   10.90
  -1   7  -7   28.06   17.33
   1   7   8  491.96   12.71
  -1   7  -8  323.99   26.27
  -1   7  -8  536.11   16.54
  -1   7  -8  225.14   21.50
  -1   7  -9   33.51   20.25
  -1   7  -9   49.56   11.42
  -1   7  -9   20.87   19.88
   1   7   9   41.08   10.83
   1   8   0   95.69    8.58
  -1   8  -1  421.98    8.70
   1   8   1  400.03   10.97
   1   8   2   81.21    7.40
  -1   8  -2   87.93    9.05
   1   8   3  734.43   14.16
  -1   8  -3  745.05   12.93
  -1   8  -4  201.30    8.40
   1   8   4  140.86    8.97
  -1   8  -5 1214.06   16.17
   1   8   5  996.61   15.22
  -1   8  -6  144.16   12.04
   1   8   6  162.57   11.06
   1   8   7  410.66   12.21
  -1   8  -7  392.05   13.16
   1   8   8   87.03   10.54
  -1   8  -8  104.96   12.16
  -1   8  -9  273.15   14.59
   1   8   9  266.87   12.38
   1   9   1   54.53    8.13
  -1   9  -1   68.84    6.39
   1   9   2  888.45   14.16
  -1   9  -2  954.58   11.65
  -1   9  -3   51.99    6.35
   1   9   3   40.58    6.92
  -1   9  -4  829.72   12.22
   1   9   4  841.43   14.26
  -1   9  -5  239.37    9.04
   1   9   5  234.46    9.89
  -1   9  -6  527.19   11.84
   1   9   6  541.03   13.18
  -1   9  -7   39.52   10.35
   1   9   7   65.38   10.05
   1   9   8  194.46   11.50
  -1   9  -8  170.33   12.49
  -1  10  -1 1869.01   19.59
   1  10   2   74.56    6.57
  -1  10  -2   83.88    6.43
   1  10   3  437.16   10.31
  -1  10  -3  457.56    9.05
   1  10   4   73.88   10.48
  -1  10  -4   72.11    7.76
  -1  10  -5  588.88   11.19
   1  10   5  656.74   12.46
   1  10   6   -2.98   10.27
  -1  10  -6   18.45    8.63
  -1  10  -7  263.67   11.71
   1  10   7  282.85   12.20
  -1  10  -8   16.14   11.28
   1  10   8    0.69   11.20
   1  11   2 1515.67   22.52
  -1  11  -2 1783.98   17.10
  -1  11  -3   44.77    9.45
   1  11   3   39.37   10.11
  -1  11  -4  346.81    9.00
   1  11   4  331.36   10.24
   1  11   5   11.92    8.61
  -1  11  -5    0.54    7.25
   1  11   6  531.61   13.30
  -1  11  -6  502.70   11.76
   1  11   7   24.62   11.02
  -1  11  -7   33.49    9.50
   1  11   8   92.64   13.80
  -1  11  -8  117.87   12.30
  -1  12  -2  279.90   11.03
  -1  12  -3  461.42    9.46
   1  12   3  431.54   10.80
   1  12   4   49.00    7.95
  -1  12  -4   59.90    9.13
  -1  12  -5  406.16   11.16
   1  12   5  389.47   12.04
   1  12   6   32.43   10.41
  -1  12  -6   31.62    9.93
   1  12   7  176.25   14.38
  -1  12  -7  174.64   10.99
   1  13   3  117.47    9.55
  -1  13  -3  119.96   10.53
  -1  13  -4  373.27    9.39
   1  13   4  408.53   12.89
   1  13   5   79.39    9.85
  -1  13  -5   88.16    7.71
   1  13   6  435.56   13.23
  -1  13  -6  400.05   11.25
   1  13   7  107.55   12.21
  -1  13  -7   75.51   11.91
  -1  14  -3  524.50   10.19
   1  14   4   85.06    8.34
  -1  14  -4  101.97    9.60
   1  14   5  288.77   13.15
  -1  14  -5  263.10   12.07
   1  14   6   34.99   11.65
  -1  14  -6   50.79    8.79
  -1  15  -4  325.05   10.15
   1  15   5   61.85   12.14
  -1  15  -5   44.04    8.07
   1  15   6  282.97   13.04
  -1  15  -6  223.20   11.03
  -1  16  -4   46.65    8.14
  -1  16  -5  160.19   10.85
  -2 -18   4  168.33   11.83
  -2 -18   3   82.63   13.68
   2 -18  -3   67.70    8.73
  -2 -18   3  102.90   16.44
   2 -18  -3   97.15   12.76
   2 -18  -3   53.77   12.22
   2 -18  -3   54.59   11.05
   2 -18  -2   89.70   10.37
   2 -18  -2  110.73   12.78
  -2 -18   2  105.69   13.35
  -2 -18   2   75.32   11.87
   2 -18  -2   92.64    9.20
   2 -18  -2   91.27   12.76
   2 -18  -1   38.85   11.86
  -2 -18   1   41.04   13.75
   2 -18  -1   75.81   11.68
  -2 -18   1   74.32   11.91
   2 -18  -1   49.82   17.29
   2 -18  -1   49.58    8.64
   2 -17  -5  153.93   10.98
  -2 -17   5   88.45   14.56
  -2 -17   5   84.89   12.47
   2 -17  -5  136.95   10.33
   2 -17  -5  109.92   11.70
   2 -17  -5  120.86   12.35
  -2 -17   4   18.80    8.61
  -2 -17   4   17.80   10.77
   2 -17  -4   24.25    7.72
   2 -17  -4   35.77   12.42
   2 -17  -4   26.90   11.14
   2 -17  -4   17.70    8.98
   2 -17  -3  185.02   13.03
  -2 -17   3  215.03   12.93
   2 -17  -3  188.88   10.17
  -2 -17   3  231.60   14.48
   2 -17  -3  196.49   12.68
   2 -17  -3  194.48    9.64
   2 -17  -2  119.20   11.02
   2 -17  -2  149.05    8.70
  -2 -17   2  144.98   11.24
   2 -17  -2  125.94   15.66
  -2 -17   2  102.97   13.26
   2 -17  -2  136.82    8.86
  -2 -17   1  400.10   14.00
   2 -17  -1  439.52   14.53
   2 -17  -1  532.51   12.99
  -2 -17   1  415.22   14.22
  -2 -17   1  345.11   22.48
   2 -17  -1  453.37   17.26
   2 -17  -1  285.48    9.99
   2 -16  -6  106.40   12.62
   2 -16  -6  117.36   10.71
   2 -16  -6   99.62    9.73
  -2 -16   6   52.50   12.08
  -2 -16   6   64.43   17.96
  -2 -16   6   60.48   17.62
   2 -16  -6   74.22   10.61
  -2 -16   5    6.81   13.07
   2 -16  -5   30.54    9.89
   2 -16  -5   50.24    8.45
  -2 -16   5   44.91   13.73
  -2 -16   5   33.31   10.59
  -2 -16   5   19.43   12.24
   2 -16  -5   57.65   12.85
   2 -16  -5   33.40   10.28
   2 -16  -4  249.26   11.37
  -2 -16   4  277.68   17.08
   2 -16  -4  245.33    9.13
   2 -16  -4  285.38   12.98
  -2 -16   4  226.89   11.02
   2 -16  -4  204.20   11.72
   2 -16  -3   81.10    9.99
  -2 -16   3  116.17   11.99
   2 -16  -3   93.68    7.25
  -2 -16   3  111.04   10.06
   2 -16  -3   88.15   13.38
   2 -16  -3  115.48    8.58
   2 -16  -2  407.69   13.80
  -2 -16   2  426.88   14.12
   2 -16  -2  463.43   12.15
  -2 -16   2  456.52   12.59
   2 -16  -2  381.94   16.07
   2 -16  -2  439.18   10.05
   2 -16  -1  194.63   10.55
   2 -16  -1  238.20    8.81
  -2 -16   1  245.43   11.69
  -2 -16   1  182.27    9.37
  -2 -16   1  139.44   15.36
   2 -16  -1  173.74   12.17
  -2 -16   1  214.51   14.75
   2 -16  -1  207.97    8.66
   2 -15  -7  141.15   12.40
  -2 -15   7  132.77   11.64
   2 -15  -7  171.80   10.91
   2 -15  -7  156.67   10.80
   2 -15  -6   88.99    9.85
   2 -15  -6   87.79    8.95
   2 -15  -6  111.97    9.82
  -2 -15   6   70.83   11.01
   2 -15  -6   70.37    9.56
   2 -15  -5  248.45    9.51
   2 -15  -5  190.93   11.65
  -2 -15   5  121.56   13.58
  -2 -15   5  172.44   13.28
  -2 -15   5  232.14   12.47
   2 -15  -5  262.04   10.04
   2 -15  -5  241.12   14.67
  -2 -15   5  263.07   15.35
   2 -15  -4  153.37    8.03
  -2 -15   4  102.50   15.41
   2 -15  -4  153.96    8.69
  -2 -15   4  145.40   10.76
   2 -15  -4  158.78   10.35
  -2 -15   4   73.97   12.70
   2 -15  -4  140.55   10.84
  -2 -15   3  127.66   14.71
   2 -15  -3  268.55    8.43
  -2 -15   3  289.49   12.45
  -2 -15   3  185.50   20.94
   2 -15  -3  271.68   10.88
   2 -15  -3  241.70   10.58
   2 -15  -3  234.01   11.61
   2 -15  -2  174.85    9.94
   2 -15  -2  188.36    7.75
  -2 -15   2  154.82   10.43
  -2 -15   2  169.30   17.49
  -2 -15   2  110.35   14.72
  -2 -15   2  200.41   12.95
   2 -15  -2  153.46    8.40
   2 -15  -2  172.92   11.24
   2 -15  -1  376.27   11.60
   2 -15  -1  354.91   13.12
   2 -15  -1  440.97   10.18
   2 -15  -1  451.48   11.87
  -2 -15   1  379.47   14.75
  -2 -15   1  429.07   16.21
  -2 -15   1  384.89   10.49
  -2 -15   1  365.27   17.46
   2 -14  -7   29.84    9.09
  -2 -14   7   31.71    9.97
   2 -14  -7   60.18   11.67
   2 -14  -7   29.37    9.58
   2 -14  -6  225.54   10.46
   2 -14  -6  169.88    9.84
  -2 -14   6  204.20   13.41
   2 -14  -6  207.51   12.05
  -2 -14   6  176.24   12.34
  -2 -14   5   49.95    7.89
   2 -14  -5  129.16    8.15
   2 -14  -5   68.85    9.68
  -2 -14   5  118.72   10.10
  -2 -14   5  109.32   13.13
   2 -14  -5  136.07    8.61
   2 -14  -5  120.41    9.72
  -2 -14   4  234.11   14.04
   2 -14  -4  338.48   11.87
   2 -14  -4  266.70   11.82
  -2 -14   4  353.18   12.03
  -2 -14   4  289.95   16.79
   2 -14  -4  333.55    9.56
   2 -14  -4  309.93   11.29
   2 -14  -3   81.46    6.44
  -2 -14   3   86.86    8.45
  -2 -14   3   62.69   15.26
   2 -14  -3   93.47    9.46
  -2 -14   3   61.71   11.84
   2 -14  -3   78.72    9.32
   2 -14  -3   78.88    8.88
   2 -14  -2  188.65    8.33
   2 -14  -2  290.82    8.23
  -2 -14   2  312.95   10.29
  -2 -14   2  280.00   16.80
  -2 -14   2  278.28   17.18
   2 -14  -2  252.57   12.32
   2 -14  -2  300.77   10.91
  -2 -14   1  143.14    9.89
   2 -14  -1   58.57    7.22
   2 -14  -1  144.20    9.28
  -2 -14   1  151.96   12.26
  -2 -14   1  147.84    8.04
  -2 -14   1  131.11   13.53
   2 -14  -1  135.49   12.36
   2 -14  -1  124.89   11.72
   2 -13  -8   26.73    9.22
   2 -13  -8   15.56    9.98
  -2 -13   8   18.16   10.11
   2 -13  -8   11.01   10.25
   2 -13  -7  183.09   11.59
   2 -13  -7  221.11   10.98
  -2 -13   7  185.25   15.26
   2 -13  -7  241.78   10.23
  -2 -13   7  221.78   12.29
   2 -13  -6  135.02    9.31
  -2 -13   6  153.66   11.64
   2 -13  -6  135.54   11.68
   2 -13  -6  190.42    9.25
  -2 -13   6  164.37   11.73
   2 -13  -5  341.77   11.09
   2 -13  -5  445.84   10.16
  -2 -13   5  454.43   11.64
  -2 -13   5  447.34   16.96
   2 -13  -5  383.12   11.27
   2 -13  -4   56.91   11.05
  -2 -13   4   89.21   11.82
   2 -13  -4  105.91    7.36
  -2 -13   4   85.12    8.83
  -2 -13   4   98.06   13.96
   2 -13  -4   87.92    9.25
   2 -13  -4   96.04   10.50
   2 -13  -3  177.29    8.33
   2 -13  -3  153.28   11.20
  -2 -13   3  149.72    8.42
  -2 -13   3  140.68   15.23
   2 -13  -3  161.53    8.90
   2 -13  -3  135.47    7.47
  -2 -13   3  141.91   11.90
   2 -13  -2   67.55    8.90
   2 -13  -2   65.28    7.71
   2 -13  -2   72.81    9.61
  -2 -13   2   66.91    9.55
  -2 -13   2   80.90   13.08
  -2 -13   2   53.60   11.52
   2 -13  -2   51.13    7.00
   2 -13  -1  331.43   10.60
   2 -13  -1  347.27   11.19
   2 -13  -1  348.59    9.05
  -2 -13   1  340.59   13.05
  -2 -13   1  309.46   10.78
   2 -13  -1  313.99   12.07
  -2 -13   1  341.51   16.91
   2 -12  -8  116.10    9.58
   2 -12  -8  112.54   10.66
   2 -12  -8  105.48   11.85
  -2 -12   8  186.67   13.71
  -2 -12   7  118.01   11.89
   2 -12  -7  110.04    9.65
   2 -12  -7  116.46   10.31
  -2 -12   7  138.19   11.93
   2 -12  -7  128.93    9.12
   2 -12  -6  112.36    8.34
   2 -12  -6  154.79    8.84
  -2 -12   6  166.43    9.97
  -2 -12   6  171.15   13.99
   2 -12  -6  169.13    8.67
   2 -12  -5   51.44    8.44
  -2 -12   5   65.02    9.24
  -2 -12   5   79.78   12.64
   2 -12  -5   87.20    9.65
   2 -12  -5  100.85   12.27
  -2 -12   4  630.55   12.89
   2 -12  -4  471.57   11.34
   2 -12  -4  705.04   13.20
  -2 -12   4  600.65   19.18
   2 -12  -4  624.46   11.89
   2 -12  -4  616.85   10.03
  -2 -12   3   62.93    8.09
   2 -12  -3   99.97   10.64
   2 -12  -3  103.50    6.76
  -2 -12   3   84.82    7.56
  -2 -12   3  104.97   14.01
   2 -12  -3   93.75    7.29
   2 -12  -3   96.49    8.57
   2 -12  -2  487.34   12.75
   2 -12  -2  519.24   12.06
   2 -12  -2  455.15    9.73
   2 -12  -2  547.04   10.36
  -2 -12   2  532.28   10.47
  -2 -12   2  530.01   18.78
  -2 -12   2  532.11   17.53
   2 -12  -1  195.66    8.22
   2 -12  -1  216.26    8.22
  -2 -12   1  227.61   11.65
  -2 -12   1  173.58    7.98
  -2 -12   1  200.45   13.74
   2 -12  -1  203.35   12.51
   2 -12  -1  185.21   10.46
   2 -11  -9  112.95   12.16
   2 -11  -9  114.23    9.49
   2 -11  -9  137.58   10.23
  -2 -11   9  120.20   11.02
   2 -11  -8  109.43    9.02
   2 -11  -8  138.07   11.44
  -2 -11   8  145.18   13.91
   2 -11  -8  125.29    9.75
  -2 -11   8  201.98   13.71
   2 -11  -7  158.43   10.53
  -2 -11   7  148.31   10.14
   2 -11  -7  167.38    9.04
  -2 -11   7  168.72   15.38
   2 -11  -7  129.28    9.48
   2 -11  -6  110.53   10.30
   2 -11  -6  176.06    9.31
  -2 -11   6  169.96    9.78
  -2 -11   6  173.05   13.07
   2 -11  -6  154.16    8.35
   2 -11  -5  338.81   10.76
   2 -11  -5  262.81    9.89
  -2 -11   5  353.22   10.00
  -2 -11   5  369.26   14.93
   2 -11  -5  358.43    9.23
   2 -11  -4   74.65    8.43
   2 -11  -4   74.35    8.06
  -2 -11   4   97.75    7.05
   2 -11  -4   52.92    6.93
  -2 -11   4   90.78   13.94
  -2 -11   3  751.79   17.81
   2 -11  -3  594.53   12.91
   2 -11  -3  856.73   14.42
   2 -11  -3  755.05   13.49
  -2 -11   3  800.56   11.80
  -2 -11   3  718.33   20.73
   2 -11  -3  738.86   13.40
   2 -11  -2  227.23    7.48
   2 -11  -2  159.65    9.24
   2 -11  -2  200.88    6.96
  -2 -11   2  203.62    7.41
  -2 -11   2  210.25   14.47
  -2 -11   2  153.53   10.81
   2 -11  -2  196.96    9.05
   2 -11  -1 1276.09   16.89
   2 -11  -1 1304.78   15.98
  -2 -11   1 1433.14   22.85
   2 -11  -1 1192.42   13.63
  -2 -11   1 1088.84   13.68
  -2 -11   1 1285.13   23.21
   2 -11  -1 1214.99   19.93
   2 -10  -9   58.29    9.09
   2 -10  -9   35.83   12.02
  -2 -10   9   59.57   10.34
  -2 -10   9   40.01   11.96
   2 -10  -9   69.51   10.73
   2 -10  -8  230.14    9.35
   2 -10  -8  238.75   10.15
  -2 -10   8  321.82   13.22
   2 -10  -8  181.31    9.58
  -2 -10   8  339.57   12.05
   2 -10  -7   82.19    9.04
   2 -10  -7   49.88    7.99
  -2 -10   7   80.71   11.53
   2 -10  -7   80.53    8.10
  -2 -10   7   94.26   12.36
   2 -10  -6  521.23   10.02
  -2 -10   6  599.72   14.59
  -2 -10   6  602.51   15.62
   2 -10  -6  543.90   11.45
  -2 -10   5  245.12   10.34
  -2 -10   5  251.68   13.98
   2 -10  -5  236.37    9.95
   2 -10  -5  275.14    8.55
   2 -10  -4 1073.29   12.78
  -2 -10   4 1043.60   19.57
   2 -10  -4 1072.56   14.19
  -2 -10   4 1026.12   13.55
   2 -10  -3  525.86    9.66
  -2 -10   3  495.34   10.85
  -2 -10   3  420.57   13.81
  -2 -10   3  455.10   17.99
   2 -10  -3  475.38   10.23
   2 -10  -3  468.83    8.93
   2 -10  -2  995.72   12.37
   2 -10  -2  981.78   13.08
  -2 -10   2  918.40   11.79
  -2 -10   2 1018.32   25.41
   2 -10  -2  833.04   14.13
   2 -10  -2 1032.21   14.58
  -2 -10   2  860.50   21.95
   2 -10  -1  444.75   10.85
   2 -10  -1  203.90    7.52
   2 -10  -1  431.19   11.62
   2 -10  -1  470.82    9.03
  -2 -10   1  513.23   15.04
  -2 -10   1  426.18   11.24
  -2 -10   1  461.08   15.25
   2  -9 -10   28.41    9.20
   2  -9 -10   34.61    9.50
   2  -9 -10   25.47   10.47
  -2  -9  10   15.39   10.67
   2  -9  -9  212.71   10.04
   2  -9  -9  309.80   10.81
  -2  -9   9  324.84   14.65
   2  -9  -9  332.96   13.62
  -2  -9   9  375.42   12.36
  -2  -9   8  164.28   12.14
   2  -9  -8  160.85    8.80
   2  -9  -8  187.89   11.53
   2  -9  -8  174.41   10.12
  -2  -9   8  200.70   10.49
   2  -9  -7  367.77   10.73
  -2  -9   7  418.93   12.74
   2  -9  -7  458.64   10.39
  -2  -9   7  425.00   12.53
  -2  -9   6  112.70    8.01
   2  -9  -6  123.42    8.00
   2  -9  -6   91.47    8.41
  -2  -9   6  127.65   10.02
  -2  -9   5  983.18   14.68
  -2  -9   5 1118.33   18.19
   2  -9  -5 1130.60   15.80
   2  -9  -5 1096.80   13.08
  -2  -9   4   84.46    9.46
   2  -9  -4  118.38    8.20
   2  -9  -4   87.92    6.97
  -2  -9   4   94.92    6.66
  -2  -9   3  819.70   11.47
   2  -9  -3  856.68   12.60
  -2  -9   3  811.77   21.61
   2  -9  -3  844.73   12.79
   2  -9  -2  480.53    9.26
   2  -9  -2  551.64   11.05
  -2  -9   2  500.45   11.25
  -2  -9   2  466.15   19.45
   2  -9  -2  510.15   10.86
  -2  -9   2  450.12   16.63
   2  -9  -1  973.71   12.35
   2  -9  -1 1025.20   13.63
  -2  -9   1 1084.16   20.50
  -2  -9   1  985.98   12.80
  -2  -9   1 1041.01   23.76
   2  -9  -1 1086.07   17.24
   2  -8 -10  128.24   10.74
   2  -8 -10  123.76   11.16
   2  -8 -10  184.41   11.27
  -2  -8  10  206.37   12.21
   2  -8  -9   71.35    9.54
   2  -8  -9   93.80    9.92
  -2  -8   9   98.44   10.46
  -2  -8   9   86.08   11.29
   2  -8  -9   77.42    8.76
  -2  -8   8  276.55   13.61
   2  -8  -8  258.00    9.94
   2  -8  -8  305.35   10.61
  -2  -8   8  290.81   10.59
   2  -8  -7   36.45   10.25
  -2  -8   7   18.29    9.02
  -2  -8   7    8.13    9.03
   2  -8  -7   -0.24    8.50
  -2  -8   6 1091.28   16.60
  -2  -8   6 1223.48   18.96
   2  -8  -6 1158.16   13.96
   2  -8  -6 1201.99   15.43
  -2  -8   5  392.03   10.04
  -2  -8   5  379.19   12.16
   2  -8  -5  397.64   10.60
   2  -8  -5  365.72    9.58
  -2  -8   4  708.27   15.10
   2  -8  -4  739.18   11.42
   2  -8  -4  755.98   10.65
  -2  -8   4  723.59   11.36
  -2  -8   3  129.02    6.93
  -2  -8   3  136.45   12.85
   2  -8  -3  139.08    7.86
   2  -8  -3  129.01    6.95
   2  -8  -2  361.18    8.19
   2  -8  -2 1531.65   16.14
  -2  -8   2 1336.90   14.50
  -2  -8   2 1256.59   33.60
   2  -8  -2 1450.12   18.30
  -2  -8   2 1260.06   29.11
   2  -8  -1  565.46   11.82
   2  -8  -1  495.69    8.91
   2  -8  -1  570.76   10.88
  -2  -8   1  577.52   16.26
  -2  -8   1  541.74   12.02
  -2  -8   1  539.20   19.28
   2  -7 -10   -4.41    8.13
  -2  -7  10   37.23   11.91
   2  -7 -10   21.49    8.82
   2  -7 -10   12.50   10.40
  -2  -7  10   29.80   10.35
  -2  -7   9  201.12   10.77
   2  -7  -9  215.89   12.14
   2  -7  -9  244.92   10.80
  -2  -7   9  252.47   12.90
   2  -7  -8  110.77    8.41
   2  -7  -8  121.22   10.99
  -2  -7   8  140.98   10.12
  -2  -7   8  125.56   10.13
   2  -7  -7  238.49    9.23
  -2  -7   7  226.96    9.21
   2  -7  -7  206.91    9.60
  -2  -7   7  263.89   12.73
  -2  -7   6   40.54    7.48
   2  -7  -6   28.27    7.30
  -2  -7   6   45.68    9.30
   2  -7  -6   41.74    9.74
  -2  -7   5  732.25   13.25
  -2  -7   5  699.87   13.49
   2  -7  -5  719.43   10.85
   2  -7  -5  707.53   11.29
  -2  -7   4  231.93   10.09
  -2  -7   4  231.56    7.65
   2  -7  -4  237.75    7.32
   2  -7  -4  236.99    7.85
   2  -7  -3 1002.67   14.19
  -2  -7   3  831.57   11.58
  -2  -7   3  896.46   19.91
   2  -7  -3  994.76   11.98
   2  -7  -2  525.26    9.18
   2  -7  -2  615.47    9.79
  -2  -7   2  523.85    9.78
  -2  -7   2  498.21   27.32
   2  -7  -2  587.07   11.29
  -2  -7   2  513.11   22.38
   2  -7  -1  815.33   10.72
   2  -7  -1  944.71   14.78
   2  -7  -1  917.29   11.39
  -2  -7   1  909.68   22.24
  -2  -7   1  851.50   11.92
  -2  -7   1  801.87   27.23
   2  -6 -10  135.75    9.44
   2  -6 -10  138.96    9.95
  -2  -6  10  157.50   11.11
  -2  -6  10  208.91   13.21
   2  -6 -10  185.20   11.13
  -2  -6   9  112.57    9.45
   2  -6  -9  110.35    8.76
   2  -6  -9  124.47    9.76
  -2  -6   9  163.23   10.25
   2  -6  -8  210.29    9.05
   2  -6  -8  276.10   10.46
  -2  -6   8  273.78   11.92
  -2  -6   8  255.85   11.31
   2  -6  -7   49.93   10.70
  -2  -6   7   61.97    7.78
   2  -6  -7   79.36    8.19
  -2  -6   7   57.71    9.31
  -2  -6   6  219.30    8.72
   2  -6  -6  188.76   11.47
   2  -6  -6  210.37    8.82
  -2  -6   6  192.06    9.23
   2  -6  -5  550.41    9.74
   2  -6  -5  583.63    9.77
  -2  -6   5  582.00   11.35
  -2  -6   5  569.13   12.56
  -2  -6   4  307.95    8.67
  -2  -6   4  306.88   11.45
   2  -6  -4  281.47    7.84
   2  -6  -4  290.20    8.50
  -2  -6   3  188.12    9.55
  -2  -6   3  197.74   12.85
   2  -6  -3  194.91    7.41
   2  -6  -3  198.86    7.07
   2  -6  -2  615.59    9.78
   2  -6  -2 3154.92   28.52
   2  -6  -2 3338.60   27.59
  -2  -6   2 2952.52   23.52
   2  -6  -1  940.07   14.93
   2  -6  -1  935.78   11.65
  -2  -6   1  921.87   32.37
  -2  -6   1  899.44   13.77
   2  -6  -1  777.19   10.62
   2  -5 -10   27.87    8.85
  -2  -5  10   54.54   11.13
   2  -5 -10   32.10   10.56
  -2  -5  10   67.52   10.47
  -2  -5   9  160.45    9.36
   2  -5  -9  124.32    8.96
   2  -5  -9  187.15   10.22
  -2  -5   9  189.63   12.55
   2  -5  -8   91.45    8.69
   2  -5  -8   78.70    9.52
  -2  -5   8   74.91    9.22
  -2  -5   8   61.56    8.19
   2  -5  -7  490.88   10.45
  -2  -5   7  563.93   12.90
   2  -5  -7  575.62   10.43
  -2  -5   7  615.86   12.51
   2  -5  -6  200.90    8.64
  -2  -5   6  168.73    7.72
   2  -5  -6  180.59    9.03
  -2  -5   6  181.40    8.98
   2  -5  -5 1264.09   14.32
  -2  -5   5 1266.90   16.32
  -2  -5   5 1263.40   17.18
   2  -5  -5 1242.73   13.07
   2  -5  -4 1178.39   13.27
   2  -5  -4 1223.12   13.32
  -2  -5   4 1276.18   15.97
  -2  -5   4 1168.99   18.27
  -2  -5   3  464.62    9.72
   2  -5  -3  486.65   10.97
  -2  -5   3  428.18   13.54
   2  -5  -3  466.28   10.61
   2  -5  -2 2583.31   25.02
  -2  -5   2 2408.86   21.38
   2  -5  -2 2493.15   22.57
   2  -5  -1 2683.96   23.85
   2  -5  -1 3075.80   31.35
  -2  -5   1 2752.85   23.33
   2  -4 -11   25.29   10.52
   2  -4 -11   51.47    9.36
   2  -4 -11   47.42   10.63
  -2  -4  11   80.66    9.85
  -2  -4  10  190.41   11.28
   2  -4 -10  130.74   10.51
  -2  -4  10  191.83   12.33
   2  -4 -10  175.77   12.31
  -2  -4   9   96.02    8.06
   2  -4  -9   54.03   10.50
   2  -4  -9  103.75    9.82
  -2  -4   9  123.87   10.37
  -2  -4   8 1177.12   14.67
   2  -4  -8 1039.71   14.93
  -2  -4   8 1095.50   15.43
   2  -4  -8 1140.74   16.29
   2  -4  -7  336.99    9.92
  -2  -4   7  351.77    9.84
   2  -4  -7  319.42    9.84
  -2  -4   7  332.28   10.85
   2  -4  -6  813.69   11.73
  -2  -4   6  852.18   14.02
   2  -4  -6  402.04   10.30
  -2  -4   6  840.40   13.06
   2  -4  -5  279.04    8.11
  -2  -4   5  270.28    9.01
  -2  -4   5  305.33   13.09
   2  -4  -5  271.10    8.33
   2  -4  -4 1572.51   15.98
  -2  -4   4 1588.24   18.98
  -2  -4   4 1413.43   19.30
   2  -4  -4 1515.28   14.89
   2  -4  -3  319.77    8.33
  -2  -4   3  305.44   11.55
  -2  -4   3  288.90    8.80
   2  -4  -3  315.40    7.98
  -2  -4   2 2161.03   40.60
   2  -4  -2 2155.63   20.96
  -2  -4   2 2057.12   20.15
   2  -4  -2 2218.45   22.61
   2  -4  -1  297.60    7.77
   2  -4  -1  287.56    8.76
  -2  -4   1  274.27    8.42
   2  -3 -11  123.04    9.59
   2  -3 -11  125.92   10.62
   2  -3 -11  138.91   12.71
  -2  -3  11  155.68   10.54
  -2  -3  10  113.11   11.29
   2  -3 -10   82.57   10.24
   2  -3 -10  119.81   10.45
  -2  -3  10  142.83   10.12
  -2  -3   9  275.81    9.58
   2  -3  -9  291.12   12.16
   2  -3  -9  279.83   10.71
  -2  -3   9  296.19   10.51
   2  -3  -8  163.65    9.56
   2  -3  -8  175.31   12.37
  -2  -3   8  173.15    8.71
  -2  -3   8  162.54    8.63
   2  -3  -7 1550.39   17.08
  -2  -3   7 1494.94   17.41
   2  -3  -7 1722.37   16.91
  -2  -3   7 1581.73   17.59
   2  -3  -6  194.96    7.91
  -2  -3   6  226.04    8.07
   2  -3  -6  181.42    8.53
  -2  -3   6  211.86    9.07
  -2  -3   5 2643.28   25.95
   2  -3  -5 2489.05   20.43
   2  -3  -5 2531.93   20.23
  -2  -3   5 2449.99   24.09
   2  -3  -4  265.81    7.58
  -2  -3   4  279.47    8.78
  -2  -3   4  254.66    9.92
   2  -3  -4  278.08    7.98
   2  -3  -3 2753.86   23.71
  -2  -3   3 2832.58   27.67
  -2  -3   3 2769.56   32.36
   2  -3  -3 2815.74   24.04
  -2  -3   2  746.31   19.78
   2  -3  -2  706.48   11.46
  -2  -3   2  719.23   11.77
   2  -3  -2  764.17   12.53
  -2  -3   1 1847.54   37.50
   2  -3  -1 1802.97   19.31
  -2  -3   1 1681.34   17.74
   2  -3  -1 1824.20   22.43
   2  -2 -11   35.18   10.95
   2  -2 -11    9.44    9.80
  -2  -2  11   28.33    9.92
  -2  -2  10  221.03   11.42
   2  -2 -10  203.02   11.87
   2  -2 -10  212.54   11.50
  -2  -2  10  242.50   12.74
   2  -2  -9  155.45   11.90
   2  -2  -9  135.17    9.44
  -2  -2   9  134.94    8.82
  -2  -2   9  180.47   12.49
   2  -2  -8 1007.11   15.93
  -2  -2   8 1001.13   16.17
   2  -2  -8  739.58   12.48
  -2  -2   8 1034.59   15.15
  -2  -2   7  116.20    7.44
   2  -2  -7  125.58   11.53
   2  -2  -7  129.82    9.77
  -2  -2   7  161.82    8.91
   2  -2  -6 1064.33   13.72
  -2  -2   6 1056.22   14.22
   2  -2  -6 1146.77   13.71
  -2  -2   6 1098.92   16.75
   2  -2  -5  223.61    7.89
   2  -2  -5  219.39    8.40
  -2  -2   5  200.90    9.23
  -2  -2   5  238.81   10.82
  -2  -2   4 3170.08   28.94
   2  -2  -4 3113.12   24.64
   2  -2  -4 2960.44   24.06
  -2  -2   4 2929.43   28.57
   2  -2  -3  389.02    9.04
  -2  -2   3  413.50    9.83
  -2  -2   3  379.39   10.26
   2  -2  -3  430.42    9.46
  -2  -2   2 1678.04   25.99
  -2  -2   2 1825.60   20.57
   2  -2  -2 1746.03   19.95
   2  -2  -2 1742.27   19.88
  -2  -2   1  234.23   11.31
   2  -2  -1  228.78    7.24
  -2  -2   1  229.40    8.09
   2  -2  -1  236.16    8.53
   2  -1 -11  282.34   11.13
   2  -1 -11  208.80   12.53
  -2  -1  11  251.30   11.50
  -2  -1  10   99.70    8.71
   2  -1 -10   82.64   10.18
   2  -1 -10  103.37    9.77
  -2  -1  10   89.17    9.22
   2  -1  -9  150.27   10.22
   2  -1  -9  143.14    9.40
  -2  -1   9  137.95    8.72
  -2  -1   9  172.53    9.75
   2  -1  -8  187.51    8.91
  -2  -1   8  164.37    8.54
   2  -1  -8  187.84   10.00
  -2  -1   8  181.28   11.93
  -2  -1   7  480.95   10.20
   2  -1  -7  534.01   11.16
   2  -1  -7  467.73   11.66
  -2  -1   7  524.56   11.02
  -2  -1   6  264.72   10.06
   2  -1  -6  292.22    9.16
   2  -1  -6  281.63   11.83
  -2  -1   6  286.41    9.73
   2  -1  -5  450.91    9.31
   2  -1  -5  476.19   10.10
  -2  -1   5  543.64   12.32
  -2  -1   5  493.35   10.73
  -2  -1   4  111.06    9.04
   2  -1  -4  111.29    8.58
   2  -1  -4   85.81    7.18
  -2  -1   4  105.62    7.67
  -2  -1   3 3686.65   33.69
   2  -1  -3 3847.69   32.91
   2  -1  -3 3673.08   32.15
  -2  -1   3 3253.65   32.89
   2  -1  -2 1201.62   16.68
  -2  -1   2 1138.53   19.49
   2  -1  -2 1127.55   15.53
  -2  -1   2 1162.61   16.13
   2  -1  -1 1702.88   21.89
  -2  -1   1 1958.29   26.85
   2  -1  -1 1950.29   22.35
  -2  -1   1 2032.34   22.72
   2   0 -11    5.19    9.99
   2   0 -11   30.74   11.32
   2   0 -10  231.31   11.68
   2   0 -10  151.25   10.88
   2   0  -9   66.43   12.23
   2   0  -9   98.04   11.80
   2   0  -8  266.18   11.02
   2   0  -8  236.43   10.72
   2   0  -7  100.59    7.80
   2   0  -7  112.04    9.62
   2   0  -6  458.35   10.40
   2   0  -6  409.89   10.73
   2   0  -5 1087.36   13.85
   2   0  -5 1114.36   14.44
   2   0  -4 1766.69   18.33
   2   0  -4 1753.27   19.14
   2   0  -3 2340.78   23.31
   2   0  -3 2252.95   24.11
   2   0  -2   69.92    6.89
   2   0  -2   63.36    6.14
   2   0  -1   41.59    6.67
   2   0  -1   45.89    7.36
   2   0   0  858.60   14.11
   2   0   0  780.43   14.44
   2   0   1 3239.42   29.11
   2   0   1 3291.65   31.79
   2   0   2 2715.45   27.72
   2   0   2 2741.86   25.44
   2   0   3  692.04   11.89
   2   0   4 1981.81   18.82
   2   0   5  782.44   13.51
   2   0   6  285.55   11.76
   2   0   7   27.97    9.79
   2   0   8  225.34   10.03
   2   0   9   40.16   13.17
  -2   1   0 2323.33   26.84
  -2   1   0 2240.16   22.56
   2   1   0 1880.72   23.23
   2   1   0 1971.61   21.11
   2   1   1 1070.29   15.59
  -2   1  -1 1068.74   14.39
   2   1   1  887.50   14.93
   2   1   2 1239.57   16.77
  -2   1  -2 1156.73   14.38
   2   1   2 1082.70   15.99
  -2   1  -3 1983.07   18.65
  -2   1  -3 2088.54   24.48
   2   1   3 1841.94   18.93
  -2   1  -4 1064.71   13.98
  -2   1  -4 1126.72   16.89
   2   1   4  955.70   13.90
  -2   1  -4 1041.27   15.64
  -2   1  -5  859.48   16.79
  -2   1  -5  624.18   12.81
   2   1   5  729.86   13.17
  -2   1  -5  725.53   15.54
  -2   1  -6   60.38    9.32
  -2   1  -6   68.19    9.04
   2   1   6   31.88    8.87
  -2   1  -6   31.60   11.21
  -2   1  -7  590.46   12.48
   2   1   7  494.21   11.76
  -2   1  -7  543.73   15.09
  -2   1  -7  435.61   13.72
  -2   1  -8   96.10   11.49
  -2   1  -8   94.31   10.71
   2   1   8   91.21    9.09
  -2   1  -8   59.55   10.49
  -2   1  -9  166.92   13.19
  -2   1  -9  178.25   10.69
  -2   1  -9   94.87   13.30
   2   1   9  162.46   13.05
  -2   2   0  560.86    9.79
   2   2   0  539.11   14.61
   2   2   0  537.36   10.85
  -2   2  -1 4243.41   42.22
  -2   2  -1 4368.61   31.92
   2   2   1 4101.28   38.96
   2   2   1 4384.18   34.04
   2   2   2 2193.80   21.64
  -2   2  -2 2372.77   20.46
  -2   2  -2 2190.14   26.83
   2   2   2 2292.37   24.44
  -2   2  -3   52.15    8.17
   2   2   3   35.46    8.87
  -2   2  -3   61.32   10.61
  -2   2  -3   62.66    7.82
  -2   2  -4  696.96   12.14
   2   2   4  657.53   12.34
  -2   2  -4  771.48   16.08
   2   2   5  379.27   11.43
  -2   2  -5  437.49   11.66
  -2   2  -5  399.63   12.02
  -2   2  -6  993.79   14.15
  -2   2  -6 1044.29   18.87
   2   2   6  937.26   15.46
  -2   2  -7  246.55   12.70
  -2   2  -7  263.92   13.53
   2   2   7  218.33   10.34
  -2   2  -8  304.03   14.18
  -2   2  -8  341.27   12.25
   2   2   8  283.71   10.74
  -2   2  -9   35.14   13.86
  -2   2  -9   39.23   10.65
  -2   2  -9   58.80   15.72
   2   2   9   30.41   11.34
  -2   3   0  676.19   10.34
   2   3   0  777.63   20.65
   2   3   0  841.60   13.23
  -2   3  -1 1369.46   14.61
  -2   3  -1 1371.29   24.46
   2   3   1 1216.72   20.17
   2   3   1 1392.78   16.61
   2   3   2  344.91    9.52
   2   3   2  323.90   11.90
  -2   3  -2  358.22    8.87
  -2   3  -2  329.73   13.22
  -2   3  -3 1279.92   14.53
  -2   3  -3 1338.91   23.18
  -2   3  -3 1123.37   19.88
   2   3   3 1244.28   18.39
  -2   3  -4  222.82    9.89
  -2   3  -4  199.61    9.28
   2   3   4  189.06    9.79
  -2   3  -4  190.27    9.41
   2   3   5 1252.46   15.89
  -2   3  -5 1447.89   16.76
  -2   3  -5 1302.02   21.09
  -2   3  -5 1495.81   23.87
  -2   3  -6  275.01   12.05
  -2   3  -6  320.20   11.61
  -2   3  -6  243.86   11.33
   2   3   6  285.94   10.96
  -2   3  -7  406.63   14.27
  -2   3  -7  477.65   12.08
   2   3   7  359.11   10.65
  -2   3  -7  316.42   14.54
  -2   3  -8   98.06   13.75
  -2   3  -8  115.12   14.17
   2   3   8   76.40   10.24
  -2   3  -8  105.71   15.61
  -2   3  -9  187.97   17.81
  -2   3  -9  170.21   11.47
  -2   3  -9  128.98   12.25
   2   3   9  133.55   10.69
  -2   4   0 5236.97   55.31
  -2   4   0 4957.12   37.08
   2   4   0 3990.56   47.11
   2   4   0 4842.52   35.00
  -2   4  -1 1165.49   12.98
  -2   4  -1 1008.52   22.17
   2   4   1 1114.21   19.76
   2   4   1 1147.97   14.29
   2   4   2 2997.32   24.79
  -2   4  -2 1734.10   31.80
  -2   4  -2 2778.03   21.59
  -2   4  -2 2583.83   43.79
   2   4   2 2659.04   27.56
  -2   4  -3  785.09   11.98
  -2   4  -3  615.81   17.13
  -2   4  -3  668.99   17.66
   2   4   3  750.43   16.17
  -2   4  -4  657.68   11.82
  -2   4  -4  558.27   15.56
   2   4   4  659.56   16.47
  -2   4  -4  681.56   18.05
  -2   4  -5   36.84   12.23
  -2   4  -5   24.21   10.45
  -2   4  -5   27.55   11.15
   2   4   5   13.68    9.72
  -2   4  -6  819.40   19.41
  -2   4  -6  717.41   13.41
  -2   4  -6  740.68   18.77
   2   4   6  800.24   13.62
  -2   4  -7  186.66   13.15
  -2   4  -7  172.93   13.15
  -2   4  -7  136.76   13.87
   2   4   7  193.14   10.06
  -2   4  -8  306.03   12.09
  -2   4  -8  323.02   19.30
  -2   4  -8  232.07   17.11
   2   4   8  300.35   13.48
  -2   4  -9   18.61   10.40
  -2   4  -9   23.28   14.06
  -2   4  -9   -0.55   10.19
   2   4   9   34.35    9.81
  -2   5   0 1186.91   13.24
  -2   5   0 1266.76   22.60
   2   5   0 1267.24   16.70
   2   5   0 1200.57   21.86
   2   5   1 2077.82   18.93
  -2   5  -1 2288.14   42.51
  -2   5  -1 2020.11   17.26
   2   5   1 2201.63   26.48
   2   5   2  505.08   10.29
  -2   5  -2  504.67    9.19
   2   5   2  542.61   15.97
   2   5   3 1761.75   21.76
  -2   5  -3 1605.62   15.93
  -2   5  -4  506.89   10.91
  -2   5  -4  535.08   20.69
  -2   5  -4  411.76   17.94
   2   5   4  482.66   12.47
  -2   5  -5 1310.66   28.74
  -2   5  -5 1302.80   16.22
  -2   5  -5 1023.99   22.19
   2   5   5 1086.13   15.02
  -2   5  -6  227.52   11.80
  -2   5  -6  240.96   15.86
  -2   5  -6  187.65   13.68
   2   5   6  237.78   13.87
  -2   5  -7  286.48   11.32
  -2   5  -7  236.32   17.10
  -2   5  -7  191.97   15.68
   2   5   7  201.44   10.05
  -2   5  -8   39.60   10.49
  -2   5  -8   35.79   14.15
  -2   5  -8   46.71   15.65
   2   5   8   63.34   10.72
   2   5   9   61.63   10.34
  -2   5  -9  100.45   11.83
  -2   5  -9   45.57   12.74
  -2   5  -9   87.56   22.64
  -2   6   0 1264.96   13.52
  -2   6   0 1375.62   22.47
   2   6   0 1333.69   16.26
   2   6   0 1188.51   20.69
   2   6   1 1520.02   15.74
  -2   6  -1 1562.95   14.64
   2   6   1 1574.34   21.46
   2   6   2 1964.00   17.86
  -2   6  -2 2198.00   18.20
   2   6   2 2133.63   23.27
   2   6   3  720.01   15.34
  -2   6  -3  719.25   11.07
   2   6   4  392.18   11.47
  -2   6  -4  443.34   12.09
   2   6   5  238.14   10.88
  -2   6  -5  221.48   10.15
  -2   6  -6  550.70   13.24
  -2   6  -6  365.74   21.43
   2   6   6  473.23   12.98
  -2   6  -6  584.20   27.63
  -2   6  -7   72.33   10.11
  -2   6  -7   29.89   15.59
   2   6   7   33.50    9.56
  -2   6  -7   58.99   18.21
  -2   6  -8  176.41   24.77
  -2   6  -8  250.35   12.09
  -2   6  -8   97.76   17.67
   2   6   8  261.17   11.53
  -2   6  -9   56.30   11.91
  -2   6  -9    8.15   14.51
   2   6   9   57.22   10.10
  -2   7   0  702.14    9.92
  -2   7   0  778.58   16.36
   2   7   0  643.74   14.10
   2   7   0  682.47   11.34
   2   7   1  324.91    9.29
  -2   7  -1  335.34    7.70
   2   7   1  329.32   10.42
  -2   7  -2  396.44    8.31
   2   7   2  445.50   11.30
  -2   7  -3  713.43   12.53
   2   7   3  715.67   15.24
  -2   7  -4  698.21   11.65
   2   7   4  635.66   12.62
   2   7   5  515.83   12.45
  -2   7  -5  519.07   11.47
  -2   7  -6  142.53   10.52
   2   7   6  102.25   10.33
   2   7   7  311.40   11.36
  -2   7  -7  301.21   13.97
  -2   7  -8  162.14   13.90
   2   7   8  140.50   10.64
   2   8   0  430.28   12.13
  -2   8   0  518.94   10.30
   2   8   0  479.64   10.20
   2   8   1   21.97    8.43
   2   8   1   23.20    9.54
  -2   8  -1   42.51    7.58
  -2   8  -2  653.90    9.92
   2   8   2  725.38   13.27
   2   8   3  305.60   11.70
  -2   8  -3  283.28    8.01
  -2   8  -4 1017.63   13.68
   2   8   4  981.95   15.57
   2   8   5  424.23   11.50
  -2   8  -5  433.62   10.69
  -2   8  -6  179.36   11.14
   2   8   6  232.60   11.33
  -2   8  -7  157.80   11.63
   2   8   7  194.66   14.03
  -2   8  -8  303.00   12.53
   2   8   8  284.87   12.63
   2   9   0   60.76    8.05
  -2   9   0   55.41    6.29
   2   9   1 1628.00   24.09
   2   9   1 1541.27   16.18
  -2   9  -1 1670.86   15.69
  -2   9  -2  407.27    8.46
   2   9   2  396.47   10.23
  -2   9  -3  745.90   10.86
   2   9   3  724.37   13.12
  -2   9  -4  175.64    8.56
   2   9   4  165.56    9.53
   2   9   5  497.16   12.34
  -2   9  -5  522.57   10.65
  -2   9  -6   57.83   10.00
   2   9   6   22.25   10.89
  -2   9  -7  299.66   13.01
   2   9   7  311.10   12.55
  -2   9  -8   59.14   11.13
   2   9   8   61.56   11.46
   2  10   0 1077.09   13.93
   2  10   1  389.40   10.14
  -2  10  -1  432.36    8.54
   2  10   2 1628.61   24.54
  -2  10  -2 1570.27   14.97
  -2  10  -3   19.58    7.30
   2  10   3   13.95    8.69
   2  10   4  931.13   15.52
  -2  10  -4  942.85   14.20
  -2  10  -5  133.77    9.08
   2  10   5  120.47   12.39
  -2  10  -6  330.24   11.51
   2  10   6  331.34   12.38
  -2  10  -7   24.16   11.00
   2  10   7   47.33   11.15
  -2  10  -8  162.67   14.05
   2  10   8  151.81   14.18
   2  11   0  263.62    9.06
  -2  11  -1 1466.49   15.14
   2  11   2  758.73   15.55
  -2  11  -2  807.51   11.39
   2  11   3  341.27   10.56
  -2  11  -3  326.63    9.83
  -2  11  -4   55.59    7.49
   2  11   4   95.58    8.99
   2  11   5  551.43   13.20
  -2  11  -5  595.40   13.17
   2  11   6   11.12   10.89
  -2  11  -6   34.32    9.28
  -2  11  -7  156.09   10.93
   2  11   7  141.28   12.31
  -2  12  -2  192.17    7.81
   2  12   2  184.72   10.23
  -2  12  -3  221.16    7.90
   2  12   3  219.11    9.75
   2  12   4  557.60   13.28
  -2  12  -4  535.52   10.25
  -2  12  -5   64.73   10.64
   2  12   5   92.66   10.52
   2  12   6  285.41   12.49
  -2  12  -6  214.50   10.46
   2  12   7   90.07   12.72
  -2  12  -7   61.80   10.72
  -2  13  -2  245.83    7.97
  -2  13  -3  233.42    8.03
   2  13   3  280.56   13.73
   2  13   4  262.20   11.05
  -2  13  -4  208.80    8.75
   2  13   5  351.02   13.12
  -2  13  -5  341.50    9.59
   2  13   6  153.58   12.43
  -2  13  -6  135.58    9.97
   2  14   3  110.10    9.36
  -2  14  -3   98.99    7.81
   2  14   4  269.07   12.00
  -2  14  -4  229.72    8.61
   2  14   5  113.66   13.49
  -2  14  -5   84.96    8.78
   2  14   6  163.65   13.09
  -2  14  -6  161.49    9.90
  -2  15  -3  407.06    9.72
   2  15   4  119.91   11.73
  -2  15  -4   95.52    8.22
   2  15   5  205.22   13.08
  -2  15  -5  170.39    9.82
  -2  16  -4  239.13   11.13
  -3 -18   3   25.69   11.40
   3 -18  -3   61.88   12.27
   3 -18  -3   65.24    7.73
   3 -18  -3   48.09    9.07
   3 -18  -3   52.33   15.78
  -3 -18   3   66.60   14.75
   3 -18  -2   67.35    8.74
  -3 -18   2   58.69   10.33
  -3 -18   2   63.20   13.04
   3 -18  -2   40.75    9.72
   3 -18  -2   58.20   14.03
   3 -18  -2   56.37    8.83
   3 -18  -1  120.80   11.98
  -3 -18   1  114.65   17.17
  -3 -18   1   92.21   10.43
   3 -18  -1   71.96    9.73
   3 -18  -1   74.10   12.82
   3 -18  -1   84.92    9.28
   3 -17  -5   71.62    8.41
   3 -17  -5   53.33   10.91
  -3 -17   5   57.72   13.31
  -3 -17   5   39.08    9.07
   3 -17  -5   58.72    9.81
   3 -17  -5   62.65   11.65
  -3 -17   4  133.37   10.39
   3 -17  -4  164.73    8.56
   3 -17  -4  100.57   11.02
  -3 -17   4  118.12   14.07
   3 -17  -4  154.69    9.73
   3 -17  -4  109.15   12.32
   3 -17  -3  205.22   15.55
  -3 -17   3  281.56   13.27
   3 -17  -3  231.38    9.37
   3 -17  -3  186.92   11.20
  -3 -17   3  255.44   14.47
   3 -17  -3  243.93   10.17
  -3 -17   2  120.53   13.07
   3 -17  -2  114.08    8.37
   3 -17  -2  114.47   12.38
  -3 -17   2  129.52   10.17
   3 -17  -2   94.75   13.44
   3 -17  -2  103.90    9.20
   3 -17  -1   49.64    8.26
   3 -17  -1  152.51   12.54
  -3 -17   1  124.48   11.66
   3 -17  -1   97.61    9.28
   3 -17  -1   94.86   16.78
  -3 -17   1  121.24   11.59
   3 -16  -6  184.51    8.95
   3 -16  -6  125.99   12.48
   3 -16  -6  145.36   10.84
  -3 -16   6  131.79   10.75
   3 -16  -6  198.06    9.72
   3 -16  -5   97.18    7.79
   3 -16  -5   86.82    9.98
   3 -16  -5   90.38   12.56
   3 -16  -5   95.95    9.11
  -3 -16   5   62.38    8.64
  -3 -16   4  141.80   11.56
   3 -16  -4  134.56   12.41
   3 -16  -4  127.46    8.23
   3 -16  -4  131.58   11.32
   3 -16  -4  135.96    9.68
   3 -16  -3  143.34    8.80
   3 -16  -3  125.61    9.68
   3 -16  -3  167.93    7.75
  -3 -16   3  172.54   10.15
   3 -16  -3  102.58   13.83
   3 -16  -2  193.05   13.25
   3 -16  -2  247.68   10.35
   3 -16  -2  238.16   11.21
  -3 -16   2  265.67   11.87
   3 -16  -2  100.34    8.31
   3 -16  -1  301.88    9.58
   3 -16  -1  346.86   11.54
   3 -16  -1  258.80   12.45
  -3 -16   1  232.27    9.74
  -3 -16   1  280.76   12.38
   3 -16  -1  289.57   15.40
  -3 -15   7    1.43   12.36
   3 -15  -7   92.51    8.85
   3 -15  -7   66.07   12.30
  -3 -15   7   27.66   14.99
   3 -15  -7   59.05   10.69
   3 -15  -7   49.79   10.61
   3 -15  -6  150.03   10.21
   3 -15  -6  130.29   10.17
   3 -15  -6  124.27    9.88
  -3 -15   6  121.49   11.19
   3 -15  -6   88.64    9.09
   3 -15  -5  121.13   11.10
   3 -15  -5  179.76    8.81
   3 -15  -5  156.11   10.88
   3 -15  -5   68.15    8.94
  -3 -15   5  142.75    8.90
   3 -15  -4  116.69   12.41
   3 -15  -4  105.89   10.31
  -3 -15   4  129.44    9.17
   3 -15  -4  133.70    9.91
   3 -15  -4  133.64    9.67
   3 -15  -3  222.01    8.31
   3 -15  -3  229.76    9.98
  -3 -15   3  239.76   11.60
   3 -15  -3  251.05    9.49
   3 -15  -3  175.50   13.07
   3 -15  -2  353.55   12.18
   3 -15  -2  286.49   14.71
   3 -15  -2  263.97    8.76
   3 -15  -2  290.79   10.06
  -3 -15   2  285.49    9.77
   3 -15  -1  206.17    8.22
   3 -15  -1  206.13   13.46
   3 -15  -1  243.61   10.51
   3 -15  -1  183.75   10.35
  -3 -15   1  192.82    9.05
  -3 -14   8   23.80   11.04
   3 -14  -7   87.72   12.12
  -3 -14   7  208.85   11.83
   3 -14  -7  200.92   11.06
   3 -14  -7  226.71    9.88
  -3 -14   7  170.82   13.83
   3 -14  -6   46.78    9.30
   3 -14  -6  107.39    8.57
   3 -14  -6   71.77    9.86
  -3 -14   6   85.83    8.85
   3 -14  -6   80.75    8.70
   3 -14  -5  183.05   10.94
   3 -14  -5  254.55    9.20
   3 -14  -5  264.69   13.01
  -3 -14   5  264.49   11.46
   3 -14  -5  309.10    9.68
   3 -14  -4   91.48    9.84
  -3 -14   4  151.30    8.83
   3 -14  -4  174.60    7.69
   3 -14  -4  125.90    9.52
   3 -14  -4   91.31    8.36
   3 -14  -3  247.02   10.25
   3 -14  -3  282.43   10.12
  -3 -14   3  298.71    9.46
   3 -14  -3  278.49   12.74
   3 -14  -3  331.97    9.39
   3 -14  -2  225.10    8.92
   3 -14  -2  195.89   13.98
   3 -14  -2  214.29    7.98
   3 -14  -2  233.44   10.54
  -3 -14   2  227.96   10.24
   3 -14  -1  132.40    9.46
   3 -14  -1  181.27    9.41
   3 -14  -1  175.78   11.34
  -3 -14   1  123.51    9.59
   3 -14  -1  173.42   16.01
   3 -13  -8  132.53    9.75
  -3 -13   8  134.80   11.72
   3 -13  -8  152.34   10.41
  -3 -13   8  176.26   13.32
   3 -13  -8  153.59   10.06
   3 -13  -7   87.14    8.82
  -3 -13   7   96.32   11.52
   3 -13  -7   74.66    9.40
   3 -13  -7  110.05    8.37
  -3 -13   7   69.78   10.62
   3 -13  -6  139.48    9.03
   3 -13  -6  248.23    8.97
   3 -13  -6  221.55   11.32
   3 -13  -6  204.17    8.95
  -3 -13   6  223.80   10.04
  -3 -13   6  148.44   13.73
   3 -13  -5   30.24   10.73
   3 -13  -5   54.83    7.47
   3 -13  -5   82.87    9.06
   3 -13  -5   71.60   10.00
  -3 -13   5   49.30    9.14
   3 -13  -4  162.64    9.25
  -3 -13   4  211.96    8.82
   3 -13  -4  208.59   11.69
   3 -13  -4  247.53    8.28
   3 -13  -4  196.70    8.46
   3 -13  -3  142.33   11.37
   3 -13  -3  154.70    6.86
   3 -13  -3  154.75    9.28
  -3 -13   3  175.53    8.51
   3 -13  -3  167.52    7.52
   3 -13  -2  421.88   13.36
   3 -13  -2  549.51   14.83
   3 -13  -2  514.33    9.55
  -3 -13   2  504.10   10.19
   3 -13  -2  523.64    9.62
   3 -13  -1  146.36    7.24
   3 -13  -1  161.58    8.74
   3 -13  -1  156.61    9.08
  -3 -13   1  149.09    7.52
   3 -13  -1  145.01   11.33
   3 -12  -9  106.90   11.04
   3 -12  -9   99.61   10.28
   3 -12  -9  179.95   10.82
  -3 -12   9  139.79   11.04
   3 -12  -8  102.65   11.19
   3 -12  -8  105.60    9.92
  -3 -12   8  128.57   11.90
   3 -12  -8  100.42   11.12
  -3 -12   8  117.99   10.47
  -3 -12   7  100.12   10.76
   3 -12  -7   88.62    9.29
   3 -12  -7   77.77    8.54
   3 -12  -7   48.44    7.81
  -3 -12   7   86.65   11.10
   3 -12  -6  138.71   10.73
  -3 -12   6  126.21    8.77
   3 -12  -6  124.14    9.52
  -3 -12   6  117.27   12.67
  -3 -12   5  102.12   13.57
   3 -12  -5  220.68    8.43
   3 -12  -5  216.32    9.96
  -3 -12   5  225.70    8.59
   3 -12  -5  234.50    8.33
  -3 -12   5  235.20   18.39
  -3 -12   4  227.85    8.13
   3 -12  -4  218.26   10.86
   3 -12  -4  237.17    9.23
   3 -12  -4  216.34    8.18
   3 -12  -3  209.99    9.03
   3 -12  -3  209.71    7.18
   3 -12  -3  204.30    9.57
  -3 -12   3  212.43    8.24
   3 -12  -2  200.33   10.58
   3 -12  -2  249.87    7.57
   3 -12  -2  255.05    7.81
   3 -12  -2  256.86   11.75
  -3 -12   2  260.09    8.45
   3 -12  -1  652.41   17.61
   3 -12  -1  715.75   11.18
   3 -12  -1  738.40   13.73
   3 -12  -1  717.93   10.83
  -3 -12   1  443.78    9.81
  -3 -11   9   87.29   10.26
   3 -11  -9   74.00    9.14
   3 -11  -9  114.57    9.71
   3 -11  -9  123.65    9.57
  -3 -11   9   99.71   12.22
  -3 -11   8   57.44   11.37
   3 -11  -8   59.36    8.64
  -3 -11   8   58.58   10.95
   3 -11  -8   70.98   11.68
  -3 -11   7  193.57   11.71
   3 -11  -7  143.34    9.03
   3 -11  -7  174.54   10.95
  -3 -11   7  182.17   10.88
   3 -11  -6   61.41   10.66
  -3 -11   6   71.72    8.93
   3 -11  -6   73.76    7.72
  -3 -11   6   73.81   11.32
   3 -11  -5  227.91    9.82
  -3 -11   5  236.56    7.79
   3 -11  -5  219.29    8.25
  -3 -11   5  265.97   15.52
   3 -11  -4  400.49    9.31
  -3 -11   4  372.01    8.81
   3 -11  -4  368.72    9.98
   3 -11  -4  371.75    8.81
   3 -11  -3  664.50   10.51
   3 -11  -3  590.84   12.47
  -3 -11   3  646.51   10.54
   3 -11  -3  384.75    8.83
   3 -11  -2 1286.10   15.44
   3 -11  -2 1341.39   18.08
   3 -11  -2 1238.27   13.68
  -3 -11   2 1149.09   13.45
   3 -11  -1  757.21   17.61
   3 -11  -1  810.34   11.65
   3 -11  -1  813.54   15.58
   3 -11  -1  346.83    8.47
  -3 -11   1  769.60   12.02
  -3 -10   9  132.84   10.15
   3 -10  -9  134.80    9.55
   3 -10  -9  151.59   10.50
  -3 -10   9  150.40   11.20
   3 -10  -8  228.98   10.18
  -3 -10   8  276.49   11.38
   3 -10  -8  247.26   12.69
  -3 -10   8  295.98   11.82
  -3 -10   7   75.48    8.15
   3 -10  -7  101.59    7.83
   3 -10  -7  103.82   10.41
  -3 -10   7  115.01   11.55
   3 -10  -6  472.81    9.93
   3 -10  -6  516.57   13.80
  -3 -10   6  499.00   10.47
  -3 -10   6  481.83   14.49
   3 -10  -5  391.32   10.57
  -3 -10   5  386.59    9.15
  -3 -10   5  424.15   15.64
   3 -10  -5  425.09   11.77
  -3 -10   4  999.54   12.67
   3 -10  -4 1170.16   14.04
   3 -10  -4 1019.74   15.73
   3 -10  -4  976.76   13.21
   3 -10  -3  375.29    8.49
   3 -10  -3  353.07    8.34
   3 -10  -3  352.43    9.88
  -3 -10   3  348.51    9.49
   3 -10  -2  577.66    9.66
   3 -10  -2  636.75   10.07
   3 -10  -2  592.05   11.53
  -3 -10   2  587.20    9.69
   3 -10  -1  673.59   10.35
   3 -10  -1  651.94   12.43
  -3 -10   1  593.27   10.28
   3 -10  -1  570.18   10.39
   3  -9 -10   18.06    8.80
  -3  -9  10   43.44    8.56
   3  -9 -10   43.34    9.55
   3  -9 -10   43.08   10.31
  -3  -9  10   44.60   10.30
  -3  -9   9  160.27   11.01
  -3  -9   9  139.95    9.65
   3  -9  -9   93.39    9.03
   3  -9  -9  132.15   11.98
   3  -9  -8   92.37    8.63
  -3  -9   8   94.99    9.04
   3  -9  -8   76.15    9.51
  -3  -9   8  105.90    9.73
  -3  -9   7   95.16    8.41
   3  -9  -7   98.62    8.38
   3  -9  -7   75.32   10.07
  -3  -9   7  105.05   10.95
   3  -9  -6  796.20   12.19
  -3  -9   6  894.38   14.14
   3  -9  -6  894.00   11.71
  -3  -9   6  848.21   16.96
   3  -9  -5  732.63   14.06
  -3  -9   5  577.32    9.90
  -3  -9   5  698.94   15.49
   3  -9  -5  690.38   10.86
  -3  -9   4  528.29    9.14
   3  -9  -4  786.52   11.17
   3  -9  -4  642.21   11.44
   3  -9  -4  708.98   10.25
  -3  -9   4  725.83   24.92
   3  -9  -3  873.61   12.16
   3  -9  -3  994.92   13.20
   3  -9  -3  991.03   15.62
  -3  -9   3  846.80   11.05
   3  -9  -2  813.74   10.62
   3  -9  -2  911.04   11.44
   3  -9  -2  919.57   13.74
  -3  -9   2  878.39   11.52
   3  -9  -1  856.28   10.97
   3  -9  -1  864.15   10.93
   3  -9  -1  937.02   14.16
  -3  -9   1  924.68   12.23
  -3  -8  10  116.98   12.48
   3  -8 -10   76.80   10.95
   3  -8 -10  120.76   12.61
  -3  -8  10  111.35   10.81
  -3  -8   9  208.76   11.76
   3  -8  -9  183.79    9.40
   3  -8  -9  254.83   10.34
  -3  -8   9  241.11   10.57
   3  -8  -8  128.68   10.50
  -3  -8   8  127.59    9.08
  -3  -8   8  132.21   11.43
   3  -8  -8  132.00    9.56
  -3  -8   7  460.71   10.48
   3  -8  -7  390.52   10.12
   3  -8  -7  492.04   10.36
  -3  -8   7  448.78   11.99
   3  -8  -6  387.25    9.51
  -3  -8   6  462.99   12.03
   3  -8  -6  440.46    9.15
  -3  -8   6  408.56   11.59
   3  -8  -5  857.33   12.42
  -3  -8   5  804.02   11.40
  -3  -8   5  914.79   16.70
   3  -8  -5  898.93   11.57
  -3  -8   4  165.35    6.68
   3  -8  -4  191.75    8.24
  -3  -8   4  224.62   14.06
   3  -8  -4  222.02    7.20
   3  -8  -3  707.93    9.94
   3  -8  -3  832.15   12.19
  -3  -8   3  712.60   10.22
   3  -8  -3  697.04   11.74
   3  -8  -2  770.84   11.39
   3  -8  -2  719.24   12.18
  -3  -8   2  658.86   10.10
   3  -8  -2  663.37   10.97
   3  -8  -1  299.98    7.13
  -3  -8   1  283.97   10.57
   3  -8  -1  272.66    9.06
   3  -7 -10   77.34   10.15
  -3  -7  10  143.30    9.91
  -3  -7  10  168.91   10.60
   3  -7 -10  129.16   10.71
  -3  -7   9  156.06    9.23
   3  -7  -9  138.63    9.61
   3  -7  -9  185.77    9.95
  -3  -7   9  193.84    9.82
   3  -7  -8  334.22    9.65
  -3  -7   8  411.20   10.57
   3  -7  -8  391.15   10.49
  -3  -7   8  445.66   14.04
  -3  -7   7  109.05   10.82
   3  -7  -7   88.74    8.47
   3  -7  -7   66.85    7.59
  -3  -7   7   94.33    9.03
   3  -7  -6  622.75   10.17
  -3  -7   6  690.98   13.53
  -3  -7   6  697.88   13.61
   3  -7  -6  653.71   12.10
   3  -7  -5  343.89   10.85
  -3  -7   5  311.53    8.16
  -3  -7   5  370.01   12.32
   3  -7  -5  354.89   11.16
  -3  -7   4  161.24    6.76
   3  -7  -4  170.02    7.81
  -3  -7   4  196.77   10.04
   3  -7  -4  179.31    6.74
   3  -7  -3  374.24    9.39
   3  -7  -3  415.95    8.53
  -3  -7   3  371.82    8.37
   3  -7  -3  396.38    9.16
   3  -7  -2 1176.20   12.78
   3  -7  -2  905.21   11.01
  -3  -7   2 1200.06   14.16
   3  -7  -2 1282.16   16.02
   3  -7  -1  408.24    7.75
  -3  -7   1  378.42    8.77
   3  -7  -1  433.76   12.14
  -3  -6  11  139.60   12.72
   3  -6 -10  102.36   12.26
  -3  -6  10  116.22    9.71
   3  -6 -10  120.28   10.41
  -3  -6  10  154.08   13.57
  -3  -6   9  165.12    8.86
   3  -6  -9  161.17   11.02
   3  -6  -9  161.06    9.77
  -3  -6   9  187.47   11.86
   3  -6  -8  150.97   11.21
  -3  -6   8  119.59   10.99
   3  -6  -8  154.27    9.96
  -3  -6   8  132.88    9.32
   3  -6  -7  253.57    8.46
   3  -6  -7  154.57    8.07
  -3  -6   7  270.89   10.73
  -3  -6   7  300.86   13.26
   3  -6  -6  165.62    7.81
  -3  -6   6  169.36    7.18
   3  -6  -6  137.64    8.40
  -3  -6   6  150.09    9.08
   3  -6  -5  317.49    8.11
  -3  -6   5  313.69    8.22
   3  -6  -5  327.94    8.07
  -3  -6   5  341.22   10.33
  -3  -6   4  125.00    8.36
   3  -6  -4  117.34    7.10
  -3  -6   4  144.63   10.52
   3  -6  -4  131.76    6.78
   3  -6  -3 1289.57   13.30
   3  -6  -3 1521.23   14.94
  -3  -6   3 1286.49   13.79
   3  -6  -3 1346.57   15.31
   3  -6  -2 1521.83   14.45
   3  -6  -2 1854.09   16.63
  -3  -6   2 1732.08   16.90
   3  -6  -2 1720.44   18.92
   3  -6  -1 1060.52   12.31
  -3  -6   1 1058.14   27.21
  -3  -6   1 1058.84   13.37
   3  -6  -1 1111.37   16.74
   3  -5 -11   29.76   12.92
  -3  -5  11   17.50    8.70
   3  -5 -11   32.46   11.81
  -3  -5  11    3.37   10.72
  -3  -5  10  119.19    9.93
   3  -5 -10   83.10    8.64
  -3  -5  10   93.23    9.14
   3  -5 -10  126.18   10.18
  -3  -5   9  116.47    7.76
   3  -5  -9   80.37    8.39
   3  -5  -9  107.18   10.41
  -3  -5   9  112.94    9.30
   3  -5  -8  453.23   10.58
  -3  -5   8  493.10   10.82
   3  -5  -8  535.49   13.24
  -3  -5   8  519.70   11.58
   3  -5  -7  570.01   11.71
  -3  -5   7  578.92   11.54
   3  -5  -7  639.30   10.60
  -3  -5   7  598.18   12.21
  -3  -5   6  225.30    7.95
   3  -5  -6  232.09    8.85
   3  -5  -6  265.53   10.68
  -3  -5   6  234.90   10.99
   3  -5  -5  688.44   10.06
  -3  -5   5  718.61   11.19
   3  -5  -5  743.25   10.33
  -3  -5   5  744.95   13.43
   3  -5  -4  318.01    8.03
   3  -5  -4  327.83    8.47
  -3  -5   4  316.41    8.29
  -3  -5   4  344.76   10.98
   3  -5  -3 1652.62   15.58
  -3  -5   3 1670.80   28.51
  -3  -5   3 1665.05   16.05
   3  -5  -3 1818.69   18.96
   3  -5  -2  618.97    9.29
   3  -5  -2  503.34    8.39
  -3  -5   2  550.73    9.35
   3  -5  -2  634.08   12.47
   3  -5  -1 1064.20   12.52
  -3  -5   1 1106.97   22.28
  -3  -5   1 1120.75   13.64
   3  -5  -1 1084.39   15.48
  -3  -4  11   56.61    9.41
   3  -4 -11   62.37    9.79
  -3  -4  11   44.20   10.90
   3  -4 -11   62.72   10.64
  -3  -4  10  154.28   10.70
   3  -4 -10  151.40   10.08
   3  -4 -10  152.62   11.03
  -3  -4  10  166.01   10.50
  -3  -4   9  152.26    8.48
  -3  -4   9  198.86   13.04
   3  -4  -9  144.22    9.02
   3  -4  -9  152.94   10.32
  -3  -4   8  362.17   10.20
   3  -4  -8  296.46   10.02
  -3  -4   8  294.86    9.21
   3  -4  -8  380.70   10.41
   3  -4  -7  168.09   10.33
   3  -4  -7  204.40    8.86
  -3  -4   7  168.70    9.58
  -3  -4   7  171.62    9.57
  -3  -4   6  677.61   12.92
   3  -4  -6  656.39   10.78
   3  -4  -6  654.32   10.91
  -3  -4   6  683.51   12.09
   3  -4  -5 1795.76   15.86
   3  -4  -5 1802.64   16.88
  -3  -4   5 1783.73   18.18
  -3  -4   5 1762.65   20.66
  -3  -4   4  879.35   15.16
   3  -4  -4  869.10   11.31
  -3  -4   4  923.31   12.40
   3  -4  -4  770.82   10.74
   3  -4  -3 1374.84   14.21
  -3  -4   3 1412.93   15.05
   3  -4  -3 1428.46   15.38
  -3  -4   3 1403.23   23.03
   3  -4  -2 3231.51   26.28
   3  -4  -2 3944.55   31.24
  -3  -4   2 3767.98   27.40
   3  -4  -2 3797.34   33.95
  -3  -4   1 1642.17   23.74
   3  -4  -1 1374.69   13.42
  -3  -4   1 1560.79   15.07
   3  -4  -1 1634.70   19.82
  -3  -3  11   41.23    9.03
   3  -3 -11   15.35    9.56
   3  -3 -11   52.68   10.08
  -3  -3  11   65.52    9.74
  -3  -3  10  141.37    8.50
   3  -3 -10  115.86    9.73
   3  -3 -10  173.58   15.25
  -3  -3  10  182.92   10.52
  -3  -3   9  204.44    9.08
   3  -3  -9  191.60   10.09
   3  -3  -9  267.16    9.99
  -3  -3   9  208.96   10.20
  -3  -3   8  665.03   11.58
   3  -3  -8  667.98   12.22
   3  -3  -8  810.85   12.58
  -3  -3   8  700.36   11.94
   3  -3  -7  819.32   12.06
  -3  -3   7  832.16   13.48
   3  -3  -7  824.57   12.38
  -3  -3   7  706.34   12.01
  -3  -3   6  693.88   11.21
   3  -3  -6  614.05    9.80
   3  -3  -6  657.55   10.54
  -3  -3   6  676.88   11.87
  -3  -3   5 1240.55   14.54
   3  -3  -5 1163.33   12.69
   3  -3  -5 1205.25   13.23
  -3  -3   5 1240.69   16.36
   3  -3  -4 1964.49   17.36
  -3  -3   4 2040.81   20.57
   3  -3  -4 1984.53   18.33
  -3  -3   4 1967.66   23.12
   3  -3  -3  908.73   11.82
  -3  -3   3 1671.05   23.15
   3  -3  -3 1723.20   17.19
  -3  -3   3 1874.69   19.48
   3  -3  -2  993.53   13.57
  -3  -3   2  923.67   12.04
   3  -3  -2  831.90   11.93
   3  -3  -2  978.26   14.87
   3  -3  -1  415.97   10.88
  -3  -3   1  410.03   10.73
   3  -3  -1  405.68    7.63
  -3  -3   1  389.02    8.69
  -3  -2  11  134.69    9.63
   3  -2 -11  124.76   10.59
   3  -2 -11  135.06   10.17
  -3  -2  11  176.80   10.80
  -3  -2  10  221.58    9.21
   3  -2 -10  203.46   10.94
   3  -2 -10  246.64   13.15
  -3  -2  10  278.13   11.12
   3  -2  -9  260.08   10.45
   3  -2  -9  277.01   10.42
  -3  -2   9  273.16    8.89
  -3  -2   9  282.22   10.66
  -3  -2   8  256.55   10.42
   3  -2  -8  263.84   12.51
   3  -2  -8  240.50   10.21
  -3  -2   8  262.02   11.23
   3  -2  -7  369.60    9.35
  -3  -2   7  370.03    9.01
   3  -2  -7  403.44   10.82
  -3  -2   7  395.09   12.16
  -3  -2   6  689.25   12.82
   3  -2  -6  663.32   10.41
   3  -2  -6  712.48   12.90
  -3  -2   6  670.87   11.61
  -3  -2   5 1049.62   13.18
   3  -2  -5 1026.41   12.21
   3  -2  -5 1051.12   12.88
  -3  -2   5 1085.37   14.81
  -3  -2   4 1134.56   15.97
   3  -2  -4 1185.65   14.97
  -3  -2   4 1160.62   13.67
   3  -2  -4 1087.42   12.48
   3  -2  -3 1756.29   17.99
  -3  -2   3 1627.16   21.67
   3  -2  -3 1742.07   17.45
  -3  -2   3 1774.53   18.21
   3  -2  -2  371.53    8.34
  -3  -2   2  412.97    9.03
   3  -2  -2  407.33    8.71
   3  -2  -2  398.16    9.11
   3  -2  -1 1810.75   20.20
  -3  -2   1 1758.19   20.92
   3  -2  -1 1703.38   16.74
  -3  -2   1 1727.52   17.10
  -3  -1  11   71.91   10.77
   3  -1 -11   89.44   10.92
   3  -1 -11   58.51   12.68
  -3  -1  11   61.16   10.28
  -3  -1  10  161.55    8.92
   3  -1 -10  183.44   12.94
   3  -1 -10  161.04   12.29
  -3  -1  10  165.91   10.11
   3  -1  -9  200.79   11.74
  -3  -1   9  167.93    8.28
   3  -1  -9  202.29   10.25
  -3  -1   9  204.99   13.09
  -3  -1   8  290.43   11.39
   3  -1  -8  259.81    8.91
   3  -1  -8  340.24   14.31
  -3  -1   8  334.21    9.46
  -3  -1   7   59.50    6.95
   3  -1  -7   56.00    7.61
   3  -1  -7   53.65   12.04
  -3  -1   7   50.93   11.08
   3  -1  -6  640.28   10.47
   3  -1  -6  674.51   11.31
  -3  -1   6  633.53   10.98
  -3  -1   6  613.43   11.15
  -3  -1   5 1016.63   12.68
   3  -1  -5  988.40   12.19
   3  -1  -5  862.79   12.05
  -3  -1   5  998.11   13.86
  -3  -1   4  644.62   11.53
  -3  -1   4  661.49   11.54
   3  -1  -4  611.95    9.63
   3  -1  -4  634.70   10.55
   3  -1  -3 1513.98   17.33
  -3  -1   3 1347.24   18.03
  -3  -1   3 1470.93   16.17
   3  -1  -3 1485.49   15.94
   3  -1  -2 2553.10   24.91
   3  -1  -2 2308.57   24.00
   3  -1  -2 2656.94   27.02
  -3  -1   2 2504.68   22.92
  -3  -1   1 2222.13   23.94
  -3  -1   1 2334.55   21.53
   3  -1  -1 2385.08   23.38
   3  -1  -1 2278.69   21.72
   3   0 -11  186.93   11.21
   3   0 -11  216.05   12.33
   3   0 -10  134.71    9.58
   3   0 -10  154.08   10.21
   3   0  -9  241.03   10.17
   3   0  -9  254.00   12.50
   3   0  -8   36.47    7.55
   3   0  -8   29.55    9.15
   3   0  -7  210.60    8.62
   3   0  -7  210.26    9.35
   3   0  -6  625.45   10.74
   3   0  -6  590.15   11.61
   3   0  -5  391.95    8.53
   3   0  -5  235.87    8.47
   3   0  -4  688.79   11.43
   3   0  -4  694.07   11.54
   3   0  -3  158.73    6.72
   3   0  -3  165.26    7.77
   3   0  -2 2674.93   28.34
   3   0  -2 3321.35   32.79
   3   0  -2 3439.90   30.16
   3   0  -1 2674.95   25.67
   3   0  -1 2829.46   25.47
   3   0   0 1181.44   14.46
   3   0   0 1051.71   13.54
   3   0   1 3292.56   25.52
   3   0   1 3640.50   30.31
   3   0   2  270.46    8.59
   3   0   2  305.97   11.89
   3   0   3  652.71   12.07
   3   0   3  640.28   11.47
   3   0   4 1072.88   14.33
   3   0   5  216.52    9.86
   3   0   6   48.68    9.45
   3   0   7  252.15   13.27
   3   0   8   74.57    9.97
   3   0   9   61.63    9.97
  -3   1   0 1779.57   20.42
  -3   1   0 1513.17   15.61
   3   1   0 1644.88   18.11
   3   1   0 1588.37   16.40
  -3   1  -1 1617.40   15.77
  -3   1  -1 1427.05   16.82
   3   1   1 1541.56   18.77
   3   1   1 1526.48   16.76
   3   1   2 1704.16   17.86
  -3   1  -2 1740.81   16.23
  -3   1  -2 1509.91   17.63
   3   1   2 1571.50   16.87
   3   1   3  894.65   12.96
  -3   1  -3  936.64   12.64
  -3   1  -3  872.85   13.93
   3   1   3  916.69   13.36
  -3   1  -4  417.23   12.65
  -3   1  -4  390.75   13.22
   3   1   4  354.27   10.84
  -3   1  -4  337.60   10.12
  -3   1  -5  182.16    9.87
  -3   1  -5  210.27    9.77
   3   1   5  168.34   10.00
  -3   1  -5  155.54    9.75
  -3   1  -6  443.07   12.44
  -3   1  -6  431.67   11.63
  -3   1  -6  408.18   14.57
   3   1   6  305.85   10.92
  -3   1  -7  232.95   10.88
  -3   1  -7  210.09   11.06
  -3   1  -7  129.06    9.55
   3   1   7  181.34   10.97
   3   1   8   66.18    9.20
  -3   1  -8  111.09   12.54
  -3   1  -8  112.93   15.64
  -3   1  -9   82.23   15.05
  -3   1  -9   53.43   10.26
   3   1   9   76.34   11.61
  -3   2   0 3294.46   31.83
  -3   2   0 3773.70   28.32
   3   2   0 3458.92   31.54
   3   2   0 3365.01   25.35
  -3   2  -1 1576.88   14.87
   3   2   1 1460.46   18.25
   3   2   1 1482.47   15.74
  -3   2  -2  132.03    7.66
   3   2   2  116.52    9.66
   3   2   2  112.97    8.64
   3   2   3  565.72   10.74
  -3   2  -3  627.28   12.63
   3   2   3  580.26   11.83
  -3   2  -4  820.67   14.64
  -3   2  -4  745.55   13.04
   3   2   4  728.43   12.95
  -3   2  -5  702.53   14.70
  -3   2  -5  601.90   11.66
   3   2   5  623.61   12.60
  -3   2  -6  315.61   12.30
  -3   2  -6  290.53   11.79
   3   2   6  277.93   10.76
  -3   2  -7  185.07   11.39
  -3   2  -7  179.63   10.90
   3   2   7  205.95   11.00
  -3   2  -7  223.05   13.08
  -3   2  -8  152.99   15.84
  -3   2  -8  151.45   10.80
  -3   2  -8  115.48   11.46
   3   2   8  133.50    9.85
  -3   2  -9   75.76   13.93
  -3   2  -9   55.69   10.60
   3   2   9   66.14    9.79
  -3   3   0 1754.93   16.44
   3   3   0 1696.44   24.14
   3   3   0 1734.13   17.25
   3   3   1 1714.42   16.57
  -3   3  -1 1607.62   21.36
  -3   3  -1 1573.88   14.32
   3   3   1 1642.99   21.08
   3   3   2 1364.21   14.90
  -3   3  -2 1186.56   17.79
  -3   3  -2 1383.55   14.01
   3   3   2 1345.45   17.77
   3   3   3  685.98   11.26
  -3   3  -3  854.73   13.89
  -3   3  -3  591.26   12.31
  -3   3  -3  882.87   17.61
   3   3   3  712.81   13.49
  -3   3  -4 1021.55   13.98
  -3   3  -4 1094.29   19.92
  -3   3  -4  850.08   15.16
   3   3   4  984.75   14.80
  -3   3  -5  433.75   15.34
   3   3   5  335.02   11.34
  -3   3  -5  439.16   11.18
  -3   3  -5  308.51   11.62
   3   3   6  202.67   10.67
  -3   3  -6  261.03   13.81
  -3   3  -6  219.22   11.63
  -3   3  -6  286.08   12.95
  -3   3  -7  242.62   16.97
  -3   3  -7  273.73   14.58
  -3   3  -7  174.58   12.70
   3   3   7  236.48   10.50
  -3   3  -8  148.62   14.69
  -3   3  -8  140.62   11.06
  -3   3  -8  106.44   13.52
   3   3   8  128.72   10.32
  -3   4   0 3588.56   24.97
   3   4   0 3895.30   41.69
   3   4   0 3939.27   27.34
  -3   4  -1  666.75   10.43
   3   4   1  485.68   13.94
  -3   4  -1  604.50   13.48
   3   4   1  618.08   10.41
  -3   4  -2  273.97   12.32
  -3   4  -2  237.54    7.90
   3   4   2  262.88    8.86
   3   4   2  229.83   11.21
   3   4   3 1165.78   13.69
  -3   4  -3 1263.34   21.26
  -3   4  -3 1305.01   15.32
  -3   4  -3 1424.19   24.93
   3   4   3 1276.34   19.03
  -3   4  -4  434.20   13.88
  -3   4  -4  392.18   10.94
  -3   4  -4  343.61   14.63
   3   4   4  355.15   11.61
  -3   4  -5 1212.82   17.43
  -3   4  -5  975.43   21.24
  -3   4  -5 1268.46   25.81
   3   4   5 1000.43   14.93
  -3   4  -6  416.12   18.57
   3   4   6  385.90   11.59
  -3   4  -6  402.82   11.85
  -3   4  -6  292.42   13.18
  -3   4  -7  121.05   14.24
  -3   4  -7  154.97   11.96
  -3   4  -7  108.29   14.47
   3   4   7  143.79    9.81
  -3   4  -8  116.77   18.35
  -3   4  -8   90.37   12.16
  -3   4  -8   48.53   14.60
   3   4   8  110.00   10.47
   3   5   0 2735.17   21.81
  -3   5   0 2887.09   33.27
  -3   5   0 2593.39   19.44
   3   5   0 2688.90   34.39
   3   5   1 1565.80   22.37
  -3   5  -1 1471.71   13.38
  -3   5  -1 1654.63   25.16
   3   5   1 1531.82   15.40
   3   5   2 1744.99   16.60
  -3   5  -2 1676.12   14.86
  -3   5  -2 1548.82   27.56
   3   5   2 1892.43   22.78
  -3   5  -3  553.32   18.22
  -3   5  -3  611.41   12.01
   3   5   3  591.26   13.21
  -3   5  -3  628.36   21.32
  -3   5  -4  517.10   15.87
  -3   5  -4 1039.90   16.60
  -3   5  -4  999.69   25.48
   3   5   4  900.61   14.65
  -3   5  -5  352.72   18.58
  -3   5  -5  310.14   11.12
  -3   5  -5  266.33   14.38
   3   5   5  244.09   11.01
  -3   5  -6  114.41   13.42
  -3   5  -6  112.02   10.88
  -3   5  -6   89.49   14.10
   3   5   6  130.45   10.48
  -3   5  -7   79.36   11.19
  -3   5  -7   70.25   17.67
  -3   5  -7   43.40   11.69
   3   5   7   65.72    9.63
   3   5   8  120.85   10.27
  -3   5  -8  181.57   14.73
  -3   5  -8   76.70   15.94
  -3   5  -8  118.85   22.58
  -3   6   0 1894.77   15.80
   3   6   0 1947.07   17.03
  -3   6   0 2076.82   28.67
   3   6   0 2055.28   29.32
  -3   6  -1 1652.03   14.40
   3   6   1 1736.60   16.06
  -3   6  -1 1911.97   32.38
   3   6   1 1906.33   24.25
   3   6   2  394.22    9.10
  -3   6  -2  439.78   10.06
   3   6   2  415.53   12.40
  -3   6  -3  349.70   11.31
   3   6   3  366.57   11.54
  -3   6  -4  225.36   10.21
   3   6   4  249.38   11.51
  -3   6  -5  332.40   11.20
   3   6   5  274.33   10.56
  -3   6  -6   58.07   19.18
  -3   6  -6  126.26   10.20
  -3   6  -6   89.01   23.56
   3   6   6  102.18   10.71
  -3   6  -7   83.33   19.59
  -3   6  -7  213.09   11.87
   3   6   7  195.95   10.13
  -3   6  -8   35.54   28.42
  -3   6  -8   20.90   21.24
  -3   6  -8   97.73   11.76
   3   6   8   69.10   10.97
  -3   7   0  763.88   16.42
  -3   7   0  659.05    9.29
   3   7   0  677.21   10.92
   3   7   0  670.66   15.09
   3   7   1  427.23    9.34
  -3   7  -1  464.37   17.89
  -3   7  -1  452.30    9.69
   3   7   1  489.43   12.20
   3   7   2  604.27   12.54
  -3   7  -2  681.18   11.81
   3   7   2  689.40   15.40
  -3   7  -3  294.85   10.57
   3   7   3  291.58   10.79
   3   7   4  296.87   11.67
  -3   7  -4  279.80    9.81
  -3   7  -5  252.24   10.93
   3   7   5  241.41   10.58
  -3   7  -6   77.79   10.06
   3   7   6   92.62   14.13
  -3   7  -7  199.12   11.15
   3   7   7  187.21   13.58
  -3   7  -8   95.17   12.64
   3   7   8   98.45   13.12
  -3   8   0  107.44    6.21
   3   8   0  100.54    8.79
  -3   8   0  105.80   10.94
   3   8   0   96.46    7.60
   3   8   1  977.60   12.29
  -3   8  -1 1045.10   12.79
   3   8   1 1013.81   17.17
   3   8   2  604.95   11.06
  -3   8  -2  688.17   11.75
   3   8   2  713.47   13.70
  -3   8  -3  349.60    8.62
   3   8   3  394.73   10.99
   3   8   4  247.40   10.68
  -3   8  -4  280.72    9.77
  -3   8  -5  150.43   11.94
   3   8   5  149.98   10.55
  -3   8  -6   97.81   12.91
   3   8   6  171.42   13.43
  -3   8  -7  192.81   11.46
   3   8   7  196.21   11.68
  -3   8  -8  161.90   12.98
   3   8   8  192.84   12.31
   3   9   0  260.29   10.65
   3   9   0  245.77    8.91
  -3   9   0  303.89    7.64
   3   9   1  626.91   11.14
  -3   9  -1  657.93    9.57
   3   9   1  708.79   15.61
   3   9   2  528.14   10.45
  -3   9  -2  573.35   10.74
   3   9   2  552.49   12.79
  -3   9  -3  237.97    8.22
   3   9   3  280.30   10.99
  -3   9  -4  751.43   12.33
   3   9   4  772.72   14.11
  -3   9  -5  170.91    9.51
   3   9   5  193.04   11.26
  -3   9  -6  202.58   10.75
   3   9   6  209.29   11.62
  -3   9  -7  188.68   14.14
   3   9   7  181.47   12.08
  -3  10   0  709.58   11.67
   3  10   0  600.70   11.01
   3  10   1 1322.71   22.18
   3  10   1 1211.92   14.06
  -3  10  -1 1559.74   14.82
  -3  10  -2  970.49   11.78
   3  10   2 1037.29   17.92
  -3  10  -3  547.67    9.54
   3  10   3  598.72   13.70
  -3  10  -4  334.66    9.67
   3  10   4  268.55   11.05
   3  10   5  319.50   12.43
  -3  10  -5  344.51   10.67
  -3  10  -6  136.19   10.82
   3  10   6  140.09   11.66
   3  10   7  138.70   11.49
  -3  10  -7  115.69   11.00
   3  11   0  577.78   10.89
   3  11   1  723.88   15.69
   3  11   1  720.14   11.64
  -3  11  -1  855.96   11.24
   3  11   2  435.39   12.36
  -3  11  -2  465.03    8.71
   3  11   3  306.41   11.92
  -3  11  -3  271.01    7.97
  -3  11  -4  360.71   10.27
   3  11   4  425.85   12.38
  -3  11  -5  127.63    9.89
   3  11   5  152.14   13.56
  -3  11  -6  184.46   10.72
   3  11   6  188.10   12.26
  -3  11  -7   60.41   10.15
   3  11   7   88.54   16.97
   3  12   0  209.36    8.66
   3  12   1  248.73   10.07
  -3  12  -1  334.16    9.56
   3  12   2  214.12   10.22
  -3  12  -2  188.13    7.50
   3  12   3  309.06   12.14
  -3  12  -3  249.63    8.86
   3  12   4  216.79   11.16
  -3  12  -4  197.81    9.05
   3  12   5  166.89   12.04
  -3  12  -5  148.13    9.87
   3  12   6  182.04   15.97
  -3  12  -6  122.53    9.74
   3  13   0   64.02    7.91
  -3  13  -1   44.22    7.12
  -3  13  -2  130.56    7.94
   3  13   2  151.41   13.21
   3  13   3  128.63   11.06
  -3  13  -3  147.76    7.95
   3  13   4  111.08   14.49
  -3  13  -4  128.68    8.39
  -3  13  -5  105.79    9.70
   3  13   5  118.33   12.50
  -3  13  -6   63.07   12.05
   3  13   6   72.75   14.72
  -3  14  -2  123.00    8.00
   3  14   3  183.47   12.71
  -3  14  -3  189.39    8.55
   3  14   4  163.12   13.33
  -3  14  -4  109.69    8.74
   3  14   5  110.23   15.92
  -3  14  -5  102.60    9.69
   3  15   3  257.18   16.48
  -3  15  -3  219.60    9.10
   3  15   4  194.05   14.71
  -3  15  -4  147.01   11.71
  -3  16  -3  214.23    9.74
   4 -17  -4  155.04   13.14
  -4 -17   4  173.05   10.70
   4 -17  -4  153.05    8.60
   4 -17  -4  144.58   10.68
   4 -17  -4  175.27   11.51
   4 -17  -3   17.99   12.62
  -4 -17   3   35.57   11.04
   4 -17  -3   23.34    7.28
   4 -17  -3   40.67    9.17
   4 -17  -3   13.72   10.61
   4 -17  -2  100.08   10.88
   4 -17  -2   78.45    9.77
  -4 -17   2   62.04   11.23
   4 -17  -2   68.32    9.84
   4 -17  -2   95.43   16.92
   4 -17  -1  114.08   10.82
   4 -17  -1  107.29    9.53
  -4 -17   1  108.23   11.86
  -4 -17   1   88.77   12.25
   4 -17  -1   99.75   15.88
   4 -17  -1   71.10   10.37
   4 -16  -6   29.36   10.27
   4 -16  -6   27.85    7.37
   4 -16  -6   47.78   11.84
  -4 -16   6   13.69    9.88
   4 -16  -6  -12.41    9.91
   4 -16  -5  112.32   13.85
   4 -16  -5  158.76    9.27
   4 -16  -5  132.27   10.41
   4 -16  -5   95.69   11.54
  -4 -16   5  158.93   12.12
  -4 -16   4   22.22   10.84
   4 -16  -4   21.11    7.07
   4 -16  -4   22.72   10.85
   4 -16  -4   22.72    9.38
   4 -16  -4   15.16    9.99
   4 -16  -3  239.95   16.31
  -4 -16   3  224.50   10.18
   4 -16  -3  259.54    9.02
   4 -16  -3  202.91   11.29
   4 -16  -3  242.20    9.63
   4 -16  -2  130.97    9.03
   4 -16  -2  146.93    9.90
  -4 -16   2  102.22    8.68
   4 -16  -2  117.43   11.14
   4 -16  -2   92.93   13.59
   4 -16  -1  368.71   10.11
   4 -16  -1  384.85   10.98
  -4 -16   1  307.99   10.69
   4 -16  -1  278.35   12.83
   4 -16  -1  302.36   16.70
   4 -15  -7   58.22   10.16
   4 -15  -7   80.98    9.06
   4 -15  -7   38.49   10.29
  -4 -15   7   47.98   10.56
   4 -15  -7   77.83    9.40
   4 -15  -6  213.38    8.92
   4 -15  -6  157.97   10.72
   4 -15  -6   90.49    9.85
  -4 -15   6  214.29   10.34
   4 -15  -6  213.12    9.38
  -4 -15   5   32.94    8.91
   4 -15  -5   31.21    9.69
   4 -15  -5   42.12    7.47
   4 -15  -5   28.86   11.83
   4 -15  -5   30.84    8.44
  -4 -15   4  276.24   10.27
   4 -15  -4  276.97    8.88
   4 -15  -4  261.54   10.55
   4 -15  -4  212.38   11.33
   4 -15  -4   84.35    8.87
   4 -15  -3  171.55    9.31
   4 -15  -3  143.78   13.81
  -4 -15   3  189.77   10.63
   4 -15  -3  179.29    8.34
   4 -15  -3  170.64    9.61
   4 -15  -2  238.71   17.99
   4 -15  -2  259.98    9.28
   4 -15  -2  240.53   10.20
  -4 -15   2  199.75   11.10
   4 -15  -2  196.12   10.15
   4 -15  -1   90.38   13.01
   4 -15  -1  117.96    8.30
  -4 -15   1  115.60    8.76
   4 -15  -1   73.35   10.82
   4 -15  -1   43.54    7.95
   4 -14  -7  107.59    9.93
   4 -14  -7  161.95    9.63
   4 -14  -7  119.86   10.48
  -4 -14   7  129.05   11.63
   4 -14  -7  131.16    9.63
   4 -14  -6  106.20   10.27
   4 -14  -6  184.71    8.31
   4 -14  -6  165.35   10.93
  -4 -14   6  177.37    9.20
   4 -14  -6  172.90    8.49
  -4 -14   5  191.33    9.09
   4 -14  -5  137.93   10.06
   4 -14  -5  179.73    8.00
   4 -14  -5  189.51    8.36
   4 -14  -5  163.81   10.34
   4 -14  -4  259.46   11.51
  -4 -14   4  322.76    9.45
   4 -14  -4  333.71    8.81
   4 -14  -4  309.01   10.89
   4 -14  -4  335.70    9.17
   4 -14  -3  420.48    9.49
   4 -14  -3  320.45   12.19
   4 -14  -3  406.29    9.41
  -4 -14   3  444.60   10.30
   4 -14  -3  436.46   14.21
   4 -14  -2  163.03    8.29
   4 -14  -2  147.09   11.54
   4 -14  -2  183.81   10.45
  -4 -14   2  167.68    8.46
   4 -14  -2  134.72    8.86
   4 -14  -1  220.43   13.97
   4 -14  -1  207.08    8.48
   4 -14  -1  218.70    8.53
  -4 -14   1  189.01    9.35
   4 -14  -1  168.35    9.92
  -4 -13   8   57.44   13.31
  -4 -13   8  116.16   10.91
   4 -13  -8  138.84   11.29
   4 -13  -8  163.04    9.50
   4 -13  -7  228.40   11.65
   4 -13  -7  171.23    9.37
  -4 -13   7  205.76    9.40
   4 -13  -7  172.26    8.52
   4 -13  -6  232.82    8.32
   4 -13  -6  172.91    8.15
   4 -13  -6  173.02    9.72
  -4 -13   6  177.54    8.52
  -4 -13   5  314.76    8.59
   4 -13  -5  340.73    8.83
   4 -13  -5  287.73   10.97
   4 -13  -5  276.19   10.00
   4 -13  -4  230.45    8.24
  -4 -13   4  215.67    8.71
   4 -13  -4  238.74   10.12
   4 -13  -4  211.32    9.99
   4 -13  -3  397.88    9.24
  -4 -13   3  407.52    9.62
   4 -13  -3  404.60   10.96
   4 -13  -3  420.95   12.50
   4 -13  -2  268.84   14.58
   4 -13  -2  214.56    8.40
   4 -13  -2  287.03    8.51
  -4 -13   2  325.27    9.07
   4 -13  -2  295.06   10.95
   4 -13  -1  110.44    7.70
   4 -13  -1  106.74   10.92
   4 -13  -1  111.43    7.77
  -4 -13   1  133.15    9.92
   4 -13  -1   98.96    8.08
   4 -12  -9  141.16   10.32
  -4 -12   9  157.77   12.69
   4 -12  -9  128.86    9.55
  -4 -12   9  120.83   11.79
  -4 -12   8   49.93   10.67
   4 -12  -8   76.53    9.67
   4 -12  -8   57.89    9.05
  -4 -12   8   59.05   11.80
  -4 -12   7  152.40   16.48
   4 -12  -7  175.62    9.20
  -4 -12   7  225.86    9.68
   4 -12  -7  210.65    8.57
   4 -12  -6  150.00    8.18
   4 -12  -6  104.26    8.78
  -4 -12   6  108.36    7.41
   4 -12  -6  138.85    9.96
  -4 -12   5  135.79    7.72
   4 -12  -5  136.81    9.55
   4 -12  -5  131.04    9.54
   4 -12  -5  152.47    7.82
  -4 -12   4  186.74    8.00
   4 -12  -4  212.12   10.35
   4 -12  -4  172.10    9.43
   4 -12  -4  192.38    9.57
   4 -12  -3  398.97   10.78
   4 -12  -3  483.64    9.58
  -4 -12   3  511.12    9.55
   4 -12  -3  490.38   12.70
   4 -12  -2   46.27    7.60
   4 -12  -2  222.58    7.78
  -4 -12   2  205.50    7.73
   4 -12  -2  182.73    9.11
   4 -12  -1  237.98   11.73
   4 -12  -1  231.30    8.05
   4 -12  -1  288.73    8.62
  -4 -12   1  250.05    8.55
   4 -12  -1  247.41    9.58
   4 -11  -9   89.92    9.28
  -4 -11   9   67.91    9.39
   4 -11  -9   38.31    8.96
  -4 -11   9   67.35   12.30
   4 -11  -8  122.07    9.08
  -4 -11   8  190.48   10.94
   4 -11  -8  165.87   11.10
  -4 -11   8  147.67   11.10
  -4 -11   7   42.93   12.43
   4 -11  -7   45.48    9.57
   4 -11  -7   21.63    8.35
  -4 -11   7   38.35    9.28
   4 -11  -6  283.10    8.69
   4 -11  -6  213.60    9.84
  -4 -11   6  239.78    9.43
   4 -11  -6  251.53    7.83
   4 -11  -5   40.28    9.52
   4 -11  -5   20.83    8.34
   4 -11  -5   -9.07    7.49
  -4 -11   5   33.89    8.00
  -4 -11   4  803.35   11.64
   4 -11  -4  866.32   13.39
   4 -11  -4  776.69   12.60
   4 -11  -4  743.75   10.75
   4 -11  -3  117.41    7.35
   4 -11  -3  145.96    7.49
  -4 -11   3  162.37    7.73
   4 -11  -3  149.05   10.91
   4 -11  -2   90.41    6.85
   4 -11  -2  573.66    9.72
  -4 -11   2  536.14   10.01
   4 -11  -2  518.20   11.31
   4 -11  -1  170.48    8.69
   4 -11  -1  221.84    9.19
  -4 -11   1  192.64    8.26
   4 -11  -1  185.68    8.52
   4 -10  -9  165.79    9.69
  -4 -10   9  212.95   10.65
   4 -10  -9  152.18    9.67
  -4 -10   9  222.17   12.36
  -4 -10   8   50.05   11.29
   4 -10  -8   48.67    8.58
   4 -10  -8   50.37    9.02
  -4 -10   8   31.93    9.45
   4 -10  -7   96.30    8.25
  -4 -10   7  142.38    7.89
   4 -10  -7  139.70   10.22
  -4 -10   7  151.27   10.56
  -4 -10   6   15.13   10.56
   4 -10  -6   43.01    8.15
  -4 -10   6   17.61    6.70
   4 -10  -6   14.17    7.24
   4 -10  -5  660.46   10.66
   4 -10  -5  563.71   13.48
   4 -10  -5  554.10    9.31
  -4 -10   5  524.61    9.53
  -4 -10   4   29.10    8.80
   4 -10  -4   34.67    6.96
   4 -10  -4   28.33    7.16
   4 -10  -4   21.00    7.85
   4 -10  -3  849.72   10.98
   4 -10  -3  956.48   11.95
  -4 -10   3  877.13   11.75
   4 -10  -3  864.56   13.57
   4 -10  -2  479.52    8.64
  -4 -10   2  460.21    9.55
   4 -10  -2   49.62    6.51
   4 -10  -2  462.60   10.40
   4 -10  -1 1136.32   12.85
  -4 -10   1 1030.14   12.81
   4 -10  -1 1068.43   17.33
  -4  -9  10   66.24    9.58
   4  -9 -10   92.76    9.69
   4  -9 -10   61.33    9.08
  -4  -9  10   72.06   14.44
  -4  -9   9  123.17   10.19
   4  -9  -9  109.96   10.75
  -4  -9   9  135.09    9.65
   4  -9  -9  104.11    9.25
  -4  -9   8  150.28    8.71
   4  -9  -8   92.18    9.01
   4  -9  -8  145.69    9.05
  -4  -9   8  172.20   14.04
  -4  -9   7  135.25   10.18
   4  -9  -7  134.90   10.76
   4  -9  -7  151.45   10.06
  -4  -9   7  131.57    8.26
   4  -9  -6  593.58   13.73
  -4  -9   6  688.16   18.56
  -4  -9   6  587.01   11.27
   4  -9  -6  609.16   10.11
   4  -9  -5  282.75    8.57
   4  -9  -5  216.25    8.34
  -4  -9   5  223.58    7.51
   4  -9  -5  265.65    7.72
   4  -9  -4 1090.57   12.17
  -4  -9   4 1108.46   12.75
   4  -9  -4 1302.67   13.99
   4  -9  -4 1120.37   14.77
   4  -9  -3  301.92    7.85
   4  -9  -3  335.25    8.36
  -4  -9   3  318.33    8.03
   4  -9  -3  334.85   10.77
   4  -9  -2  239.69    7.54
   4  -9  -2 1224.61   12.99
  -4  -9   2 1212.58   13.11
   4  -9  -2 1235.00   17.06
   4  -9  -1  116.32    8.47
  -4  -9   1  104.76    7.86
   4  -9  -1  114.25    9.61
  -4  -8  10   57.81    9.82
  -4  -8  10   48.57    9.59
   4  -8 -10   26.60    8.84
   4  -8 -10   58.83    9.44
   4  -8  -9  212.65    9.81
   4  -8  -9  150.18    8.97
  -4  -8   9  174.04    9.53
  -4  -8   9  193.26   10.28
  -4  -8   8  138.91    8.07
   4  -8  -8  118.31    8.19
   4  -8  -8  139.10    8.71
  -4  -8   8  152.24    9.62
  -4  -8   7  511.35   14.46
  -4  -8   7  444.31   10.10
   4  -8  -7  388.47    9.73
   4  -8  -7  267.35    8.92
  -4  -8   6  782.68   17.06
   4  -8  -6  730.09   10.19
   4  -8  -6  654.49   11.47
  -4  -8   6  652.81   11.88
  -4  -8   5  875.04   20.39
   4  -8  -5  856.18   10.93
   4  -8  -5  771.07   12.98
  -4  -8   5  685.47    9.99
  -4  -8   4  357.92    7.92
   4  -8  -4  404.12    9.16
   4  -8  -4  378.86    9.84
   4  -8  -4  391.81   10.84
   4  -8  -3  177.72    7.12
   4  -8  -3  457.52   10.62
  -4  -8   3  364.29   10.10
   4  -8  -3  376.46    9.33
   4  -8  -2  571.31    8.46
   4  -8  -2 1128.12   11.79
  -4  -8   2 1085.04   13.81
   4  -8  -2 1122.22   15.93
  -4  -8   1  907.88   27.78
   4  -8  -1  877.31   10.30
  -4  -8   1  824.06   11.18
   4  -8  -1  809.09   12.95
  -4  -7  10  109.72    9.49
   4  -7 -10  124.06    9.13
  -4  -7  10  111.34   10.20
   4  -7 -10  115.39   10.77
  -4  -7   9  191.51   10.58
   4  -7  -9  172.05   10.89
  -4  -7   9  168.72    9.12
   4  -7  -9  193.58    9.79
  -4  -7   8  533.34   11.12
  -4  -7   8  549.04   12.74
   4  -7  -8  432.05   10.33
   4  -7  -8  535.34   10.72
  -4  -7   7  349.40    9.19
   4  -7  -7  323.91   10.68
   4  -7  -7  348.33    9.14
  -4  -7   7  367.57   11.04
   4  -7  -6  888.52   11.63
  -4  -7   6  887.13   13.23
   4  -7  -6  915.47   11.05
  -4  -7   6 1059.12   18.41
  -4  -7   5  481.91   14.14
   4  -7  -5  442.07    9.82
  -4  -7   5  435.98    8.33
   4  -7  -5  460.82    9.05
   4  -7  -4  444.03    8.65
   4  -7  -4  547.95   11.66
  -4  -7   4  419.94    8.49
   4  -7  -4  428.33    9.56
   4  -7  -3  940.27   10.45
   4  -7  -3 1108.20   11.60
  -4  -7   3 1031.51   12.03
   4  -7  -3 1019.87   13.48
   4  -7  -2  376.30    7.18
   4  -7  -2  431.06    7.78
  -4  -7   2  469.44    8.90
   4  -7  -2  436.78    9.58
  -4  -7   1  317.18   12.72
   4  -7  -1  319.57    7.21
  -4  -7   1  317.54    8.12
   4  -7  -1  316.41   11.16
   4  -6 -11   44.11    9.21
  -4  -6  11   46.70    9.09
   4  -6 -11   78.89   12.79
  -4  -6  11   51.76   10.18
  -4  -6  10   90.21    9.93
  -4  -6  10   90.96    9.51
   4  -6 -10   96.14    9.39
   4  -6 -10   83.17   10.56
   4  -6  -9  241.16    9.83
  -4  -6   9  255.92    9.13
   4  -6  -9  297.51   10.80
  -4  -6   9  261.73   10.16
  -4  -6   8  124.65    9.55
   4  -6  -8  130.41   10.39
   4  -6  -8   95.69    9.10
  -4  -6   8  132.33   10.18
  -4  -6   7  507.91   10.22
   4  -6  -7  446.62    9.51
   4  -6  -7  524.31    9.80
  -4  -6   7  579.69   12.44
   4  -6  -6  499.56    9.53
  -4  -6   6  497.92   11.25
   4  -6  -6  498.43    9.29
  -4  -6   6  637.22   15.45
  -4  -6   5 1007.44   17.33
   4  -6  -5  908.08   12.02
  -4  -6   5  908.78   11.51
   4  -6  -5  926.02   11.61
   4  -6  -4  462.21    8.35
  -4  -6   4  449.90    8.74
   4  -6  -4  516.17   10.62
   4  -6  -4  448.93    9.41
   4  -6  -3  254.91    6.88
   4  -6  -3  622.81    9.19
  -4  -6   3  551.34   10.45
   4  -6  -3  594.37   11.58
   4  -6  -2  528.27    8.03
   4  -6  -2  640.35    8.82
  -4  -6   2  603.28    9.62
   4  -6  -2  594.40   10.75
   4  -6  -1  928.60   13.76
  -4  -6   1 1062.96   18.31
   4  -6  -1 1041.73   10.98
  -4  -6   1 1039.68   13.34
  -4  -5  11  102.46   10.86
  -4  -5  11   51.21   10.89
   4  -5 -11   72.91   11.13
   4  -5 -11  121.35   10.40
  -4  -5  10  201.67    9.11
   4  -5 -10  203.30   11.51
   4  -5 -10  266.65   11.12
  -4  -5  10  241.56   12.52
  -4  -5   9   69.32    8.12
   4  -5  -9   95.63    8.21
   4  -5  -9   96.30   11.72
  -4  -5   9   98.76    9.03
   4  -5  -8  502.44   10.82
   4  -5  -8  412.54    9.85
  -4  -5   8  472.67   11.51
  -4  -5   8  513.96   13.14
  -4  -5   7   66.02    7.70
   4  -5  -7   33.98    6.89
   4  -5  -7   81.40    7.65
  -4  -5   7   67.66   10.56
  -4  -5   6  450.13    9.16
   4  -5  -6  419.82    9.41
   4  -5  -6  486.38    9.51
  -4  -5   6  539.46   14.29
  -4  -5   5  533.50   11.38
   4  -5  -5  483.82    8.99
  -4  -5   5  501.90    9.26
   4  -5  -5  557.04    9.17
   4  -5  -4  742.87    9.86
   4  -5  -4  830.96   10.85
  -4  -5   4  604.94    9.19
   4  -5  -4  751.82   12.22
   4  -5  -3  774.73    9.85
   4  -5  -3  962.62   12.79
  -4  -5   3  819.16   10.47
   4  -5  -3  840.66   11.94
   4  -5  -2 2070.19   17.13
  -4  -5   2 1988.71   16.43
   4  -5  -2 2038.07   20.87
   4  -5  -1 1026.56   15.66
  -4  -5   1  968.68   15.19
   4  -5  -1  931.21   10.36
  -4  -5   1  956.37   11.53
  -4  -4  11   46.10    8.94
   4  -4 -11   53.24    9.95
   4  -4 -11   70.24   10.00
  -4  -4  11   59.91   10.77
  -4  -4  10   82.45    8.58
   4  -4 -10  100.73   10.62
   4  -4 -10  133.14   10.99
  -4  -4  10  110.40    9.39
  -4  -4   9  199.66    8.76
   4  -4  -9  205.05    8.50
   4  -4  -9  240.67    9.40
  -4  -4   9  223.29   11.16
   4  -4  -8   41.49    8.36
   4  -4  -8   47.98    9.16
  -4  -4   8   58.26    7.39
  -4  -4   8   49.30    8.51
  -4  -4   7  582.13   11.07
   4  -4  -7  563.92    9.90
   4  -4  -7  660.36   13.27
  -4  -4   7  614.02   12.27
  -4  -4   6  497.44   10.71
   4  -4  -6  514.58   11.50
  -4  -4   6  481.57    9.39
   4  -4  -6  491.00   12.01
  -4  -4   5 1117.23   15.80
   4  -4  -5 1037.56   11.74
  -4  -4   5 1061.35   12.91
   4  -4  -5 1016.23   11.48
   4  -4  -4  441.34    8.98
   4  -4  -4  404.87    8.53
  -4  -4   4  412.71    8.23
   4  -4  -3 3336.73   25.51
  -4  -4   3 3641.65   26.64
   4  -4  -3 3970.31   30.14
   4  -4  -3 3662.89   30.72
   4  -4  -2   81.68    5.56
  -4  -4   2   87.85    6.39
   4  -4  -2   76.31    6.69
   4  -4  -1 1087.70   14.51
  -4  -4   1 1070.51   15.86
   4  -4  -1  914.04   10.18
  -4  -4   1  811.84   10.60
  -4  -3  11   67.68    8.90
   4  -3 -11   76.08   10.00
   4  -3 -11   37.20   11.96
  -4  -3  11   68.06   12.20
   4  -3 -10  266.01   11.88
  -4  -3  10  348.52   11.62
   4  -3 -10  350.13   11.25
  -4  -3  10  348.63   11.28
  -4  -3   9   79.26    8.01
   4  -3  -9   69.31    8.79
   4  -3  -9   87.18    9.10
  -4  -3   9   93.74    8.90
   4  -3  -8  389.71   11.25
   4  -3  -8  440.82   10.35
  -4  -3   8  392.41    9.35
  -4  -3   8  446.73   10.87
  -4  -3   7  162.98    8.11
   4  -3  -7  135.55    8.60
   4  -3  -7  142.67    9.82
  -4  -3   7  165.80    8.92
  -4  -3   6 1042.55   14.33
  -4  -3   6  994.34   12.68
   4  -3  -6  978.44   11.86
   4  -3  -6 1047.24   12.44
  -4  -3   5  693.38   11.94
  -4  -3   5  601.17    9.99
   4  -3  -5  607.64    9.63
   4  -3  -5  658.90   11.30
   4  -3  -4 1772.85   16.48
  -4  -3   4 1859.73   22.23
   4  -3  -4 2033.34   18.24
  -4  -3   4 2027.99   18.42
   4  -3  -3  497.38    8.46
   4  -3  -3  512.86    8.81
   4  -3  -3  521.82    9.18
  -4  -3   3  522.41    8.87
   4  -3  -2 1103.62   13.65
  -4  -3   2  916.33   11.17
   4  -3  -2 1105.04   12.01
   4  -3  -1  871.50   14.24
  -4  -3   1  782.87   12.20
   4  -3  -1  767.87    9.51
  -4  -3   1  759.01   10.33
  -4  -2  11  152.55   10.52
  -4  -2  11  142.87   11.30
   4  -2 -11  134.07   11.54
   4  -2 -11   83.76   10.20
  -4  -2  10   94.55   10.02
  -4  -2  10   72.63    8.56
   4  -2 -10   78.41   11.41
   4  -2 -10   70.46    9.32
  -4  -2   9  247.60    8.74
   4  -2  -9  225.53    9.53
   4  -2  -9  237.72   10.15
  -4  -2   9  241.92   12.23
   4  -2  -8  305.79    9.57
  -4  -2   8  324.00    8.97
   4  -2  -8  307.05   10.45
  -4  -2   8  361.53    9.64
  -4  -2   7 1074.80   15.04
   4  -2  -7  943.02   12.86
   4  -2  -7 1018.01   14.61
  -4  -2   7 1076.30   14.30
  -4  -2   6  361.52    9.28
  -4  -2   6  325.68    8.68
   4  -2  -6  321.35    9.99
   4  -2  -6  334.48    8.81
  -4  -2   5 1104.95   15.95
  -4  -2   5 1121.56   14.18
   4  -2  -5 1037.13   11.85
   4  -2  -5 1038.01   12.53
   4  -2  -4  464.04    9.01
  -4  -2   4  427.94    9.61
  -4  -2   4  454.65    8.55
   4  -2  -4  463.12    8.91
   4  -2  -3 2087.73   19.69
   4  -2  -3 2382.03   22.97
  -4  -2   3 2103.57   18.25
   4  -2  -3 2142.62   19.80
  -4  -2   2  589.58   11.70
   4  -2  -2  579.45   10.09
  -4  -2   2  584.54    9.26
   4  -2  -2  519.65    8.54
  -4  -2   1  353.31    8.69
  -4  -2   1  327.97    8.06
   4  -2  -1  349.65    9.00
   4  -2  -1  340.41    7.33
  -4  -1  11   92.58   11.88
  -4  -1  11   95.85    9.16
   4  -1 -11   95.21    9.96
   4  -1 -11  125.52   12.35
   4  -1 -10  322.38   10.47
   4  -1 -10  274.19   11.01
  -4  -1  10  300.17    9.64
  -4  -1  10  309.88   11.56
  -4  -1   9  104.58    9.73
  -4  -1   9   87.93    8.24
   4  -1  -9   75.81    9.34
   4  -1  -9   99.75    8.76
   4  -1  -8  240.05    9.67
  -4  -1   8  245.27    9.75
   4  -1  -8  204.40    9.22
  -4  -1   8  263.26   10.88
  -4  -1   7  344.26    8.87
   4  -1  -7  354.15   10.44
   4  -1  -7  350.17    9.48
  -4  -1   7  353.35    8.90
  -4  -1   6 1513.93   17.84
  -4  -1   6 1449.05   15.32
   4  -1  -6 1440.20   14.53
   4  -1  -6 1022.44   13.17
  -4  -1   5  507.79   10.16
  -4  -1   5  509.73   11.00
   4  -1  -5  474.22    8.97
   4  -1  -5  304.04    8.27
  -4  -1   4 1046.34   14.31
  -4  -1   4 1174.89   14.08
   4  -1  -4 1166.32   12.99
   4  -1  -4 1141.04   13.88
   4  -1  -3 1067.86   12.71
   4  -1  -3 1172.85   15.24
   4  -1  -3  728.83   10.87
  -4  -1   3 1088.31   12.52
  -4  -1   2 2568.41   27.05
  -4  -1   2 2412.15   19.96
   4  -1  -2 2569.15   22.50
   4  -1  -2 2447.01   22.28
  -4  -1   1 1315.99   15.28
  -4  -1   1 1245.79   14.20
   4  -1  -1 1202.51   13.27
   4  -1  -1 1207.71   14.02
   4   0 -11  173.58   11.93
   4   0 -11  188.83   10.91
   4   0 -10   80.94    9.75
   4   0 -10   67.80    9.36
[truncated: 4,052,795 more chars]
